# Supplementary material for: Biota from the coastal wetlands of Praia da Vitória (Terceira, Azores, Portugal): Part 1 - Arthropods
Source: Biodivers Data J. 2018 Jul 25;(6):e27194. doi: 10.3897/BDJ.6.e27194 (PMC6070581; doi:10.3897/BDJ.6.e27194)
Supplement: Supplementary material 1 — LIFE_CWR_TER_Arthropods [file bdj-06-e27194-s001.xlsx]

## Sheet: Folha1
institutionCode	realm	country	archipelago	island	municipality	locality	locationRemarks	verbatimCoordinates	verbatimLatitude	verbatimLongitude	geodeticDatum	minimumElevation	maximumElevation	eventDate	eventTime	samplingProtocol	sampleCode	occurrenceRemarks	recordedBy	abundanceLifeStage	abundanceLifeStageMale	abundanceLifeStageFemale	abundanceLifeStageJuveniles	totalIndividualCount	kingdom	phylum	class	order	family	genus	specificEpithet	infraspecificEpithet	binomialName	scientificNameAuthorship	scientificName	taxonRank	colonizationMeans	identifiedBy	dateIdentified
DTP Collection_568	Palearctic	Portugal	Azores	Terceira	Praia da Vitória	Paul do Belo Jardim	Paul do Belo Jardim - Margins; PBJ-T203	38°42’47.95’’N, 27°03’40.93’’W	38.7134	-27.0616	WGS84	5	10	2016-09-07	Day/Night	Pitfall	sample 14	na	Pimentel, C.	1				1	Animalia	Arthropoda	Insecta	Coleoptera	Carabidae	Acupalpus	flavicollis		Acupalpus flavicollis	(Sturm, 1825)	Acupalpus flavicollis (Sturm, 1825)	species	NAT	Serrano. A.R.M.	2017
DTP Collection_726	Palearctic	Portugal	Azores	Terceira	Praia da Vitória	Paul do Belo Jardim	Paul do Belo Jardim - Stream; PBJ-T204	38°42’47.95’’N, 27°03’40.93’’W	38.7134	-27.0616	WGS84	5	10	2016-09-07	Day/Night	Pitfall	sample 11	na	Pimentel, C.	1				1	Animalia	Arthropoda	Insecta	Coleoptera	Scarabaeidae	Aegialia	arenaria		Aegialia arenaria	(Fabricius, 1787)	Aegialia arenaria (Fabricius, 1787)	species	NAT	Serrano. A.R.M.	2017
DTP Collection_3093	Palearctic	Portugal	Azores	Terceira	Praia da Vitória	Paul da Pedreira	Paul da Pedreira; PPCP-T202	38°42’13.09’’N; 27°02’46.37’’W	38.7043	-27.0465	WGS84	3	10	2017-06-29	Day	Sweeping	sample 01	na	Pimentel, C.	4				4	Animalia	Arthropoda	Insecta	Thysanoptera	Aeolothripidae	Aeolothrips	gloriosus		Aeolothrips gloriosus	Bagnall, 1914	Aeolothrips gloriosus Bagnall, 1914	species	INTR	Borges, P. A.V.	2017
DTP Collection_305	Palearctic	Portugal	Azores	Terceira	Praia da Vitória	Paul da Praia Vitória	Paul da Praia Vitória- Margins; PPV-T200	38°44’06.44’’N, 27°03’36.21’’W	38.735	-27.06	WGS84	6	10	2017-08-23	Day/Night	Pitfall	sample 22	na	Pimentel, C.	1				1	Animalia	Arthropoda	Insecta	Coleoptera	Elateridae	Aeolus	melliculus	moreleti	Aeolus melliculus moreleti	Tarnier, 1860	Aeolus melliculus moreleti Tarnier, 1860	subspecies	INTR	Borges, P. A.V.	2017
DTP Collection_2331	Palearctic	Portugal	Azores	Terceira	Praia da Vitória	Paul da Praia Vitória	Paul da Praia Vitória- Margins; PPV-T200	38°44’06.44’’N, 27°03’36.21’’W	38.735	-27.06	WGS84	6	10	2016-08-26	Day/Night	Pitfall	sample 03	na	Pimentel, C.	3				3	Animalia	Arthropoda	Insecta	Coleoptera	Elateridae	Aeolus	melliculus	moreleti	Aeolus melliculus moreleti	Tarnier, 1860	Aeolus melliculus moreleti Tarnier, 1860	subspecies	INTR	Borges, P. A.V.	2016
DTP Collection_2786	Palearctic	Portugal	Azores	Terceira	Praia da Vitória	Paul da Praia Vitória	Paul da Praia Vitória- Margins; PPV-T200	38°44’06.44’’N, 27°03’36.21’’W	38.735	-27.06	WGS84	6	10	2017-08-31	Night	Active aerial searching	sample 02	na	Brito, M.	1				1	Animalia	Arthropoda	Insecta	Lepidoptera	Noctuidae	Agrotis	ipsilon		Agrotis ipsilon	(Hufnagel, 1766)	Agrotis ipsilon (Hufnagel, 1766)	species	NAT	Borges, P. A.V.	2017
DTP Collection_2787	Palearctic	Portugal	Azores	Terceira	Praia da Vitória	Paul do Belo Jardim	Paul do Belo Jardim - Margins; PBJ-T203	38°42’47.95’’N, 27°03’40.93’’W	38.7134	-27.0616	WGS84	5	10	2017-08-30	Night	Active aerial searching	sample 02	na	Brito, M.	2				2	Animalia	Arthropoda	Insecta	Lepidoptera	Noctuidae	Agrotis	ipsilon		Agrotis ipsilon	(Hufnagel, 1766)	Agrotis ipsilon (Hufnagel, 1766)	species	NAT	Borges, P. A.V.	2017
DTP Collection_727	Palearctic	Portugal	Azores	Terceira	Praia da Vitória	Paul da Praia Vitória	Paul da Praia Vitória- Margins; PPV-T200	38°44’06.44’’N, 27°03’36.21’’W	38.735	-27.06	WGS84	6	10	2016-08-26	Day/Night	Pitfall	sample 11	na	Pimentel, C.	1				1	Animalia	Arthropoda	Insecta	Coleoptera	Silvanidae	Ahasverus	advena		Ahasverus advena	(Waltl, 1832)	Ahasverus advena (Waltl, 1832)	species	INTR	Serrano. A.R.M.	2017
DTP Collection_872	Palearctic	Portugal	Azores	Terceira	Praia da Vitória	Paul da Praia Vitória	Paul da Praia Vitória- Margins; PPV-T200	38°44’06.44’’N, 27°03’36.21’’W	38.735	-27.06	WGS84	6	10	2017-08-23	Day/Night	Pitfall	sample 10	na	Pimentel, C.	1				1	Animalia	Arthropoda	Insecta	Coleoptera	Silvanidae	Ahasverus	advena		Ahasverus advena	(Waltl, 1832)	Ahasverus advena (Waltl, 1832)	species	INTR	Serrano. A.R.M.	2017
DTP Collection_1542	Palearctic	Portugal	Azores	Terceira	Praia da Vitória	Paul do Belo Jardim	Paul do Belo Jardim - Margins; PBJ-T203	38°42’47.95’’N, 27°03’40.93’’W	38.7134	-27.0616	WGS84	5	10	2016-08-08	Day	Beating	sample 06	Arundo donax	Pimentel, C.	1				1	Animalia	Arthropoda	Insecta	Coleoptera	Staphylinidae	Aleochara	bipustulata		Aleochara bipustulata	(Linnaeus, 1761)	Aleochara bipustulata (Linnaeus, 1761)	species	INTR	Borges, P. A.V.	2016
DTP Collection_2461	Palearctic	Portugal	Azores	Terceira	Praia da Vitória	Paul da Praia Vitória	Paul da Praia Vitória- Margins; PPV-T200	38°44’06.44’’N, 27°03’36.21’’W	38.735	-27.06	WGS84	6	10	2017-09-13	Day	Sweeping	sample 02	na	Pimentel, C.		1			1	Animalia	Arthropoda	Arachnida	Araneae	Dictynidae	Altella	lucida		Altella lucida	(Simon, 1874)	Altella lucida (Simon, 1874)	species	INTR	Crespo, L.	2017
DTP Collection_573	Palearctic	Portugal	Azores	Terceira	Praia da Vitória	Paul do Belo Jardim	Paul do Belo Jardim - Stream; PBJ-T204	38°42’47.95’’N, 27°03’40.93’’W	38.7134	-27.0616	WGS84	5	10	2016-09-07	Day/Night	Pitfall	sample 14	na	Pimentel, C.	1				1	Animalia	Arthropoda	Insecta	Coleoptera	Staphylinidae	Amischa	analis		Amischa analis	(Gravenhorst, 1802)	Amischa analis (Gravenhorst, 1802)	species	INTR	Assing, V.	2017
DTP Collection_1215	Palearctic	Portugal	Azores	Terceira	Praia da Vitória	Paul da Pedreira	Paul da Pedreira; PPCP-T202	38°42’13.09’’N; 27°02’46.37’’W	38.7043	-27.0465	WGS84	3	10	2017-06-30	Day/Night	Pitfall	sample 08	na	Pimentel, C.	1				1	Animalia	Arthropoda	Insecta	Coleoptera	Staphylinidae	Amischa	forcipata		Amischa forcipata	Mulsant & Rey, 1873	Amischa forcipata Mulsant & Rey, 1873	species	INTR	Assing, V.	2017
DTP Collection_3176	Palearctic	Portugal	Azores	Terceira	Praia da Vitória	Paul do Belo Jardim	Paul do Belo Jardim - Margins; PBJ-T203	38°42’47.95’’N, 27°03’40.93’’W	38.7134	-27.0616	WGS84	5	10	2016-09-15	Day	Sweeping	sample 01	na	Goulart, S. & Pimentel, C.	1				1	Animalia	Arthropoda	Insecta	Coleoptera	Staphylinidae	Amischa	forcipata		Amischa forcipata	Mulsant & Rey, 1873	Amischa forcipata Mulsant & Rey, 1873	species	INTR	Assing, V.	2017
DTP Collection_9	Palearctic	Portugal	Azores	Terceira	Praia da Vitória	Paul do Belo Jardim	Paul do Belo Jardim - Margins; PBJ-T203	38°42’47.95’’N, 27°03’40.93’’W	38.7134	-27.0616	WGS84	5	10	2017-08-16	Day/Night	Pitfall	sample_ADD3	na	Pimentel, C.	1				1	Animalia	Arthropoda	Insecta	Coleoptera	Carabidae	Anisodactylus	binotatus		Anisodactylus binotatus	(Fabricius, 1787)	Anisodactylus binotatus (Fabricius, 1787)	species	INTR	Borges, P. A.V.	2017
DTP Collection_20	Palearctic	Portugal	Azores	Terceira	Praia da Vitória	Paul do Belo Jardim	Paul do Belo Jardim - Margins; PBJ-T203	38°42’47.95’’N, 27°03’40.93’’W	38.7134	-27.0616	WGS84	5	10	2017-08-16	Day/Night	Pitfall	sample_ADD2	na	Pimentel, C.	2				2	Animalia	Arthropoda	Insecta	Coleoptera	Carabidae	Anisodactylus	binotatus		Anisodactylus binotatus	(Fabricius, 1787)	Anisodactylus binotatus (Fabricius, 1787)	species	INTR	Borges, P. A.V.	2017
DTP Collection_426	Palearctic	Portugal	Azores	Terceira	Praia da Vitória	Paul do Belo Jardim	Paul do Belo Jardim - Margins; PBJ-T203	38°42’47.95’’N, 27°03’40.93’’W	38.7134	-27.0616	WGS84	5	10	2016-09-07	Day/Night	Pitfall	sample 18	na	Pimentel, C.	1				1	Animalia	Arthropoda	Insecta	Coleoptera	Carabidae	Anisodactylus	binotatus		Anisodactylus binotatus	(Fabricius, 1787)	Anisodactylus binotatus (Fabricius, 1787)	species	INTR	Borges, P. A.V.	2016
DTP Collection_529	Palearctic	Portugal	Azores	Terceira	Praia da Vitória	Paul do Belo Jardim	Paul do Belo Jardim - Margins; PBJ-T203	38°42’47.95’’N, 27°03’40.93’’W	38.7134	-27.0616	WGS84	5	10	2016-09-07	Day/Night	Pitfall	sample 15	na	Pimentel, C.	1				1	Animalia	Arthropoda	Insecta	Coleoptera	Carabidae	Anisodactylus	binotatus		Anisodactylus binotatus	(Fabricius, 1787)	Anisodactylus binotatus (Fabricius, 1787)	species	INTR	Borges, P. A.V.	2016
DTP Collection_569	Palearctic	Portugal	Azores	Terceira	Praia da Vitória	Paul do Belo Jardim	Paul do Belo Jardim - Margins; PBJ-T203	38°42’47.95’’N, 27°03’40.93’’W	38.7134	-27.0616	WGS84	5	10	2016-09-07	Day/Night	Pitfall	sample 14	na	Pimentel, C.	5				5	Animalia	Arthropoda	Insecta	Coleoptera	Carabidae	Anisodactylus	binotatus		Anisodactylus binotatus	(Fabricius, 1787)	Anisodactylus binotatus (Fabricius, 1787)	species	INTR	Borges, P. A.V.	2016
DTP Collection_665	Palearctic	Portugal	Azores	Terceira	Praia da Vitória	Paul da Praia Vitória	Paul da Praia Vitória- Margins; PPV-T200	38°44’06.44’’N, 27°03’36.21’’W	38.735	-27.06	WGS84	6	10	2016-08-26	Day/Night	Pitfall	sample 12	na	Pimentel, C.	1				1	Animalia	Arthropoda	Insecta	Coleoptera	Carabidae	Anisodactylus	binotatus		Anisodactylus binotatus	(Fabricius, 1787)	Anisodactylus binotatus (Fabricius, 1787)	species	INTR	Borges, P. A.V.	2016
DTP Collection_1686	Palearctic	Portugal	Azores	Terceira	Praia da Vitória	Paul do Belo Jardim	Paul do Belo Jardim - Margins; PBJ-T203	38°42’47.95’’N, 27°03’40.93’’W	38.7134	-27.0616	WGS84	5	10	2016-09-07	Day/Night	Pitfall	sample 05	na	Pimentel, C.	2				2	Animalia	Arthropoda	Insecta	Coleoptera	Carabidae	Anisodactylus	binotatus		Anisodactylus binotatus	(Fabricius, 1787)	Anisodactylus binotatus (Fabricius, 1787)	species	INTR	Borges, P. A.V.	2016
DTP Collection_2299	Palearctic	Portugal	Azores	Terceira	Praia da Vitória	Paul do Belo Jardim	Paul do Belo Jardim - Margins; PBJ-T203	38°42’47.95’’N, 27°03’40.93’’W	38.7134	-27.0616	WGS84	5	10	2017-08-16	Day/Night	Pitfall	sample 03	na	Pimentel, C.	1				1	Animalia	Arthropoda	Insecta	Coleoptera	Carabidae	Anisodactylus	binotatus		Anisodactylus binotatus	(Fabricius, 1787)	Anisodactylus binotatus (Fabricius, 1787)	species	INTR	Borges, P. A.V.	2017
DTP Collection_3102	Palearctic	Portugal	Azores	Terceira	Praia da Vitória	Paul da Praia Vitória	Paul da Praia Vitória- Margins; PPV-T200	38°44’06.44’’N, 27°03’36.21’’W	38.735	-27.06	WGS84	6	10	2016-08-26	Day/Night	Pitfall	sample 01	na	Pimentel, C.	1				1	Animalia	Arthropoda	Insecta	Coleoptera	Carabidae	Anisodactylus	binotatus		Anisodactylus binotatus	(Fabricius, 1787)	Anisodactylus binotatus (Fabricius, 1787)	species	INTR	Borges, P. A.V.	2016
DTP Collection_238	Palearctic	Portugal	Azores	Terceira	Praia da Vitória	Paul da Pedreira	Paul da Pedreira; PPCP-T202	38°42’13.09’’N; 27°02’46.37’’W	38.7043	-27.0465	WGS84	3	10	2017-06-30	Day/Night	Pitfall	sample 24	na	Pimentel, C.	1				1	Animalia	Arthropoda	Insecta	Hemiptera	Cicadellidae	Anoscopus	albifrons		Anoscopus albifrons	(Linnaeus, 1758)	Anoscopus albifrons (Linnaeus, 1758)	species	NAT	Borges, P. A.V.	2017
DTP Collection_457	Palearctic	Portugal	Azores	Terceira	Praia da Vitória	Paul do Belo Jardim	Paul do Belo Jardim - Margins; PBJ-T203	38°42’47.95’’N, 27°03’40.93’’W	38.7134	-27.0616	WGS84	5	10	2017-08-16	Day/Night	Pitfall	sample 17	na	Pimentel, C.	3				3	Animalia	Arthropoda	Insecta	Hemiptera	Cicadellidae	Anoscopus	albifrons		Anoscopus albifrons	(Linnaeus, 1758)	Anoscopus albifrons (Linnaeus, 1758)	species	NAT	Borges, P. A.V.	2017
DTP Collection_607	Palearctic	Portugal	Azores	Terceira	Praia da Vitória	Paul da Praia Vitória	Paul da Praia Vitória - Island; PPV-T201	38°44’06.44’’N, 27°03’36.21’’W	38.735	-27.06	WGS84	6	10	2016-08-26	Day/Night	Pitfall	sample 13	na	Pimentel, C.	1				1	Animalia	Arthropoda	Insecta	Hemiptera	Cicadellidae	Anoscopus	albifrons		Anoscopus albifrons	(Linnaeus, 1758)	Anoscopus albifrons (Linnaeus, 1758)	species	NAT	Borges, P. A.V.	2016
DTP Collection_720	Palearctic	Portugal	Azores	Terceira	Praia da Vitória	Paul da Praia Vitória	Paul da Praia Vitória- Margins; PPV-T200	38°44’06.44’’N, 27°03’36.21’’W	38.735	-27.06	WGS84	6	10	2016-08-26	Day/Night	Pitfall	sample 11	na	Pimentel, C.	1				1	Animalia	Arthropoda	Insecta	Hemiptera	Cicadellidae	Anoscopus	albifrons		Anoscopus albifrons	(Linnaeus, 1758)	Anoscopus albifrons (Linnaeus, 1758)	species	NAT	Borges, P. A.V.	2016
DTP Collection_1932	Palearctic	Portugal	Azores	Terceira	Praia da Vitória	Paul da Pedreira	Paul da Pedreira; PPCP-T202	38°42’13.09’’N; 27°02’46.37’’W	38.7043	-27.0465	WGS84	3	10	2017-06-30	Day/Night	Pitfall	sample 04	na	Pimentel, C.				1	1	Animalia	Arthropoda	Insecta	Hemiptera	Cicadellidae	Anoscopus	albifrons		Anoscopus albifrons	(Linnaeus, 1758)	Anoscopus albifrons (Linnaeus, 1758)	species	NAT	Borges, P. A.V.	2017
DTP Collection_3051	Palearctic	Portugal	Azores	Terceira	Praia da Vitória	Paul da Praia Vitória	Paul da Praia Vitória- Margins; PPV-T200	38°44’06.44’’N, 27°03’36.21’’W	38.735	-27.06	WGS84	6	10	2016-08-26	Day/Night	Pitfall	sample 01	na	Pimentel, C.	1				1	Animalia	Arthropoda	Insecta	Hemiptera	Cicadellidae	Anoscopus	albifrons		Anoscopus albifrons	(Linnaeus, 1758)	Anoscopus albifrons (Linnaeus, 1758)	species	NAT	Borges, P. A.V.	2016
DTP Collection_186	Palearctic	Portugal	Azores	Terceira	Praia da Vitória	Paul da Praia Vitória	Paul da Praia Vitória- Margins; PPV-T200	38°44’06.44’’N, 27°03’36.21’’W	38.735	-27.06	WGS84	6	10	2017-08-23	Day/Night	Pitfall	sample 26	na	Pimentel, C.	1				1	Animalia	Arthropoda	Insecta	Coleoptera	Staphylinidae	Anotylus	nitidifrons		Anotylus nitidifrons	(Wollaston, 1871)	Anotylus nitidifrons (Wollaston, 1871)	species	INTR	Borges, P. A.V.	2017
DTP Collection_427	Palearctic	Portugal	Azores	Terceira	Praia da Vitória	Paul do Belo Jardim	Paul do Belo Jardim - Margins; PBJ-T203	38°42’47.95’’N, 27°03’40.93’’W	38.7134	-27.0616	WGS84	5	10	2016-09-07	Day/Night	Pitfall	sample 18	na	Pimentel, C.	1				1	Animalia	Arthropoda	Insecta	Coleoptera	Staphylinidae	Anotylus	nitidifrons		Anotylus nitidifrons	(Wollaston, 1871)	Anotylus nitidifrons (Wollaston, 1871)	species	INTR	Borges, P. A.V.	2016
DTP Collection_612	Palearctic	Portugal	Azores	Terceira	Praia da Vitória	Paul da Praia Vitória	Paul da Praia Vitória- Margins; PPV-T200	38°44’06.44’’N, 27°03’36.21’’W	38.735	-27.06	WGS84	6	10	2016-08-26	Day/Night	Pitfall	sample 13	na	Pimentel, C.	1				1	Animalia	Arthropoda	Insecta	Coleoptera	Staphylinidae	Anotylus	nitidifrons		Anotylus nitidifrons	(Wollaston, 1871)	Anotylus nitidifrons (Wollaston, 1871)	species	INTR	Borges, P. A.V.	2016
DTP Collection_668	Palearctic	Portugal	Azores	Terceira	Praia da Vitória	Paul da Praia Vitória	Paul da Praia Vitória- Margins; PPV-T200	38°44’06.44’’N, 27°03’36.21’’W	38.735	-27.06	WGS84	6	10	2016-08-26	Day/Night	Pitfall	sample 12	na	Pimentel, C.	12				12	Animalia	Arthropoda	Insecta	Coleoptera	Staphylinidae	Anotylus	nitidifrons		Anotylus nitidifrons	(Wollaston, 1871)	Anotylus nitidifrons (Wollaston, 1871)	species	INTR	Borges, P. A.V.	2016
DTP Collection_669	Palearctic	Portugal	Azores	Terceira	Praia da Vitória	Paul da Praia Vitória	Paul da Praia Vitória- Margins; PPV-T200	38°44’06.44’’N, 27°03’36.21’’W	38.735	-27.06	WGS84	6	10	2017-08-23	Day/Night	Pitfall	sample 12	na	Pimentel, C.	3				3	Animalia	Arthropoda	Insecta	Coleoptera	Staphylinidae	Anotylus	nitidifrons		Anotylus nitidifrons	(Wollaston, 1871)	Anotylus nitidifrons (Wollaston, 1871)	species	INTR	Borges, P. A.V.	2017
DTP Collection_728	Palearctic	Portugal	Azores	Terceira	Praia da Vitória	Paul da Praia Vitória	Paul da Praia Vitória- Margins; PPV-T200	38°44’06.44’’N, 27°03’36.21’’W	38.735	-27.06	WGS84	6	10	2016-08-26	Day/Night	Pitfall	sample 11	na	Pimentel, C.	3				3	Animalia	Arthropoda	Insecta	Coleoptera	Staphylinidae	Anotylus	nitidifrons		Anotylus nitidifrons	(Wollaston, 1871)	Anotylus nitidifrons (Wollaston, 1871)	species	INTR	Borges, P. A.V.	2016
DTP Collection_729	Palearctic	Portugal	Azores	Terceira	Praia da Vitória	Paul da Praia Vitória	Paul da Praia Vitória- Margins; PPV-T200	38°44’06.44’’N, 27°03’36.21’’W	38.735	-27.06	WGS84	6	10	2016-08-26	Day/Night	Pitfall	sample 11	na	Pimentel, C.	1				1	Animalia	Arthropoda	Insecta	Coleoptera	Staphylinidae	Anotylus	nitidifrons		Anotylus nitidifrons	(Wollaston, 1871)	Anotylus nitidifrons (Wollaston, 1871)	species	INTR	Borges, P. A.V.	2016
DTP Collection_730	Palearctic	Portugal	Azores	Terceira	Praia da Vitória	Paul da Praia Vitória	Paul da Praia Vitória- Margins; PPV-T200	38°44’06.44’’N, 27°03’36.21’’W	38.735	-27.06	WGS84	6	10	2017-08-23	Day/Night	Pitfall	sample 11	na	Pimentel, C.	1				1	Animalia	Arthropoda	Insecta	Coleoptera	Staphylinidae	Anotylus	nitidifrons		Anotylus nitidifrons	(Wollaston, 1871)	Anotylus nitidifrons (Wollaston, 1871)	species	INTR	Borges, P. A.V.	2017
DTP Collection_875	Palearctic	Portugal	Azores	Terceira	Praia da Vitória	Paul da Praia Vitória	Paul da Praia Vitória- Margins; PPV-T200	38°44’06.44’’N, 27°03’36.21’’W	38.735	-27.06	WGS84	6	10	2016-08-26	Day/Night	Pitfall	sample 10	na	Pimentel, C.	6				6	Animalia	Arthropoda	Insecta	Coleoptera	Staphylinidae	Anotylus	nitidifrons		Anotylus nitidifrons	(Wollaston, 1871)	Anotylus nitidifrons (Wollaston, 1871)	species	INTR	Borges, P. A.V.	2016
DTP Collection_876	Palearctic	Portugal	Azores	Terceira	Praia da Vitória	Paul da Praia Vitória	Paul da Praia Vitória- Margins; PPV-T200	38°44’06.44’’N, 27°03’36.21’’W	38.735	-27.06	WGS84	6	10	2017-08-23	Day/Night	Pitfall	sample 10	na	Pimentel, C.	14				14	Animalia	Arthropoda	Insecta	Coleoptera	Staphylinidae	Anotylus	nitidifrons		Anotylus nitidifrons	(Wollaston, 1871)	Anotylus nitidifrons (Wollaston, 1871)	species	INTR	Borges, P. A.V.	2017
DTP Collection_1066	Palearctic	Portugal	Azores	Terceira	Praia da Vitória	Paul da Praia Vitória	Paul da Praia Vitória- Margins; PPV-T200	38°44’06.44’’N, 27°03’36.21’’W	38.735	-27.06	WGS84	6	10	2016-08-26	Day/Night	Pitfall	sample 09	na	Pimentel, C.	8				8	Animalia	Arthropoda	Insecta	Coleoptera	Staphylinidae	Anotylus	nitidifrons		Anotylus nitidifrons	(Wollaston, 1871)	Anotylus nitidifrons (Wollaston, 1871)	species	INTR	Borges, P. A.V.	2016
DTP Collection_1067	Palearctic	Portugal	Azores	Terceira	Praia da Vitória	Paul da Praia Vitória	Paul da Praia Vitória- Margins; PPV-T200	38°44’06.44’’N, 27°03’36.21’’W	38.735	-27.06	WGS84	6	10	2017-08-23	Day/Night	Pitfall	sample 09	na	Pimentel, C.	6				6	Animalia	Arthropoda	Insecta	Coleoptera	Staphylinidae	Anotylus	nitidifrons		Anotylus nitidifrons	(Wollaston, 1871)	Anotylus nitidifrons (Wollaston, 1871)	species	INTR	Borges, P. A.V.	2017
DTP Collection_1216	Palearctic	Portugal	Azores	Terceira	Praia da Vitória	Paul da Praia Vitória	Paul da Praia Vitória - Island; PPV-T201	38°44’06.44’’N, 27°03’36.21’’W	38.735	-27.06	WGS84	6	10	2016-08-26	Day/Night	Pitfall	sample 08	na	Pimentel, C.	1				1	Animalia	Arthropoda	Insecta	Coleoptera	Staphylinidae	Anotylus	nitidifrons		Anotylus nitidifrons	(Wollaston, 1871)	Anotylus nitidifrons (Wollaston, 1871)	species	INTR	Borges, P. A.V.	2016
DTP Collection_1217	Palearctic	Portugal	Azores	Terceira	Praia da Vitória	Paul da Praia Vitória	Paul da Praia Vitória- Margins; PPV-T200	38°44’06.44’’N, 27°03’36.21’’W	38.735	-27.06	WGS84	6	10	2017-08-23	Day/Night	Pitfall	sample 08	na	Pimentel, C.	1				1	Animalia	Arthropoda	Insecta	Coleoptera	Staphylinidae	Anotylus	nitidifrons		Anotylus nitidifrons	(Wollaston, 1871)	Anotylus nitidifrons (Wollaston, 1871)	species	INTR	Borges, P. A.V.	2017
DTP Collection_1369	Palearctic	Portugal	Azores	Terceira	Praia da Vitória	Paul da Praia Vitória	Paul da Praia Vitória- Margins; PPV-T200	38°44’06.44’’N, 27°03’36.21’’W	38.735	-27.06	WGS84	6	10	2016-08-26	Day/Night	Pitfall	sample 07	na	Pimentel, C.	3				3	Animalia	Arthropoda	Insecta	Coleoptera	Staphylinidae	Anotylus	nitidifrons		Anotylus nitidifrons	(Wollaston, 1871)	Anotylus nitidifrons (Wollaston, 1871)	species	INTR	Borges, P. A.V.	2016
DTP Collection_1370	Palearctic	Portugal	Azores	Terceira	Praia da Vitória	Paul da Praia Vitória	Paul da Praia Vitória- Margins; PPV-T200	38°44’06.44’’N, 27°03’36.21’’W	38.735	-27.06	WGS84	6	10	2017-08-23	Day/Night	Pitfall	sample 07	na	Pimentel, C.	7				7	Animalia	Arthropoda	Insecta	Coleoptera	Staphylinidae	Anotylus	nitidifrons		Anotylus nitidifrons	(Wollaston, 1871)	Anotylus nitidifrons (Wollaston, 1871)	species	INTR	Borges, P. A.V.	2017
DTP Collection_1543	Palearctic	Portugal	Azores	Terceira	Praia da Vitória	Paul da Praia Vitória	Paul da Praia Vitória- Margins; PPV-T200	38°44’06.44’’N, 27°03’36.21’’W	38.735	-27.06	WGS84	6	10	2016-08-26	Day/Night	Pitfall	sample 06	na	Pimentel, C.	1				1	Animalia	Arthropoda	Insecta	Coleoptera	Staphylinidae	Anotylus	nitidifrons		Anotylus nitidifrons	(Wollaston, 1871)	Anotylus nitidifrons (Wollaston, 1871)	species	INTR	Borges, P. A.V.	2016
DTP Collection_1717	Palearctic	Portugal	Azores	Terceira	Praia da Vitória	Paul do Belo Jardim	Paul do Belo Jardim - Margins; PBJ-T203	38°42’47.95’’N, 27°03’40.93’’W	38.7134	-27.0616	WGS84	5	10	2016-09-07	Day/Night	Pitfall	sample 05	na	Pimentel, C.	1				1	Animalia	Arthropoda	Insecta	Coleoptera	Staphylinidae	Anotylus	nitidifrons		Anotylus nitidifrons	(Wollaston, 1871)	Anotylus nitidifrons (Wollaston, 1871)	species	INTR	Borges, P. A.V.	2016
DTP Collection_2022	Palearctic	Portugal	Azores	Terceira	Praia da Vitória	Paul da Praia Vitória	Paul da Praia Vitória - Island; PPV-T201	38°44’06.44’’N, 27°03’36.21’’W	38.735	-27.06	WGS84	6	10	2017-08-23	Day/Night	Pitfall	sample 04	na	Pimentel, C.	1				1	Animalia	Arthropoda	Insecta	Coleoptera	Staphylinidae	Anotylus	nitidifrons		Anotylus nitidifrons	(Wollaston, 1871)	Anotylus nitidifrons (Wollaston, 1871)	species	INTR	Borges, P. A.V.	2017
DTP Collection_2366	Palearctic	Portugal	Azores	Terceira	Praia da Vitória	Paul da Praia Vitória	Paul da Praia Vitória- Margins; PPV-T200	38°44’06.44’’N, 27°03’36.21’’W	38.735	-27.06	WGS84	6	10	2016-08-26	Day/Night	Pitfall	sample 03	na	Pimentel, C.	3				3	Animalia	Arthropoda	Insecta	Coleoptera	Staphylinidae	Anotylus	nitidifrons		Anotylus nitidifrons	(Wollaston, 1871)	Anotylus nitidifrons (Wollaston, 1871)	species	INTR	Borges, P. A.V.	2016
DTP Collection_3177	Palearctic	Portugal	Azores	Terceira	Praia da Vitória	Paul da Praia Vitória	Paul da Praia Vitória- Margins; PPV-T200	38°44’06.44’’N, 27°03’36.21’’W	38.735	-27.06	WGS84	6	10	2016-08-26	Day/Night	Pitfall	sample 01	na	Pimentel, C.	3				3	Animalia	Arthropoda	Insecta	Coleoptera	Staphylinidae	Anotylus	nitidifrons		Anotylus nitidifrons	(Wollaston, 1871)	Anotylus nitidifrons (Wollaston, 1871)	species	INTR	Borges, P. A.V.	2016
DTP Collection_2029	Palearctic	Portugal	Azores	Terceira	Praia da Vitória	Paul da Praia Vitória	Paul da Praia Vitória- Margins; PPV-T200	38°44’06.44’’N, 27°03’36.21’’W	38.735	-27.06	WGS84	6	10	2017-08-31	Night	Sweeping	sample 04	na	Brito, M.	1				1	Animalia	Arthropoda	Insecta	Lepidoptera	Gelechiidae	Aproaerema	anthyllidella		Aproaerema anthyllidella	(Hubner, 1813)	Aproaerema anthyllidella (Hubner, 1813)	species	INTR	Borges, P. A.V.	2017
DTP Collection_2784	Palearctic	Portugal	Azores	Terceira	Praia da Vitória	Paul da Pedreira	Paul da Pedreira; PPCP-T202	38°42’13.09’’N; 27°02’46.37’’W	38.7043	-27.0465	WGS84	3	10	2017-07-04	Day	Sweeping	sample 02	na	Pimentel, C.	1				1	Animalia	Arthropoda	Insecta	Lepidoptera	Gelechiidae	Aproaerema	anthyllidella		Aproaerema anthyllidella	(Hubner, 1813)	Aproaerema anthyllidella (Hubner, 1813)	species	INTR	Borges, P. A.V.	2017
DTP Collection_2785	Palearctic	Portugal	Azores	Terceira	Praia da Vitória	Paul da Praia Vitória	Paul da Praia Vitória- Margins; PPV-T200	38°44’06.44’’N, 27°03’36.21’’W	38.735	-27.06	WGS84	6	10	2017-08-31	Night	Beating	sample 02	na	Borges, P.A.V.	3				3	Animalia	Arthropoda	Insecta	Lepidoptera	Gelechiidae	Aproaerema	anthyllidella		Aproaerema anthyllidella	(Hubner, 1813)	Aproaerema anthyllidella (Hubner, 1813)	species	INTR	Borges, P. A.V.	2017
DTP Collection_3189	Palearctic	Portugal	Azores	Terceira	Praia da Vitória	Paul da Pedreira	Paul da Pedreira; PPCP-T202	38°42’13.09’’N; 27°02’46.37’’W	38.7043	-27.0465	WGS84	3	10	2017-06-21	Night	Beating	sample 01	na	Pimentel, C.	1				1	Animalia	Arthropoda	Insecta	Lepidoptera	Gelechiidae	Aproaerema	anthyllidella		Aproaerema anthyllidella	(Hubner, 1813)	Aproaerema anthyllidella (Hubner, 1813)	species	INTR	Borges, P. A.V.	2017
DTP Collection_5	Palearctic	Portugal	Azores	Terceira	Praia da Vitória	Paul do Belo Jardim	Paul do Belo Jardim - Margins; PBJ-T203	38°42’47.95’’N, 27°03’40.93’’W	38.7134	-27.0616	WGS84	5	10	2017-08-16	Day/Night	Pitfall	sample_ADD3	na	Pimentel, C.		1			1	Animalia	Arthropoda	Arachnida	Araneae	Lycosidae	Arctosa	perita		Arctosa perita	(Latreille, 1799)	Arctosa perita (Latreille, 1799)	species	INTR	Borges, P. A.V.	2017
DTP Collection_44	Palearctic	Portugal	Azores	Terceira	Praia da Vitória	Paul do Belo Jardim	Paul do Belo Jardim - Margins; PBJ-T203	38°42’47.95’’N, 27°03’40.93’’W	38.7134	-27.0616	WGS84	5	10	2016-09-07	Day/Night	Pitfall	sample 30	na	Pimentel, C.			1	1	2	Animalia	Arthropoda	Arachnida	Araneae	Lycosidae	Arctosa	perita		Arctosa perita	(Latreille, 1799)	Arctosa perita (Latreille, 1799)	species	INTR	Borges, P. A.V.	2016
DTP Collection_76	Palearctic	Portugal	Azores	Terceira	Praia da Vitória	Paul do Belo Jardim	Paul do Belo Jardim - Margins; PBJ-T203	38°42’47.95’’N, 27°03’40.93’’W	38.7134	-27.0616	WGS84	5	10	2016-09-07	Day/Night	Pitfall	sample 29	na	Pimentel, C.			1		1	Animalia	Arthropoda	Arachnida	Araneae	Lycosidae	Arctosa	perita		Arctosa perita	(Latreille, 1799)	Arctosa perita (Latreille, 1799)	species	INTR	Borges, P. A.V.	2016
DTP Collection_77	Palearctic	Portugal	Azores	Terceira	Praia da Vitória	Paul do Belo Jardim	Paul do Belo Jardim - Margins; PBJ-T203	38°42’47.95’’N, 27°03’40.93’’W	38.7134	-27.0616	WGS84	5	10	2017-08-16	Day/Night	Pitfall	sample 29	na	Pimentel, C.				1	1	Animalia	Arthropoda	Arachnida	Araneae	Lycosidae	Arctosa	perita		Arctosa perita	(Latreille, 1799)	Arctosa perita (Latreille, 1799)	species	INTR	Borges, P. A.V.	2017
DTP Collection_110	Palearctic	Portugal	Azores	Terceira	Praia da Vitória	Paul do Belo Jardim	Paul do Belo Jardim - Margins; PBJ-T203	38°42’47.95’’N, 27°03’40.93’’W	38.7134	-27.0616	WGS84	5	10	2016-09-07	Day/Night	Pitfall	sample 28	na	Pimentel, C.		1		1	2	Animalia	Arthropoda	Arachnida	Araneae	Lycosidae	Arctosa	perita		Arctosa perita	(Latreille, 1799)	Arctosa perita (Latreille, 1799)	species	INTR	Borges, P. A.V.	2016
DTP Collection_111	Palearctic	Portugal	Azores	Terceira	Praia da Vitória	Paul do Belo Jardim	Paul do Belo Jardim - Margins; PBJ-T203	38°42’47.95’’N, 27°03’40.93’’W	38.7134	-27.0616	WGS84	5	10	2017-08-16	Day/Night	Pitfall	sample 28	na	Pimentel, C.			1		1	Animalia	Arthropoda	Arachnida	Araneae	Lycosidae	Arctosa	perita		Arctosa perita	(Latreille, 1799)	Arctosa perita (Latreille, 1799)	species	INTR	Borges, P. A.V.	2017
DTP Collection_141	Palearctic	Portugal	Azores	Terceira	Praia da Vitória	Paul da Pedreira	Paul da Pedreira; PPCP-T202	38°42’13.09’’N; 27°02’46.37’’W	38.7043	-27.0465	WGS84	3	10	2016-08-30	Day/Night	Pitfall	sample 27	na	Pimentel, C.				1	1	Animalia	Arthropoda	Arachnida	Araneae	Lycosidae	Arctosa	perita		Arctosa perita	(Latreille, 1799)	Arctosa perita (Latreille, 1799)	species	INTR	Borges, P. A.V.	2016
DTP Collection_142	Palearctic	Portugal	Azores	Terceira	Praia da Vitória	Paul do Belo Jardim	Paul do Belo Jardim - Margins; PBJ-T203	38°42’47.95’’N, 27°03’40.93’’W	38.7134	-27.0616	WGS84	5	10	2017-08-16	Day/Night	Pitfall	sample 27	na	Pimentel, C.			1	1	2	Animalia	Arthropoda	Arachnida	Araneae	Lycosidae	Arctosa	perita		Arctosa perita	(Latreille, 1799)	Arctosa perita (Latreille, 1799)	species	INTR	Borges, P. A.V.	2017
DTP Collection_207	Palearctic	Portugal	Azores	Terceira	Praia da Vitória	Paul do Belo Jardim	Paul do Belo Jardim - Margins; PBJ-T203	38°42’47.95’’N, 27°03’40.93’’W	38.7134	-27.0616	WGS84	5	10	2016-09-07	Day/Night	Pitfall	sample 25	na	Pimentel, C.				1	1	Animalia	Arthropoda	Arachnida	Araneae	Lycosidae	Arctosa	perita		Arctosa perita	(Latreille, 1799)	Arctosa perita (Latreille, 1799)	species	INTR	Borges, P. A.V.	2016
DTP Collection_208	Palearctic	Portugal	Azores	Terceira	Praia da Vitória	Paul do Belo Jardim	Paul do Belo Jardim - Margins; PBJ-T203	38°42’47.95’’N, 27°03’40.93’’W	38.7134	-27.0616	WGS84	5	10	2017-08-16	Day/Night	Pitfall	sample 25	na	Pimentel, C.		1		2	3	Animalia	Arthropoda	Arachnida	Araneae	Lycosidae	Arctosa	perita		Arctosa perita	(Latreille, 1799)	Arctosa perita (Latreille, 1799)	species	INTR	Borges, P. A.V.	2017
DTP Collection_230	Palearctic	Portugal	Azores	Terceira	Praia da Vitória	Paul do Belo Jardim	Paul do Belo Jardim - Margins; PBJ-T203	38°42’47.95’’N, 27°03’40.93’’W	38.7134	-27.0616	WGS84	5	10	2017-08-16	Day/Night	Pitfall	sample 24	na	Pimentel, C.		1	1		2	Animalia	Arthropoda	Arachnida	Araneae	Lycosidae	Arctosa	perita		Arctosa perita	(Latreille, 1799)	Arctosa perita (Latreille, 1799)	species	INTR	Borges, P. A.V.	2017
DTP Collection_291	Palearctic	Portugal	Azores	Terceira	Praia da Vitória	Paul do Belo Jardim	Paul do Belo Jardim - Margins; PBJ-T203	38°42’47.95’’N, 27°03’40.93’’W	38.7134	-27.0616	WGS84	5	10	2016-09-07	Day/Night	Pitfall	sample 22	na	Pimentel, C.		1	1		2	Animalia	Arthropoda	Arachnida	Araneae	Lycosidae	Arctosa	perita		Arctosa perita	(Latreille, 1799)	Arctosa perita (Latreille, 1799)	species	INTR	Borges, P. A.V.	2016
DTP Collection_354	Palearctic	Portugal	Azores	Terceira	Praia da Vitória	Paul do Belo Jardim	Paul do Belo Jardim - Margins; PBJ-T203	38°42’47.95’’N, 27°03’40.93’’W	38.7134	-27.0616	WGS84	5	10	2017-08-16	Day/Night	Pitfall	sample 20	na	Pimentel, C.		1			1	Animalia	Arthropoda	Arachnida	Araneae	Lycosidae	Arctosa	perita		Arctosa perita	(Latreille, 1799)	Arctosa perita (Latreille, 1799)	species	INTR	Borges, P. A.V.	2017
DTP Collection_516	Palearctic	Portugal	Azores	Terceira	Praia da Vitória	Paul do Belo Jardim	Paul do Belo Jardim - Margins; PBJ-T203	38°42’47.95’’N, 27°03’40.93’’W	38.7134	-27.0616	WGS84	5	10	2016-09-07	Day/Night	Pitfall	sample 15	na	Pimentel, C.				2	2	Animalia	Arthropoda	Arachnida	Araneae	Lycosidae	Arctosa	perita		Arctosa perita	(Latreille, 1799)	Arctosa perita (Latreille, 1799)	species	INTR	Borges, P. A.V.	2016
DTP Collection_517	Palearctic	Portugal	Azores	Terceira	Praia da Vitória	Paul do Belo Jardim	Paul do Belo Jardim - Stream; PBJ-T204	38°42’47.95’’N, 27°03’40.93’’W	38.7134	-27.0616	WGS84	5	10	2016-09-07	Day/Night	Pitfall	sample 15	na	Pimentel, C.				2	2	Animalia	Arthropoda	Arachnida	Araneae	Lycosidae	Arctosa	perita		Arctosa perita	(Latreille, 1799)	Arctosa perita (Latreille, 1799)	species	INTR	Borges, P. A.V.	2016
DTP Collection_557	Palearctic	Portugal	Azores	Terceira	Praia da Vitória	Paul do Belo Jardim	Paul do Belo Jardim - Margins; PBJ-T203	38°42’47.95’’N, 27°03’40.93’’W	38.7134	-27.0616	WGS84	5	10	2016-09-07	Day/Night	Pitfall	sample 14	na	Pimentel, C.				1	1	Animalia	Arthropoda	Arachnida	Araneae	Lycosidae	Arctosa	perita		Arctosa perita	(Latreille, 1799)	Arctosa perita (Latreille, 1799)	species	INTR	Borges, P. A.V.	2016
DTP Collection_558	Palearctic	Portugal	Azores	Terceira	Praia da Vitória	Paul do Belo Jardim	Paul do Belo Jardim - Stream; PBJ-T204	38°42’47.95’’N, 27°03’40.93’’W	38.7134	-27.0616	WGS84	5	10	2016-09-07	Day/Night	Pitfall	sample 14	na	Pimentel, C.			3		3	Animalia	Arthropoda	Arachnida	Araneae	Lycosidae	Arctosa	perita		Arctosa perita	(Latreille, 1799)	Arctosa perita (Latreille, 1799)	species	INTR	Borges, P. A.V.	2016
DTP Collection_594	Palearctic	Portugal	Azores	Terceira	Praia da Vitória	Paul do Belo Jardim	Paul do Belo Jardim - Margins; PBJ-T203	38°42’47.95’’N, 27°03’40.93’’W	38.7134	-27.0616	WGS84	5	10	2016-09-07	Day/Night	Pitfall	sample 13	na	Pimentel, C.			1	2	3	Animalia	Arthropoda	Arachnida	Araneae	Lycosidae	Arctosa	perita		Arctosa perita	(Latreille, 1799)	Arctosa perita (Latreille, 1799)	species	INTR	Borges, P. A.V.	2016
DTP Collection_595	Palearctic	Portugal	Azores	Terceira	Praia da Vitória	Paul do Belo Jardim	Paul do Belo Jardim - Stream; PBJ-T204	38°42’47.95’’N, 27°03’40.93’’W	38.7134	-27.0616	WGS84	5	10	2016-09-07	Day/Night	Pitfall	sample 13	na	Pimentel, C.		2			2	Animalia	Arthropoda	Arachnida	Araneae	Lycosidae	Arctosa	perita		Arctosa perita	(Latreille, 1799)	Arctosa perita (Latreille, 1799)	species	INTR	Borges, P. A.V.	2016
DTP Collection_643	Palearctic	Portugal	Azores	Terceira	Praia da Vitória	Paul do Belo Jardim	Paul do Belo Jardim - Stream; PBJ-T204	38°42’47.95’’N, 27°03’40.93’’W	38.7134	-27.0616	WGS84	5	10	2016-09-07	Day/Night	Pitfall	sample 12	na	Pimentel, C.			1	2	3	Animalia	Arthropoda	Arachnida	Araneae	Lycosidae	Arctosa	perita		Arctosa perita	(Latreille, 1799)	Arctosa perita (Latreille, 1799)	species	INTR	Borges, P. A.V.	2016
DTP Collection_704	Palearctic	Portugal	Azores	Terceira	Praia da Vitória	Paul do Belo Jardim	Paul do Belo Jardim - Stream; PBJ-T204	38°42’47.95’’N, 27°03’40.93’’W	38.7134	-27.0616	WGS84	5	10	2016-09-07	Day/Night	Pitfall	sample 11	na	Pimentel, C.		1		2	3	Animalia	Arthropoda	Arachnida	Araneae	Lycosidae	Arctosa	perita		Arctosa perita	(Latreille, 1799)	Arctosa perita (Latreille, 1799)	species	INTR	Borges, P. A.V.	2016
DTP Collection_780	Palearctic	Portugal	Azores	Terceira	Praia da Vitória	Paul do Belo Jardim	Paul do Belo Jardim - Margins; PBJ-T203	38°42’47.95’’N, 27°03’40.93’’W	38.7134	-27.0616	WGS84	5	10	2016-09-07	Day/Night	Pitfall	sample 10	na	Pimentel, C.				4	4	Animalia	Arthropoda	Arachnida	Araneae	Lycosidae	Arctosa	perita		Arctosa perita	(Latreille, 1799)	Arctosa perita (Latreille, 1799)	species	INTR	Borges, P. A.V.	2016
DTP Collection_781	Palearctic	Portugal	Azores	Terceira	Praia da Vitória	Paul do Belo Jardim	Paul do Belo Jardim - Stream; PBJ-T204	38°42’47.95’’N, 27°03’40.93’’W	38.7134	-27.0616	WGS84	5	10	2016-09-07	Day/Night	Pitfall	sample 10	na	Pimentel, C.			1	2	3	Animalia	Arthropoda	Arachnida	Araneae	Lycosidae	Arctosa	perita		Arctosa perita	(Latreille, 1799)	Arctosa perita (Latreille, 1799)	species	INTR	Borges, P. A.V.	2016
DTP Collection_782	Palearctic	Portugal	Azores	Terceira	Praia da Vitória	Paul do Belo Jardim	Paul do Belo Jardim - Stream; PBJ-T204	38°42’47.95’’N, 27°03’40.93’’W	38.7134	-27.0616	WGS84	5	10	2017-08-16	Day/Night	Pitfall	sample 10	na	Pimentel, C.			1		1	Animalia	Arthropoda	Arachnida	Araneae	Lycosidae	Arctosa	perita		Arctosa perita	(Latreille, 1799)	Arctosa perita (Latreille, 1799)	species	INTR	Borges, P. A.V.	2017
DTP Collection_956	Palearctic	Portugal	Azores	Terceira	Praia da Vitória	Paul do Belo Jardim	Paul do Belo Jardim - Stream; PBJ-T204	38°42’47.95’’N, 27°03’40.93’’W	38.7134	-27.0616	WGS84	5	10	2017-08-16	Day/Night	Pitfall	sample 09	na	Pimentel, C.		1	1		2	Animalia	Arthropoda	Arachnida	Araneae	Lycosidae	Arctosa	perita		Arctosa perita	(Latreille, 1799)	Arctosa perita (Latreille, 1799)	species	INTR	Borges, P. A.V.	2017
DTP Collection_1131	Palearctic	Portugal	Azores	Terceira	Praia da Vitória	Paul do Belo Jardim	Paul do Belo Jardim - Stream; PBJ-T204	38°42’47.95’’N, 27°03’40.93’’W	38.7134	-27.0616	WGS84	5	10	2016-09-07	Day/Night	Pitfall	sample 08	na	Pimentel, C.				2	2	Animalia	Arthropoda	Arachnida	Araneae	Lycosidae	Arctosa	perita		Arctosa perita	(Latreille, 1799)	Arctosa perita (Latreille, 1799)	species	INTR	Borges, P. A.V.	2016
DTP Collection_1284	Palearctic	Portugal	Azores	Terceira	Praia da Vitória	Paul do Belo Jardim	Paul do Belo Jardim - Stream; PBJ-T204	38°42’47.95’’N, 27°03’40.93’’W	38.7134	-27.0616	WGS84	5	10	2016-09-07	Day/Night	Pitfall	sample 07	na	Pimentel, C.			1		1	Animalia	Arthropoda	Arachnida	Araneae	Lycosidae	Arctosa	perita		Arctosa perita	(Latreille, 1799)	Arctosa perita (Latreille, 1799)	species	INTR	Borges, P. A.V.	2016
DTP Collection_1285	Palearctic	Portugal	Azores	Terceira	Praia da Vitória	Paul do Belo Jardim	Paul do Belo Jardim - Stream; PBJ-T204	38°42’47.95’’N, 27°03’40.93’’W	38.7134	-27.0616	WGS84	5	10	2017-08-16	Day/Night	Pitfall	sample 07	na	Pimentel, C.		3		1	4	Animalia	Arthropoda	Arachnida	Araneae	Lycosidae	Arctosa	perita		Arctosa perita	(Latreille, 1799)	Arctosa perita (Latreille, 1799)	species	INTR	Borges, P. A.V.	2017
DTP Collection_1440	Palearctic	Portugal	Azores	Terceira	Praia da Vitória	Paul do Belo Jardim	Paul do Belo Jardim - Stream; PBJ-T204	38°42’47.95’’N, 27°03’40.93’’W	38.7134	-27.0616	WGS84	5	10	2016-09-07	Day/Night	Pitfall	sample 06	na	Pimentel, C.			1	2	3	Animalia	Arthropoda	Arachnida	Araneae	Lycosidae	Arctosa	perita		Arctosa perita	(Latreille, 1799)	Arctosa perita (Latreille, 1799)	species	INTR	Borges, P. A.V.	2016
DTP Collection_1615	Palearctic	Portugal	Azores	Terceira	Praia da Vitória	Paul do Belo Jardim	Paul do Belo Jardim - Stream; PBJ-T204	38°42’47.95’’N, 27°03’40.93’’W	38.7134	-27.0616	WGS84	5	10	2016-09-07	Day/Night	Pitfall	sample 05	na	Pimentel, C.		1	2		3	Animalia	Arthropoda	Arachnida	Araneae	Lycosidae	Arctosa	perita		Arctosa perita	(Latreille, 1799)	Arctosa perita (Latreille, 1799)	species	INTR	Borges, P. A.V.	2016
DTP Collection_1616	Palearctic	Portugal	Azores	Terceira	Praia da Vitória	Paul do Belo Jardim	Paul do Belo Jardim - Stream; PBJ-T204	38°42’47.95’’N, 27°03’40.93’’W	38.7134	-27.0616	WGS84	5	10	2017-08-16	Day/Night	Pitfall	sample 05	na	Pimentel, C.		3			3	Animalia	Arthropoda	Arachnida	Araneae	Lycosidae	Arctosa	perita		Arctosa perita	(Latreille, 1799)	Arctosa perita (Latreille, 1799)	species	INTR	Borges, P. A.V.	2017
DTP Collection_1822	Palearctic	Portugal	Azores	Terceira	Praia da Vitória	Paul do Belo Jardim	Paul do Belo Jardim - Margins; PBJ-T203	38°42’47.95’’N, 27°03’40.93’’W	38.7134	-27.0616	WGS84	5	10	2016-09-07	Day/Night	Pitfall	sample 04	na	Pimentel, C.		1			1	Animalia	Arthropoda	Arachnida	Araneae	Lycosidae	Arctosa	perita		Arctosa perita	(Latreille, 1799)	Arctosa perita (Latreille, 1799)	species	INTR	Borges, P. A.V.	2016
DTP Collection_1823	Palearctic	Portugal	Azores	Terceira	Praia da Vitória	Paul do Belo Jardim	Paul do Belo Jardim - Stream; PBJ-T204	38°42’47.95’’N, 27°03’40.93’’W	38.7134	-27.0616	WGS84	5	10	2017-08-16	Day/Night	Pitfall	sample 04	na	Pimentel, C.			1		1	Animalia	Arthropoda	Arachnida	Araneae	Lycosidae	Arctosa	perita		Arctosa perita	(Latreille, 1799)	Arctosa perita (Latreille, 1799)	species	INTR	Borges, P. A.V.	2017
DTP Collection_2160	Palearctic	Portugal	Azores	Terceira	Praia da Vitória	Paul do Belo Jardim	Paul do Belo Jardim - Stream; PBJ-T204	38°42’47.95’’N, 27°03’40.93’’W	38.7134	-27.0616	WGS84	5	10	2016-09-07	Day/Night	Pitfall	sample 03	na	Pimentel, C.			2		2	Animalia	Arthropoda	Arachnida	Araneae	Lycosidae	Arctosa	perita		Arctosa perita	(Latreille, 1799)	Arctosa perita (Latreille, 1799)	species	INTR	Borges, P. A.V.	2016
DTP Collection_2161	Palearctic	Portugal	Azores	Terceira	Praia da Vitória	Paul do Belo Jardim	Paul do Belo Jardim - Margins; PBJ-T203	38°42’47.95’’N, 27°03’40.93’’W	38.7134	-27.0616	WGS84	5	10	2016-08-31	Night	Active aerial searching	sample 03	na	Borges, P.A.V.		1	1		2	Animalia	Arthropoda	Arachnida	Araneae	Lycosidae	Arctosa	perita		Arctosa perita	(Latreille, 1799)	Arctosa perita (Latreille, 1799)	species	INTR	Borges, P. A.V.	2016
DTP Collection_2162	Palearctic	Portugal	Azores	Terceira	Praia da Vitória	Paul do Belo Jardim	Paul do Belo Jardim - Margins; PBJ-T203	38°42’47.95’’N, 27°03’40.93’’W	38.7134	-27.0616	WGS84	5	10	2017-08-16	Day/Night	Pitfall	sample 03	na	Pimentel, C.		1			1	Animalia	Arthropoda	Arachnida	Araneae	Lycosidae	Arctosa	perita		Arctosa perita	(Latreille, 1799)	Arctosa perita (Latreille, 1799)	species	INTR	Borges, P. A.V.	2017
DTP Collection_2508	Palearctic	Portugal	Azores	Terceira	Praia da Vitória	Paul do Belo Jardim	Paul do Belo Jardim - Stream; PBJ-T204	38°42’47.95’’N, 27°03’40.93’’W	38.7134	-27.0616	WGS84	5	10	2016-09-07	Day/Night	Pitfall	sample 02	na	Pimentel, C.			1	2	3	Animalia	Arthropoda	Arachnida	Araneae	Lycosidae	Arctosa	perita		Arctosa perita	(Latreille, 1799)	Arctosa perita (Latreille, 1799)	species	INTR	Borges, P. A.V.	2016
DTP Collection_2509	Palearctic	Portugal	Azores	Terceira	Praia da Vitória	Paul da Praia Vitória	Paul da Praia Vitória- Margins; PPV-T200	38°44’06.44’’N, 27°03’36.21’’W	38.735	-27.06	WGS84	6	10	2016-08-26	Day/Night	Pitfall	sample 02	na	Pimentel, C.			1		1	Animalia	Arthropoda	Arachnida	Araneae	Lycosidae	Arctosa	perita		Arctosa perita	(Latreille, 1799)	Arctosa perita (Latreille, 1799)	species	INTR	Borges, P. A.V.	2016
DTP Collection_2510	Palearctic	Portugal	Azores	Terceira	Praia da Vitória	Paul do Belo Jardim	Paul do Belo Jardim - Margins; PBJ-T203	38°42’47.95’’N, 27°03’40.93’’W	38.7134	-27.0616	WGS84	5	10	2017-08-16	Day/Night	Pitfall	sample 02	na	Pimentel, C.		1			1	Animalia	Arthropoda	Arachnida	Araneae	Lycosidae	Arctosa	perita		Arctosa perita	(Latreille, 1799)	Arctosa perita (Latreille, 1799)	species	INTR	Borges, P. A.V.	2017
DTP Collection_2511	Palearctic	Portugal	Azores	Terceira	Praia da Vitória	Paul do Belo Jardim	Paul do Belo Jardim - Stream; PBJ-T204	38°42’47.95’’N, 27°03’40.93’’W	38.7134	-27.0616	WGS84	5	10	2017-08-16	Day/Night	Pitfall	sample 02	na	Pimentel, C.		2			2	Animalia	Arthropoda	Arachnida	Araneae	Lycosidae	Arctosa	perita		Arctosa perita	(Latreille, 1799)	Arctosa perita (Latreille, 1799)	species	INTR	Borges, P. A.V.	2017
DTP Collection_2925	Palearctic	Portugal	Azores	Terceira	Praia da Vitória	Paul do Belo Jardim	Paul do Belo Jardim - Stream; PBJ-T204	38°42’47.95’’N, 27°03’40.93’’W	38.7134	-27.0616	WGS84	5	10	2016-09-07	Day/Night	Pitfall	sample 01	na	Pimentel, C.		2		5	7	Animalia	Arthropoda	Arachnida	Araneae	Lycosidae	Arctosa	perita		Arctosa perita	(Latreille, 1799)	Arctosa perita (Latreille, 1799)	species	INTR	Borges, P. A.V.	2016
DTP Collection_379	Palearctic	Portugal	Azores	Terceira	Praia da Vitória	Paul do Belo Jardim	Paul do Belo Jardim - Margins; PBJ-T203	38°42’47.95’’N, 27°03’40.93’’W	38.7134	-27.0616	WGS84	5	10	2016-09-07	Day/Night	Pitfall	sample 19	na	Pimentel, C.			1		1	Animalia	Arthropoda	Arachnida	Araneae	Araneidae	Argiope	bruennichi		Argiope bruennichi	(Scopoli, 1772)	Argiope bruennichi (Scopoli, 1772)	species	NAT	Borges, P. A.V.	2016
DTP Collection_751	Palearctic	Portugal	Azores	Terceira	Praia da Vitória	Paul do Belo Jardim	Paul do Belo Jardim - Margins; PBJ-T203	38°42’47.95’’N, 27°03’40.93’’W	38.7134	-27.0616	WGS84	5	10	2017-08-03	Day	Beating	sample 10	Juncus acutus	Pimentel, C.				2	2	Animalia	Arthropoda	Arachnida	Araneae	Araneidae	Argiope	bruennichi		Argiope bruennichi	(Scopoli, 1772)	Argiope bruennichi (Scopoli, 1772)	species	NAT	Borges, P. A.V.	2017
DTP Collection_930	Palearctic	Portugal	Azores	Terceira	Praia da Vitória	Paul do Belo Jardim	Paul do Belo Jardim - Margins; PBJ-T203	38°42’47.95’’N, 27°03’40.93’’W	38.7134	-27.0616	WGS84	5	10	2016-08-08	Day	Beating	sample 09	Juncus acutus	Pimentel, C.				1	1	Animalia	Arthropoda	Arachnida	Araneae	Araneidae	Argiope	bruennichi		Argiope bruennichi	(Scopoli, 1772)	Argiope bruennichi (Scopoli, 1772)	species	NAT	Borges, P. A.V.	2016
DTP Collection_1105	Palearctic	Portugal	Azores	Terceira	Praia da Vitória	Paul do Belo Jardim	Paul do Belo Jardim - Margins; PBJ-T203	38°42’47.95’’N, 27°03’40.93’’W	38.7134	-27.0616	WGS84	5	10	2017-08-03	Day	Beating	sample 08	Juncus acutus	Pimentel, C.				1	1	Animalia	Arthropoda	Arachnida	Araneae	Araneidae	Argiope	bruennichi		Argiope bruennichi	(Scopoli, 1772)	Argiope bruennichi (Scopoli, 1772)	species	NAT	Borges, P. A.V.	2017
DTP Collection_1257	Palearctic	Portugal	Azores	Terceira	Praia da Vitória	Paul do Belo Jardim	Paul do Belo Jardim - Margins; PBJ-T203	38°42’47.95’’N, 27°03’40.93’’W	38.7134	-27.0616	WGS84	5	10	2017-08-03	Day	Beating	sample 07	Juncus acutus	Pimentel, C.				2	2	Animalia	Arthropoda	Arachnida	Araneae	Araneidae	Argiope	bruennichi		Argiope bruennichi	(Scopoli, 1772)	Argiope bruennichi (Scopoli, 1772)	species	NAT	Borges, P. A.V.	2017
DTP Collection_1764	Palearctic	Portugal	Azores	Terceira	Praia da Vitória	Paul do Belo Jardim	Paul do Belo Jardim - Margins; PBJ-T203	38°42’47.95’’N, 27°03’40.93’’W	38.7134	-27.0616	WGS84	5	10	2016-08-31	Night	Active aerial searching	sample 04	na	Gabriel, R.		2	5	5	12	Animalia	Arthropoda	Arachnida	Araneae	Araneidae	Argiope	bruennichi		Argiope bruennichi	(Scopoli, 1772)	Argiope bruennichi (Scopoli, 1772)	species	NAT	Borges, P. A.V.	2016
DTP Collection_1765	Palearctic	Portugal	Azores	Terceira	Praia da Vitória	Paul da Pedreira	Paul da Pedreira; PPCP-T202	38°42’13.09’’N; 27°02’46.37’’W	38.7043	-27.0465	WGS84	3	10	2017-06-21	Night	Active aerial searching	sample 04	na	Gabriel, R.				1	1	Animalia	Arthropoda	Arachnida	Araneae	Araneidae	Argiope	bruennichi		Argiope bruennichi	(Scopoli, 1772)	Argiope bruennichi (Scopoli, 1772)	species	NAT	Borges, P. A.V.	2017
DTP Collection_1766	Palearctic	Portugal	Azores	Terceira	Praia da Vitória	Paul do Belo Jardim	Paul do Belo Jardim - Margins; PBJ-T203	38°42’47.95’’N, 27°03’40.93’’W	38.7134	-27.0616	WGS84	5	10	2017-08-30	Night	Active aerial searching	sample 04	na	Gabriel, R.		1	3	8	12	Animalia	Arthropoda	Arachnida	Araneae	Araneidae	Argiope	bruennichi		Argiope bruennichi	(Scopoli, 1772)	Argiope bruennichi (Scopoli, 1772)	species	NAT	Borges, P. A.V.	2017
DTP Collection_1767	Palearctic	Portugal	Azores	Terceira	Praia da Vitória	Paul do Belo Jardim	Paul do Belo Jardim - Margins; PBJ-T203	38°42’47.95’’N, 27°03’40.93’’W	38.7134	-27.0616	WGS84	5	10	2017-08-30	Night	Sweeping	sample 04	na	Gabriel, R.		2	4	1	7	Animalia	Arthropoda	Arachnida	Araneae	Araneidae	Argiope	bruennichi		Argiope bruennichi	(Scopoli, 1772)	Argiope bruennichi (Scopoli, 1772)	species	NAT	Borges, P. A.V.	2017
DTP Collection_1768	Palearctic	Portugal	Azores	Terceira	Praia da Vitória	Paul da Pedreira	Paul da Pedreira; PPCP-T202	38°42’13.09’’N; 27°02’46.37’’W	38.7043	-27.0465	WGS84	3	10	2016-06-21	Night	Sweeping	sample 04	na	Gabriel, R.				1	1	Animalia	Arthropoda	Arachnida	Araneae	Araneidae	Argiope	bruennichi		Argiope bruennichi	(Scopoli, 1772)	Argiope bruennichi (Scopoli, 1772)	species	NAT	Borges, P. A.V.	2016
DTP Collection_2087	Palearctic	Portugal	Azores	Terceira	Praia da Vitória	Paul do Belo Jardim	Paul do Belo Jardim - Margins; PBJ-T203	38°42’47.95’’N, 27°03’40.93’’W	38.7134	-27.0616	WGS84	5	10	2016-08-08	Day	Beating	sample 03	Juncus acutus	Pimentel, C.			1	1	2	Animalia	Arthropoda	Arachnida	Araneae	Araneidae	Argiope	bruennichi		Argiope bruennichi	(Scopoli, 1772)	Argiope bruennichi (Scopoli, 1772)	species	NAT	Borges, P. A.V.	2016
DTP Collection_2088	Palearctic	Portugal	Azores	Terceira	Praia da Vitória	Paul da Praia Vitória	Paul da Praia Vitória- Margins; PPV-T200	38°44’06.44’’N, 27°03’36.21’’W	38.735	-27.06	WGS84	6	10	2016-09-15	Day	Sweeping	sample 03	na	Goulart, S. & Pimentel, C.	2				2	Animalia	Arthropoda	Arachnida	Araneae	Araneidae	Argiope	bruennichi		Argiope bruennichi	(Scopoli, 1772)	Argiope bruennichi (Scopoli, 1772)	species	NAT	Borges, P. A.V.	2016
DTP Collection_2089	Palearctic	Portugal	Azores	Terceira	Praia da Vitória	Paul do Belo Jardim	Paul do Belo Jardim - Margins; PBJ-T203	38°42’47.95’’N, 27°03’40.93’’W	38.7134	-27.0616	WGS84	5	10	2016-08-31	Night	Active aerial searching	sample 03	na	Borges, P.A.V.			7	1	8	Animalia	Arthropoda	Arachnida	Araneae	Araneidae	Argiope	bruennichi		Argiope bruennichi	(Scopoli, 1772)	Argiope bruennichi (Scopoli, 1772)	species	NAT	Borges, P. A.V.	2016
DTP Collection_2090	Palearctic	Portugal	Azores	Terceira	Praia da Vitória	Paul do Belo Jardim	Paul do Belo Jardim - Margins; PBJ-T203	38°42’47.95’’N, 27°03’40.93’’W	38.7134	-27.0616	WGS84	5	10	2016-08-31	Night	Active aerial searching	sample 03	na	Borges, P.A.V.		1			1	Animalia	Arthropoda	Arachnida	Araneae	Araneidae	Argiope	bruennichi		Argiope bruennichi	(Scopoli, 1772)	Argiope bruennichi (Scopoli, 1772)	species	NAT	Borges, P. A.V.	2016
DTP Collection_2091	Palearctic	Portugal	Azores	Terceira	Praia da Vitória	Paul do Belo Jardim	Paul do Belo Jardim - Margins; PBJ-T203	38°42’47.95’’N, 27°03’40.93’’W	38.7134	-27.0616	WGS84	5	10	2017-08-03	Day	Beating	sample 03	Juncus acutus	Pimentel, C.			1	1	2	Animalia	Arthropoda	Arachnida	Araneae	Araneidae	Argiope	bruennichi		Argiope bruennichi	(Scopoli, 1772)	Argiope bruennichi (Scopoli, 1772)	species	NAT	Borges, P. A.V.	2017
DTP Collection_2092	Palearctic	Portugal	Azores	Terceira	Praia da Vitória	Paul da Praia Vitória	Paul da Praia Vitória- Margins; PPV-T200	38°44’06.44’’N, 27°03’36.21’’W	38.735	-27.06	WGS84	6	10	2017-08-31	Night	Active aerial searching	sample 03	na	Borges, P.A.V.		9	5	3	17	Animalia	Arthropoda	Arachnida	Araneae	Araneidae	Argiope	bruennichi		Argiope bruennichi	(Scopoli, 1772)	Argiope bruennichi (Scopoli, 1772)	species	NAT	Borges, P. A.V.	2017
DTP Collection_2093	Palearctic	Portugal	Azores	Terceira	Praia da Vitória	Paul do Belo Jardim	Paul do Belo Jardim - Margins; PBJ-T203	38°42’47.95’’N, 27°03’40.93’’W	38.7134	-27.0616	WGS84	5	10	2017-08-30	Night	Active aerial searching	sample 03	na	Borges, P.A.V.		5	5	4	14	Animalia	Arthropoda	Arachnida	Araneae	Araneidae	Argiope	bruennichi		Argiope bruennichi	(Scopoli, 1772)	Argiope bruennichi (Scopoli, 1772)	species	NAT	Borges, P. A.V.	2017
DTP Collection_2094	Palearctic	Portugal	Azores	Terceira	Praia da Vitória	Paul do Belo Jardim	Paul do Belo Jardim - Margins; PBJ-T203	38°42’47.95’’N, 27°03’40.93’’W	38.7134	-27.0616	WGS84	5	10	2017-08-30	Night	Sweeping	sample 03	na	Brito, M.		5	7	6	18	Animalia	Arthropoda	Arachnida	Araneae	Araneidae	Argiope	bruennichi		Argiope bruennichi	(Scopoli, 1772)	Argiope bruennichi (Scopoli, 1772)	species	NAT	Borges, P. A.V.	2017
DTP Collection_2430	Palearctic	Portugal	Azores	Terceira	Praia da Vitória	Paul do Belo Jardim	Paul do Belo Jardim - Margins; PBJ-T203	38°42’47.95’’N, 27°03’40.93’’W	38.7134	-27.0616	WGS84	5	10	2016-09-15	Day	Sweeping	sample 02	na	Goulart, S. & Pimentel, C.		1			1	Animalia	Arthropoda	Arachnida	Araneae	Araneidae	Argiope	bruennichi		Argiope bruennichi	(Scopoli, 1772)	Argiope bruennichi (Scopoli, 1772)	species	NAT	Borges, P. A.V.	2016
DTP Collection_2431	Palearctic	Portugal	Azores	Terceira	Praia da Vitória	Paul do Belo Jardim	Paul do Belo Jardim - Margins; PBJ-T203	38°42’47.95’’N, 27°03’40.93’’W	38.7134	-27.0616	WGS84	5	10	2016-08-31	Night	Active aerial searching	sample 02	na	Pimentel, C.			2		2	Animalia	Arthropoda	Arachnida	Araneae	Araneidae	Argiope	bruennichi		Argiope bruennichi	(Scopoli, 1772)	Argiope bruennichi (Scopoli, 1772)	species	NAT	Borges, P. A.V.	2016
DTP Collection_2432	Palearctic	Portugal	Azores	Terceira	Praia da Vitória	Paul da Pedreira	Paul da Pedreira; PPCP-T202	38°42’13.09’’N; 27°02’46.37’’W	38.7043	-27.0465	WGS84	3	10	2016-08-31	Night	Active aerial searching	sample 02	na	Borges, P.A.V.		1	1		2	Animalia	Arthropoda	Arachnida	Araneae	Araneidae	Argiope	bruennichi		Argiope bruennichi	(Scopoli, 1772)	Argiope bruennichi (Scopoli, 1772)	species	NAT	Borges, P. A.V.	2016
DTP Collection_2433	Palearctic	Portugal	Azores	Terceira	Praia da Vitória	Paul da Pedreira	Paul da Pedreira; PPCP-T202	38°42’13.09’’N; 27°02’46.37’’W	38.7043	-27.0465	WGS84	3	10	2017-07-04	Day	Sweeping	sample 02	na	Pimentel, C.				2	2	Animalia	Arthropoda	Arachnida	Araneae	Araneidae	Argiope	bruennichi		Argiope bruennichi	(Scopoli, 1772)	Argiope bruennichi (Scopoli, 1772)	species	NAT	Borges, P. A.V.	2017
DTP Collection_2434	Palearctic	Portugal	Azores	Terceira	Praia da Vitória	Paul do Belo Jardim	Paul do Belo Jardim - Margins; PBJ-T203	38°42’47.95’’N, 27°03’40.93’’W	38.7134	-27.0616	WGS84	5	10	2017-09-13	Day	Sweeping	sample 02	na	Pimentel, C.			1	1	2	Animalia	Arthropoda	Arachnida	Araneae	Araneidae	Argiope	bruennichi		Argiope bruennichi	(Scopoli, 1772)	Argiope bruennichi (Scopoli, 1772)	species	NAT	Borges, P. A.V.	2017
DTP Collection_2435	Palearctic	Portugal	Azores	Terceira	Praia da Vitória	Paul da Praia Vitória	Paul da Praia Vitória- Margins; PPV-T200	38°44’06.44’’N, 27°03’36.21’’W	38.735	-27.06	WGS84	6	10	2017-08-31	Night	Beating	sample 02	na	Borges, P.A.V.		1			1	Animalia	Arthropoda	Arachnida	Araneae	Araneidae	Argiope	bruennichi		Argiope bruennichi	(Scopoli, 1772)	Argiope bruennichi (Scopoli, 1772)	species	NAT	Borges, P. A.V.	2017
DTP Collection_2436	Palearctic	Portugal	Azores	Terceira	Praia da Vitória	Paul do Belo Jardim	Paul do Belo Jardim - Margins; PBJ-T203	38°42’47.95’’N, 27°03’40.93’’W	38.7134	-27.0616	WGS84	5	10	2017-08-30	Night	Active aerial searching	sample 02	na	Brito, M.		4	15	10	29	Animalia	Arthropoda	Arachnida	Araneae	Araneidae	Argiope	bruennichi		Argiope bruennichi	(Scopoli, 1772)	Argiope bruennichi (Scopoli, 1772)	species	NAT	Borges, P. A.V.	2017
DTP Collection_2855	Palearctic	Portugal	Azores	Terceira	Praia da Vitória	Paul do Belo Jardim	Paul do Belo Jardim - Margins; PBJ-T203	38°42’47.95’’N, 27°03’40.93’’W	38.7134	-27.0616	WGS84	5	10	2016-08-31	Night	Active aerial searching	sample 01	na	Brito, M.			3		3	Animalia	Arthropoda	Arachnida	Araneae	Araneidae	Argiope	bruennichi		Argiope bruennichi	(Scopoli, 1772)	Argiope bruennichi (Scopoli, 1772)	species	NAT	Borges, P. A.V.	2016
DTP Collection_2856	Palearctic	Portugal	Azores	Terceira	Praia da Vitória	Paul da Praia Vitória	Paul da Praia Vitória- Margins; PPV-T200	38°44’06.44’’N, 27°03’36.21’’W	38.735	-27.06	WGS84	6	10	2016-09-01	Night	Active aerial searching	sample 01	na	Brito, M.			1		1	Animalia	Arthropoda	Arachnida	Araneae	Araneidae	Argiope	bruennichi		Argiope bruennichi	(Scopoli, 1772)	Argiope bruennichi (Scopoli, 1772)	species	NAT	Borges, P. A.V.	2016
DTP Collection_2857	Palearctic	Portugal	Azores	Terceira	Praia da Vitória	Paul do Belo Jardim	Paul do Belo Jardim - Margins; PBJ-T203	38°42’47.95’’N, 27°03’40.93’’W	38.7134	-27.0616	WGS84	5	10	2017-09-06	Day	Sweeping	sample 01	na	Pimentel, C.		6		2	8	Animalia	Arthropoda	Arachnida	Araneae	Araneidae	Argiope	bruennichi		Argiope bruennichi	(Scopoli, 1772)	Argiope bruennichi (Scopoli, 1772)	species	NAT	Borges, P. A.V.	2017
DTP Collection_2858	Palearctic	Portugal	Azores	Terceira	Praia da Vitória	Paul da Praia Vitória	Paul da Praia Vitória- Margins; PPV-T200	38°44’06.44’’N, 27°03’36.21’’W	38.735	-27.06	WGS84	6	10	2017-08-31	Night	Beating	sample 01	na	Pimentel, C.		1		1	2	Animalia	Arthropoda	Arachnida	Araneae	Araneidae	Argiope	bruennichi		Argiope bruennichi	(Scopoli, 1772)	Argiope bruennichi (Scopoli, 1772)	species	NAT	Borges, P. A.V.	2017
DTP Collection_2859	Palearctic	Portugal	Azores	Terceira	Praia da Vitória	Paul do Belo Jardim	Paul do Belo Jardim - Margins; PBJ-T203	38°42’47.95’’N, 27°03’40.93’’W	38.7134	-27.0616	WGS84	5	10	2017-08-30	Night	Active aerial searching	sample 01	na	Pimentel, C.			8	5	13	Animalia	Arthropoda	Arachnida	Araneae	Araneidae	Argiope	bruennichi		Argiope bruennichi	(Scopoli, 1772)	Argiope bruennichi (Scopoli, 1772)	species	NAT	Borges, P. A.V.	2017
DTP Collection_2860	Palearctic	Portugal	Azores	Terceira	Praia da Vitória	Paul do Belo Jardim	Paul do Belo Jardim - Margins; PBJ-T203	38°42’47.95’’N, 27°03’40.93’’W	38.7134	-27.0616	WGS84	5	10	2017-08-30	Night	Beating	sample 01	na	Borges, P.A.V.		2	2	9	13	Animalia	Arthropoda	Arachnida	Araneae	Araneidae	Argiope	bruennichi		Argiope bruennichi	(Scopoli, 1772)	Argiope bruennichi (Scopoli, 1772)	species	NAT	Borges, P. A.V.	2017
DTP Collection_849	Palearctic	Portugal	Azores	Terceira	Praia da Vitória	Paul da Pedreira	Paul da Pedreira; PPCP-T202	38°42’13.09’’N; 27°02’46.37’’W	38.7043	-27.0465	WGS84	3	10	2017-06-28	Day	Beating	sample 10	Arundo donax	Pimentel, C.	10				10	Animalia	Arthropoda	Insecta	Coleoptera	Brentidae	Aspidapion	radiolus		Aspidapion radiolus	chalybeipenne, 1854	Aspidapion radiolus chalybeipenne, 1854	species	NAT	Borges, P. A.V.	2017
DTP Collection_850	Palearctic	Portugal	Azores	Terceira	Praia da Vitória	Paul da Pedreira	Paul da Pedreira; PPCP-T202	38°42’13.09’’N; 27°02’46.37’’W	38.7043	-27.0465	WGS84	3	10	2017-06-28	Day	Beating	sample 10	Morella faya	Pimentel, C.	2				2	Animalia	Arthropoda	Insecta	Coleoptera	Brentidae	Aspidapion	radiolus		Aspidapion radiolus	chalybeipenne, 1854	Aspidapion radiolus chalybeipenne, 1854	species	NAT	Borges, P. A.V.	2017
DTP Collection_1028	Palearctic	Portugal	Azores	Terceira	Praia da Vitória	Paul do Belo Jardim	Paul do Belo Jardim - Margins; PBJ-T203	38°42’47.95’’N, 27°03’40.93’’W	38.7134	-27.0616	WGS84	5	10	2017-08-03	Day	Beating	sample 09	Arundo donax	Pimentel, C.	3				3	Animalia	Arthropoda	Insecta	Coleoptera	Brentidae	Aspidapion	radiolus		Aspidapion radiolus	chalybeipenne, 1854	Aspidapion radiolus chalybeipenne, 1854	species	NAT	Borges, P. A.V.	2017
DTP Collection_1029	Palearctic	Portugal	Azores	Terceira	Praia da Vitória	Paul da Pedreira	Paul da Pedreira; PPCP-T202	38°42’13.09’’N; 27°02’46.37’’W	38.7043	-27.0465	WGS84	3	10	2017-06-28	Day	Beating	sample 09	Arundo donax	Pimentel, C.	2				2	Animalia	Arthropoda	Insecta	Coleoptera	Brentidae	Aspidapion	radiolus		Aspidapion radiolus	chalybeipenne, 1854	Aspidapion radiolus chalybeipenne, 1854	species	NAT	Borges, P. A.V.	2017
DTP Collection_1030	Palearctic	Portugal	Azores	Terceira	Praia da Vitória	Paul da Pedreira	Paul da Pedreira; PPCP-T202	38°42’13.09’’N; 27°02’46.37’’W	38.7043	-27.0465	WGS84	3	10	2017-06-28	Day	Beating	sample 09	Morella faya	Pimentel, C.	1				1	Animalia	Arthropoda	Insecta	Coleoptera	Brentidae	Aspidapion	radiolus		Aspidapion radiolus	chalybeipenne, 1854	Aspidapion radiolus chalybeipenne, 1854	species	NAT	Borges, P. A.V.	2017
DTP Collection_1343	Palearctic	Portugal	Azores	Terceira	Praia da Vitória	Paul da Praia Vitória	Paul da Praia Vitória- Margins; PPV-T200	38°44’06.44’’N, 27°03’36.21’’W	38.735	-27.06	WGS84	6	10	2016-08-30	Day	Beating	sample 07	Arundo donax	Pimentel, C.	1				1	Animalia	Arthropoda	Insecta	Coleoptera	Brentidae	Aspidapion	radiolus		Aspidapion radiolus	chalybeipenne, 1854	Aspidapion radiolus chalybeipenne, 1854	species	NAT	Borges, P. A.V.	2016
DTP Collection_1509	Palearctic	Portugal	Azores	Terceira	Praia da Vitória	Paul do Belo Jardim	Paul do Belo Jardim - Margins; PBJ-T203	38°42’47.95’’N, 27°03’40.93’’W	38.7134	-27.0616	WGS84	5	10	2016-08-08	Day	Beating	sample 06	Arundo donax	Pimentel, C.	3				3	Animalia	Arthropoda	Insecta	Coleoptera	Brentidae	Aspidapion	radiolus		Aspidapion radiolus	chalybeipenne, 1854	Aspidapion radiolus chalybeipenne, 1854	species	NAT	Borges, P. A.V.	2016
DTP Collection_1510	Palearctic	Portugal	Azores	Terceira	Praia da Vitória	Paul da Pedreira	Paul da Pedreira; PPCP-T202	38°42’13.09’’N; 27°02’46.37’’W	38.7043	-27.0465	WGS84	3	10	2016-09-15	Day	Sweeping	sample 06	na	Goulart, S. & Pimentel, C.	1				1	Animalia	Arthropoda	Insecta	Coleoptera	Brentidae	Aspidapion	radiolus		Aspidapion radiolus	chalybeipenne, 1854	Aspidapion radiolus chalybeipenne, 1854	species	NAT	Borges, P. A.V.	2016
DTP Collection_1511	Palearctic	Portugal	Azores	Terceira	Praia da Vitória	Paul da Pedreira	Paul da Pedreira; PPCP-T202	38°42’13.09’’N; 27°02’46.37’’W	38.7043	-27.0465	WGS84	3	10	2017-06-28	Day	Beating	sample 06	Morella faya	Pimentel, C.	1				1	Animalia	Arthropoda	Insecta	Coleoptera	Brentidae	Aspidapion	radiolus		Aspidapion radiolus	chalybeipenne, 1854	Aspidapion radiolus chalybeipenne, 1854	species	NAT	Borges, P. A.V.	2017
DTP Collection_1685	Palearctic	Portugal	Azores	Terceira	Praia da Vitória	Paul do Belo Jardim	Paul do Belo Jardim - Margins; PBJ-T203	38°42’47.95’’N, 27°03’40.93’’W	38.7134	-27.0616	WGS84	5	10	2017-08-03	Day	Beating	sample 05	Arundo donax	Pimentel, C.	3				3	Animalia	Arthropoda	Insecta	Coleoptera	Brentidae	Aspidapion	radiolus		Aspidapion radiolus	chalybeipenne, 1854	Aspidapion radiolus chalybeipenne, 1854	species	NAT	Borges, P. A.V.	2017
DTP Collection_1958	Palearctic	Portugal	Azores	Terceira	Praia da Vitória	Paul da Praia Vitória	Paul da Praia Vitória- Margins; PPV-T200	38°44’06.44’’N, 27°03’36.21’’W	38.735	-27.06	WGS84	6	10	2017-08-09	Day	Beating	sample 04	Arundo donax	Pimentel, C.	2				2	Animalia	Arthropoda	Insecta	Coleoptera	Brentidae	Aspidapion	radiolus		Aspidapion radiolus	chalybeipenne, 1854	Aspidapion radiolus chalybeipenne, 1854	species	NAT	Borges, P. A.V.	2017
DTP Collection_1959	Palearctic	Portugal	Azores	Terceira	Praia da Vitória	Paul da Pedreira	Paul da Pedreira; PPCP-T202	38°42’13.09’’N; 27°02’46.37’’W	38.7043	-27.0465	WGS84	3	10	2017-06-21	Night	Active aerial searching	sample 04	na	Gabriel, R.	2				2	Animalia	Arthropoda	Insecta	Coleoptera	Brentidae	Aspidapion	radiolus		Aspidapion radiolus	chalybeipenne, 1854	Aspidapion radiolus chalybeipenne, 1854	species	NAT	Borges, P. A.V.	2017
DTP Collection_2297	Palearctic	Portugal	Azores	Terceira	Praia da Vitória	Paul do Belo Jardim	Paul do Belo Jardim - Margins; PBJ-T203	38°42’47.95’’N, 27°03’40.93’’W	38.7134	-27.0616	WGS84	5	10	2016-08-31	Night	Active aerial searching	sample 03	na	Borges, P.A.V.	1				1	Animalia	Arthropoda	Insecta	Coleoptera	Brentidae	Aspidapion	radiolus		Aspidapion radiolus	chalybeipenne, 1854	Aspidapion radiolus chalybeipenne, 1854	species	NAT	Borges, P. A.V.	2016
DTP Collection_2702	Palearctic	Portugal	Azores	Terceira	Praia da Vitória	Paul da Pedreira	Paul da Pedreira; PPCP-T202	38°42’13.09’’N; 27°02’46.37’’W	38.7043	-27.0465	WGS84	3	10	2016-08-31	Night	Active aerial searching	sample 02	na	Borges, P.A.V.	1				1	Animalia	Arthropoda	Insecta	Coleoptera	Brentidae	Aspidapion	radiolus		Aspidapion radiolus	chalybeipenne, 1854	Aspidapion radiolus chalybeipenne, 1854	species	NAT	Borges, P. A.V.	2016
DTP Collection_2703	Palearctic	Portugal	Azores	Terceira	Praia da Vitória	Paul da Pedreira	Paul da Pedreira; PPCP-T202	38°42’13.09’’N; 27°02’46.37’’W	38.7043	-27.0465	WGS84	3	10	2017-07-04	Day	Sweeping	sample 02	na	Pimentel, C.	16				16	Animalia	Arthropoda	Insecta	Coleoptera	Brentidae	Aspidapion	radiolus		Aspidapion radiolus	chalybeipenne, 1854	Aspidapion radiolus chalybeipenne, 1854	species	NAT	Borges, P. A.V.	2017
DTP Collection_3096	Palearctic	Portugal	Azores	Terceira	Praia da Vitória	Paul da Pedreira	Paul da Pedreira; PPCP-T202	38°42’13.09’’N; 27°02’46.37’’W	38.7043	-27.0465	WGS84	3	10	2017-06-28	Day	Beating	sample 01	Morella faya	Pimentel, C.	1				1	Animalia	Arthropoda	Insecta	Coleoptera	Brentidae	Aspidapion	radiolus		Aspidapion radiolus	chalybeipenne, 1854	Aspidapion radiolus chalybeipenne, 1854	species	NAT	Borges, P. A.V.	2017
DTP Collection_3097	Palearctic	Portugal	Azores	Terceira	Praia da Vitória	Paul da Pedreira	Paul da Pedreira; PPCP-T202	38°42’13.09’’N; 27°02’46.37’’W	38.7043	-27.0465	WGS84	3	10	2017-06-29	Day	Sweeping	sample 01	na	Pimentel, C.	58				58	Animalia	Arthropoda	Insecta	Coleoptera	Brentidae	Aspidapion	radiolus		Aspidapion radiolus	chalybeipenne, 1854	Aspidapion radiolus chalybeipenne, 1854	species	NAT	Borges, P. A.V.	2017
DTP Collection_3098	Palearctic	Portugal	Azores	Terceira	Praia da Vitória	Paul do Belo Jardim	Paul do Belo Jardim - Margins; PBJ-T203	38°42’47.95’’N, 27°03’40.93’’W	38.7134	-27.0616	WGS84	5	10	2017-09-06	Day	Sweeping	sample 01	na	Pimentel, C.	1				1	Animalia	Arthropoda	Insecta	Coleoptera	Brentidae	Aspidapion	radiolus		Aspidapion radiolus	chalybeipenne, 1854	Aspidapion radiolus chalybeipenne, 1854	species	NAT	Borges, P. A.V.	2017
DTP Collection_3099	Palearctic	Portugal	Azores	Terceira	Praia da Vitória	Paul do Belo Jardim	Paul do Belo Jardim - Margins; PBJ-T203	38°42’47.95’’N, 27°03’40.93’’W	38.7134	-27.0616	WGS84	5	10	2017-08-03	Day	Beating	sample 01	Arundo donax	Pimentel, C.	3				3	Animalia	Arthropoda	Insecta	Coleoptera	Brentidae	Aspidapion	radiolus		Aspidapion radiolus	chalybeipenne, 1854	Aspidapion radiolus chalybeipenne, 1854	species	NAT	Borges, P. A.V.	2017
DTP Collection_3100	Palearctic	Portugal	Azores	Terceira	Praia da Vitória	Paul da Pedreira	Paul da Pedreira; PPCP-T202	38°42’13.09’’N; 27°02’46.37’’W	38.7043	-27.0465	WGS84	3	10	2017-06-21	Night	Active aerial searching	sample 01	na	Pimentel, C.	1				1	Animalia	Arthropoda	Insecta	Coleoptera	Brentidae	Aspidapion	radiolus		Aspidapion radiolus	chalybeipenne, 1854	Aspidapion radiolus chalybeipenne, 1854	species	NAT	Borges, P. A.V.	2017
DTP Collection_3101	Palearctic	Portugal	Azores	Terceira	Praia da Vitória	Paul da Pedreira	Paul da Pedreira; PPCP-T202	38°42’13.09’’N; 27°02’46.37’’W	38.7043	-27.0465	WGS84	3	10	2017-06-21	Night	Beating	sample 01	na	Pimentel, C.	8				8	Animalia	Arthropoda	Insecta	Coleoptera	Brentidae	Aspidapion	radiolus		Aspidapion radiolus	chalybeipenne, 1854	Aspidapion radiolus chalybeipenne, 1854	species	NAT	Borges, P. A.V.	2017
DTP Collection_1718	Palearctic	Portugal	Azores	Terceira	Praia da Vitória	Paul do Belo Jardim	Paul do Belo Jardim - Margins; PBJ-T203	38°42’47.95’’N, 27°03’40.93’’W	38.7134	-27.0616	WGS84	5	10	2016-08-08	Day	Beating	sample 05	Arundo donax	Pimentel, C.	1				1	Animalia	Arthropoda	Insecta	Coleoptera	Staphylinidae	Astenus	lyonessius		Astenus lyonessius	(Joy, 1908)	Astenus lyonessius (Joy, 1908)	species	NAT	Borges, P. A.V.	2016
DTP Collection_2367	Palearctic	Portugal	Azores	Terceira	Praia da Vitória	Paul do Belo Jardim	Paul do Belo Jardim - Margins; PBJ-T203	38°42’47.95’’N, 27°03’40.93’’W	38.7134	-27.0616	WGS84	5	10	2017-08-30	Night	Active aerial searching	sample 03	na	Borges, P.A.V.	1				1	Animalia	Arthropoda	Insecta	Coleoptera	Staphylinidae	Astenus	lyonessius		Astenus lyonessius	(Joy, 1908)	Astenus lyonessius (Joy, 1908)	species	NAT	Borges, P. A.V.	2017
DTP Collection_127	Palearctic	Portugal	Azores	Terceira	Praia da Vitória	Paul da Praia Vitória	Paul da Praia Vitória- Margins; PPV-T200	38°44’06.44’’N, 27°03’36.21’’W	38.735	-27.06	WGS84	6	10	2017-08-23	Day/Night	Pitfall	sample 28	na	Pimentel, C.	1				1	Animalia	Arthropoda	Insecta	Coleoptera	Staphylinidae	Atheta	fungi		Atheta fungi	(Gravenhorst, 1806)	Atheta fungi (Gravenhorst, 1806)	species	INTR	Borges, P. A.V.	2017
DTP Collection_187	Palearctic	Portugal	Azores	Terceira	Praia da Vitória	Paul da Praia Vitória	Paul da Praia Vitória- Margins; PPV-T200	38°44’06.44’’N, 27°03’36.21’’W	38.735	-27.06	WGS84	6	10	2017-08-23	Day/Night	Pitfall	sample 26	na	Pimentel, C.	1				1	Animalia	Arthropoda	Insecta	Coleoptera	Staphylinidae	Atheta	fungi		Atheta fungi	(Gravenhorst, 1806)	Atheta fungi (Gravenhorst, 1806)	species	INTR	Borges, P. A.V.	2017
DTP Collection_494	Palearctic	Portugal	Azores	Terceira	Praia da Vitória	Paul do Belo Jardim	Paul do Belo Jardim - Margins; PBJ-T203	38°42’47.95’’N, 27°03’40.93’’W	38.7134	-27.0616	WGS84	5	10	2017-08-16	Day/Night	Pitfall	sample 16	na	Pimentel, C.	1				1	Animalia	Arthropoda	Insecta	Coleoptera	Staphylinidae	Atheta	fungi		Atheta fungi	(Gravenhorst, 1806)	Atheta fungi (Gravenhorst, 1806)	species	INTR	Borges, P. A.V.	2017
DTP Collection_535	Palearctic	Portugal	Azores	Terceira	Praia da Vitória	Paul do Belo Jardim	Paul do Belo Jardim - Margins; PBJ-T203	38°42’47.95’’N, 27°03’40.93’’W	38.7134	-27.0616	WGS84	5	10	2016-09-07	Day/Night	Pitfall	sample 15	na	Pimentel, C.	2				2	Animalia	Arthropoda	Insecta	Coleoptera	Staphylinidae	Atheta	fungi		Atheta fungi	(Gravenhorst, 1806)	Atheta fungi (Gravenhorst, 1806)	species	INTR	Borges, P. A.V.	2016
DTP Collection_574	Palearctic	Portugal	Azores	Terceira	Praia da Vitória	Paul do Belo Jardim	Paul do Belo Jardim - Margins; PBJ-T203	38°42’47.95’’N, 27°03’40.93’’W	38.7134	-27.0616	WGS84	5	10	2016-09-07	Day/Night	Pitfall	sample 14	na	Pimentel, C.	1				1	Animalia	Arthropoda	Insecta	Coleoptera	Staphylinidae	Atheta	fungi		Atheta fungi	(Gravenhorst, 1806)	Atheta fungi (Gravenhorst, 1806)	species	INTR	Borges, P. A.V.	2016
DTP Collection_670	Palearctic	Portugal	Azores	Terceira	Praia da Vitória	Paul da Praia Vitória	Paul da Praia Vitória- Margins; PPV-T200	38°44’06.44’’N, 27°03’36.21’’W	38.735	-27.06	WGS84	6	10	2017-08-23	Day/Night	Pitfall	sample 12	na	Pimentel, C.	1				1	Animalia	Arthropoda	Insecta	Coleoptera	Staphylinidae	Atheta	fungi		Atheta fungi	(Gravenhorst, 1806)	Atheta fungi (Gravenhorst, 1806)	species	INTR	Borges, P. A.V.	2017
DTP Collection_1719	Palearctic	Portugal	Azores	Terceira	Praia da Vitória	Paul da Pedreira	Paul da Pedreira; PPCP-T202	38°42’13.09’’N; 27°02’46.37’’W	38.7043	-27.0465	WGS84	3	10	2016-08-30	Day/Night	Pitfall	sample 05	na	Pimentel, C.	3				3	Animalia	Arthropoda	Insecta	Coleoptera	Staphylinidae	Atheta	fungi		Atheta fungi	(Gravenhorst, 1806)	Atheta fungi (Gravenhorst, 1806)	species	INTR	Borges, P. A.V.	2016
DTP Collection_1720	Palearctic	Portugal	Azores	Terceira	Praia da Vitória	Paul do Belo Jardim	Paul do Belo Jardim - Margins; PBJ-T203	38°42’47.95’’N, 27°03’40.93’’W	38.7134	-27.0616	WGS84	5	10	2016-09-07	Day/Night	Pitfall	sample 05	na	Pimentel, C.	2				2	Animalia	Arthropoda	Insecta	Coleoptera	Staphylinidae	Atheta	fungi		Atheta fungi	(Gravenhorst, 1806)	Atheta fungi (Gravenhorst, 1806)	species	INTR	Borges, P. A.V.	2016
DTP Collection_2774	Palearctic	Portugal	Azores	Terceira	Praia da Vitória	Paul da Praia Vitória	Paul Praia Vitória - Cerrado São Lazaro; PPV-T205	38°44’06.44’’N, 27°03’36.21’’W	38.735	-27.06	WGS84	6	10	2017-08-23	Day/Night	Pitfall	sample 02	na	Pimentel, C.	1				1	Animalia	Arthropoda	Insecta	Coleoptera	Staphylinidae	Atheta	fungi		Atheta fungi	(Gravenhorst, 1806)	Atheta fungi (Gravenhorst, 1806)	species	INTR	Borges, P. A.V.	2017
DTP Collection_2261	Palearctic	Portugal	Azores	Terceira	Praia da Vitória	Paul da Pedreira	Paul da Pedreira; PPCP-T202	38°42’13.09’’N; 27°02’46.37’’W	38.7043	-27.0465	WGS84	3	10	2017-06-28	Day	Beating	sample 03	Erica azorica	Pimentel, C.				1	1	Animalia	Arthropoda	Insecta	Psocoptera	Psocidae	Atlantopsocus	adustus		Atlantopsocus adustus	(Hagen, 1865)	Atlantopsocus adustus (Hagen, 1865)	species	NAT	Borges, P. A.V.	2017
DTP Collection_2644	Palearctic	Portugal	Azores	Terceira	Praia da Vitória	Paul da Pedreira	Paul da Pedreira; PPCP-T202	38°42’13.09’’N; 27°02’46.37’’W	38.7043	-27.0465	WGS84	3	10	2017-06-21	Night	Beating	sample 02	na	Borges, P.A.V.	1			1	2	Animalia	Arthropoda	Insecta	Psocoptera	Psocidae	Atlantopsocus	adustus		Atlantopsocus adustus	(Hagen, 1865)	Atlantopsocus adustus (Hagen, 1865)	species	NAT	Borges, P. A.V.	2017
DTP Collection_273	Palearctic	Portugal	Azores	Terceira	Praia da Vitória	Paul do Belo Jardim	Paul do Belo Jardim - Margins; PBJ-T203	38°42’47.95’’N, 27°03’40.93’’W	38.7134	-27.0616	WGS84	5	10	2017-08-16	Day/Night	Pitfall	sample 23	na	Pimentel, C.			1		1	Animalia	Arthropoda	Insecta	Lepidoptera	Noctuidae	Autographa	gamma		Autographa gamma	(Linnaeus, 1758)	Autographa gamma (Linnaeus, 1758)	species	NAT	Borges, P. A.V.	2017
DTP Collection_3191	Palearctic	Portugal	Azores	Terceira	Praia da Vitória	Paul do Belo Jardim	Paul do Belo Jardim - Margins; PBJ-T203	38°42’47.95’’N, 27°03’40.93’’W	38.7134	-27.0616	WGS84	5	10	2017-08-30	Night	Beating	sample 01	na	Borges, P.A.V.	2			2	4	Animalia	Arthropoda	Insecta	Lepidoptera	Noctuidae	Autographa	gamma		Autographa gamma	(Linnaeus, 1758)	Autographa gamma (Linnaeus, 1758)	species	NAT	Borges, P. A.V.	2017
DTP Collection_1960	Palearctic	Portugal	Azores	Terceira	Praia da Vitória	Paul da Praia Vitória	Paul Praia Vitória - Cerrado São Lazaro; PPV-T205	38°44’06.44’’N, 27°03’36.21’’W	38.735	-27.06	WGS84	6	10	2017-08-23	Day/Night	Pitfall	sample 04	na	Pimentel, C.	3				3	Animalia	Arthropoda	Insecta	Coleoptera	Carabidae	Bembidion	semipunctatum		Bembidion semipunctatum	(Donovan, 1806)	Bembidion semipunctatum (Donovan, 1806)	species	NAT	Borges, P. A.V.	2017
DTP Collection_2300	Palearctic	Portugal	Azores	Terceira	Praia da Vitória	Paul da Pedreira	Paul da Pedreira; PPCP-T202	38°42’13.09’’N; 27°02’46.37’’W	38.7043	-27.0465	WGS84	3	10	2017-06-30	Day/Night	Pitfall	sample 03	na	Pimentel, C.	1				1	Animalia	Arthropoda	Insecta	Coleoptera	Carabidae	Bembidion	semipunctatum		Bembidion semipunctatum	(Donovan, 1806)	Bembidion semipunctatum (Donovan, 1806)	species	NAT	Borges, P. A.V.	2017
DTP Collection_2301	Palearctic	Portugal	Azores	Terceira	Praia da Vitória	Paul da Praia Vitória	Paul Praia Vitória - Cerrado São Lazaro; PPV-T205	38°44’06.44’’N, 27°03’36.21’’W	38.735	-27.06	WGS84	6	10	2017-08-23	Day/Night	Pitfall	sample 03	na	Pimentel, C.	7				7	Animalia	Arthropoda	Insecta	Coleoptera	Carabidae	Bembidion	semipunctatum		Bembidion semipunctatum	(Donovan, 1806)	Bembidion semipunctatum (Donovan, 1806)	species	NAT	Borges, P. A.V.	2017
DTP Collection_2704	Palearctic	Portugal	Azores	Terceira	Praia da Vitória	Paul da Praia Vitória	Paul Praia Vitória - Cerrado São Lazaro; PPV-T205	38°44’06.44’’N, 27°03’36.21’’W	38.735	-27.06	WGS84	6	10	2017-08-23	Day/Night	Pitfall	sample 02	na	Pimentel, C.	17				17	Animalia	Arthropoda	Insecta	Coleoptera	Carabidae	Bembidion	semipunctatum		Bembidion semipunctatum	(Donovan, 1806)	Bembidion semipunctatum (Donovan, 1806)	species	NAT	Borges, P. A.V.	2017
DTP Collection_3103	Palearctic	Portugal	Azores	Terceira	Praia da Vitória	Paul da Pedreira	Paul da Pedreira; PPCP-T202	38°42’13.09’’N; 27°02’46.37’’W	38.7043	-27.0465	WGS84	3	10	2017-06-30	Day/Night	Pitfall	sample 01	na	Pimentel, C.	1				1	Animalia	Arthropoda	Insecta	Coleoptera	Carabidae	Bembidion	semipunctatum		Bembidion semipunctatum	(Donovan, 1806)	Bembidion semipunctatum (Donovan, 1806)	species	NAT	Borges, P. A.V.	2017
DTP Collection_1933	Palearctic	Portugal	Azores	Terceira	Praia da Vitória	Paul da Praia Vitória	Paul da Praia Vitória- Margins; PPV-T200	38°44’06.44’’N, 27°03’36.21’’W	38.735	-27.06	WGS84	6	10	2017-08-31	Night	Sweeping	sample 04	na	Brito, M.	1				1	Animalia	Arthropoda	Insecta	Hemiptera	Lygaeidae	Beosus	maritimus		Beosus maritimus	(Scopoli, 1763)	Beosus maritimus (Scopoli, 1763)	species	NAT	Borges, P. A.V.	2017
DTP Collection_1332	Palearctic	Portugal	Azores	Terceira	Praia da Vitória	Paul do Belo Jardim	Paul do Belo Jardim - Margins; PBJ-T203	38°42’47.95’’N, 27°03’40.93’’W	38.7134	-27.0616	WGS84	5	10	2017-08-03	Day	Beating	sample 07	Arundo donax	Pimentel, C.	1				1	Animalia	Arthropoda	Insecta	Psocoptera	Epipsocidae	Bertkauia	lucifuga		Bertkauia lucifuga	(Rambur, 1842)	Bertkauia lucifuga (Rambur, 1842)	species	NAT	Borges, P. A.V.	2017
DTP Collection_2027	Palearctic	Portugal	Azores	Terceira	Praia da Vitória	Paul do Belo Jardim	Paul do Belo Jardim - Margins; PBJ-T203	38°42’47.95’’N, 27°03’40.93’’W	38.7134	-27.0616	WGS84	5	10	2017-08-30	Night	Active aerial searching	sample 04	na	Gabriel, R.	1				1	Animalia	Arthropoda	Insecta	Lepidoptera	Blastobasidae	Blastobasis	marrocanella		Blastobasis marrocanella	Amsel, 1952	Blastobasis marrocanella Amsel, 1952	species	NAT	Borges, P. A.V.	2017
DTP Collection_2028	Palearctic	Portugal	Azores	Terceira	Praia da Vitória	Paul do Belo Jardim	Paul do Belo Jardim - Margins; PBJ-T203	38°42’47.95’’N, 27°03’40.93’’W	38.7134	-27.0616	WGS84	5	10	2017-08-30	Night	Sweeping	sample 04	na	Gabriel, R.	4				4	Animalia	Arthropoda	Insecta	Lepidoptera	Blastobasidae	Blastobasis	marrocanella		Blastobasis marrocanella	Amsel, 1952	Blastobasis marrocanella Amsel, 1952	species	NAT	Borges, P. A.V.	2017
DTP Collection_2370	Palearctic	Portugal	Azores	Terceira	Praia da Vitória	Paul da Praia Vitória	Paul da Praia Vitória- Margins; PPV-T200	38°44’06.44’’N, 27°03’36.21’’W	38.735	-27.06	WGS84	6	10	2017-08-31	Night	Sweeping	sample 03	na	Gabriel, R.	1				1	Animalia	Arthropoda	Insecta	Lepidoptera	Blastobasidae	Blastobasis	marrocanella		Blastobasis marrocanella	Amsel, 1952	Blastobasis marrocanella Amsel, 1952	species	NAT	Borges, P. A.V.	2017
DTP Collection_2371	Palearctic	Portugal	Azores	Terceira	Praia da Vitória	Paul da Pedreira	Paul da Pedreira; PPCP-T202	38°42’13.09’’N; 27°02’46.37’’W	38.7043	-27.0465	WGS84	3	10	2016-06-21	Night	Sweeping	sample 03	na	Brito, M.	2				2	Animalia	Arthropoda	Insecta	Lepidoptera	Blastobasidae	Blastobasis	marrocanella		Blastobasis marrocanella	Amsel, 1952	Blastobasis marrocanella Amsel, 1952	species	NAT	Borges, P. A.V.	2016
DTP Collection_3187	Palearctic	Portugal	Azores	Terceira	Praia da Vitória	Paul do Belo Jardim	Paul do Belo Jardim - Margins; PBJ-T203	38°42’47.95’’N, 27°03’40.93’’W	38.7134	-27.0616	WGS84	5	10	2017-08-30	Night	Beating	sample 01	na	Borges, P.A.V.	1				1	Animalia	Arthropoda	Insecta	Lepidoptera	Blastobasidae	Blastobasis	marrocanella		Blastobasis marrocanella	Amsel, 1952	Blastobasis marrocanella Amsel, 1952	species	NAT	Borges, P. A.V.	2017
DTP Collection_3188	Palearctic	Portugal	Azores	Terceira	Praia da Vitória	Paul da Pedreira	Paul da Pedreira; PPCP-T202	38°42’13.09’’N; 27°02’46.37’’W	38.7043	-27.0465	WGS84	3	10	2017-06-21	Night	Beating	sample 01	na	Pimentel, C.	1				1	Animalia	Arthropoda	Insecta	Lepidoptera	Blastobasidae	Blastobasis	marrocanella		Blastobasis marrocanella	Amsel, 1952	Blastobasis marrocanella Amsel, 1952	species	NAT	Borges, P. A.V.	2017
DTP Collection_61	Palearctic	Portugal	Azores	Terceira	Praia da Vitória	Paul da Pedreira	Paul da Pedreira; PPCP-T202	38°42’13.09’’N; 27°02’46.37’’W	38.7043	-27.0465	WGS84	3	10	2016-08-30	Day/Night	Pitfall	sample 30	na	Pimentel, C.	1				1	Animalia	Arthropoda	Insecta	Coleoptera	Staphylinidae	Bledius	unicornis		Bledius unicornis	(Germar, 1825)	Bledius unicornis (Germar, 1825)	species	INTR	Assing, V.	2017
DTP Collection_153	Palearctic	Portugal	Azores	Terceira	Praia da Vitória	Paul da Pedreira	Paul da Pedreira; PPCP-T202	38°42’13.09’’N; 27°02’46.37’’W	38.7043	-27.0465	WGS84	3	10	2016-08-30	Day/Night	Pitfall	sample 27	na	Pimentel, C.	7				7	Animalia	Arthropoda	Insecta	Coleoptera	Staphylinidae	Bledius	unicornis		Bledius unicornis	(Germar, 1825)	Bledius unicornis (Germar, 1825)	species	INTR	Assing, V.	2017
DTP Collection_188	Palearctic	Portugal	Azores	Terceira	Praia da Vitória	Paul da Pedreira	Paul da Pedreira; PPCP-T202	38°42’13.09’’N; 27°02’46.37’’W	38.7043	-27.0465	WGS84	3	10	2016-08-30	Day/Night	Pitfall	sample 26	na	Pimentel, C.	1				1	Animalia	Arthropoda	Insecta	Coleoptera	Staphylinidae	Bledius	unicornis		Bledius unicornis	(Germar, 1825)	Bledius unicornis (Germar, 1825)	species	INTR	Assing, V.	2017
DTP Collection_310	Palearctic	Portugal	Azores	Terceira	Praia da Vitória	Paul da Pedreira	Paul da Pedreira; PPCP-T202	38°42’13.09’’N; 27°02’46.37’’W	38.7043	-27.0465	WGS84	3	10	2016-08-30	Day/Night	Pitfall	sample 22	na	Pimentel, C.	1				1	Animalia	Arthropoda	Insecta	Coleoptera	Staphylinidae	Bledius	unicornis		Bledius unicornis	(Germar, 1825)	Bledius unicornis (Germar, 1825)	species	INTR	Assing, V.	2017
DTP Collection_3178	Palearctic	Portugal	Azores	Terceira	Praia da Vitória	Paul da Pedreira	Paul da Pedreira; PPCP-T202	38°42’13.09’’N; 27°02’46.37’’W	38.7043	-27.0465	WGS84	3	10	2017-06-30	Day/Night	Pitfall	sample 01	na	Pimentel, C.	3				3	Animalia	Arthropoda	Insecta	Coleoptera	Staphylinidae	Bledius	unicornis		Bledius unicornis	(Germar, 1825)	Bledius unicornis (Germar, 1825)	species	INTR	Assing, V.	2017
DTP Collection_723	Palearctic	Portugal	Azores	Terceira	Praia da Vitória	Paul do Belo Jardim	Paul do Belo Jardim - Margins; PBJ-T203	38°42’47.95’’N, 27°03’40.93’’W	38.7134	-27.0616	WGS84	5	10	2017-08-16	Day/Night	Pitfall	sample 11	na	Pimentel, C.	1				1	Animalia	Arthropoda	Insecta	Coleoptera	Carabidae	Bradycellus	distinctus		Bradycellus distinctus	(Dejean, 1829)	Bradycellus distinctus (Dejean, 1829)	species	INTR	Borges, P. A.V.	2017
DTP Collection_237	Palearctic	Portugal	Azores	Terceira	Praia da Vitória	Paul da Pedreira	Paul da Pedreira; PPCP-T202	38°42’13.09’’N; 27°02’46.37’’W	38.7043	-27.0465	WGS84	3	10	2016-08-30	Day/Night	Pitfall	sample 24	na	Pimentel, C.	1				1	Animalia	Arthropoda	Insecta	Hemiptera	Anthocoridae	Buchananiella	continua		Buchananiella continua	(White, 1880)	Buchananiella continua (White, 1880)	species	INTR	Borges, P. A.V.	2016
DTP Collection_1018	Palearctic	Portugal	Azores	Terceira	Praia da Vitória	Paul da Praia Vitória	Paul da Praia Vitória- Margins; PPV-T200	38°44’06.44’’N, 27°03’36.21’’W	38.735	-27.06	WGS84	6	10	2017-08-09	Day	Beating	sample 09	Morella faya	Pimentel, C.	1				1	Animalia	Arthropoda	Insecta	Hemiptera	Anthocoridae	Buchananiella	continua		Buchananiella continua	(White, 1880)	Buchananiella continua (White, 1880)	species	INTR	Borges, P. A.V.	2017
DTP Collection_1337	Palearctic	Portugal	Azores	Terceira	Praia da Vitória	Paul da Praia Vitória	Paul da Praia Vitória- Margins; PPV-T200	38°44’06.44’’N, 27°03’36.21’’W	38.735	-27.06	WGS84	6	10	2017-08-09	Day	Beating	sample 07	Morella faya	Pimentel, C.	1				1	Animalia	Arthropoda	Insecta	Hemiptera	Anthocoridae	Buchananiella	continua		Buchananiella continua	(White, 1880)	Buchananiella continua (White, 1880)	species	INTR	Borges, P. A.V.	2017
DTP Collection_3047	Palearctic	Portugal	Azores	Terceira	Praia da Vitória	Paul da Pedreira	Paul da Pedreira; PPCP-T202	38°42’13.09’’N; 27°02’46.37’’W	38.7043	-27.0465	WGS84	3	10	2017-06-21	Night	Beating	sample 01	na	Pimentel, C.	17				17	Animalia	Arthropoda	Insecta	Hemiptera	Anthocoridae	Buchananiella	continua		Buchananiella continua	(White, 1880)	Buchananiella continua (White, 1880)	species	INTR	Borges, P. A.V.	2017
DTP Collection_2700	Palearctic	Portugal	Azores	Terceira	Praia da Vitória	Paul do Belo Jardim	Paul do Belo Jardim - Margins; PBJ-T203	38°42’47.95’’N, 27°03’40.93’’W	38.7134	-27.0616	WGS84	5	10	2016-08-08	Day	Beating	sample 02	Arundo donax	Pimentel, C.	1				1	Animalia	Arthropoda	Insecta	Coleoptera	Anobiidae	Calymmaderus	solidus		Calymmaderus solidus	(Kiesenwetter, 1877)	Calymmaderus solidus (Kiesenwetter, 1877)	species	INTR	Borges, P. A.V.	2016
DTP Collection_2845	Palearctic	Portugal	Azores	Terceira	Praia da Vitória	Paul da Praia Vitória	Paul da Praia Vitória- Margins; PPV-T200	38°44’06.44’’N, 27°03’36.21’’W	38.735	-27.06	WGS84	6	10	2017-08-31	Night	Beating	sample 02	na	Borges, P.A.V.	1			7	8	Animalia	Arthropoda	Insecta	Phasmatodea	Phasmatidae	Carausius	morosus		Carausius morosus	(Sinéty, 1901)	Carausius morosus (Sinéty, 1901)	species	INTR	Borges, P. A.V.	2017
DTP Collection_3242	Palearctic	Portugal	Azores	Terceira	Praia da Vitória	Paul da Praia Vitória	Paul da Praia Vitória- Margins; PPV-T200	38°44’06.44’’N, 27°03’36.21’’W	38.735	-27.06	WGS84	6	10	2017-09-06	Day	Sweeping	sample 01	na	Pimentel, C.				1	1	Animalia	Arthropoda	Insecta	Phasmatodea	Phasmatidae	Carausius	morosus		Carausius morosus	(Sinéty, 1901)	Carausius morosus (Sinéty, 1901)	species	INTR	Borges, P. A.V.	2017
DTP Collection_2023	Palearctic	Portugal	Azores	Terceira	Praia da Vitória	Paul da Praia Vitória	Paul da Praia Vitória- Margins; PPV-T200	38°44’06.44’’N, 27°03’36.21’’W	38.735	-27.06	WGS84	6	10	2016-08-26	Day/Night	Pitfall	sample 04	na	Pimentel, C.	1				1	Animalia	Arthropoda	Insecta	Coleoptera	Staphylinidae	Carpelimus	corticinus		Carpelimus corticinus	(Gravenhorst, 1806)	Carpelimus corticinus (Gravenhorst, 1806)	species	NAT	Assing, V.	2017
DTP Collection_2775	Palearctic	Portugal	Azores	Terceira	Praia da Vitória	Paul da Praia Vitória	Paul da Praia Vitória- Margins; PPV-T200	38°44’06.44’’N, 27°03’36.21’’W	38.735	-27.06	WGS84	6	10	2016-08-26	Day/Night	Pitfall	sample 02	na	Pimentel, C.	1				1	Animalia	Arthropoda	Insecta	Coleoptera	Staphylinidae	Carpelimus	corticinus		Carpelimus corticinus	(Gravenhorst, 1806)	Carpelimus corticinus (Gravenhorst, 1806)	species	NAT	Assing, V.	2017
DTP Collection_1218	Palearctic	Portugal	Azores	Terceira	Praia da Vitória	Paul da Praia Vitória	Paul da Praia Vitória- Margins; PPV-T200	38°44’06.44’’N, 27°03’36.21’’W	38.735	-27.06	WGS84	6	10	2017-08-23	Day/Night	Pitfall	sample 08	na	Pimentel, C.	1				1	Animalia	Arthropoda	Insecta	Coleoptera	Staphylinidae	Carpelimus	zealandicus		Carpelimus zealandicus	(Sharp, 1900)	Carpelimus zealandicus (Sharp, 1900)	species	INTR	Assing, V.	2017
DTP Collection_1054	Palearctic	Portugal	Azores	Terceira	Praia da Vitória	Paul do Belo Jardim	Paul do Belo Jardim - Margins; PBJ-T203	38°42’47.95’’N, 27°03’40.93’’W	38.7134	-27.0616	WGS84	5	10	2016-08-08	Day	Beating	sample 09	Arundo donax	Pimentel, C.	1				1	Animalia	Arthropoda	Insecta	Coleoptera	Lathridiidae	Cartodere	bifasciata		Cartodere bifasciata	Reitter, 1877	Cartodere bifasciata Reitter, 1877	species	INTR	Borges, P. A.V.	2016
DTP Collection_214	Palearctic	Portugal	Azores	Terceira	Praia da Vitória	Paul da Pedreira	Paul da Pedreira; PPCP-T202	38°42’13.09’’N; 27°02’46.37’’W	38.7043	-27.0465	WGS84	3	10	2016-08-30	Day/Night	Pitfall	sample 25	na	Pimentel, C.	1				1	Animalia	Arthropoda	Insecta	Coleoptera	Hydrophilidae	Cercyon	haemorrhoidalis		Cercyon haemorrhoidalis	(Fabricius, 1775)	Cercyon haemorrhoidalis (Fabricius, 1775)	species	INTR	Borges, P. A.V.	2016
DTP Collection_243	Palearctic	Portugal	Azores	Terceira	Praia da Vitória	Paul da Pedreira	Paul da Pedreira; PPCP-T202	38°42’13.09’’N; 27°02’46.37’’W	38.7043	-27.0465	WGS84	3	10	2016-08-30	Day/Night	Pitfall	sample 24	na	Pimentel, C.	1				1	Animalia	Arthropoda	Insecta	Coleoptera	Hydrophilidae	Cercyon	haemorrhoidalis		Cercyon haemorrhoidalis	(Fabricius, 1775)	Cercyon haemorrhoidalis (Fabricius, 1775)	species	INTR	Borges, P. A.V.	2016
DTP Collection_1206	Palearctic	Portugal	Azores	Terceira	Praia da Vitória	Paul da Praia Vitória	Paul da Praia Vitória- Margins; PPV-T200	38°44’06.44’’N, 27°03’36.21’’W	38.735	-27.06	WGS84	6	10	2017-08-23	Day/Night	Pitfall	sample 08	na	Pimentel, C.	1				1	Animalia	Arthropoda	Insecta	Coleoptera	Hydrophilidae	Cercyon	haemorrhoidalis		Cercyon haemorrhoidalis	(Fabricius, 1775)	Cercyon haemorrhoidalis (Fabricius, 1775)	species	INTR	Borges, P. A.V.	2017
DTP Collection_1705	Palearctic	Portugal	Azores	Terceira	Praia da Vitória	Paul da Pedreira	Paul da Pedreira; PPCP-T202	38°42’13.09’’N; 27°02’46.37’’W	38.7043	-27.0465	WGS84	3	10	2016-08-30	Day/Night	Pitfall	sample 05	na	Pimentel, C.	1				1	Animalia	Arthropoda	Insecta	Coleoptera	Hydrophilidae	Cercyon	haemorrhoidalis		Cercyon haemorrhoidalis	(Fabricius, 1775)	Cercyon haemorrhoidalis (Fabricius, 1775)	species	INTR	Borges, P. A.V.	2016
DTP Collection_754	Palearctic	Portugal	Azores	Terceira	Praia da Vitória	Paul da Praia Vitória	Paul da Praia Vitória- Margins; PPV-T200	38°44’06.44’’N, 27°03’36.21’’W	38.735	-27.06	WGS84	6	10	2016-08-30	Day	Beating	sample 10	Morella faya	Pimentel, C.				1	1	Animalia	Arthropoda	Arachnida	Araneae	Clubionidae	Cheiracanthium	mildei		Cheiracanthium mildei	L. Koch, 1864	Cheiracanthium mildei L. Koch, 1864	species	INTR	Crespo, L.	2016
DTP Collection_1108	Palearctic	Portugal	Azores	Terceira	Praia da Vitória	Paul do Belo Jardim	Paul do Belo Jardim - Margins; PBJ-T203	38°42’47.95’’N, 27°03’40.93’’W	38.7134	-27.0616	WGS84	5	10	2016-08-08	Day	Beating	sample 08	Arundo donax	Pimentel, C.				1	1	Animalia	Arthropoda	Arachnida	Araneae	Clubionidae	Cheiracanthium	mildei		Cheiracanthium mildei	L. Koch, 1864	Cheiracanthium mildei L. Koch, 1864	species	INTR	Crespo, L.	2016
DTP Collection_1125	Palearctic	Portugal	Azores	Terceira	Praia da Vitória	Paul da Praia Vitória	Paul da Praia Vitória- Margins; PPV-T200	38°44’06.44’’N, 27°03’36.21’’W	38.735	-27.06	WGS84	6	10	2017-08-09	Day	Beating	sample 08	Arundo donax	Pimentel, C.				1	1	Animalia	Arthropoda	Arachnida	Araneae	Eutichuridae	Cheiracanthium	mildei		Cheiracanthium mildei	L. Koch, 1864	Cheiracanthium mildei L. Koch, 1864	species	INTR	Crespo, L.	2017
DTP Collection_1272	Palearctic	Portugal	Azores	Terceira	Praia da Vitória	Paul da Praia Vitória	Paul da Praia Vitória- Margins; PPV-T200	38°44’06.44’’N, 27°03’36.21’’W	38.735	-27.06	WGS84	6	10	2017-08-09	Day	Beating	sample 07	Morella faya	Pimentel, C.				1	1	Animalia	Arthropoda	Arachnida	Araneae	Eutichuridae	Cheiracanthium	mildei		Cheiracanthium mildei	L. Koch, 1864	Cheiracanthium mildei L. Koch, 1864	species	INTR	Crespo, L.	2017
DTP Collection_1429	Palearctic	Portugal	Azores	Terceira	Praia da Vitória	Paul da Praia Vitória	Paul da Praia Vitória- Margins; PPV-T200	38°44’06.44’’N, 27°03’36.21’’W	38.735	-27.06	WGS84	6	10	2017-08-09	Day	Beating	sample 06	Morella faya	Pimentel, C.				2	2	Animalia	Arthropoda	Arachnida	Araneae	Eutichuridae	Cheiracanthium	mildei		Cheiracanthium mildei	L. Koch, 1864	Cheiracanthium mildei L. Koch, 1864	species	INTR	Crespo, L.	2017
DTP Collection_1583	Palearctic	Portugal	Azores	Terceira	Praia da Vitória	Paul da Praia Vitória	Paul da Praia Vitória- Margins; PPV-T200	38°44’06.44’’N, 27°03’36.21’’W	38.735	-27.06	WGS84	6	10	2016-08-30	Day	Beating	sample 05	Morella faya	Pimentel, C.				1	1	Animalia	Arthropoda	Arachnida	Araneae	Clubionidae	Cheiracanthium	mildei		Cheiracanthium mildei	L. Koch, 1864	Cheiracanthium mildei L. Koch, 1864	species	INTR	Crespo, L.	2016
DTP Collection_1777	Palearctic	Portugal	Azores	Terceira	Praia da Vitória	Paul da Praia Vitória	Paul da Praia Vitória- Margins; PPV-T200	38°44’06.44’’N, 27°03’36.21’’W	38.735	-27.06	WGS84	6	10	2016-08-30	Day	Beating	sample 04	Morella faya	Pimentel, C.				1	1	Animalia	Arthropoda	Arachnida	Araneae	Clubionidae	Cheiracanthium	mildei		Cheiracanthium mildei	L. Koch, 1864	Cheiracanthium mildei L. Koch, 1864	species	INTR	Crespo, L.	2016
DTP Collection_1778	Palearctic	Portugal	Azores	Terceira	Praia da Vitória	Paul da Praia Vitória	Paul da Praia Vitória- Margins; PPV-T200	38°44’06.44’’N, 27°03’36.21’’W	38.735	-27.06	WGS84	6	10	2016-09-01	Night	Active aerial searching	sample 04	na	Pimentel, C.				4	4	Animalia	Arthropoda	Arachnida	Araneae	Clubionidae	Cheiracanthium	mildei		Cheiracanthium mildei	L. Koch, 1864	Cheiracanthium mildei L. Koch, 1864	species	INTR	Crespo, L.	2016
DTP Collection_1807	Palearctic	Portugal	Azores	Terceira	Praia da Vitória	Paul da Praia Vitória	Paul da Praia Vitória- Margins; PPV-T200	38°44’06.44’’N, 27°03’36.21’’W	38.735	-27.06	WGS84	6	10	2017-08-09	Day	Beating	sample 04	Morella faya	Pimentel, C.				1	1	Animalia	Arthropoda	Arachnida	Araneae	Eutichuridae	Cheiracanthium	mildei		Cheiracanthium mildei	L. Koch, 1864	Cheiracanthium mildei L. Koch, 1864	species	INTR	Crespo, L.	2017
DTP Collection_1808	Palearctic	Portugal	Azores	Terceira	Praia da Vitória	Paul da Praia Vitória	Paul da Praia Vitória- Margins; PPV-T200	38°44’06.44’’N, 27°03’36.21’’W	38.735	-27.06	WGS84	6	10	2017-08-31	Night	Active aerial searching	sample 04	na	Gabriel, R.				3	3	Animalia	Arthropoda	Arachnida	Araneae	Eutichuridae	Cheiracanthium	mildei		Cheiracanthium mildei	L. Koch, 1864	Cheiracanthium mildei L. Koch, 1864	species	INTR	Crespo, L.	2017
DTP Collection_1809	Palearctic	Portugal	Azores	Terceira	Praia da Vitória	Paul da Praia Vitória	Paul da Praia Vitória- Margins; PPV-T200	38°44’06.44’’N, 27°03’36.21’’W	38.735	-27.06	WGS84	6	10	2017-08-31	Night	Sweeping	sample 04	na	Brito, M.				8	8	Animalia	Arthropoda	Arachnida	Araneae	Eutichuridae	Cheiracanthium	mildei		Cheiracanthium mildei	L. Koch, 1864	Cheiracanthium mildei L. Koch, 1864	species	INTR	Crespo, L.	2017
DTP Collection_1810	Palearctic	Portugal	Azores	Terceira	Praia da Vitória	Paul do Belo Jardim	Paul do Belo Jardim - Margins; PBJ-T203	38°42’47.95’’N, 27°03’40.93’’W	38.7134	-27.0616	WGS84	5	10	2017-08-30	Night	Active aerial searching	sample 04	na	Gabriel, R.				1	1	Animalia	Arthropoda	Arachnida	Araneae	Eutichuridae	Cheiracanthium	mildei		Cheiracanthium mildei	L. Koch, 1864	Cheiracanthium mildei L. Koch, 1864	species	INTR	Crespo, L.	2017
DTP Collection_2107	Palearctic	Portugal	Azores	Terceira	Praia da Vitória	Paul da Praia Vitória	Paul da Praia Vitória- Margins; PPV-T200	38°44’06.44’’N, 27°03’36.21’’W	38.735	-27.06	WGS84	6	10	2016-08-30	Day	Beating	sample 03	Morella faya	Pimentel, C.				2	2	Animalia	Arthropoda	Arachnida	Araneae	Clubionidae	Cheiracanthium	mildei		Cheiracanthium mildei	L. Koch, 1864	Cheiracanthium mildei L. Koch, 1864	species	INTR	Crespo, L.	2016
DTP Collection_2108	Palearctic	Portugal	Azores	Terceira	Praia da Vitória	Paul da Praia Vitória	Paul da Praia Vitória- Margins; PPV-T200	38°44’06.44’’N, 27°03’36.21’’W	38.735	-27.06	WGS84	6	10	2016-08-30	Day	Beating	sample 03	Arundo donax	Pimentel, C.				1	1	Animalia	Arthropoda	Arachnida	Araneae	Clubionidae	Cheiracanthium	mildei		Cheiracanthium mildei	L. Koch, 1864	Cheiracanthium mildei L. Koch, 1864	species	INTR	Crespo, L.	2016
DTP Collection_2109	Palearctic	Portugal	Azores	Terceira	Praia da Vitória	Paul da Pedreira	Paul da Pedreira; PPCP-T202	38°42’13.09’’N; 27°02’46.37’’W	38.7043	-27.0465	WGS84	3	10	2016-08-31	Night	Active aerial searching	sample 03	na	Gabriel, R.				1	1	Animalia	Arthropoda	Arachnida	Araneae	Clubionidae	Cheiracanthium	mildei		Cheiracanthium mildei	L. Koch, 1864	Cheiracanthium mildei L. Koch, 1864	species	INTR	Crespo, L.	2016
DTP Collection_2110	Palearctic	Portugal	Azores	Terceira	Praia da Vitória	Paul da Praia Vitória	Paul da Praia Vitória- Margins; PPV-T200	38°44’06.44’’N, 27°03’36.21’’W	38.735	-27.06	WGS84	6	10	2016-09-01	Night	Active aerial searching	sample 03	na	Gabriel, R.				5	5	Animalia	Arthropoda	Arachnida	Araneae	Clubionidae	Cheiracanthium	mildei		Cheiracanthium mildei	L. Koch, 1864	Cheiracanthium mildei L. Koch, 1864	species	INTR	Crespo, L.	2016
DTP Collection_2144	Palearctic	Portugal	Azores	Terceira	Praia da Vitória	Paul da Praia Vitória	Paul da Praia Vitória- Margins; PPV-T200	38°44’06.44’’N, 27°03’36.21’’W	38.735	-27.06	WGS84	6	10	2017-08-09	Day	Beating	sample 03	Morella faya	Pimentel, C.				2	2	Animalia	Arthropoda	Arachnida	Araneae	Eutichuridae	Cheiracanthium	mildei		Cheiracanthium mildei	L. Koch, 1864	Cheiracanthium mildei L. Koch, 1864	species	INTR	Crespo, L.	2017
DTP Collection_2145	Palearctic	Portugal	Azores	Terceira	Praia da Vitória	Paul da Praia Vitória	Paul da Praia Vitória- Margins; PPV-T200	38°44’06.44’’N, 27°03’36.21’’W	38.735	-27.06	WGS84	6	10	2017-08-31	Night	Sweeping	sample 03	na	Gabriel, R.				8	8	Animalia	Arthropoda	Arachnida	Araneae	Eutichuridae	Cheiracanthium	mildei		Cheiracanthium mildei	L. Koch, 1864	Cheiracanthium mildei L. Koch, 1864	species	INTR	Crespo, L.	2017
DTP Collection_2146	Palearctic	Portugal	Azores	Terceira	Praia da Vitória	Paul do Belo Jardim	Paul do Belo Jardim - Margins; PBJ-T203	38°42’47.95’’N, 27°03’40.93’’W	38.7134	-27.0616	WGS84	5	10	2017-08-30	Night	Active aerial searching	sample 03	na	Borges, P.A.V.				1	1	Animalia	Arthropoda	Arachnida	Araneae	Eutichuridae	Cheiracanthium	mildei		Cheiracanthium mildei	L. Koch, 1864	Cheiracanthium mildei L. Koch, 1864	species	INTR	Crespo, L.	2017
DTP Collection_2147	Palearctic	Portugal	Azores	Terceira	Praia da Vitória	Paul do Belo Jardim	Paul do Belo Jardim - Margins; PBJ-T203	38°42’47.95’’N, 27°03’40.93’’W	38.7134	-27.0616	WGS84	5	10	2017-08-30	Night	Sweeping	sample 03	na	Brito, M.				1	1	Animalia	Arthropoda	Arachnida	Araneae	Eutichuridae	Cheiracanthium	mildei		Cheiracanthium mildei	L. Koch, 1864	Cheiracanthium mildei L. Koch, 1864	species	INTR	Crespo, L.	2017
DTP Collection_2444	Palearctic	Portugal	Azores	Terceira	Praia da Vitória	Paul da Praia Vitória	Paul da Praia Vitória- Margins; PPV-T200	38°44’06.44’’N, 27°03’36.21’’W	38.735	-27.06	WGS84	6	10	2016-08-30	Day	Beating	sample 02	Morella faya	Pimentel, C.				3	3	Animalia	Arthropoda	Arachnida	Araneae	Clubionidae	Cheiracanthium	mildei		Cheiracanthium mildei	L. Koch, 1864	Cheiracanthium mildei L. Koch, 1864	species	INTR	Crespo, L.	2016
DTP Collection_2445	Palearctic	Portugal	Azores	Terceira	Praia da Vitória	Paul do Belo Jardim	Paul do Belo Jardim - Margins; PBJ-T203	38°42’47.95’’N, 27°03’40.93’’W	38.7134	-27.0616	WGS84	5	10	2016-08-08	Day	Beating	sample 02	Arundo donax	Pimentel, C.				1	1	Animalia	Arthropoda	Arachnida	Araneae	Clubionidae	Cheiracanthium	mildei		Cheiracanthium mildei	L. Koch, 1864	Cheiracanthium mildei L. Koch, 1864	species	INTR	Crespo, L.	2016
DTP Collection_2446	Palearctic	Portugal	Azores	Terceira	Praia da Vitória	Paul da Praia Vitória	Paul da Praia Vitória- Margins; PPV-T200	38°44’06.44’’N, 27°03’36.21’’W	38.735	-27.06	WGS84	6	10	2016-09-01	Night	Active aerial searching	sample 02	na	Borges, P.A.V.				6	6	Animalia	Arthropoda	Arachnida	Araneae	Clubionidae	Cheiracanthium	mildei		Cheiracanthium mildei	L. Koch, 1864	Cheiracanthium mildei L. Koch, 1864	species	INTR	Crespo, L.	2016
DTP Collection_2484	Palearctic	Portugal	Azores	Terceira	Praia da Vitória	Paul da Praia Vitória	Paul da Praia Vitória- Margins; PPV-T200	38°44’06.44’’N, 27°03’36.21’’W	38.735	-27.06	WGS84	6	10	2017-08-31	Night	Beating	sample 02	na	Borges, P.A.V.				7	7	Animalia	Arthropoda	Arachnida	Araneae	Eutichuridae	Cheiracanthium	mildei		Cheiracanthium mildei	L. Koch, 1864	Cheiracanthium mildei L. Koch, 1864	species	INTR	Crespo, L.	2017
DTP Collection_2485	Palearctic	Portugal	Azores	Terceira	Praia da Vitória	Paul da Praia Vitória	Paul da Praia Vitória- Margins; PPV-T200	38°44’06.44’’N, 27°03’36.21’’W	38.735	-27.06	WGS84	6	10	2017-08-31	Night	Active aerial searching	sample 02	na	Brito, M.				2	2	Animalia	Arthropoda	Arachnida	Araneae	Eutichuridae	Cheiracanthium	mildei		Cheiracanthium mildei	L. Koch, 1864	Cheiracanthium mildei L. Koch, 1864	species	INTR	Crespo, L.	2017
DTP Collection_2486	Palearctic	Portugal	Azores	Terceira	Praia da Vitória	Paul do Belo Jardim	Paul do Belo Jardim - Margins; PBJ-T203	38°42’47.95’’N, 27°03’40.93’’W	38.7134	-27.0616	WGS84	5	10	2017-08-30	Night	Beating	sample 02	na	Pimentel, C.				1	1	Animalia	Arthropoda	Arachnida	Araneae	Eutichuridae	Cheiracanthium	mildei		Cheiracanthium mildei	L. Koch, 1864	Cheiracanthium mildei L. Koch, 1864	species	INTR	Crespo, L.	2017
DTP Collection_2872	Palearctic	Portugal	Azores	Terceira	Praia da Vitória	Paul do Belo Jardim	Paul do Belo Jardim - Margins; PBJ-T203	38°42’47.95’’N, 27°03’40.93’’W	38.7134	-27.0616	WGS84	5	10	2016-08-08	Day	Beating	sample 01	Arundo donax	Pimentel, C.				1	1	Animalia	Arthropoda	Arachnida	Araneae	Clubionidae	Cheiracanthium	mildei		Cheiracanthium mildei	L. Koch, 1864	Cheiracanthium mildei L. Koch, 1864	species	INTR	Crespo, L.	2016
DTP Collection_2901	Palearctic	Portugal	Azores	Terceira	Praia da Vitória	Paul da Praia Vitória	Paul da Praia Vitória- Margins; PPV-T200	38°44’06.44’’N, 27°03’36.21’’W	38.735	-27.06	WGS84	6	10	2017-09-06	Day	Sweeping	sample 01	na	Pimentel, C.				1	1	Animalia	Arthropoda	Arachnida	Araneae	Eutichuridae	Cheiracanthium	mildei		Cheiracanthium mildei	L. Koch, 1864	Cheiracanthium mildei L. Koch, 1864	species	INTR	Crespo, L.	2017
DTP Collection_2902	Palearctic	Portugal	Azores	Terceira	Praia da Vitória	Paul da Praia Vitória	Paul da Praia Vitória- Margins; PPV-T200	38°44’06.44’’N, 27°03’36.21’’W	38.735	-27.06	WGS84	6	10	2017-08-09	Day	Beating	sample 01	Arundo donax	Pimentel, C.				1	1	Animalia	Arthropoda	Arachnida	Araneae	Eutichuridae	Cheiracanthium	mildei		Cheiracanthium mildei	L. Koch, 1864	Cheiracanthium mildei L. Koch, 1864	species	INTR	Crespo, L.	2017
DTP Collection_2903	Palearctic	Portugal	Azores	Terceira	Praia da Vitória	Paul da Praia Vitória	Paul da Praia Vitória- Margins; PPV-T200	38°44’06.44’’N, 27°03’36.21’’W	38.735	-27.06	WGS84	6	10	2017-08-09	Day	Beating	sample 01	Morella faya	Pimentel, C.				7	7	Animalia	Arthropoda	Arachnida	Araneae	Eutichuridae	Cheiracanthium	mildei		Cheiracanthium mildei	L. Koch, 1864	Cheiracanthium mildei L. Koch, 1864	species	INTR	Crespo, L.	2017
DTP Collection_2904	Palearctic	Portugal	Azores	Terceira	Praia da Vitória	Paul da Praia Vitória	Paul da Praia Vitória- Margins; PPV-T200	38°44’06.44’’N, 27°03’36.21’’W	38.735	-27.06	WGS84	6	10	2017-08-31	Night	Beating	sample 01	na	Pimentel, C.				6	6	Animalia	Arthropoda	Arachnida	Araneae	Eutichuridae	Cheiracanthium	mildei		Cheiracanthium mildei	L. Koch, 1864	Cheiracanthium mildei L. Koch, 1864	species	INTR	Crespo, L.	2017
DTP Collection_2905	Palearctic	Portugal	Azores	Terceira	Praia da Vitória	Paul da Praia Vitória	Paul da Praia Vitória- Margins; PPV-T200	38°44’06.44’’N, 27°03’36.21’’W	38.735	-27.06	WGS84	6	10	2017-08-31	Night	Active aerial searching	sample 01	na	Pimentel, C.				2	2	Animalia	Arthropoda	Arachnida	Araneae	Eutichuridae	Cheiracanthium	mildei		Cheiracanthium mildei	L. Koch, 1864	Cheiracanthium mildei L. Koch, 1864	species	INTR	Crespo, L.	2017
DTP Collection_2906	Palearctic	Portugal	Azores	Terceira	Praia da Vitória	Paul do Belo Jardim	Paul do Belo Jardim - Margins; PBJ-T203	38°42’47.95’’N, 27°03’40.93’’W	38.7134	-27.0616	WGS84	5	10	2017-08-30	Night	Beating	sample 01	na	Borges, P.A.V.				11	11	Animalia	Arthropoda	Arachnida	Araneae	Eutichuridae	Cheiracanthium	mildei		Cheiracanthium mildei	L. Koch, 1864	Cheiracanthium mildei L. Koch, 1864	species	INTR	Crespo, L.	2017
DTP Collection_1308	Palearctic	Portugal	Azores	Terceira	Praia da Vitória	Paul do Belo Jardim	Paul do Belo Jardim - Margins; PBJ-T203	38°42’47.95’’N, 27°03’40.93’’W	38.7134	-27.0616	WGS84	5	10	2017-08-16	Day/Night	Pitfall	sample 07	na	Pimentel, C.	1				1	Animalia	Arthropoda	Diplopoda	Julida	Blaniulidae	Choneiulus	palmatus		Choneiulus palmatus	(Nemec, 1895)	Choneiulus palmatus (Nemec, 1895)	species	INTR	Borges, P. A.V.	2017
DTP Collection_1639	Palearctic	Portugal	Azores	Terceira	Praia da Vitória	Paul do Belo Jardim	Paul do Belo Jardim - Margins; PBJ-T203	38°42’47.95’’N, 27°03’40.93’’W	38.7134	-27.0616	WGS84	5	10	2017-08-16	Day/Night	Pitfall	sample 05	na	Pimentel, C.	1				1	Animalia	Arthropoda	Diplopoda	Julida	Blaniulidae	Choneiulus	palmatus		Choneiulus palmatus	(Nemec, 1895)	Choneiulus palmatus (Nemec, 1895)	species	INTR	Borges, P. A.V.	2017
DTP Collection_1961	Palearctic	Portugal	Azores	Terceira	Praia da Vitória	Paul da Praia Vitória	Paul da Praia Vitória- Margins; PPV-T200	38°44’06.44’’N, 27°03’36.21’’W	38.735	-27.06	WGS84	6	10	2017-08-31	Night	Active aerial searching	sample 04	na	Gabriel, R.	1				1	Animalia	Arthropoda	Insecta	Coleoptera	Chrysomelidae	Chrysolina	bankii		Chrysolina bankii	(Fabricius, 1775)	Chrysolina bankii (Fabricius, 1775)	species	NAT	Borges, P. A.V.	2017
DTP Collection_2304	Palearctic	Portugal	Azores	Terceira	Praia da Vitória	Paul da Praia Vitória	Paul da Praia Vitória- Margins; PPV-T200	38°44’06.44’’N, 27°03’36.21’’W	38.735	-27.06	WGS84	6	10	2016-09-01	Night	Active aerial searching	sample 03	na	Gabriel, R.	3				3	Animalia	Arthropoda	Insecta	Coleoptera	Chrysomelidae	Chrysolina	bankii		Chrysolina bankii	(Fabricius, 1775)	Chrysolina bankii (Fabricius, 1775)	species	NAT	Borges, P. A.V.	2016
DTP Collection_2305	Palearctic	Portugal	Azores	Terceira	Praia da Vitória	Paul da Praia Vitória	Paul da Praia Vitória- Margins; PPV-T200	38°44’06.44’’N, 27°03’36.21’’W	38.735	-27.06	WGS84	6	10	2017-08-31	Night	Sweeping	sample 03	na	Gabriel, R.	1				1	Animalia	Arthropoda	Insecta	Coleoptera	Chrysomelidae	Chrysolina	bankii		Chrysolina bankii	(Fabricius, 1775)	Chrysolina bankii (Fabricius, 1775)	species	NAT	Borges, P. A.V.	2017
DTP Collection_2705	Palearctic	Portugal	Azores	Terceira	Praia da Vitória	Paul da Pedreira	Paul da Pedreira; PPCP-T202	38°42’13.09’’N; 27°02’46.37’’W	38.7043	-27.0465	WGS84	3	10	2017-06-21	Night	Active aerial searching	sample 02	na	Brito, M.	1				1	Animalia	Arthropoda	Insecta	Coleoptera	Chrysomelidae	Chrysolina	bankii		Chrysolina bankii	(Fabricius, 1775)	Chrysolina bankii (Fabricius, 1775)	species	NAT	Borges, P. A.V.	2017
DTP Collection_3106	Palearctic	Portugal	Azores	Terceira	Praia da Vitória	Paul da Praia Vitória	Paul da Praia Vitória- Margins; PPV-T200	38°44’06.44’’N, 27°03’36.21’’W	38.735	-27.06	WGS84	6	10	2016-09-01	Night	Active aerial searching	sample 01	na	Brito, M.	1				1	Animalia	Arthropoda	Insecta	Coleoptera	Chrysomelidae	Chrysolina	bankii		Chrysolina bankii	(Fabricius, 1775)	Chrysolina bankii (Fabricius, 1775)	species	NAT	Borges, P. A.V.	2016
DTP Collection_3107	Palearctic	Portugal	Azores	Terceira	Praia da Vitória	Paul da Praia Vitória	Paul da Praia Vitória- Margins; PPV-T200	38°44’06.44’’N, 27°03’36.21’’W	38.735	-27.06	WGS84	6	10	2017-09-06	Day	Sweeping	sample 01	na	Pimentel, C.	3				3	Animalia	Arthropoda	Insecta	Coleoptera	Chrysomelidae	Chrysolina	bankii		Chrysolina bankii	(Fabricius, 1775)	Chrysolina bankii (Fabricius, 1775)	species	NAT	Borges, P. A.V.	2017
DTP Collection_3108	Palearctic	Portugal	Azores	Terceira	Praia da Vitória	Paul da Praia Vitória	Paul da Praia Vitória- Margins; PPV-T200	38°44’06.44’’N, 27°03’36.21’’W	38.735	-27.06	WGS84	6	10	2017-08-31	Night	Beating	sample 01	na	Pimentel, C.	2				2	Animalia	Arthropoda	Insecta	Coleoptera	Chrysomelidae	Chrysolina	bankii		Chrysolina bankii	(Fabricius, 1775)	Chrysolina bankii (Fabricius, 1775)	species	NAT	Borges, P. A.V.	2017
DTP Collection_222	Palearctic	Portugal	Azores	Terceira	Praia da Vitória	Paul do Belo Jardim	Paul do Belo Jardim - Margins; PBJ-T203	38°42’47.95’’N, 27°03’40.93’’W	38.7134	-27.0616	WGS84	5	10	2016-09-07	Day/Night	Pitfall	sample 24	na	Pimentel, C.	1				1	Animalia	Arthropoda	Arachnida	Pseudoscorpiones	Chthoniidae	Chthonius	tetrachelatus		Chthonius tetrachelatus	(Preyssler, 1790)	Chthonius tetrachelatus (Preyssler, 1790)	species	INTR	Borges, P. A.V.	2016
DTP Collection_1755	Palearctic	Portugal	Azores	Terceira	Praia da Vitória	Paul do Belo Jardim	Paul do Belo Jardim - Margins; PBJ-T203	38°42’47.95’’N, 27°03’40.93’’W	38.7134	-27.0616	WGS84	5	10	2017-08-16	Day/Night	Pitfall	sample 04	na	Pimentel, C.	1				1	Animalia	Arthropoda	Arachnida	Pseudoscorpiones	Chthoniidae	Chthonius	tetrachelatus		Chthonius tetrachelatus	(Preyssler, 1790)	Chthonius tetrachelatus (Preyssler, 1790)	species	INTR	Borges, P. A.V.	2017
DTP Collection_1936	Palearctic	Portugal	Azores	Terceira	Praia da Vitória	Paul da Pedreira	Paul da Pedreira; PPCP-T202	38°42’13.09’’N; 27°02’46.37’’W	38.7043	-27.0465	WGS84	3	10	2017-06-21	Night	Active aerial searching	sample 04	na	Gabriel, R.	1				1	Animalia	Arthropoda	Insecta	Hemiptera	Miridae	Closterotomus	norwegicus		Closterotomus norwegicus	(Gmelin, 1790)	Closterotomus norwegicus (Gmelin, 1790)	species	NAT	Borges, P. A.V.	2017
DTP Collection_755	Palearctic	Portugal	Azores	Terceira	Praia da Vitória	Paul da Pedreira	Paul da Pedreira; PPCP-T202	38°42’13.09’’N; 27°02’46.37’’W	38.7043	-27.0465	WGS84	3	10	2016-08-30	Day	Beating	sample 10	Arundo donax	Pimentel, C.				1	1	Animalia	Arthropoda	Arachnida	Araneae	Clubionidae	Clubiona	decora		Clubiona decora	Blackwall, 1859	Clubiona decora Blackwall, 1859	species	NAT	Borges, P. A.V.	2016
DTP Collection_756	Palearctic	Portugal	Azores	Terceira	Praia da Vitória	Paul da Pedreira	Paul da Pedreira; PPCP-T202	38°42’13.09’’N; 27°02’46.37’’W	38.7043	-27.0465	WGS84	3	10	2016-08-30	Day	Beating	sample 10	Morella faya	Pimentel, C.				1	1	Animalia	Arthropoda	Arachnida	Araneae	Clubionidae	Clubiona	decora		Clubiona decora	Blackwall, 1859	Clubiona decora Blackwall, 1859	species	NAT	Borges, P. A.V.	2016
DTP Collection_757	Palearctic	Portugal	Azores	Terceira	Praia da Vitória	Paul do Belo Jardim	Paul do Belo Jardim - Margins; PBJ-T203	38°42’47.95’’N, 27°03’40.93’’W	38.7134	-27.0616	WGS84	5	10	2017-08-03	Day	Beating	sample 10	Arundo donax	Pimentel, C.				1	1	Animalia	Arthropoda	Arachnida	Araneae	Clubionidae	Clubiona	decora		Clubiona decora	Blackwall, 1859	Clubiona decora Blackwall, 1859	species	NAT	Borges, P. A.V.	2017
DTP Collection_932	Palearctic	Portugal	Azores	Terceira	Praia da Vitória	Paul da Praia Vitória	Paul da Praia Vitória- Margins; PPV-T200	38°44’06.44’’N, 27°03’36.21’’W	38.735	-27.06	WGS84	6	10	2016-08-30	Day	Beating	sample 09	Morella faya	Pimentel, C.				2	2	Animalia	Arthropoda	Arachnida	Araneae	Clubionidae	Clubiona	decora		Clubiona decora	Blackwall, 1859	Clubiona decora Blackwall, 1859	species	NAT	Borges, P. A.V.	2016
DTP Collection_933	Palearctic	Portugal	Azores	Terceira	Praia da Vitória	Paul da Praia Vitória	Paul da Praia Vitória- Margins; PPV-T200	38°44’06.44’’N, 27°03’36.21’’W	38.735	-27.06	WGS84	6	10	2016-08-30	Day	Beating	sample 09	Arundo donax	Pimentel, C.				1	1	Animalia	Arthropoda	Arachnida	Araneae	Clubionidae	Clubiona	decora		Clubiona decora	Blackwall, 1859	Clubiona decora Blackwall, 1859	species	NAT	Borges, P. A.V.	2016
DTP Collection_934	Palearctic	Portugal	Azores	Terceira	Praia da Vitória	Paul da Pedreira	Paul da Pedreira; PPCP-T202	38°42’13.09’’N; 27°02’46.37’’W	38.7043	-27.0465	WGS84	3	10	2016-08-30	Day	Beating	sample 09	Arundo donax	Pimentel, C.				1	1	Animalia	Arthropoda	Arachnida	Araneae	Clubionidae	Clubiona	decora		Clubiona decora	Blackwall, 1859	Clubiona decora Blackwall, 1859	species	NAT	Borges, P. A.V.	2016
DTP Collection_935	Palearctic	Portugal	Azores	Terceira	Praia da Vitória	Paul da Praia Vitória	Paul da Praia Vitória- Margins; PPV-T200	38°44’06.44’’N, 27°03’36.21’’W	38.735	-27.06	WGS84	6	10	2017-08-09	Day	Beating	sample 09	Morella faya	Pimentel, C.				6	6	Animalia	Arthropoda	Arachnida	Araneae	Clubionidae	Clubiona	decora		Clubiona decora	Blackwall, 1859	Clubiona decora Blackwall, 1859	species	NAT	Borges, P. A.V.	2017
DTP Collection_936	Palearctic	Portugal	Azores	Terceira	Praia da Vitória	Paul do Belo Jardim	Paul do Belo Jardim - Margins; PBJ-T203	38°42’47.95’’N, 27°03’40.93’’W	38.7134	-27.0616	WGS84	5	10	2017-08-03	Day	Beating	sample 09	Arundo donax	Pimentel, C.		1		4	5	Animalia	Arthropoda	Arachnida	Araneae	Clubionidae	Clubiona	decora		Clubiona decora	Blackwall, 1859	Clubiona decora Blackwall, 1859	species	NAT	Borges, P. A.V.	2017
DTP Collection_1109	Palearctic	Portugal	Azores	Terceira	Praia da Vitória	Paul da Praia Vitória	Paul da Praia Vitória- Margins; PPV-T200	38°44’06.44’’N, 27°03’36.21’’W	38.735	-27.06	WGS84	6	10	2016-08-30	Day	Beating	sample 08	Arundo donax	Pimentel, C.				1	1	Animalia	Arthropoda	Arachnida	Araneae	Clubionidae	Clubiona	decora		Clubiona decora	Blackwall, 1859	Clubiona decora Blackwall, 1859	species	NAT	Borges, P. A.V.	2016
DTP Collection_1110	Palearctic	Portugal	Azores	Terceira	Praia da Vitória	Paul do Belo Jardim	Paul do Belo Jardim - Margins; PBJ-T203	38°42’47.95’’N, 27°03’40.93’’W	38.7134	-27.0616	WGS84	5	10	2016-08-08	Day	Beating	sample 08	Arundo donax	Pimentel, C.				1	1	Animalia	Arthropoda	Arachnida	Araneae	Clubionidae	Clubiona	decora		Clubiona decora	Blackwall, 1859	Clubiona decora Blackwall, 1859	species	NAT	Borges, P. A.V.	2016
DTP Collection_1111	Palearctic	Portugal	Azores	Terceira	Praia da Vitória	Paul da Praia Vitória	Paul da Praia Vitória- Margins; PPV-T200	38°44’06.44’’N, 27°03’36.21’’W	38.735	-27.06	WGS84	6	10	2017-08-09	Day	Beating	sample 08	Arundo donax	Pimentel, C.				1	1	Animalia	Arthropoda	Arachnida	Araneae	Clubionidae	Clubiona	decora		Clubiona decora	Blackwall, 1859	Clubiona decora Blackwall, 1859	species	NAT	Borges, P. A.V.	2017
DTP Collection_1112	Palearctic	Portugal	Azores	Terceira	Praia da Vitória	Paul da Praia Vitória	Paul da Praia Vitória- Margins; PPV-T200	38°44’06.44’’N, 27°03’36.21’’W	38.735	-27.06	WGS84	6	10	2017-08-09	Day	Beating	sample 08	Morella faya	Pimentel, C.			1	7	8	Animalia	Arthropoda	Arachnida	Araneae	Clubionidae	Clubiona	decora		Clubiona decora	Blackwall, 1859	Clubiona decora Blackwall, 1859	species	NAT	Borges, P. A.V.	2017
DTP Collection_1113	Palearctic	Portugal	Azores	Terceira	Praia da Vitória	Paul do Belo Jardim	Paul do Belo Jardim - Margins; PBJ-T203	38°42’47.95’’N, 27°03’40.93’’W	38.7134	-27.0616	WGS84	5	10	2017-08-03	Day	Beating	sample 08	Arundo donax	Pimentel, C.				1	1	Animalia	Arthropoda	Arachnida	Araneae	Clubionidae	Clubiona	decora		Clubiona decora	Blackwall, 1859	Clubiona decora Blackwall, 1859	species	NAT	Borges, P. A.V.	2017
DTP Collection_1114	Palearctic	Portugal	Azores	Terceira	Praia da Vitória	Paul da Pedreira	Paul da Pedreira; PPCP-T202	38°42’13.09’’N; 27°02’46.37’’W	38.7043	-27.0465	WGS84	3	10	2017-06-28	Day	Beating	sample 08	Morella faya	Pimentel, C.				1	1	Animalia	Arthropoda	Arachnida	Araneae	Clubionidae	Clubiona	decora		Clubiona decora	Blackwall, 1859	Clubiona decora Blackwall, 1859	species	NAT	Borges, P. A.V.	2017
DTP Collection_1259	Palearctic	Portugal	Azores	Terceira	Praia da Vitória	Paul da Praia Vitória	Paul da Praia Vitória- Margins; PPV-T200	38°44’06.44’’N, 27°03’36.21’’W	38.735	-27.06	WGS84	6	10	2016-08-30	Day	Beating	sample 07	Arundo donax	Pimentel, C.				5	5	Animalia	Arthropoda	Arachnida	Araneae	Clubionidae	Clubiona	decora		Clubiona decora	Blackwall, 1859	Clubiona decora Blackwall, 1859	species	NAT	Borges, P. A.V.	2016
DTP Collection_1260	Palearctic	Portugal	Azores	Terceira	Praia da Vitória	Paul da Pedreira	Paul da Pedreira; PPCP-T202	38°42’13.09’’N; 27°02’46.37’’W	38.7043	-27.0465	WGS84	3	10	2016-08-30	Day	Beating	sample 07	Morella faya	Pimentel, C.				1	1	Animalia	Arthropoda	Arachnida	Araneae	Clubionidae	Clubiona	decora		Clubiona decora	Blackwall, 1859	Clubiona decora Blackwall, 1859	species	NAT	Borges, P. A.V.	2016
DTP Collection_1261	Palearctic	Portugal	Azores	Terceira	Praia da Vitória	Paul da Praia Vitória	Paul da Praia Vitória- Margins; PPV-T200	38°44’06.44’’N, 27°03’36.21’’W	38.735	-27.06	WGS84	6	10	2017-08-09	Day	Beating	sample 07	Morella faya	Pimentel, C.			1	3	4	Animalia	Arthropoda	Arachnida	Araneae	Clubionidae	Clubiona	decora		Clubiona decora	Blackwall, 1859	Clubiona decora Blackwall, 1859	species	NAT	Borges, P. A.V.	2017
DTP Collection_1262	Palearctic	Portugal	Azores	Terceira	Praia da Vitória	Paul do Belo Jardim	Paul do Belo Jardim - Margins; PBJ-T203	38°42’47.95’’N, 27°03’40.93’’W	38.7134	-27.0616	WGS84	5	10	2017-08-03	Day	Beating	sample 07	Juncus acutus	Pimentel, C.				1	1	Animalia	Arthropoda	Arachnida	Araneae	Clubionidae	Clubiona	decora		Clubiona decora	Blackwall, 1859	Clubiona decora Blackwall, 1859	species	NAT	Borges, P. A.V.	2017
DTP Collection_1263	Palearctic	Portugal	Azores	Terceira	Praia da Vitória	Paul do Belo Jardim	Paul do Belo Jardim - Margins; PBJ-T203	38°42’47.95’’N, 27°03’40.93’’W	38.7134	-27.0616	WGS84	5	10	2017-08-03	Day	Beating	sample 07	Arundo donax	Pimentel, C.				3	3	Animalia	Arthropoda	Arachnida	Araneae	Clubionidae	Clubiona	decora		Clubiona decora	Blackwall, 1859	Clubiona decora Blackwall, 1859	species	NAT	Borges, P. A.V.	2017
DTP Collection_1264	Palearctic	Portugal	Azores	Terceira	Praia da Vitória	Paul da Pedreira	Paul da Pedreira; PPCP-T202	38°42’13.09’’N; 27°02’46.37’’W	38.7043	-27.0465	WGS84	3	10	2017-06-28	Day	Beating	sample 07	Morella faya	Pimentel, C.				2	2	Animalia	Arthropoda	Arachnida	Araneae	Clubionidae	Clubiona	decora		Clubiona decora	Blackwall, 1859	Clubiona decora Blackwall, 1859	species	NAT	Borges, P. A.V.	2017
DTP Collection_1414	Palearctic	Portugal	Azores	Terceira	Praia da Vitória	Paul da Praia Vitória	Paul da Praia Vitória- Margins; PPV-T200	38°44’06.44’’N, 27°03’36.21’’W	38.735	-27.06	WGS84	6	10	2016-08-30	Day	Beating	sample 06	Morella faya	Pimentel, C.			1		1	Animalia	Arthropoda	Arachnida	Araneae	Clubionidae	Clubiona	decora		Clubiona decora	Blackwall, 1859	Clubiona decora Blackwall, 1859	species	NAT	Borges, P. A.V.	2016
DTP Collection_1415	Palearctic	Portugal	Azores	Terceira	Praia da Vitória	Paul da Praia Vitória	Paul da Praia Vitória- Margins; PPV-T200	38°44’06.44’’N, 27°03’36.21’’W	38.735	-27.06	WGS84	6	10	2016-08-30	Day	Beating	sample 06	Arundo donax	Pimentel, C.			1	1	2	Animalia	Arthropoda	Arachnida	Araneae	Clubionidae	Clubiona	decora		Clubiona decora	Blackwall, 1859	Clubiona decora Blackwall, 1859	species	NAT	Borges, P. A.V.	2016
DTP Collection_1416	Palearctic	Portugal	Azores	Terceira	Praia da Vitória	Paul do Belo Jardim	Paul do Belo Jardim - Margins; PBJ-T203	38°42’47.95’’N, 27°03’40.93’’W	38.7134	-27.0616	WGS84	5	10	2016-08-08	Day	Beating	sample 06	Arundo donax	Pimentel, C.			1	11	12	Animalia	Arthropoda	Arachnida	Araneae	Clubionidae	Clubiona	decora		Clubiona decora	Blackwall, 1859	Clubiona decora Blackwall, 1859	species	NAT	Borges, P. A.V.	2016
DTP Collection_1417	Palearctic	Portugal	Azores	Terceira	Praia da Vitória	Paul da Praia Vitória	Paul da Praia Vitória- Margins; PPV-T200	38°44’06.44’’N, 27°03’36.21’’W	38.735	-27.06	WGS84	6	10	2017-08-09	Day	Beating	sample 06	Arundo donax	Pimentel, C.			1	8	9	Animalia	Arthropoda	Arachnida	Araneae	Clubionidae	Clubiona	decora		Clubiona decora	Blackwall, 1859	Clubiona decora Blackwall, 1859	species	NAT	Borges, P. A.V.	2017
DTP Collection_1418	Palearctic	Portugal	Azores	Terceira	Praia da Vitória	Paul da Praia Vitória	Paul da Praia Vitória- Margins; PPV-T200	38°44’06.44’’N, 27°03’36.21’’W	38.735	-27.06	WGS84	6	10	2017-08-09	Day	Beating	sample 06	Morella faya	Pimentel, C.				3	3	Animalia	Arthropoda	Arachnida	Araneae	Clubionidae	Clubiona	decora		Clubiona decora	Blackwall, 1859	Clubiona decora Blackwall, 1859	species	NAT	Borges, P. A.V.	2017
DTP Collection_1419	Palearctic	Portugal	Azores	Terceira	Praia da Vitória	Paul do Belo Jardim	Paul do Belo Jardim - Margins; PBJ-T203	38°42’47.95’’N, 27°03’40.93’’W	38.7134	-27.0616	WGS84	5	10	2017-08-03	Day	Beating	sample 06	Arundo donax	Pimentel, C.		1	1	4	6	Animalia	Arthropoda	Arachnida	Araneae	Clubionidae	Clubiona	decora		Clubiona decora	Blackwall, 1859	Clubiona decora Blackwall, 1859	species	NAT	Borges, P. A.V.	2017
DTP Collection_1584	Palearctic	Portugal	Azores	Terceira	Praia da Vitória	Paul da Praia Vitória	Paul da Praia Vitória- Margins; PPV-T200	38°44’06.44’’N, 27°03’36.21’’W	38.735	-27.06	WGS84	6	10	2016-08-30	Day	Beating	sample 05	Arundo donax	Pimentel, C.				7	7	Animalia	Arthropoda	Arachnida	Araneae	Clubionidae	Clubiona	decora		Clubiona decora	Blackwall, 1859	Clubiona decora Blackwall, 1859	species	NAT	Borges, P. A.V.	2016
DTP Collection_1585	Palearctic	Portugal	Azores	Terceira	Praia da Vitória	Paul da Pedreira	Paul da Pedreira; PPCP-T202	38°42’13.09’’N; 27°02’46.37’’W	38.7043	-27.0465	WGS84	3	10	2016-08-30	Day	Beating	sample 05	Arundo donax	Pimentel, C.			3	2	5	Animalia	Arthropoda	Arachnida	Araneae	Clubionidae	Clubiona	decora		Clubiona decora	Blackwall, 1859	Clubiona decora Blackwall, 1859	species	NAT	Borges, P. A.V.	2016
DTP Collection_1586	Palearctic	Portugal	Azores	Terceira	Praia da Vitória	Paul da Praia Vitória	Paul da Praia Vitória- Margins; PPV-T200	38°44’06.44’’N, 27°03’36.21’’W	38.735	-27.06	WGS84	6	10	2017-08-09	Day	Beating	sample 05	Arundo donax	Pimentel, C.				14	14	Animalia	Arthropoda	Arachnida	Araneae	Clubionidae	Clubiona	decora		Clubiona decora	Blackwall, 1859	Clubiona decora Blackwall, 1859	species	NAT	Borges, P. A.V.	2017
DTP Collection_1587	Palearctic	Portugal	Azores	Terceira	Praia da Vitória	Paul do Belo Jardim	Paul do Belo Jardim - Margins; PBJ-T203	38°42’47.95’’N, 27°03’40.93’’W	38.7134	-27.0616	WGS84	5	10	2017-08-03	Day	Beating	sample 05	Arundo donax	Pimentel, C.				1	1	Animalia	Arthropoda	Arachnida	Araneae	Clubionidae	Clubiona	decora		Clubiona decora	Blackwall, 1859	Clubiona decora Blackwall, 1859	species	NAT	Borges, P. A.V.	2017
DTP Collection_1588	Palearctic	Portugal	Azores	Terceira	Praia da Vitória	Paul da Pedreira	Paul da Pedreira; PPCP-T202	38°42’13.09’’N; 27°02’46.37’’W	38.7043	-27.0465	WGS84	3	10	2017-06-28	Day	Beating	sample 05	Arundo donax	Pimentel, C.				1	1	Animalia	Arthropoda	Arachnida	Araneae	Clubionidae	Clubiona	decora		Clubiona decora	Blackwall, 1859	Clubiona decora Blackwall, 1859	species	NAT	Borges, P. A.V.	2017
DTP Collection_1589	Palearctic	Portugal	Azores	Terceira	Praia da Vitória	Paul da Pedreira	Paul da Pedreira; PPCP-T202	38°42’13.09’’N; 27°02’46.37’’W	38.7043	-27.0465	WGS84	3	10	2017-06-28	Day	Beating	sample 05	Morella faya	Pimentel, C.				2	2	Animalia	Arthropoda	Arachnida	Araneae	Clubionidae	Clubiona	decora		Clubiona decora	Blackwall, 1859	Clubiona decora Blackwall, 1859	species	NAT	Borges, P. A.V.	2017
DTP Collection_1779	Palearctic	Portugal	Azores	Terceira	Praia da Vitória	Paul da Praia Vitória	Paul da Praia Vitória- Margins; PPV-T200	38°44’06.44’’N, 27°03’36.21’’W	38.735	-27.06	WGS84	6	10	2016-08-30	Day	Beating	sample 04	Morella faya	Pimentel, C.		1			1	Animalia	Arthropoda	Arachnida	Araneae	Clubionidae	Clubiona	decora		Clubiona decora	Blackwall, 1859	Clubiona decora Blackwall, 1859	species	NAT	Borges, P. A.V.	2016
DTP Collection_1780	Palearctic	Portugal	Azores	Terceira	Praia da Vitória	Paul da Praia Vitória	Paul da Praia Vitória- Margins; PPV-T200	38°44’06.44’’N, 27°03’36.21’’W	38.735	-27.06	WGS84	6	10	2016-08-30	Day	Beating	sample 04	Arundo donax	Pimentel, C.				3	3	Animalia	Arthropoda	Arachnida	Araneae	Clubionidae	Clubiona	decora		Clubiona decora	Blackwall, 1859	Clubiona decora Blackwall, 1859	species	NAT	Borges, P. A.V.	2016
DTP Collection_1781	Palearctic	Portugal	Azores	Terceira	Praia da Vitória	Paul do Belo Jardim	Paul do Belo Jardim - Margins; PBJ-T203	38°42’47.95’’N, 27°03’40.93’’W	38.7134	-27.0616	WGS84	5	10	2016-08-08	Day	Beating	sample 04	Arundo donax	Pimentel, C.				1	1	Animalia	Arthropoda	Arachnida	Araneae	Clubionidae	Clubiona	decora		Clubiona decora	Blackwall, 1859	Clubiona decora Blackwall, 1859	species	NAT	Borges, P. A.V.	2016
DTP Collection_1782	Palearctic	Portugal	Azores	Terceira	Praia da Vitória	Paul da Pedreira	Paul da Pedreira; PPCP-T202	38°42’13.09’’N; 27°02’46.37’’W	38.7043	-27.0465	WGS84	3	10	2016-08-30	Day	Beating	sample 04	Arundo donax	Pimentel, C.				1	1	Animalia	Arthropoda	Arachnida	Araneae	Clubionidae	Clubiona	decora		Clubiona decora	Blackwall, 1859	Clubiona decora Blackwall, 1859	species	NAT	Borges, P. A.V.	2016
DTP Collection_1783	Palearctic	Portugal	Azores	Terceira	Praia da Vitória	Paul do Belo Jardim	Paul do Belo Jardim - Margins; PBJ-T203	38°42’47.95’’N, 27°03’40.93’’W	38.7134	-27.0616	WGS84	5	10	2016-08-31	Night	Active aerial searching	sample 04	na	Gabriel, R.				1	1	Animalia	Arthropoda	Arachnida	Araneae	Clubionidae	Clubiona	decora		Clubiona decora	Blackwall, 1859	Clubiona decora Blackwall, 1859	species	NAT	Borges, P. A.V.	2016
DTP Collection_1784	Palearctic	Portugal	Azores	Terceira	Praia da Vitória	Paul da Praia Vitória	Paul da Praia Vitória- Margins; PPV-T200	38°44’06.44’’N, 27°03’36.21’’W	38.735	-27.06	WGS84	6	10	2017-08-09	Day	Beating	sample 04	Arundo donax	Pimentel, C.			2	11	13	Animalia	Arthropoda	Arachnida	Araneae	Clubionidae	Clubiona	decora		Clubiona decora	Blackwall, 1859	Clubiona decora Blackwall, 1859	species	NAT	Borges, P. A.V.	2017
DTP Collection_1785	Palearctic	Portugal	Azores	Terceira	Praia da Vitória	Paul da Praia Vitória	Paul da Praia Vitória- Margins; PPV-T200	38°44’06.44’’N, 27°03’36.21’’W	38.735	-27.06	WGS84	6	10	2017-08-09	Day	Beating	sample 04	Morella faya	Pimentel, C.				6	6	Animalia	Arthropoda	Arachnida	Araneae	Clubionidae	Clubiona	decora		Clubiona decora	Blackwall, 1859	Clubiona decora Blackwall, 1859	species	NAT	Borges, P. A.V.	2017
DTP Collection_1786	Palearctic	Portugal	Azores	Terceira	Praia da Vitória	Paul da Praia Vitória	Paul da Praia Vitória- Margins; PPV-T200	38°44’06.44’’N, 27°03’36.21’’W	38.735	-27.06	WGS84	6	10	2017-08-31	Night	Active aerial searching	sample 04	na	Gabriel, R.				7	7	Animalia	Arthropoda	Arachnida	Araneae	Clubionidae	Clubiona	decora		Clubiona decora	Blackwall, 1859	Clubiona decora Blackwall, 1859	species	NAT	Borges, P. A.V.	2017
DTP Collection_1787	Palearctic	Portugal	Azores	Terceira	Praia da Vitória	Paul da Pedreira	Paul da Pedreira; PPCP-T202	38°42’13.09’’N; 27°02’46.37’’W	38.7043	-27.0465	WGS84	3	10	2017-06-21	Night	Active aerial searching	sample 04	na	Gabriel, R.				1	1	Animalia	Arthropoda	Arachnida	Araneae	Clubionidae	Clubiona	decora		Clubiona decora	Blackwall, 1859	Clubiona decora Blackwall, 1859	species	NAT	Borges, P. A.V.	2017
DTP Collection_1788	Palearctic	Portugal	Azores	Terceira	Praia da Vitória	Paul do Belo Jardim	Paul do Belo Jardim - Margins; PBJ-T203	38°42’47.95’’N, 27°03’40.93’’W	38.7134	-27.0616	WGS84	5	10	2017-08-30	Night	Sweeping	sample 04	na	Gabriel, R.			1	3	4	Animalia	Arthropoda	Arachnida	Araneae	Clubionidae	Clubiona	decora		Clubiona decora	Blackwall, 1859	Clubiona decora Blackwall, 1859	species	NAT	Borges, P. A.V.	2017
DTP Collection_1789	Palearctic	Portugal	Azores	Terceira	Praia da Vitória	Paul da Pedreira	Paul da Pedreira; PPCP-T202	38°42’13.09’’N; 27°02’46.37’’W	38.7043	-27.0465	WGS84	3	10	2016-06-21	Night	Sweeping	sample 04	na	Gabriel, R.		2	1	6	9	Animalia	Arthropoda	Arachnida	Araneae	Clubionidae	Clubiona	decora		Clubiona decora	Blackwall, 1859	Clubiona decora Blackwall, 1859	species	NAT	Borges, P. A.V.	2016
DTP Collection_1790	Palearctic	Portugal	Azores	Terceira	Praia da Vitória	Paul da Pedreira	Paul da Pedreira; PPCP-T202	38°42’13.09’’N; 27°02’46.37’’W	38.7043	-27.0465	WGS84	3	10	2017-06-28	Day	Beating	sample 04	Arundo donax	Pimentel, C.				2	2	Animalia	Arthropoda	Arachnida	Araneae	Clubionidae	Clubiona	decora		Clubiona decora	Blackwall, 1859	Clubiona decora Blackwall, 1859	species	NAT	Borges, P. A.V.	2017
DTP Collection_1791	Palearctic	Portugal	Azores	Terceira	Praia da Vitória	Paul da Pedreira	Paul da Pedreira; PPCP-T202	38°42’13.09’’N; 27°02’46.37’’W	38.7043	-27.0465	WGS84	3	10	2017-06-28	Day	Beating	sample 04	Morella faya	Pimentel, C.				2	2	Animalia	Arthropoda	Arachnida	Araneae	Clubionidae	Clubiona	decora		Clubiona decora	Blackwall, 1859	Clubiona decora Blackwall, 1859	species	NAT	Borges, P. A.V.	2017
DTP Collection_2111	Palearctic	Portugal	Azores	Terceira	Praia da Vitória	Paul da Praia Vitória	Paul da Praia Vitória- Margins; PPV-T200	38°44’06.44’’N, 27°03’36.21’’W	38.735	-27.06	WGS84	6	10	2016-08-30	Day	Beating	sample 03	Morella faya	Pimentel, C.			1		1	Animalia	Arthropoda	Arachnida	Araneae	Clubionidae	Clubiona	decora		Clubiona decora	Blackwall, 1859	Clubiona decora Blackwall, 1859	species	NAT	Borges, P. A.V.	2016
DTP Collection_2112	Palearctic	Portugal	Azores	Terceira	Praia da Vitória	Paul da Praia Vitória	Paul da Praia Vitória- Margins; PPV-T200	38°44’06.44’’N, 27°03’36.21’’W	38.735	-27.06	WGS84	6	10	2016-08-30	Day	Beating	sample 03	Arundo donax	Pimentel, C.		1			1	Animalia	Arthropoda	Arachnida	Araneae	Clubionidae	Clubiona	decora		Clubiona decora	Blackwall, 1859	Clubiona decora Blackwall, 1859	species	NAT	Borges, P. A.V.	2016
DTP Collection_2113	Palearctic	Portugal	Azores	Terceira	Praia da Vitória	Paul do Belo Jardim	Paul do Belo Jardim - Margins; PBJ-T203	38°42’47.95’’N, 27°03’40.93’’W	38.7134	-27.0616	WGS84	5	10	2016-08-08	Day	Beating	sample 03	Arundo donax	Pimentel, C.				1	1	Animalia	Arthropoda	Arachnida	Araneae	Clubionidae	Clubiona	decora		Clubiona decora	Blackwall, 1859	Clubiona decora Blackwall, 1859	species	NAT	Borges, P. A.V.	2016
DTP Collection_2114	Palearctic	Portugal	Azores	Terceira	Praia da Vitória	Paul do Belo Jardim	Paul do Belo Jardim - Margins; PBJ-T203	38°42’47.95’’N, 27°03’40.93’’W	38.7134	-27.0616	WGS84	5	10	2016-08-31	Night	Active aerial searching	sample 03	na	Borges, P.A.V.				1	1	Animalia	Arthropoda	Arachnida	Araneae	Clubionidae	Clubiona	decora		Clubiona decora	Blackwall, 1859	Clubiona decora Blackwall, 1859	species	NAT	Borges, P. A.V.	2016
DTP Collection_2115	Palearctic	Portugal	Azores	Terceira	Praia da Vitória	Paul da Pedreira	Paul da Pedreira; PPCP-T202	38°42’13.09’’N; 27°02’46.37’’W	38.7043	-27.0465	WGS84	3	10	2016-08-31	Night	Active aerial searching	sample 03	na	Gabriel, R.				2	2	Animalia	Arthropoda	Arachnida	Araneae	Clubionidae	Clubiona	decora		Clubiona decora	Blackwall, 1859	Clubiona decora Blackwall, 1859	species	NAT	Borges, P. A.V.	2016
DTP Collection_2116	Palearctic	Portugal	Azores	Terceira	Praia da Vitória	Paul da Praia Vitória	Paul da Praia Vitória- Margins; PPV-T200	38°44’06.44’’N, 27°03’36.21’’W	38.735	-27.06	WGS84	6	10	2016-09-01	Night	Active aerial searching	sample 03	na	Gabriel, R.		1	1	2	4	Animalia	Arthropoda	Arachnida	Araneae	Clubionidae	Clubiona	decora		Clubiona decora	Blackwall, 1859	Clubiona decora Blackwall, 1859	species	NAT	Borges, P. A.V.	2016
DTP Collection_2117	Palearctic	Portugal	Azores	Terceira	Praia da Vitória	Paul da Praia Vitória	Paul da Praia Vitória- Margins; PPV-T200	38°44’06.44’’N, 27°03’36.21’’W	38.735	-27.06	WGS84	6	10	2017-08-09	Day	Beating	sample 03	Arundo donax	Pimentel, C.				4	4	Animalia	Arthropoda	Arachnida	Araneae	Clubionidae	Clubiona	decora		Clubiona decora	Blackwall, 1859	Clubiona decora Blackwall, 1859	species	NAT	Borges, P. A.V.	2017
DTP Collection_2118	Palearctic	Portugal	Azores	Terceira	Praia da Vitória	Paul do Belo Jardim	Paul do Belo Jardim - Margins; PBJ-T203	38°42’47.95’’N, 27°03’40.93’’W	38.7134	-27.0616	WGS84	5	10	2017-08-03	Day	Beating	sample 03	Arundo donax	Pimentel, C.				1	1	Animalia	Arthropoda	Arachnida	Araneae	Clubionidae	Clubiona	decora		Clubiona decora	Blackwall, 1859	Clubiona decora Blackwall, 1859	species	NAT	Borges, P. A.V.	2017
DTP Collection_2119	Palearctic	Portugal	Azores	Terceira	Praia da Vitória	Paul da Pedreira	Paul da Pedreira; PPCP-T202	38°42’13.09’’N; 27°02’46.37’’W	38.7043	-27.0465	WGS84	3	10	2017-06-21	Night	Active aerial searching	sample 03	na	Borges, P.A.V.			1	5	6	Animalia	Arthropoda	Arachnida	Araneae	Clubionidae	Clubiona	decora		Clubiona decora	Blackwall, 1859	Clubiona decora Blackwall, 1859	species	NAT	Borges, P. A.V.	2017
DTP Collection_2120	Palearctic	Portugal	Azores	Terceira	Praia da Vitória	Paul da Pedreira	Paul da Pedreira; PPCP-T202	38°42’13.09’’N; 27°02’46.37’’W	38.7043	-27.0465	WGS84	3	10	2017-06-28	Day	Beating	sample 03	Morella faya	Pimentel, C.				6	6	Animalia	Arthropoda	Arachnida	Araneae	Clubionidae	Clubiona	decora		Clubiona decora	Blackwall, 1859	Clubiona decora Blackwall, 1859	species	NAT	Borges, P. A.V.	2017
DTP Collection_2447	Palearctic	Portugal	Azores	Terceira	Praia da Vitória	Paul da Praia Vitória	Paul da Praia Vitória- Margins; PPV-T200	38°44’06.44’’N, 27°03’36.21’’W	38.735	-27.06	WGS84	6	10	2016-08-30	Day	Beating	sample 02	Morella faya	Pimentel, C.			1	3	4	Animalia	Arthropoda	Arachnida	Araneae	Clubionidae	Clubiona	decora		Clubiona decora	Blackwall, 1859	Clubiona decora Blackwall, 1859	species	NAT	Borges, P. A.V.	2016
DTP Collection_2448	Palearctic	Portugal	Azores	Terceira	Praia da Vitória	Paul da Praia Vitória	Paul da Praia Vitória- Margins; PPV-T200	38°44’06.44’’N, 27°03’36.21’’W	38.735	-27.06	WGS84	6	10	2016-08-30	Day	Beating	sample 02	Arundo donax	Pimentel, C.				1	1	Animalia	Arthropoda	Arachnida	Araneae	Clubionidae	Clubiona	decora		Clubiona decora	Blackwall, 1859	Clubiona decora Blackwall, 1859	species	NAT	Borges, P. A.V.	2016
DTP Collection_2449	Palearctic	Portugal	Azores	Terceira	Praia da Vitória	Paul do Belo Jardim	Paul do Belo Jardim - Margins; PBJ-T203	38°42’47.95’’N, 27°03’40.93’’W	38.7134	-27.0616	WGS84	5	10	2016-08-08	Day	Beating	sample 02	Arundo donax	Pimentel, C.				5	5	Animalia	Arthropoda	Arachnida	Araneae	Clubionidae	Clubiona	decora		Clubiona decora	Blackwall, 1859	Clubiona decora Blackwall, 1859	species	NAT	Borges, P. A.V.	2016
DTP Collection_2450	Palearctic	Portugal	Azores	Terceira	Praia da Vitória	Paul da Pedreira	Paul da Pedreira; PPCP-T202	38°42’13.09’’N; 27°02’46.37’’W	38.7043	-27.0465	WGS84	3	10	2016-08-30	Day	Beating	sample 02	Arundo donax	Pimentel, C.		1		1	2	Animalia	Arthropoda	Arachnida	Araneae	Clubionidae	Clubiona	decora		Clubiona decora	Blackwall, 1859	Clubiona decora Blackwall, 1859	species	NAT	Borges, P. A.V.	2016
DTP Collection_2451	Palearctic	Portugal	Azores	Terceira	Praia da Vitória	Paul da Praia Vitória	Paul da Praia Vitória- Margins; PPV-T200	38°44’06.44’’N, 27°03’36.21’’W	38.735	-27.06	WGS84	6	10	2016-09-01	Night	Active aerial searching	sample 02	na	Borges, P.A.V.			1	1	2	Animalia	Arthropoda	Arachnida	Araneae	Clubionidae	Clubiona	decora		Clubiona decora	Blackwall, 1859	Clubiona decora Blackwall, 1859	species	NAT	Borges, P. A.V.	2016
DTP Collection_2452	Palearctic	Portugal	Azores	Terceira	Praia da Vitória	Paul da Praia Vitória	Paul da Praia Vitória- Margins; PPV-T200	38°44’06.44’’N, 27°03’36.21’’W	38.735	-27.06	WGS84	6	10	2017-08-09	Day	Beating	sample 02	Arundo donax	Pimentel, C.		2	1	5	8	Animalia	Arthropoda	Arachnida	Araneae	Clubionidae	Clubiona	decora		Clubiona decora	Blackwall, 1859	Clubiona decora Blackwall, 1859	species	NAT	Borges, P. A.V.	2017
DTP Collection_2453	Palearctic	Portugal	Azores	Terceira	Praia da Vitória	Paul da Praia Vitória	Paul da Praia Vitória- Margins; PPV-T200	38°44’06.44’’N, 27°03’36.21’’W	38.735	-27.06	WGS84	6	10	2017-08-09	Day	Beating	sample 02	Morella faya	Pimentel, C.			1	5	6	Animalia	Arthropoda	Arachnida	Araneae	Clubionidae	Clubiona	decora		Clubiona decora	Blackwall, 1859	Clubiona decora Blackwall, 1859	species	NAT	Borges, P. A.V.	2017
DTP Collection_2454	Palearctic	Portugal	Azores	Terceira	Praia da Vitória	Paul da Praia Vitória	Paul da Praia Vitória- Margins; PPV-T200	38°44’06.44’’N, 27°03’36.21’’W	38.735	-27.06	WGS84	6	10	2017-08-31	Night	Beating	sample 02	na	Borges, P.A.V.		1	12	38	51	Animalia	Arthropoda	Arachnida	Araneae	Clubionidae	Clubiona	decora		Clubiona decora	Blackwall, 1859	Clubiona decora Blackwall, 1859	species	NAT	Borges, P. A.V.	2017
DTP Collection_2455	Palearctic	Portugal	Azores	Terceira	Praia da Vitória	Paul da Pedreira	Paul da Pedreira; PPCP-T202	38°42’13.09’’N; 27°02’46.37’’W	38.7043	-27.0465	WGS84	3	10	2017-06-21	Night	Beating	sample 02	na	Borges, P.A.V.		1	3	18	22	Animalia	Arthropoda	Arachnida	Araneae	Clubionidae	Clubiona	decora		Clubiona decora	Blackwall, 1859	Clubiona decora Blackwall, 1859	species	NAT	Borges, P. A.V.	2017
DTP Collection_2456	Palearctic	Portugal	Azores	Terceira	Praia da Vitória	Paul da Pedreira	Paul da Pedreira; PPCP-T202	38°42’13.09’’N; 27°02’46.37’’W	38.7043	-27.0465	WGS84	3	10	2017-06-28	Day	Beating	sample 02	Arundo donax	Pimentel, C.				1	1	Animalia	Arthropoda	Arachnida	Araneae	Clubionidae	Clubiona	decora		Clubiona decora	Blackwall, 1859	Clubiona decora Blackwall, 1859	species	NAT	Borges, P. A.V.	2017
DTP Collection_2457	Palearctic	Portugal	Azores	Terceira	Praia da Vitória	Paul da Pedreira	Paul da Pedreira; PPCP-T202	38°42’13.09’’N; 27°02’46.37’’W	38.7043	-27.0465	WGS84	3	10	2017-06-28	Day	Beating	sample 02	Morella faya	Pimentel, C.				1	1	Animalia	Arthropoda	Arachnida	Araneae	Clubionidae	Clubiona	decora		Clubiona decora	Blackwall, 1859	Clubiona decora Blackwall, 1859	species	NAT	Borges, P. A.V.	2017
DTP Collection_2458	Palearctic	Portugal	Azores	Terceira	Praia da Vitória	Paul do Belo Jardim	Paul do Belo Jardim - Margins; PBJ-T203	38°42’47.95’’N, 27°03’40.93’’W	38.7134	-27.0616	WGS84	5	10	2017-08-30	Night	Beating	sample 02	na	Pimentel, C.			5	1	6	Animalia	Arthropoda	Arachnida	Araneae	Clubionidae	Clubiona	decora		Clubiona decora	Blackwall, 1859	Clubiona decora Blackwall, 1859	species	NAT	Borges, P. A.V.	2017
DTP Collection_2873	Palearctic	Portugal	Azores	Terceira	Praia da Vitória	Paul da Praia Vitória	Paul da Praia Vitória- Margins; PPV-T200	38°44’06.44’’N, 27°03’36.21’’W	38.735	-27.06	WGS84	6	10	2016-08-30	Day	Beating	sample 01	Arundo donax	Pimentel, C.			1	1	2	Animalia	Arthropoda	Arachnida	Araneae	Clubionidae	Clubiona	decora		Clubiona decora	Blackwall, 1859	Clubiona decora Blackwall, 1859	species	NAT	Borges, P. A.V.	2016
DTP Collection_2874	Palearctic	Portugal	Azores	Terceira	Praia da Vitória	Paul do Belo Jardim	Paul do Belo Jardim - Margins; PBJ-T203	38°42’47.95’’N, 27°03’40.93’’W	38.7134	-27.0616	WGS84	5	10	2016-08-08	Day	Beating	sample 01	Arundo donax	Pimentel, C.			1		1	Animalia	Arthropoda	Arachnida	Araneae	Clubionidae	Clubiona	decora		Clubiona decora	Blackwall, 1859	Clubiona decora Blackwall, 1859	species	NAT	Borges, P. A.V.	2016
DTP Collection_2875	Palearctic	Portugal	Azores	Terceira	Praia da Vitória	Paul da Pedreira	Paul da Pedreira; PPCP-T202	38°42’13.09’’N; 27°02’46.37’’W	38.7043	-27.0465	WGS84	3	10	2016-08-30	Day	Beating	sample 01	Arundo donax	Pimentel, C.				1	1	Animalia	Arthropoda	Arachnida	Araneae	Clubionidae	Clubiona	decora		Clubiona decora	Blackwall, 1859	Clubiona decora Blackwall, 1859	species	NAT	Borges, P. A.V.	2016
DTP Collection_2876	Palearctic	Portugal	Azores	Terceira	Praia da Vitória	Paul da Pedreira	Paul da Pedreira; PPCP-T202	38°42’13.09’’N; 27°02’46.37’’W	38.7043	-27.0465	WGS84	3	10	2016-08-31	Night	Active aerial searching	sample 01	na	Brito, M.			1		1	Animalia	Arthropoda	Arachnida	Araneae	Clubionidae	Clubiona	decora		Clubiona decora	Blackwall, 1859	Clubiona decora Blackwall, 1859	species	NAT	Borges, P. A.V.	2016
DTP Collection_2877	Palearctic	Portugal	Azores	Terceira	Praia da Vitória	Paul da Praia Vitória	Paul da Praia Vitória- Margins; PPV-T200	38°44’06.44’’N, 27°03’36.21’’W	38.735	-27.06	WGS84	6	10	2017-08-09	Day	Beating	sample 01	Arundo donax	Pimentel, C.				5	5	Animalia	Arthropoda	Arachnida	Araneae	Clubionidae	Clubiona	decora		Clubiona decora	Blackwall, 1859	Clubiona decora Blackwall, 1859	species	NAT	Borges, P. A.V.	2017
DTP Collection_2878	Palearctic	Portugal	Azores	Terceira	Praia da Vitória	Paul da Praia Vitória	Paul da Praia Vitória- Margins; PPV-T200	38°44’06.44’’N, 27°03’36.21’’W	38.735	-27.06	WGS84	6	10	2017-08-09	Day	Beating	sample 01	Morella faya	Pimentel, C.				4	4	Animalia	Arthropoda	Arachnida	Araneae	Clubionidae	Clubiona	decora		Clubiona decora	Blackwall, 1859	Clubiona decora Blackwall, 1859	species	NAT	Borges, P. A.V.	2017
DTP Collection_2879	Palearctic	Portugal	Azores	Terceira	Praia da Vitória	Paul do Belo Jardim	Paul do Belo Jardim - Margins; PBJ-T203	38°42’47.95’’N, 27°03’40.93’’W	38.7134	-27.0616	WGS84	5	10	2017-08-03	Day	Beating	sample 01	Arundo donax	Pimentel, C.			1		1	Animalia	Arthropoda	Arachnida	Araneae	Clubionidae	Clubiona	decora		Clubiona decora	Blackwall, 1859	Clubiona decora Blackwall, 1859	species	NAT	Borges, P. A.V.	2017
DTP Collection_2880	Palearctic	Portugal	Azores	Terceira	Praia da Vitória	Paul da Praia Vitória	Paul da Praia Vitória- Margins; PPV-T200	38°44’06.44’’N, 27°03’36.21’’W	38.735	-27.06	WGS84	6	10	2017-08-31	Night	Beating	sample 01	na	Pimentel, C.				4	4	Animalia	Arthropoda	Arachnida	Araneae	Clubionidae	Clubiona	decora		Clubiona decora	Blackwall, 1859	Clubiona decora Blackwall, 1859	species	NAT	Borges, P. A.V.	2017
DTP Collection_2881	Palearctic	Portugal	Azores	Terceira	Praia da Vitória	Paul da Pedreira	Paul da Pedreira; PPCP-T202	38°42’13.09’’N; 27°02’46.37’’W	38.7043	-27.0465	WGS84	3	10	2017-06-21	Night	Active aerial searching	sample 01	na	Pimentel, C.			1	4	5	Animalia	Arthropoda	Arachnida	Araneae	Clubionidae	Clubiona	decora		Clubiona decora	Blackwall, 1859	Clubiona decora Blackwall, 1859	species	NAT	Borges, P. A.V.	2017
DTP Collection_2882	Palearctic	Portugal	Azores	Terceira	Praia da Vitória	Paul da Pedreira	Paul da Pedreira; PPCP-T202	38°42’13.09’’N; 27°02’46.37’’W	38.7043	-27.0465	WGS84	3	10	2017-06-21	Night	Beating	sample 01	na	Pimentel, C.		1		8	9	Animalia	Arthropoda	Arachnida	Araneae	Clubionidae	Clubiona	decora		Clubiona decora	Blackwall, 1859	Clubiona decora Blackwall, 1859	species	NAT	Borges, P. A.V.	2017
DTP Collection_2883	Palearctic	Portugal	Azores	Terceira	Praia da Vitória	Paul do Belo Jardim	Paul do Belo Jardim - Margins; PBJ-T203	38°42’47.95’’N, 27°03’40.93’’W	38.7134	-27.0616	WGS84	5	10	2017-08-30	Night	Beating	sample 01	na	Borges, P.A.V.				4	4	Animalia	Arthropoda	Arachnida	Araneae	Clubionidae	Clubiona	decora		Clubiona decora	Blackwall, 1859	Clubiona decora Blackwall, 1859	species	NAT	Borges, P. A.V.	2017
DTP Collection_1792	Palearctic	Portugal	Azores	Terceira	Praia da Vitória	Paul da Praia Vitória	Paul da Praia Vitória- Margins; PPV-T200	38°44’06.44’’N, 27°03’36.21’’W	38.735	-27.06	WGS84	6	10	2017-08-31	Night	Sweeping	sample 04	na	Brito, M.			1		1	Animalia	Arthropoda	Arachnida	Araneae	Clubionidae	Clubiona	terrestris		Clubiona terrestris	Westring, 1851	Clubiona terrestris Westring, 1851	species	INTR	Crespo, L.	2017
DTP Collection_2121	Palearctic	Portugal	Azores	Terceira	Praia da Vitória	Paul da Praia Vitória	Paul da Praia Vitória- Margins; PPV-T200	38°44’06.44’’N, 27°03’36.21’’W	38.735	-27.06	WGS84	6	10	2016-09-01	Night	Active aerial searching	sample 03	na	Gabriel, R.				1	1	Animalia	Arthropoda	Arachnida	Araneae	Clubionidae	Clubiona	terrestris		Clubiona terrestris	Westring, 1851	Clubiona terrestris Westring, 1851	species	INTR	Crespo, L.	2016
DTP Collection_2122	Palearctic	Portugal	Azores	Terceira	Praia da Vitória	Paul da Praia Vitória	Paul da Praia Vitória- Margins; PPV-T200	38°44’06.44’’N, 27°03’36.21’’W	38.735	-27.06	WGS84	6	10	2017-08-31	Night	Active aerial searching	sample 03	na	Borges, P.A.V.		1		11	12	Animalia	Arthropoda	Arachnida	Araneae	Clubionidae	Clubiona	terrestris		Clubiona terrestris	Westring, 1851	Clubiona terrestris Westring, 1851	species	INTR	Crespo, L.	2017
DTP Collection_2123	Palearctic	Portugal	Azores	Terceira	Praia da Vitória	Paul da Praia Vitória	Paul da Praia Vitória- Margins; PPV-T200	38°44’06.44’’N, 27°03’36.21’’W	38.735	-27.06	WGS84	6	10	2017-08-31	Night	Sweeping	sample 03	na	Gabriel, R.			1	1	2	Animalia	Arthropoda	Arachnida	Araneae	Clubionidae	Clubiona	terrestris		Clubiona terrestris	Westring, 1851	Clubiona terrestris Westring, 1851	species	INTR	Crespo, L.	2017
DTP Collection_2459	Palearctic	Portugal	Azores	Terceira	Praia da Vitória	Paul da Praia Vitória	Paul da Praia Vitória- Margins; PPV-T200	38°44’06.44’’N, 27°03’36.21’’W	38.735	-27.06	WGS84	6	10	2017-08-31	Night	Beating	sample 02	na	Borges, P.A.V.		1	2	10	13	Animalia	Arthropoda	Arachnida	Araneae	Clubionidae	Clubiona	terrestris		Clubiona terrestris	Westring, 1851	Clubiona terrestris Westring, 1851	species	INTR	Crespo, L.	2017
DTP Collection_2460	Palearctic	Portugal	Azores	Terceira	Praia da Vitória	Paul da Praia Vitória	Paul da Praia Vitória- Margins; PPV-T200	38°44’06.44’’N, 27°03’36.21’’W	38.735	-27.06	WGS84	6	10	2017-08-31	Night	Active aerial searching	sample 02	na	Brito, M.			1		1	Animalia	Arthropoda	Arachnida	Araneae	Clubionidae	Clubiona	terrestris		Clubiona terrestris	Westring, 1851	Clubiona terrestris Westring, 1851	species	INTR	Crespo, L.	2017
DTP Collection_1514	Palearctic	Portugal	Azores	Terceira	Praia da Vitória	Paul do Belo Jardim	Paul do Belo Jardim - Margins; PBJ-T203	38°42’47.95’’N, 27°03’40.93’’W	38.7134	-27.0616	WGS84	5	10	2017-08-03	Day	Beating	sample 06	Arundo donax	Pimentel, C.	1				1	Animalia	Arthropoda	Insecta	Coleoptera	Coccinellidae	Coccinella	undecimpunctata	undecimpunctata	Coccinella undecimpunctata undecimpunctata	Linnaeus, 1758	Coccinella undecimpunctata undecimpunctata Linnaeus, 1758	subspecies	INTR	Borges, P. A.V.	2017
DTP Collection_1687	Palearctic	Portugal	Azores	Terceira	Praia da Vitória	Paul do Belo Jardim	Paul do Belo Jardim - Margins; PBJ-T203	38°42’47.95’’N, 27°03’40.93’’W	38.7134	-27.0616	WGS84	5	10	2017-08-03	Day	Beating	sample 05	Arundo donax	Pimentel, C.	1				1	Animalia	Arthropoda	Insecta	Coleoptera	Coccinellidae	Coccinella	undecimpunctata	undecimpunctata	Coccinella undecimpunctata undecimpunctata	Linnaeus, 1758	Coccinella undecimpunctata undecimpunctata Linnaeus, 1758	subspecies	INTR	Borges, P. A.V.	2017
DTP Collection_2706	Palearctic	Portugal	Azores	Terceira	Praia da Vitória	Paul do Belo Jardim	Paul do Belo Jardim - Margins; PBJ-T203	38°42’47.95’’N, 27°03’40.93’’W	38.7134	-27.0616	WGS84	5	10	2017-08-30	Night	Beating	sample 02	na	Pimentel, C.	9				9	Animalia	Arthropoda	Insecta	Coleoptera	Coccinellidae	Coccinella	undecimpunctata	undecimpunctata	Coccinella undecimpunctata undecimpunctata	Linnaeus, 1758	Coccinella undecimpunctata undecimpunctata Linnaeus, 1758	subspecies	INTR	Borges, P. A.V.	2017
DTP Collection_1039	Palearctic	Portugal	Azores	Terceira	Praia da Vitória	Paul da Praia Vitória	Paul da Praia Vitória- Margins; PPV-T200	38°44’06.44’’N, 27°03’36.21’’W	38.735	-27.06	WGS84	6	10	2017-08-23	Day/Night	Pitfall	sample 09	na	Pimentel, C.	1				1	Animalia	Arthropoda	Insecta	Coleoptera	Curculionidae	Coccotrypes	carpophagus		Coccotrypes carpophagus	(Hornung, 1842)	Coccotrypes carpophagus (Hornung, 1842)	species	INTR	Borges, P. A.V.	2017
DTP Collection_1971	Palearctic	Portugal	Azores	Terceira	Praia da Vitória	Paul da Pedreira	Paul da Pedreira; PPCP-T202	38°42’13.09’’N; 27°02’46.37’’W	38.7043	-27.0465	WGS84	3	10	2017-06-28	Day	Beating	sample 04	Arundo donax	Pimentel, C.	1				1	Animalia	Arthropoda	Insecta	Coleoptera	Curculionidae	Coelositona	puberulus		Coelositona puberulus	(Reitter, 1903)	Coelositona puberulus (Reitter, 1903)	species	INTR	Stüben, P.E.	2017
DTP Collection_2721	Palearctic	Portugal	Azores	Terceira	Praia da Vitória	Paul da Pedreira	Paul da Pedreira; PPCP-T202	38°42’13.09’’N; 27°02’46.37’’W	38.7043	-27.0465	WGS84	3	10	2017-06-21	Night	Active aerial searching	sample 02	na	Brito, M.	2				2	Animalia	Arthropoda	Insecta	Coleoptera	Curculionidae	Coelositona	puberulus		Coelositona puberulus	(Reitter, 1903)	Coelositona puberulus (Reitter, 1903)	species	INTR	Stüben, P.E.	2017
DTP Collection_2032	Palearctic	Portugal	Azores	Terceira	Praia da Vitória	Paul da Praia Vitória	Paul da Praia Vitória- Margins; PPV-T200	38°44’06.44’’N, 27°03’36.21’’W	38.735	-27.06	WGS84	6	10	2016-09-01	Night	Active aerial searching	sample 04	na	Pimentel, C.	2				2	Animalia	Arthropoda	Insecta	Lepidoptera	Pieridae	Colias	croceus		Colias croceus	(Fourcroy, 1785)	Colias croceus (Fourcroy, 1785)	species	NAT	Borges, P. A.V.	2016
DTP Collection_2033	Palearctic	Portugal	Azores	Terceira	Praia da Vitória	Paul da Praia Vitória	Paul da Praia Vitória- Margins; PPV-T200	38°44’06.44’’N, 27°03’36.21’’W	38.735	-27.06	WGS84	6	10	2017-08-31	Night	Sweeping	sample 04	na	Brito, M.	1				1	Animalia	Arthropoda	Insecta	Lepidoptera	Pieridae	Colias	croceus		Colias croceus	(Fourcroy, 1785)	Colias croceus (Fourcroy, 1785)	species	NAT	Borges, P. A.V.	2017
DTP Collection_2034	Palearctic	Portugal	Azores	Terceira	Praia da Vitória	Paul do Belo Jardim	Paul do Belo Jardim - Margins; PBJ-T203	38°42’47.95’’N, 27°03’40.93’’W	38.7134	-27.0616	WGS84	5	10	2017-08-30	Night	Sweeping	sample 04	na	Gabriel, R.	1				1	Animalia	Arthropoda	Insecta	Lepidoptera	Pieridae	Colias	croceus		Colias croceus	(Fourcroy, 1785)	Colias croceus (Fourcroy, 1785)	species	NAT	Borges, P. A.V.	2017
DTP Collection_2375	Palearctic	Portugal	Azores	Terceira	Praia da Vitória	Paul da Praia Vitória	Paul da Praia Vitória- Margins; PPV-T200	38°44’06.44’’N, 27°03’36.21’’W	38.735	-27.06	WGS84	6	10	2016-09-01	Night	Active aerial searching	sample 03	na	Gabriel, R.	1				1	Animalia	Arthropoda	Insecta	Lepidoptera	Pieridae	Colias	croceus		Colias croceus	(Fourcroy, 1785)	Colias croceus (Fourcroy, 1785)	species	NAT	Borges, P. A.V.	2016
DTP Collection_2376	Palearctic	Portugal	Azores	Terceira	Praia da Vitória	Paul do Belo Jardim	Paul do Belo Jardim - Margins; PBJ-T203	38°42’47.95’’N, 27°03’40.93’’W	38.7134	-27.0616	WGS84	5	10	2017-08-30	Night	Active aerial searching	sample 03	na	Borges, P.A.V.	4				4	Animalia	Arthropoda	Insecta	Lepidoptera	Pieridae	Colias	croceus		Colias croceus	(Fourcroy, 1785)	Colias croceus (Fourcroy, 1785)	species	NAT	Borges, P. A.V.	2017
DTP Collection_2377	Palearctic	Portugal	Azores	Terceira	Praia da Vitória	Paul do Belo Jardim	Paul do Belo Jardim - Margins; PBJ-T203	38°42’47.95’’N, 27°03’40.93’’W	38.7134	-27.0616	WGS84	5	10	2017-08-30	Night	Sweeping	sample 03	na	Brito, M.	1				1	Animalia	Arthropoda	Insecta	Lepidoptera	Pieridae	Colias	croceus		Colias croceus	(Fourcroy, 1785)	Colias croceus (Fourcroy, 1785)	species	NAT	Borges, P. A.V.	2017
DTP Collection_2791	Palearctic	Portugal	Azores	Terceira	Praia da Vitória	Paul do Belo Jardim	Paul do Belo Jardim - Margins; PBJ-T203	38°42’47.95’’N, 27°03’40.93’’W	38.7134	-27.0616	WGS84	5	10	2016-09-15	Day	Sweeping	sample 02	na	Goulart, S. & Pimentel, C.	1			1	2	Animalia	Arthropoda	Insecta	Lepidoptera	Pieridae	Colias	croceus		Colias croceus	(Fourcroy, 1785)	Colias croceus (Fourcroy, 1785)	species	NAT	Borges, P. A.V.	2016
DTP Collection_2792	Palearctic	Portugal	Azores	Terceira	Praia da Vitória	Paul do Belo Jardim	Paul do Belo Jardim - Margins; PBJ-T203	38°42’47.95’’N, 27°03’40.93’’W	38.7134	-27.0616	WGS84	5	10	2016-08-31	Night	Active aerial searching	sample 02	na	Pimentel, C.	1				1	Animalia	Arthropoda	Insecta	Lepidoptera	Pieridae	Colias	croceus		Colias croceus	(Fourcroy, 1785)	Colias croceus (Fourcroy, 1785)	species	NAT	Borges, P. A.V.	2016
DTP Collection_2793	Palearctic	Portugal	Azores	Terceira	Praia da Vitória	Paul da Praia Vitória	Paul da Praia Vitória- Margins; PPV-T200	38°44’06.44’’N, 27°03’36.21’’W	38.735	-27.06	WGS84	6	10	2016-09-01	Night	Active aerial searching	sample 02	na	Borges, P.A.V.	1				1	Animalia	Arthropoda	Insecta	Lepidoptera	Pieridae	Colias	croceus		Colias croceus	(Fourcroy, 1785)	Colias croceus (Fourcroy, 1785)	species	NAT	Borges, P. A.V.	2016
DTP Collection_2794	Palearctic	Portugal	Azores	Terceira	Praia da Vitória	Paul da Praia Vitória	Paul da Praia Vitória- Margins; PPV-T200	38°44’06.44’’N, 27°03’36.21’’W	38.735	-27.06	WGS84	6	10	2017-08-31	Night	Active aerial searching	sample 02	na	Brito, M.	1				1	Animalia	Arthropoda	Insecta	Lepidoptera	Pieridae	Colias	croceus		Colias croceus	(Fourcroy, 1785)	Colias croceus (Fourcroy, 1785)	species	NAT	Borges, P. A.V.	2017
DTP Collection_2795	Palearctic	Portugal	Azores	Terceira	Praia da Vitória	Paul do Belo Jardim	Paul do Belo Jardim - Margins; PBJ-T203	38°42’47.95’’N, 27°03’40.93’’W	38.7134	-27.0616	WGS84	5	10	2017-08-30	Night	Active aerial searching	sample 02	na	Brito, M.	1				1	Animalia	Arthropoda	Insecta	Lepidoptera	Pieridae	Colias	croceus		Colias croceus	(Fourcroy, 1785)	Colias croceus (Fourcroy, 1785)	species	NAT	Borges, P. A.V.	2017
DTP Collection_3194	Palearctic	Portugal	Azores	Terceira	Praia da Vitória	Paul do Belo Jardim	Paul do Belo Jardim - Margins; PBJ-T203	38°42’47.95’’N, 27°03’40.93’’W	38.7134	-27.0616	WGS84	5	10	2016-08-31	Night	Active aerial searching	sample 01	na	Brito, M.	1				1	Animalia	Arthropoda	Insecta	Lepidoptera	Pieridae	Colias	croceus		Colias croceus	(Fourcroy, 1785)	Colias croceus (Fourcroy, 1785)	species	NAT	Borges, P. A.V.	2016
DTP Collection_3195	Palearctic	Portugal	Azores	Terceira	Praia da Vitória	Paul da Pedreira	Paul da Pedreira; PPCP-T202	38°42’13.09’’N; 27°02’46.37’’W	38.7043	-27.0465	WGS84	3	10	2016-08-31	Night	Active aerial searching	sample 01	na	Brito, M.	2				2	Animalia	Arthropoda	Insecta	Lepidoptera	Pieridae	Colias	croceus		Colias croceus	(Fourcroy, 1785)	Colias croceus (Fourcroy, 1785)	species	NAT	Borges, P. A.V.	2016
DTP Collection_3196	Palearctic	Portugal	Azores	Terceira	Praia da Vitória	Paul da Praia Vitória	Paul da Praia Vitória- Margins; PPV-T200	38°44’06.44’’N, 27°03’36.21’’W	38.735	-27.06	WGS84	6	10	2016-09-01	Night	Active aerial searching	sample 01	na	Brito, M.	2				2	Animalia	Arthropoda	Insecta	Lepidoptera	Pieridae	Colias	croceus		Colias croceus	(Fourcroy, 1785)	Colias croceus (Fourcroy, 1785)	species	NAT	Borges, P. A.V.	2016
DTP Collection_3197	Palearctic	Portugal	Azores	Terceira	Praia da Vitória	Paul do Belo Jardim	Paul do Belo Jardim - Margins; PBJ-T203	38°42’47.95’’N, 27°03’40.93’’W	38.7134	-27.0616	WGS84	5	10	2017-08-30	Night	Beating	sample 01	na	Borges, P.A.V.	1			1	2	Animalia	Arthropoda	Insecta	Lepidoptera	Pieridae	Colias	croceus		Colias croceus	(Fourcroy, 1785)	Colias croceus (Fourcroy, 1785)	species	NAT	Borges, P. A.V.	2017
DTP Collection_3198	Palearctic	Portugal	Azores	Terceira	Praia da Vitória	Paul da Praia Vitória	Paul da Praia Vitória- Margins; PPV-T200	38°44’06.44’’N, 27°03’36.21’’W	38.735	-27.06	WGS84	6	10	2017-09-06	Day	Sweeping	sample 01	na	Pimentel, C.	2				2	Animalia	Arthropoda	Insecta	Lepidoptera	Pieridae	Colias	croceus		Colias croceus	(Fourcroy, 1785)	Colias croceus (Fourcroy, 1785)	species	NAT	Borges, P. A.V.	2017
DTP Collection_816	Palearctic	Portugal	Azores	Terceira	Praia da Vitória	Paul do Belo Jardim	Paul do Belo Jardim - Margins; PBJ-T203	38°42’47.95’’N, 27°03’40.93’’W	38.7134	-27.0616	WGS84	5	10	2016-08-08	Day	Beating	sample 10	Juncus acutus	Pimentel, C.	1				1	Animalia	Arthropoda	Insecta	Orthoptera	Conocephalidae	Conocephalus	chavesi		Conocephalus chavesi	(Bolivar, 1905)	Conocephalus chavesi (Bolivar, 1905)	species	END	Borges, P. A.V.	2016
DTP Collection_1000	Palearctic	Portugal	Azores	Terceira	Praia da Vitória	Paul do Belo Jardim	Paul do Belo Jardim - Margins; PBJ-T203	38°42’47.95’’N, 27°03’40.93’’W	38.7134	-27.0616	WGS84	5	10	2017-08-03	Day	Beating	sample 09	Juncus acutus	Pimentel, C.				4	4	Animalia	Arthropoda	Insecta	Orthoptera	Conocephalidae	Conocephalus	chavesi		Conocephalus chavesi	(Bolivar, 1905)	Conocephalus chavesi (Bolivar, 1905)	species	END	Borges, P. A.V.	2017
DTP Collection_1475	Palearctic	Portugal	Azores	Terceira	Praia da Vitória	Paul do Belo Jardim	Paul do Belo Jardim - Margins; PBJ-T203	38°42’47.95’’N, 27°03’40.93’’W	38.7134	-27.0616	WGS84	5	10	2017-08-03	Day	Beating	sample 06	Juncus acutus	Pimentel, C.				4	4	Animalia	Arthropoda	Insecta	Orthoptera	Conocephalidae	Conocephalus	chavesi		Conocephalus chavesi	(Bolivar, 1905)	Conocephalus chavesi (Bolivar, 1905)	species	END	Borges, P. A.V.	2017
DTP Collection_1895	Palearctic	Portugal	Azores	Terceira	Praia da Vitória	Paul do Belo Jardim	Paul do Belo Jardim - Margins; PBJ-T203	38°42’47.95’’N, 27°03’40.93’’W	38.7134	-27.0616	WGS84	5	10	2016-08-31	Night	Active aerial searching	sample 04	na	Gabriel, R.	3				3	Animalia	Arthropoda	Insecta	Orthoptera	Conocephalidae	Conocephalus	chavesi		Conocephalus chavesi	(Bolivar, 1905)	Conocephalus chavesi (Bolivar, 1905)	species	END	Borges, P. A.V.	2016
DTP Collection_1896	Palearctic	Portugal	Azores	Terceira	Praia da Vitória	Paul da Praia Vitória	Paul da Praia Vitória- Margins; PPV-T200	38°44’06.44’’N, 27°03’36.21’’W	38.735	-27.06	WGS84	6	10	2017-08-31	Night	Active aerial searching	sample 04	na	Gabriel, R.	3			1	4	Animalia	Arthropoda	Insecta	Orthoptera	Conocephalidae	Conocephalus	chavesi		Conocephalus chavesi	(Bolivar, 1905)	Conocephalus chavesi (Bolivar, 1905)	species	END	Borges, P. A.V.	2017
DTP Collection_1897	Palearctic	Portugal	Azores	Terceira	Praia da Vitória	Paul da Praia Vitória	Paul da Praia Vitória- Margins; PPV-T200	38°44’06.44’’N, 27°03’36.21’’W	38.735	-27.06	WGS84	6	10	2017-08-31	Night	Sweeping	sample 04	na	Brito, M.				4	4	Animalia	Arthropoda	Insecta	Orthoptera	Conocephalidae	Conocephalus	chavesi		Conocephalus chavesi	(Bolivar, 1905)	Conocephalus chavesi (Bolivar, 1905)	species	END	Borges, P. A.V.	2017
DTP Collection_1898	Palearctic	Portugal	Azores	Terceira	Praia da Vitória	Paul da Pedreira	Paul da Pedreira; PPCP-T202	38°42’13.09’’N; 27°02’46.37’’W	38.7043	-27.0465	WGS84	3	10	2017-06-21	Night	Active aerial searching	sample 04	na	Gabriel, R.				1	1	Animalia	Arthropoda	Insecta	Orthoptera	Conocephalidae	Conocephalus	chavesi		Conocephalus chavesi	(Bolivar, 1905)	Conocephalus chavesi (Bolivar, 1905)	species	END	Borges, P. A.V.	2017
DTP Collection_1899	Palearctic	Portugal	Azores	Terceira	Praia da Vitória	Paul do Belo Jardim	Paul do Belo Jardim - Margins; PBJ-T203	38°42’47.95’’N, 27°03’40.93’’W	38.7134	-27.0616	WGS84	5	10	2017-08-30	Night	Active aerial searching	sample 04	na	Gabriel, R.	2			27	29	Animalia	Arthropoda	Insecta	Orthoptera	Conocephalidae	Conocephalus	chavesi		Conocephalus chavesi	(Bolivar, 1905)	Conocephalus chavesi (Bolivar, 1905)	species	END	Borges, P. A.V.	2017
DTP Collection_1900	Palearctic	Portugal	Azores	Terceira	Praia da Vitória	Paul do Belo Jardim	Paul do Belo Jardim - Margins; PBJ-T203	38°42’47.95’’N, 27°03’40.93’’W	38.7134	-27.0616	WGS84	5	10	2017-08-30	Night	Sweeping	sample 04	na	Gabriel, R.	1			82	83	Animalia	Arthropoda	Insecta	Orthoptera	Conocephalidae	Conocephalus	chavesi		Conocephalus chavesi	(Bolivar, 1905)	Conocephalus chavesi (Bolivar, 1905)	species	END	Borges, P. A.V.	2017
DTP Collection_1901	Palearctic	Portugal	Azores	Terceira	Praia da Vitória	Paul da Pedreira	Paul da Pedreira; PPCP-T202	38°42’13.09’’N; 27°02’46.37’’W	38.7043	-27.0465	WGS84	3	10	2016-06-21	Night	Sweeping	sample 04	na	Gabriel, R.				13	13	Animalia	Arthropoda	Insecta	Orthoptera	Conocephalidae	Conocephalus	chavesi		Conocephalus chavesi	(Bolivar, 1905)	Conocephalus chavesi (Bolivar, 1905)	species	END	Borges, P. A.V.	2016
DTP Collection_2229	Palearctic	Portugal	Azores	Terceira	Praia da Vitória	Paul do Belo Jardim	Paul do Belo Jardim - Margins; PBJ-T203	38°42’47.95’’N, 27°03’40.93’’W	38.7134	-27.0616	WGS84	5	10	2016-08-31	Night	Active aerial searching	sample 03	na	Borges, P.A.V.	5				5	Animalia	Arthropoda	Insecta	Orthoptera	Conocephalidae	Conocephalus	chavesi		Conocephalus chavesi	(Bolivar, 1905)	Conocephalus chavesi (Bolivar, 1905)	species	END	Borges, P. A.V.	2016
DTP Collection_2230	Palearctic	Portugal	Azores	Terceira	Praia da Vitória	Paul da Praia Vitória	Paul da Praia Vitória- Margins; PPV-T200	38°44’06.44’’N, 27°03’36.21’’W	38.735	-27.06	WGS84	6	10	2017-08-31	Night	Active aerial searching	sample 03	na	Borges, P.A.V.	1				1	Animalia	Arthropoda	Insecta	Orthoptera	Conocephalidae	Conocephalus	chavesi		Conocephalus chavesi	(Bolivar, 1905)	Conocephalus chavesi (Bolivar, 1905)	species	END	Borges, P. A.V.	2017
DTP Collection_2231	Palearctic	Portugal	Azores	Terceira	Praia da Vitória	Paul da Praia Vitória	Paul da Praia Vitória- Margins; PPV-T200	38°44’06.44’’N, 27°03’36.21’’W	38.735	-27.06	WGS84	6	10	2017-08-31	Night	Sweeping	sample 03	na	Gabriel, R.	1			9	10	Animalia	Arthropoda	Insecta	Orthoptera	Conocephalidae	Conocephalus	chavesi		Conocephalus chavesi	(Bolivar, 1905)	Conocephalus chavesi (Bolivar, 1905)	species	END	Borges, P. A.V.	2017
DTP Collection_2232	Palearctic	Portugal	Azores	Terceira	Praia da Vitória	Paul do Belo Jardim	Paul do Belo Jardim - Margins; PBJ-T203	38°42’47.95’’N, 27°03’40.93’’W	38.7134	-27.0616	WGS84	5	10	2017-08-30	Night	Active aerial searching	sample 03	na	Borges, P.A.V.				11	11	Animalia	Arthropoda	Insecta	Orthoptera	Conocephalidae	Conocephalus	chavesi		Conocephalus chavesi	(Bolivar, 1905)	Conocephalus chavesi (Bolivar, 1905)	species	END	Borges, P. A.V.	2017
DTP Collection_2233	Palearctic	Portugal	Azores	Terceira	Praia da Vitória	Paul do Belo Jardim	Paul do Belo Jardim - Margins; PBJ-T203	38°42’47.95’’N, 27°03’40.93’’W	38.7134	-27.0616	WGS84	5	10	2017-08-30	Night	Sweeping	sample 03	na	Brito, M.				10	10	Animalia	Arthropoda	Insecta	Orthoptera	Conocephalidae	Conocephalus	chavesi		Conocephalus chavesi	(Bolivar, 1905)	Conocephalus chavesi (Bolivar, 1905)	species	END	Borges, P. A.V.	2017
DTP Collection_2234	Palearctic	Portugal	Azores	Terceira	Praia da Vitória	Paul da Pedreira	Paul da Pedreira; PPCP-T202	38°42’13.09’’N; 27°02’46.37’’W	38.7043	-27.0465	WGS84	3	10	2016-06-21	Night	Sweeping	sample 03	na	Brito, M.				4	4	Animalia	Arthropoda	Insecta	Orthoptera	Conocephalidae	Conocephalus	chavesi		Conocephalus chavesi	(Bolivar, 1905)	Conocephalus chavesi (Bolivar, 1905)	species	END	Borges, P. A.V.	2016
DTP Collection_2600	Palearctic	Portugal	Azores	Terceira	Praia da Vitória	Paul do Belo Jardim	Paul do Belo Jardim - Margins; PBJ-T203	38°42’47.95’’N, 27°03’40.93’’W	38.7134	-27.0616	WGS84	5	10	2016-08-31	Night	Active aerial searching	sample 02	na	Pimentel, C.	16				16	Animalia	Arthropoda	Insecta	Orthoptera	Conocephalidae	Conocephalus	chavesi		Conocephalus chavesi	(Bolivar, 1905)	Conocephalus chavesi (Bolivar, 1905)	species	END	Borges, P. A.V.	2016
DTP Collection_2601	Palearctic	Portugal	Azores	Terceira	Praia da Vitória	Paul da Praia Vitória	Paul da Praia Vitória- Margins; PPV-T200	38°44’06.44’’N, 27°03’36.21’’W	38.735	-27.06	WGS84	6	10	2016-09-01	Night	Active aerial searching	sample 02	na	Borges, P.A.V.	1				1	Animalia	Arthropoda	Insecta	Orthoptera	Conocephalidae	Conocephalus	chavesi		Conocephalus chavesi	(Bolivar, 1905)	Conocephalus chavesi (Bolivar, 1905)	species	END	Borges, P. A.V.	2016
DTP Collection_2602	Palearctic	Portugal	Azores	Terceira	Praia da Vitória	Paul do Belo Jardim	Paul do Belo Jardim - Margins; PBJ-T203	38°42’47.95’’N, 27°03’40.93’’W	38.7134	-27.0616	WGS84	5	10	2017-09-13	Day	Sweeping	sample 02	na	Pimentel, C.	20				20	Animalia	Arthropoda	Insecta	Orthoptera	Conocephalidae	Conocephalus	chavesi		Conocephalus chavesi	(Bolivar, 1905)	Conocephalus chavesi (Bolivar, 1905)	species	END	Borges, P. A.V.	2017
DTP Collection_2603	Palearctic	Portugal	Azores	Terceira	Praia da Vitória	Paul da Praia Vitória	Paul da Praia Vitória- Margins; PPV-T200	38°44’06.44’’N, 27°03’36.21’’W	38.735	-27.06	WGS84	6	10	2017-09-13	Day	Sweeping	sample 02	na	Pimentel, C.				2	2	Animalia	Arthropoda	Insecta	Orthoptera	Conocephalidae	Conocephalus	chavesi		Conocephalus chavesi	(Bolivar, 1905)	Conocephalus chavesi (Bolivar, 1905)	species	END	Borges, P. A.V.	2017
DTP Collection_2604	Palearctic	Portugal	Azores	Terceira	Praia da Vitória	Paul da Praia Vitória	Paul da Praia Vitória- Margins; PPV-T200	38°44’06.44’’N, 27°03’36.21’’W	38.735	-27.06	WGS84	6	10	2017-08-31	Night	Active aerial searching	sample 02	na	Brito, M.	1			1	2	Animalia	Arthropoda	Insecta	Orthoptera	Conocephalidae	Conocephalus	chavesi		Conocephalus chavesi	(Bolivar, 1905)	Conocephalus chavesi (Bolivar, 1905)	species	END	Borges, P. A.V.	2017
DTP Collection_2605	Palearctic	Portugal	Azores	Terceira	Praia da Vitória	Paul do Belo Jardim	Paul do Belo Jardim - Margins; PBJ-T203	38°42’47.95’’N, 27°03’40.93’’W	38.7134	-27.0616	WGS84	5	10	2017-08-30	Night	Active aerial searching	sample 02	na	Brito, M.				37	37	Animalia	Arthropoda	Insecta	Orthoptera	Conocephalidae	Conocephalus	chavesi		Conocephalus chavesi	(Bolivar, 1905)	Conocephalus chavesi (Bolivar, 1905)	species	END	Borges, P. A.V.	2017
DTP Collection_2606	Palearctic	Portugal	Azores	Terceira	Praia da Vitória	Paul do Belo Jardim	Paul do Belo Jardim - Margins; PBJ-T203	38°42’47.95’’N, 27°03’40.93’’W	38.7134	-27.0616	WGS84	5	10	2017-08-30	Night	Beating	sample 02	na	Pimentel, C.	11			10	21	Animalia	Arthropoda	Insecta	Orthoptera	Conocephalidae	Conocephalus	chavesi		Conocephalus chavesi	(Bolivar, 1905)	Conocephalus chavesi (Bolivar, 1905)	species	END	Borges, P. A.V.	2017
DTP Collection_3001	Palearctic	Portugal	Azores	Terceira	Praia da Vitória	Paul do Belo Jardim	Paul do Belo Jardim - Margins; PBJ-T203	38°42’47.95’’N, 27°03’40.93’’W	38.7134	-27.0616	WGS84	5	10	2016-09-15	Day	Sweeping	sample 01	na	Goulart, S. & Pimentel, C.	1				1	Animalia	Arthropoda	Insecta	Orthoptera	Conocephalidae	Conocephalus	chavesi		Conocephalus chavesi	(Bolivar, 1905)	Conocephalus chavesi (Bolivar, 1905)	species	END	Borges, P. A.V.	2016
DTP Collection_3002	Palearctic	Portugal	Azores	Terceira	Praia da Vitória	Paul do Belo Jardim	Paul do Belo Jardim - Margins; PBJ-T203	38°42’47.95’’N, 27°03’40.93’’W	38.7134	-27.0616	WGS84	5	10	2016-08-31	Night	Active aerial searching	sample 01	na	Brito, M.	1				1	Animalia	Arthropoda	Insecta	Orthoptera	Conocephalidae	Conocephalus	chavesi		Conocephalus chavesi	(Bolivar, 1905)	Conocephalus chavesi (Bolivar, 1905)	species	END	Borges, P. A.V.	2016
DTP Collection_3003	Palearctic	Portugal	Azores	Terceira	Praia da Vitória	Paul da Praia Vitória	Paul da Praia Vitória- Margins; PPV-T200	38°44’06.44’’N, 27°03’36.21’’W	38.735	-27.06	WGS84	6	10	2016-09-01	Night	Active aerial searching	sample 01	na	Brito, M.	1				1	Animalia	Arthropoda	Insecta	Orthoptera	Conocephalidae	Conocephalus	chavesi		Conocephalus chavesi	(Bolivar, 1905)	Conocephalus chavesi (Bolivar, 1905)	species	END	Borges, P. A.V.	2016
DTP Collection_3004	Palearctic	Portugal	Azores	Terceira	Praia da Vitória	Paul do Belo Jardim	Paul do Belo Jardim - Margins; PBJ-T203	38°42’47.95’’N, 27°03’40.93’’W	38.7134	-27.0616	WGS84	5	10	2017-08-30	Night	Beating	sample 01	na	Borges, P.A.V.				13	13	Animalia	Arthropoda	Insecta	Orthoptera	Conocephalidae	Conocephalus	chavesi		Conocephalus chavesi	(Bolivar, 1905)	Conocephalus chavesi (Bolivar, 1905)	species	END	Borges, P. A.V.	2017
DTP Collection_3005	Palearctic	Portugal	Azores	Terceira	Praia da Vitória	Paul do Belo Jardim	Paul do Belo Jardim - Margins; PBJ-T203	38°42’47.95’’N, 27°03’40.93’’W	38.7134	-27.0616	WGS84	5	10	2017-09-06	Day	Sweeping	sample 01	na	Pimentel, C.	8			1	9	Animalia	Arthropoda	Insecta	Orthoptera	Conocephalidae	Conocephalus	chavesi		Conocephalus chavesi	(Bolivar, 1905)	Conocephalus chavesi (Bolivar, 1905)	species	END	Borges, P. A.V.	2017
DTP Collection_3006	Palearctic	Portugal	Azores	Terceira	Praia da Vitória	Paul da Praia Vitória	Paul da Praia Vitória- Margins; PPV-T200	38°44’06.44’’N, 27°03’36.21’’W	38.735	-27.06	WGS84	6	10	2017-09-06	Day	Sweeping	sample 01	na	Pimentel, C.				2	2	Animalia	Arthropoda	Insecta	Orthoptera	Conocephalidae	Conocephalus	chavesi		Conocephalus chavesi	(Bolivar, 1905)	Conocephalus chavesi (Bolivar, 1905)	species	END	Borges, P. A.V.	2017
DTP Collection_3007	Palearctic	Portugal	Azores	Terceira	Praia da Vitória	Paul da Praia Vitória	Paul da Praia Vitória- Margins; PPV-T200	38°44’06.44’’N, 27°03’36.21’’W	38.735	-27.06	WGS84	6	10	2017-08-31	Night	Active aerial searching	sample 01	na	Pimentel, C.	3			4	7	Animalia	Arthropoda	Insecta	Orthoptera	Conocephalidae	Conocephalus	chavesi		Conocephalus chavesi	(Bolivar, 1905)	Conocephalus chavesi (Bolivar, 1905)	species	END	Borges, P. A.V.	2017
DTP Collection_3008	Palearctic	Portugal	Azores	Terceira	Praia da Vitória	Paul do Belo Jardim	Paul do Belo Jardim - Margins; PBJ-T203	38°42’47.95’’N, 27°03’40.93’’W	38.7134	-27.0616	WGS84	5	10	2017-08-30	Night	Active aerial searching	sample 01	na	Pimentel, C.	9			63	72	Animalia	Arthropoda	Insecta	Orthoptera	Conocephalidae	Conocephalus	chavesi		Conocephalus chavesi	(Bolivar, 1905)	Conocephalus chavesi (Bolivar, 1905)	species	END	Borges, P. A.V.	2017
DTP Collection_23	Palearctic	Portugal	Azores	Terceira	Praia da Vitória	Paul do Belo Jardim	Paul do Belo Jardim - Margins; PBJ-T203	38°42’47.95’’N, 27°03’40.93’’W	38.7134	-27.0616	WGS84	5	10	2017-08-16	Day/Night	Pitfall	sample_ADD2	na	Pimentel, C.	1				1	Animalia	Arthropoda	Insecta	Coleoptera	Staphylinidae	Cordalia	obscura		Cordalia obscura	(Gravenhorst, 1802)	Cordalia obscura (Gravenhorst, 1802)	species	INTR	Borges, P. A.V.	2017
DTP Collection_128	Palearctic	Portugal	Azores	Terceira	Praia da Vitória	Paul da Praia Vitória	Paul da Praia Vitória- Margins; PPV-T200	38°44’06.44’’N, 27°03’36.21’’W	38.735	-27.06	WGS84	6	10	2017-08-23	Day/Night	Pitfall	sample 28	na	Pimentel, C.	1				1	Animalia	Arthropoda	Insecta	Coleoptera	Staphylinidae	Cordalia	obscura		Cordalia obscura	(Gravenhorst, 1802)	Cordalia obscura (Gravenhorst, 1802)	species	INTR	Borges, P. A.V.	2017
DTP Collection_189	Palearctic	Portugal	Azores	Terceira	Praia da Vitória	Paul da Praia Vitória	Paul da Praia Vitória- Margins; PPV-T200	38°44’06.44’’N, 27°03’36.21’’W	38.735	-27.06	WGS84	6	10	2017-08-23	Day/Night	Pitfall	sample 26	na	Pimentel, C.	2				2	Animalia	Arthropoda	Insecta	Coleoptera	Staphylinidae	Cordalia	obscura		Cordalia obscura	(Gravenhorst, 1802)	Cordalia obscura (Gravenhorst, 1802)	species	INTR	Borges, P. A.V.	2017
DTP Collection_311	Palearctic	Portugal	Azores	Terceira	Praia da Vitória	Paul da Praia Vitória	Paul da Praia Vitória- Margins; PPV-T200	38°44’06.44’’N, 27°03’36.21’’W	38.735	-27.06	WGS84	6	10	2017-08-23	Day/Night	Pitfall	sample 22	na	Pimentel, C.	1				1	Animalia	Arthropoda	Insecta	Coleoptera	Staphylinidae	Cordalia	obscura		Cordalia obscura	(Gravenhorst, 1802)	Cordalia obscura (Gravenhorst, 1802)	species	INTR	Borges, P. A.V.	2017
DTP Collection_368	Palearctic	Portugal	Azores	Terceira	Praia da Vitória	Paul do Belo Jardim	Paul do Belo Jardim - Margins; PBJ-T203	38°42’47.95’’N, 27°03’40.93’’W	38.7134	-27.0616	WGS84	5	10	2016-09-07	Day/Night	Pitfall	sample 20	na	Pimentel, C.	1				1	Animalia	Arthropoda	Insecta	Coleoptera	Staphylinidae	Cordalia	obscura		Cordalia obscura	(Gravenhorst, 1802)	Cordalia obscura (Gravenhorst, 1802)	species	INTR	Borges, P. A.V.	2016
DTP Collection_399	Palearctic	Portugal	Azores	Terceira	Praia da Vitória	Paul do Belo Jardim	Paul do Belo Jardim - Margins; PBJ-T203	38°42’47.95’’N, 27°03’40.93’’W	38.7134	-27.0616	WGS84	5	10	2016-09-07	Day/Night	Pitfall	sample 19	na	Pimentel, C.	1				1	Animalia	Arthropoda	Insecta	Coleoptera	Staphylinidae	Cordalia	obscura		Cordalia obscura	(Gravenhorst, 1802)	Cordalia obscura (Gravenhorst, 1802)	species	INTR	Borges, P. A.V.	2016
DTP Collection_428	Palearctic	Portugal	Azores	Terceira	Praia da Vitória	Paul da Praia Vitória	Paul da Praia Vitória- Margins; PPV-T200	38°44’06.44’’N, 27°03’36.21’’W	38.735	-27.06	WGS84	6	10	2017-08-23	Day/Night	Pitfall	sample 18	na	Pimentel, C.	2				2	Animalia	Arthropoda	Insecta	Coleoptera	Staphylinidae	Cordalia	obscura		Cordalia obscura	(Gravenhorst, 1802)	Cordalia obscura (Gravenhorst, 1802)	species	INTR	Borges, P. A.V.	2017
DTP Collection_429	Palearctic	Portugal	Azores	Terceira	Praia da Vitória	Paul do Belo Jardim	Paul do Belo Jardim - Margins; PBJ-T203	38°42’47.95’’N, 27°03’40.93’’W	38.7134	-27.0616	WGS84	5	10	2017-08-16	Day/Night	Pitfall	sample 18	na	Pimentel, C.	2				2	Animalia	Arthropoda	Insecta	Coleoptera	Staphylinidae	Cordalia	obscura		Cordalia obscura	(Gravenhorst, 1802)	Cordalia obscura (Gravenhorst, 1802)	species	INTR	Borges, P. A.V.	2017
DTP Collection_462	Palearctic	Portugal	Azores	Terceira	Praia da Vitória	Paul do Belo Jardim	Paul do Belo Jardim - Margins; PBJ-T203	38°42’47.95’’N, 27°03’40.93’’W	38.7134	-27.0616	WGS84	5	10	2016-09-07	Day/Night	Pitfall	sample 17	na	Pimentel, C.	1				1	Animalia	Arthropoda	Insecta	Coleoptera	Staphylinidae	Cordalia	obscura		Cordalia obscura	(Gravenhorst, 1802)	Cordalia obscura (Gravenhorst, 1802)	species	INTR	Borges, P. A.V.	2016
DTP Collection_463	Palearctic	Portugal	Azores	Terceira	Praia da Vitória	Paul da Praia Vitória	Paul da Praia Vitória- Margins; PPV-T200	38°44’06.44’’N, 27°03’36.21’’W	38.735	-27.06	WGS84	6	10	2017-08-23	Day/Night	Pitfall	sample 17	na	Pimentel, C.	1				1	Animalia	Arthropoda	Insecta	Coleoptera	Staphylinidae	Cordalia	obscura		Cordalia obscura	(Gravenhorst, 1802)	Cordalia obscura (Gravenhorst, 1802)	species	INTR	Borges, P. A.V.	2017
DTP Collection_464	Palearctic	Portugal	Azores	Terceira	Praia da Vitória	Paul do Belo Jardim	Paul do Belo Jardim - Margins; PBJ-T203	38°42’47.95’’N, 27°03’40.93’’W	38.7134	-27.0616	WGS84	5	10	2017-08-16	Day/Night	Pitfall	sample 17	na	Pimentel, C.	5				5	Animalia	Arthropoda	Insecta	Coleoptera	Staphylinidae	Cordalia	obscura		Cordalia obscura	(Gravenhorst, 1802)	Cordalia obscura (Gravenhorst, 1802)	species	INTR	Borges, P. A.V.	2017
DTP Collection_495	Palearctic	Portugal	Azores	Terceira	Praia da Vitória	Paul da Pedreira	Paul da Pedreira; PPCP-T202	38°42’13.09’’N; 27°02’46.37’’W	38.7043	-27.0465	WGS84	3	10	2017-06-30	Day/Night	Pitfall	sample 16	na	Pimentel, C.	1				1	Animalia	Arthropoda	Insecta	Coleoptera	Staphylinidae	Cordalia	obscura		Cordalia obscura	(Gravenhorst, 1802)	Cordalia obscura (Gravenhorst, 1802)	species	INTR	Borges, P. A.V.	2017
DTP Collection_536	Palearctic	Portugal	Azores	Terceira	Praia da Vitória	Paul do Belo Jardim	Paul do Belo Jardim - Margins; PBJ-T203	38°42’47.95’’N, 27°03’40.93’’W	38.7134	-27.0616	WGS84	5	10	2016-09-07	Day/Night	Pitfall	sample 15	na	Pimentel, C.	1				1	Animalia	Arthropoda	Insecta	Coleoptera	Staphylinidae	Cordalia	obscura		Cordalia obscura	(Gravenhorst, 1802)	Cordalia obscura (Gravenhorst, 1802)	species	INTR	Borges, P. A.V.	2016
DTP Collection_537	Palearctic	Portugal	Azores	Terceira	Praia da Vitória	Paul da Praia Vitória	Paul da Praia Vitória- Margins; PPV-T200	38°44’06.44’’N, 27°03’36.21’’W	38.735	-27.06	WGS84	6	10	2016-08-26	Day/Night	Pitfall	sample 15	na	Pimentel, C.	1				1	Animalia	Arthropoda	Insecta	Coleoptera	Staphylinidae	Cordalia	obscura		Cordalia obscura	(Gravenhorst, 1802)	Cordalia obscura (Gravenhorst, 1802)	species	INTR	Borges, P. A.V.	2016
DTP Collection_671	Palearctic	Portugal	Azores	Terceira	Praia da Vitória	Paul do Belo Jardim	Paul do Belo Jardim - Margins; PBJ-T203	38°42’47.95’’N, 27°03’40.93’’W	38.7134	-27.0616	WGS84	5	10	2016-09-07	Day/Night	Pitfall	sample 12	na	Pimentel, C.	1				1	Animalia	Arthropoda	Insecta	Coleoptera	Staphylinidae	Cordalia	obscura		Cordalia obscura	(Gravenhorst, 1802)	Cordalia obscura (Gravenhorst, 1802)	species	INTR	Borges, P. A.V.	2016
DTP Collection_672	Palearctic	Portugal	Azores	Terceira	Praia da Vitória	Paul da Praia Vitória	Paul da Praia Vitória- Margins; PPV-T200	38°44’06.44’’N, 27°03’36.21’’W	38.735	-27.06	WGS84	6	10	2017-08-23	Day/Night	Pitfall	sample 12	na	Pimentel, C.	1				1	Animalia	Arthropoda	Insecta	Coleoptera	Staphylinidae	Cordalia	obscura		Cordalia obscura	(Gravenhorst, 1802)	Cordalia obscura (Gravenhorst, 1802)	species	INTR	Borges, P. A.V.	2017
DTP Collection_731	Palearctic	Portugal	Azores	Terceira	Praia da Vitória	Paul do Belo Jardim	Paul do Belo Jardim - Margins; PBJ-T203	38°42’47.95’’N, 27°03’40.93’’W	38.7134	-27.0616	WGS84	5	10	2017-08-16	Day/Night	Pitfall	sample 11	na	Pimentel, C.	1				1	Animalia	Arthropoda	Insecta	Coleoptera	Staphylinidae	Cordalia	obscura		Cordalia obscura	(Gravenhorst, 1802)	Cordalia obscura (Gravenhorst, 1802)	species	INTR	Borges, P. A.V.	2017
DTP Collection_877	Palearctic	Portugal	Azores	Terceira	Praia da Vitória	Paul do Belo Jardim	Paul do Belo Jardim - Margins; PBJ-T203	38°42’47.95’’N, 27°03’40.93’’W	38.7134	-27.0616	WGS84	5	10	2017-08-16	Day/Night	Pitfall	sample 10	na	Pimentel, C.	8				8	Animalia	Arthropoda	Insecta	Coleoptera	Staphylinidae	Cordalia	obscura		Cordalia obscura	(Gravenhorst, 1802)	Cordalia obscura (Gravenhorst, 1802)	species	INTR	Borges, P. A.V.	2017
DTP Collection_878	Palearctic	Portugal	Azores	Terceira	Praia da Vitória	Paul do Belo Jardim	Paul do Belo Jardim - Stream; PBJ-T204	38°42’47.95’’N, 27°03’40.93’’W	38.7134	-27.0616	WGS84	5	10	2017-08-16	Day/Night	Pitfall	sample 10	na	Pimentel, C.	1				1	Animalia	Arthropoda	Insecta	Coleoptera	Staphylinidae	Cordalia	obscura		Cordalia obscura	(Gravenhorst, 1802)	Cordalia obscura (Gravenhorst, 1802)	species	INTR	Borges, P. A.V.	2017
DTP Collection_1068	Palearctic	Portugal	Azores	Terceira	Praia da Vitória	Paul da Pedreira	Paul da Pedreira; PPCP-T202	38°42’13.09’’N; 27°02’46.37’’W	38.7043	-27.0465	WGS84	3	10	2017-06-30	Day/Night	Pitfall	sample 09	na	Pimentel, C.	1				1	Animalia	Arthropoda	Insecta	Coleoptera	Staphylinidae	Cordalia	obscura		Cordalia obscura	(Gravenhorst, 1802)	Cordalia obscura (Gravenhorst, 1802)	species	INTR	Borges, P. A.V.	2017
DTP Collection_1069	Palearctic	Portugal	Azores	Terceira	Praia da Vitória	Paul do Belo Jardim	Paul do Belo Jardim - Margins; PBJ-T203	38°42’47.95’’N, 27°03’40.93’’W	38.7134	-27.0616	WGS84	5	10	2017-08-16	Day/Night	Pitfall	sample 09	na	Pimentel, C.	1				1	Animalia	Arthropoda	Insecta	Coleoptera	Staphylinidae	Cordalia	obscura		Cordalia obscura	(Gravenhorst, 1802)	Cordalia obscura (Gravenhorst, 1802)	species	INTR	Borges, P. A.V.	2017
DTP Collection_1219	Palearctic	Portugal	Azores	Terceira	Praia da Vitória	Paul do Belo Jardim	Paul do Belo Jardim - Margins; PBJ-T203	38°42’47.95’’N, 27°03’40.93’’W	38.7134	-27.0616	WGS84	5	10	2016-09-07	Day/Night	Pitfall	sample 08	na	Pimentel, C.	2				2	Animalia	Arthropoda	Insecta	Coleoptera	Staphylinidae	Cordalia	obscura		Cordalia obscura	(Gravenhorst, 1802)	Cordalia obscura (Gravenhorst, 1802)	species	INTR	Borges, P. A.V.	2016
DTP Collection_1220	Palearctic	Portugal	Azores	Terceira	Praia da Vitória	Paul da Pedreira	Paul da Pedreira; PPCP-T202	38°42’13.09’’N; 27°02’46.37’’W	38.7043	-27.0465	WGS84	3	10	2017-06-30	Day/Night	Pitfall	sample 08	na	Pimentel, C.	2				2	Animalia	Arthropoda	Insecta	Coleoptera	Staphylinidae	Cordalia	obscura		Cordalia obscura	(Gravenhorst, 1802)	Cordalia obscura (Gravenhorst, 1802)	species	INTR	Borges, P. A.V.	2017
DTP Collection_1221	Palearctic	Portugal	Azores	Terceira	Praia da Vitória	Paul do Belo Jardim	Paul do Belo Jardim - Margins; PBJ-T203	38°42’47.95’’N, 27°03’40.93’’W	38.7134	-27.0616	WGS84	5	10	2017-08-16	Day/Night	Pitfall	sample 08	na	Pimentel, C.	1				1	Animalia	Arthropoda	Insecta	Coleoptera	Staphylinidae	Cordalia	obscura		Cordalia obscura	(Gravenhorst, 1802)	Cordalia obscura (Gravenhorst, 1802)	species	INTR	Borges, P. A.V.	2017
DTP Collection_1371	Palearctic	Portugal	Azores	Terceira	Praia da Vitória	Paul do Belo Jardim	Paul do Belo Jardim - Margins; PBJ-T203	38°42’47.95’’N, 27°03’40.93’’W	38.7134	-27.0616	WGS84	5	10	2016-09-07	Day/Night	Pitfall	sample 07	na	Pimentel, C.	1				1	Animalia	Arthropoda	Insecta	Coleoptera	Staphylinidae	Cordalia	obscura		Cordalia obscura	(Gravenhorst, 1802)	Cordalia obscura (Gravenhorst, 1802)	species	INTR	Borges, P. A.V.	2016
DTP Collection_1372	Palearctic	Portugal	Azores	Terceira	Praia da Vitória	Paul da Praia Vitória	Paul da Praia Vitória- Margins; PPV-T200	38°44’06.44’’N, 27°03’36.21’’W	38.735	-27.06	WGS84	6	10	2016-08-26	Day/Night	Pitfall	sample 07	na	Pimentel, C.	1				1	Animalia	Arthropoda	Insecta	Coleoptera	Staphylinidae	Cordalia	obscura		Cordalia obscura	(Gravenhorst, 1802)	Cordalia obscura (Gravenhorst, 1802)	species	INTR	Borges, P. A.V.	2016
DTP Collection_1544	Palearctic	Portugal	Azores	Terceira	Praia da Vitória	Paul do Belo Jardim	Paul do Belo Jardim - Margins; PBJ-T203	38°42’47.95’’N, 27°03’40.93’’W	38.7134	-27.0616	WGS84	5	10	2016-09-07	Day/Night	Pitfall	sample 06	na	Pimentel, C.	1				1	Animalia	Arthropoda	Insecta	Coleoptera	Staphylinidae	Cordalia	obscura		Cordalia obscura	(Gravenhorst, 1802)	Cordalia obscura (Gravenhorst, 1802)	species	INTR	Borges, P. A.V.	2016
DTP Collection_1545	Palearctic	Portugal	Azores	Terceira	Praia da Vitória	Paul da Praia Vitória	Paul da Praia Vitória- Margins; PPV-T200	38°44’06.44’’N, 27°03’36.21’’W	38.735	-27.06	WGS84	6	10	2016-08-26	Day/Night	Pitfall	sample 06	na	Pimentel, C.	1				1	Animalia	Arthropoda	Insecta	Coleoptera	Staphylinidae	Cordalia	obscura		Cordalia obscura	(Gravenhorst, 1802)	Cordalia obscura (Gravenhorst, 1802)	species	INTR	Borges, P. A.V.	2016
DTP Collection_1546	Palearctic	Portugal	Azores	Terceira	Praia da Vitória	Paul do Belo Jardim	Paul do Belo Jardim - Margins; PBJ-T203	38°42’47.95’’N, 27°03’40.93’’W	38.7134	-27.0616	WGS84	5	10	2017-08-16	Day/Night	Pitfall	sample 06	na	Pimentel, C.	1				1	Animalia	Arthropoda	Insecta	Coleoptera	Staphylinidae	Cordalia	obscura		Cordalia obscura	(Gravenhorst, 1802)	Cordalia obscura (Gravenhorst, 1802)	species	INTR	Borges, P. A.V.	2017
DTP Collection_1721	Palearctic	Portugal	Azores	Terceira	Praia da Vitória	Paul do Belo Jardim	Paul do Belo Jardim - Margins; PBJ-T203	38°42’47.95’’N, 27°03’40.93’’W	38.7134	-27.0616	WGS84	5	10	2016-09-07	Day/Night	Pitfall	sample 05	na	Pimentel, C.	1				1	Animalia	Arthropoda	Insecta	Coleoptera	Staphylinidae	Cordalia	obscura		Cordalia obscura	(Gravenhorst, 1802)	Cordalia obscura (Gravenhorst, 1802)	species	INTR	Borges, P. A.V.	2016
DTP Collection_1722	Palearctic	Portugal	Azores	Terceira	Praia da Vitória	Paul da Praia Vitória	Paul da Praia Vitória- Margins; PPV-T200	38°44’06.44’’N, 27°03’36.21’’W	38.735	-27.06	WGS84	6	10	2016-08-26	Day/Night	Pitfall	sample 05	na	Pimentel, C.	1				1	Animalia	Arthropoda	Insecta	Coleoptera	Staphylinidae	Cordalia	obscura		Cordalia obscura	(Gravenhorst, 1802)	Cordalia obscura (Gravenhorst, 1802)	species	INTR	Borges, P. A.V.	2016
DTP Collection_1723	Palearctic	Portugal	Azores	Terceira	Praia da Vitória	Paul da Praia Vitória	Paul da Praia Vitória - Island; PPV-T201	38°44’06.44’’N, 27°03’36.21’’W	38.735	-27.06	WGS84	6	10	2016-08-26	Day/Night	Pitfall	sample 05	na	Pimentel, C.	1				1	Animalia	Arthropoda	Insecta	Coleoptera	Staphylinidae	Cordalia	obscura		Cordalia obscura	(Gravenhorst, 1802)	Cordalia obscura (Gravenhorst, 1802)	species	INTR	Borges, P. A.V.	2016
DTP Collection_2024	Palearctic	Portugal	Azores	Terceira	Praia da Vitória	Paul da Pedreira	Paul da Pedreira; PPCP-T202	38°42’13.09’’N; 27°02’46.37’’W	38.7043	-27.0465	WGS84	3	10	2017-06-30	Day/Night	Pitfall	sample 04	na	Pimentel, C.	1				1	Animalia	Arthropoda	Insecta	Coleoptera	Staphylinidae	Cordalia	obscura		Cordalia obscura	(Gravenhorst, 1802)	Cordalia obscura (Gravenhorst, 1802)	species	INTR	Borges, P. A.V.	2017
DTP Collection_2776	Palearctic	Portugal	Azores	Terceira	Praia da Vitória	Paul do Belo Jardim	Paul do Belo Jardim - Margins; PBJ-T203	38°42’47.95’’N, 27°03’40.93’’W	38.7134	-27.0616	WGS84	5	10	2016-09-07	Day/Night	Pitfall	sample 02	na	Pimentel, C.	1				1	Animalia	Arthropoda	Insecta	Coleoptera	Staphylinidae	Cordalia	obscura		Cordalia obscura	(Gravenhorst, 1802)	Cordalia obscura (Gravenhorst, 1802)	species	INTR	Borges, P. A.V.	2016
DTP Collection_2777	Palearctic	Portugal	Azores	Terceira	Praia da Vitória	Paul do Belo Jardim	Paul do Belo Jardim - Margins; PBJ-T203	38°42’47.95’’N, 27°03’40.93’’W	38.7134	-27.0616	WGS84	5	10	2016-09-15	Day	Sweeping	sample 02	na	Goulart, S. & Pimentel, C.	1				1	Animalia	Arthropoda	Insecta	Coleoptera	Staphylinidae	Cordalia	obscura		Cordalia obscura	(Gravenhorst, 1802)	Cordalia obscura (Gravenhorst, 1802)	species	INTR	Borges, P. A.V.	2016
DTP Collection_3179	Palearctic	Portugal	Azores	Terceira	Praia da Vitória	Paul do Belo Jardim	Paul do Belo Jardim - Margins; PBJ-T203	38°42’47.95’’N, 27°03’40.93’’W	38.7134	-27.0616	WGS84	5	10	2016-09-07	Day/Night	Pitfall	sample 01	na	Pimentel, C.	5				5	Animalia	Arthropoda	Insecta	Coleoptera	Staphylinidae	Cordalia	obscura		Cordalia obscura	(Gravenhorst, 1802)	Cordalia obscura (Gravenhorst, 1802)	species	INTR	Borges, P. A.V.	2016
DTP Collection_3180	Palearctic	Portugal	Azores	Terceira	Praia da Vitória	Paul da Praia Vitória	Paul da Praia Vitória- Margins; PPV-T200	38°44’06.44’’N, 27°03’36.21’’W	38.735	-27.06	WGS84	6	10	2016-08-26	Day/Night	Pitfall	sample 01	na	Pimentel, C.	2				2	Animalia	Arthropoda	Insecta	Coleoptera	Staphylinidae	Cordalia	obscura		Cordalia obscura	(Gravenhorst, 1802)	Cordalia obscura (Gravenhorst, 1802)	species	INTR	Borges, P. A.V.	2016
DTP Collection_3181	Palearctic	Portugal	Azores	Terceira	Praia da Vitória	Paul do Belo Jardim	Paul do Belo Jardim - Margins; PBJ-T203	38°42’47.95’’N, 27°03’40.93’’W	38.7134	-27.0616	WGS84	5	10	2017-08-30	Night	Beating	sample 01	na	Borges, P.A.V.			4		4	Animalia	Arthropoda	Insecta	Coleoptera	Staphylinidae	Creophilus	maxillosus	maxillosus	Creophilus maxillosus maxillosus	(Linnaeus, 1758)	Creophilus maxillosus maxillosus (Linnaeus, 1758)	subspecies	INTR	Borges, P. A.V.	2017
DTP Collection_520	Palearctic	Portugal	Azores	Terceira	Praia da Vitória	Paul da Praia Vitória	Paul da Praia Vitória - Island; PPV-T201	38°44’06.44’’N, 27°03’36.21’’W	38.735	-27.06	WGS84	6	10	2016-08-26	Day/Night	Pitfall	sample 15	na	Pimentel, C.			1		1	Animalia	Arthropoda	Arachnida	Araneae	Theridiidae	Cryptachaea	blattea		Cryptachaea blattea	(Urquhart, 1886)	Cryptachaea blattea (Urquhart, 1886)	species	INTR	Borges, P. A.V.	2016
DTP Collection_799	Palearctic	Portugal	Azores	Terceira	Praia da Vitória	Paul da Praia Vitória	Paul da Praia Vitória - Island; PPV-T201	38°44’06.44’’N, 27°03’36.21’’W	38.735	-27.06	WGS84	6	10	2016-08-26	Day/Night	Pitfall	sample 10	na	Pimentel, C.			2		2	Animalia	Arthropoda	Arachnida	Araneae	Theridiidae	Cryptachaea	blattea		Cryptachaea blattea	(Urquhart, 1886)	Cryptachaea blattea (Urquhart, 1886)	species	INTR	Borges, P. A.V.	2016
DTP Collection_1301	Palearctic	Portugal	Azores	Terceira	Praia da Vitória	Paul da Praia Vitória	Paul da Praia Vitória- Margins; PPV-T200	38°44’06.44’’N, 27°03’36.21’’W	38.735	-27.06	WGS84	6	10	2016-08-26	Day/Night	Pitfall	sample 07	na	Pimentel, C.				1	1	Animalia	Arthropoda	Arachnida	Araneae	Theridiidae	Cryptachaea	blattea		Cryptachaea blattea	(Urquhart, 1886)	Cryptachaea blattea (Urquhart, 1886)	species	INTR	Borges, P. A.V.	2016
DTP Collection_2194	Palearctic	Portugal	Azores	Terceira	Praia da Vitória	Paul da Praia Vitória	Paul da Praia Vitória- Margins; PPV-T200	38°44’06.44’’N, 27°03’36.21’’W	38.735	-27.06	WGS84	6	10	2016-08-26	Day/Night	Pitfall	sample 03	na	Pimentel, C.				1	1	Animalia	Arthropoda	Arachnida	Araneae	Theridiidae	Cryptachaea	blattea		Cryptachaea blattea	(Urquhart, 1886)	Cryptachaea blattea (Urquhart, 1886)	species	INTR	Borges, P. A.V.	2016
DTP Collection_2554	Palearctic	Portugal	Azores	Terceira	Praia da Vitória	Paul da Praia Vitória	Paul da Praia Vitória- Margins; PPV-T200	38°44’06.44’’N, 27°03’36.21’’W	38.735	-27.06	WGS84	6	10	2017-08-31	Night	Beating	sample 02	na	Borges, P.A.V.				1	1	Animalia	Arthropoda	Arachnida	Araneae	Theridiidae	Cryptachaea	blattea		Cryptachaea blattea	(Urquhart, 1886)	Cryptachaea blattea (Urquhart, 1886)	species	INTR	Borges, P. A.V.	2017
DTP Collection_611	Palearctic	Portugal	Azores	Terceira	Praia da Vitória	Paul da Praia Vitória	Paul da Praia Vitória- Margins; PPV-T200	38°44’06.44’’N, 27°03’36.21’’W	38.735	-27.06	WGS84	6	10	2017-08-23	Day/Night	Pitfall	sample 13	na	Pimentel, C.	1				1	Animalia	Arthropoda	Insecta	Coleoptera	Silvanidae	Cryptamorpha	desjardinsii		Cryptamorpha desjardinsii	(Guérin-Méneville, 1844)	Cryptamorpha desjardinsii (Guérin-Méneville, 1844)	species	INTR	Borges, P. A.V.	2017
DTP Collection_873	Palearctic	Portugal	Azores	Terceira	Praia da Vitória	Paul da Praia Vitória	Paul da Praia Vitória- Margins; PPV-T200	38°44’06.44’’N, 27°03’36.21’’W	38.735	-27.06	WGS84	6	10	2016-08-30	Day	Beating	sample 10	Arundo donax	Pimentel, C.	1				1	Animalia	Arthropoda	Insecta	Coleoptera	Silvanidae	Cryptamorpha	desjardinsii		Cryptamorpha desjardinsii	(Guérin-Méneville, 1844)	Cryptamorpha desjardinsii (Guérin-Méneville, 1844)	species	INTR	Borges, P. A.V.	2016
DTP Collection_874	Palearctic	Portugal	Azores	Terceira	Praia da Vitória	Paul do Belo Jardim	Paul do Belo Jardim - Margins; PBJ-T203	38°42’47.95’’N, 27°03’40.93’’W	38.7134	-27.0616	WGS84	5	10	2016-08-08	Day	Beating	sample 10	Arundo donax	Pimentel, C.	1				1	Animalia	Arthropoda	Insecta	Coleoptera	Silvanidae	Cryptamorpha	desjardinsii		Cryptamorpha desjardinsii	(Guérin-Méneville, 1844)	Cryptamorpha desjardinsii (Guérin-Méneville, 1844)	species	INTR	Borges, P. A.V.	2016
DTP Collection_1062	Palearctic	Portugal	Azores	Terceira	Praia da Vitória	Paul da Pedreira	Paul da Pedreira; PPCP-T202	38°42’13.09’’N; 27°02’46.37’’W	38.7043	-27.0465	WGS84	3	10	2016-08-30	Day	Beating	sample 09	Arundo donax	Pimentel, C.	1				1	Animalia	Arthropoda	Insecta	Coleoptera	Silvanidae	Cryptamorpha	desjardinsii		Cryptamorpha desjardinsii	(Guérin-Méneville, 1844)	Cryptamorpha desjardinsii (Guérin-Méneville, 1844)	species	INTR	Borges, P. A.V.	2016
DTP Collection_1063	Palearctic	Portugal	Azores	Terceira	Praia da Vitória	Paul do Belo Jardim	Paul do Belo Jardim - Margins; PBJ-T203	38°42’47.95’’N, 27°03’40.93’’W	38.7134	-27.0616	WGS84	5	10	2017-08-03	Day	Beating	sample 09	Arundo donax	Pimentel, C.	1				1	Animalia	Arthropoda	Insecta	Coleoptera	Silvanidae	Cryptamorpha	desjardinsii		Cryptamorpha desjardinsii	(Guérin-Méneville, 1844)	Cryptamorpha desjardinsii (Guérin-Méneville, 1844)	species	INTR	Borges, P. A.V.	2017
DTP Collection_1064	Palearctic	Portugal	Azores	Terceira	Praia da Vitória	Paul da Praia Vitória	Paul da Praia Vitória- Margins; PPV-T200	38°44’06.44’’N, 27°03’36.21’’W	38.735	-27.06	WGS84	6	10	2017-08-23	Day/Night	Pitfall	sample 09	na	Pimentel, C.	1				1	Animalia	Arthropoda	Insecta	Coleoptera	Silvanidae	Cryptamorpha	desjardinsii		Cryptamorpha desjardinsii	(Guérin-Méneville, 1844)	Cryptamorpha desjardinsii (Guérin-Méneville, 1844)	species	INTR	Borges, P. A.V.	2017
DTP Collection_1065	Palearctic	Portugal	Azores	Terceira	Praia da Vitória	Paul da Pedreira	Paul da Pedreira; PPCP-T202	38°42’13.09’’N; 27°02’46.37’’W	38.7043	-27.0465	WGS84	3	10	2017-06-28	Day	Beating	sample 09	Arundo donax	Pimentel, C.	2				2	Animalia	Arthropoda	Insecta	Coleoptera	Silvanidae	Cryptamorpha	desjardinsii		Cryptamorpha desjardinsii	(Guérin-Méneville, 1844)	Cryptamorpha desjardinsii (Guérin-Méneville, 1844)	species	INTR	Borges, P. A.V.	2017
DTP Collection_1213	Palearctic	Portugal	Azores	Terceira	Praia da Vitória	Paul da Praia Vitória	Paul da Praia Vitória- Margins; PPV-T200	38°44’06.44’’N, 27°03’36.21’’W	38.735	-27.06	WGS84	6	10	2017-08-09	Day	Beating	sample 08	Arundo donax	Pimentel, C.	2				2	Animalia	Arthropoda	Insecta	Coleoptera	Silvanidae	Cryptamorpha	desjardinsii		Cryptamorpha desjardinsii	(Guérin-Méneville, 1844)	Cryptamorpha desjardinsii (Guérin-Méneville, 1844)	species	INTR	Borges, P. A.V.	2017
DTP Collection_1214	Palearctic	Portugal	Azores	Terceira	Praia da Vitória	Paul do Belo Jardim	Paul do Belo Jardim - Margins; PBJ-T203	38°42’47.95’’N, 27°03’40.93’’W	38.7134	-27.0616	WGS84	5	10	2017-08-03	Day	Beating	sample 08	Juncus acutus	Pimentel, C.	1				1	Animalia	Arthropoda	Insecta	Coleoptera	Silvanidae	Cryptamorpha	desjardinsii		Cryptamorpha desjardinsii	(Guérin-Méneville, 1844)	Cryptamorpha desjardinsii (Guérin-Méneville, 1844)	species	INTR	Borges, P. A.V.	2017
DTP Collection_1367	Palearctic	Portugal	Azores	Terceira	Praia da Vitória	Paul da Praia Vitória	Paul da Praia Vitória- Margins; PPV-T200	38°44’06.44’’N, 27°03’36.21’’W	38.735	-27.06	WGS84	6	10	2016-08-30	Day	Beating	sample 07	Arundo donax	Pimentel, C.	3				3	Animalia	Arthropoda	Insecta	Coleoptera	Silvanidae	Cryptamorpha	desjardinsii		Cryptamorpha desjardinsii	(Guérin-Méneville, 1844)	Cryptamorpha desjardinsii (Guérin-Méneville, 1844)	species	INTR	Borges, P. A.V.	2016
DTP Collection_1368	Palearctic	Portugal	Azores	Terceira	Praia da Vitória	Paul do Belo Jardim	Paul do Belo Jardim - Margins; PBJ-T203	38°42’47.95’’N, 27°03’40.93’’W	38.7134	-27.0616	WGS84	5	10	2016-08-08	Day	Beating	sample 07	Arundo donax	Pimentel, C.	1				1	Animalia	Arthropoda	Insecta	Coleoptera	Silvanidae	Cryptamorpha	desjardinsii		Cryptamorpha desjardinsii	(Guérin-Méneville, 1844)	Cryptamorpha desjardinsii (Guérin-Méneville, 1844)	species	INTR	Borges, P. A.V.	2016
DTP Collection_1541	Palearctic	Portugal	Azores	Terceira	Praia da Vitória	Paul da Praia Vitória	Paul da Praia Vitória- Margins; PPV-T200	38°44’06.44’’N, 27°03’36.21’’W	38.735	-27.06	WGS84	6	10	2016-08-30	Day	Beating	sample 06	Arundo donax	Pimentel, C.	1				1	Animalia	Arthropoda	Insecta	Coleoptera	Silvanidae	Cryptamorpha	desjardinsii		Cryptamorpha desjardinsii	(Guérin-Méneville, 1844)	Cryptamorpha desjardinsii (Guérin-Méneville, 1844)	species	INTR	Borges, P. A.V.	2016
DTP Collection_1714	Palearctic	Portugal	Azores	Terceira	Praia da Vitória	Paul da Praia Vitória	Paul da Praia Vitória- Margins; PPV-T200	38°44’06.44’’N, 27°03’36.21’’W	38.735	-27.06	WGS84	6	10	2016-08-30	Day	Beating	sample 05	Arundo donax	Pimentel, C.	2				2	Animalia	Arthropoda	Insecta	Coleoptera	Silvanidae	Cryptamorpha	desjardinsii		Cryptamorpha desjardinsii	(Guérin-Méneville, 1844)	Cryptamorpha desjardinsii (Guérin-Méneville, 1844)	species	INTR	Borges, P. A.V.	2016
DTP Collection_1715	Palearctic	Portugal	Azores	Terceira	Praia da Vitória	Paul do Belo Jardim	Paul do Belo Jardim - Margins; PBJ-T203	38°42’47.95’’N, 27°03’40.93’’W	38.7134	-27.0616	WGS84	5	10	2016-08-08	Day	Beating	sample 05	Arundo donax	Pimentel, C.	1				1	Animalia	Arthropoda	Insecta	Coleoptera	Silvanidae	Cryptamorpha	desjardinsii		Cryptamorpha desjardinsii	(Guérin-Méneville, 1844)	Cryptamorpha desjardinsii (Guérin-Méneville, 1844)	species	INTR	Borges, P. A.V.	2016
DTP Collection_1716	Palearctic	Portugal	Azores	Terceira	Praia da Vitória	Paul da Praia Vitória	Paul da Praia Vitória- Margins; PPV-T200	38°44’06.44’’N, 27°03’36.21’’W	38.735	-27.06	WGS84	6	10	2017-08-09	Day	Beating	sample 05	Arundo donax	Pimentel, C.	1				1	Animalia	Arthropoda	Insecta	Coleoptera	Silvanidae	Cryptamorpha	desjardinsii		Cryptamorpha desjardinsii	(Guérin-Méneville, 1844)	Cryptamorpha desjardinsii (Guérin-Méneville, 1844)	species	INTR	Borges, P. A.V.	2017
DTP Collection_2020	Palearctic	Portugal	Azores	Terceira	Praia da Vitória	Paul da Praia Vitória	Paul da Praia Vitória- Margins; PPV-T200	38°44’06.44’’N, 27°03’36.21’’W	38.735	-27.06	WGS84	6	10	2017-08-31	Night	Sweeping	sample 04	na	Brito, M.	1				1	Animalia	Arthropoda	Insecta	Coleoptera	Silvanidae	Cryptamorpha	desjardinsii		Cryptamorpha desjardinsii	(Guérin-Méneville, 1844)	Cryptamorpha desjardinsii (Guérin-Méneville, 1844)	species	INTR	Borges, P. A.V.	2017
DTP Collection_2021	Palearctic	Portugal	Azores	Terceira	Praia da Vitória	Paul da Pedreira	Paul da Pedreira; PPCP-T202	38°42’13.09’’N; 27°02’46.37’’W	38.7043	-27.0465	WGS84	3	10	2017-06-21	Night	Active aerial searching	sample 04	na	Gabriel, R.	1				1	Animalia	Arthropoda	Insecta	Coleoptera	Silvanidae	Cryptamorpha	desjardinsii		Cryptamorpha desjardinsii	(Guérin-Méneville, 1844)	Cryptamorpha desjardinsii (Guérin-Méneville, 1844)	species	INTR	Borges, P. A.V.	2017
DTP Collection_2363	Palearctic	Portugal	Azores	Terceira	Praia da Vitória	Paul da Praia Vitória	Paul da Praia Vitória- Margins; PPV-T200	38°44’06.44’’N, 27°03’36.21’’W	38.735	-27.06	WGS84	6	10	2016-08-30	Day	Beating	sample 03	Arundo donax	Pimentel, C.	1				1	Animalia	Arthropoda	Insecta	Coleoptera	Silvanidae	Cryptamorpha	desjardinsii		Cryptamorpha desjardinsii	(Guérin-Méneville, 1844)	Cryptamorpha desjardinsii (Guérin-Méneville, 1844)	species	INTR	Borges, P. A.V.	2016
DTP Collection_2364	Palearctic	Portugal	Azores	Terceira	Praia da Vitória	Paul da Praia Vitória	Paul da Praia Vitória- Margins; PPV-T200	38°44’06.44’’N, 27°03’36.21’’W	38.735	-27.06	WGS84	6	10	2017-08-09	Day	Beating	sample 03	Arundo donax	Pimentel, C.	1				1	Animalia	Arthropoda	Insecta	Coleoptera	Silvanidae	Cryptamorpha	desjardinsii		Cryptamorpha desjardinsii	(Guérin-Méneville, 1844)	Cryptamorpha desjardinsii (Guérin-Méneville, 1844)	species	INTR	Borges, P. A.V.	2017
DTP Collection_2365	Palearctic	Portugal	Azores	Terceira	Praia da Vitória	Paul da Praia Vitória	Paul da Praia Vitória- Margins; PPV-T200	38°44’06.44’’N, 27°03’36.21’’W	38.735	-27.06	WGS84	6	10	2017-08-31	Night	Sweeping	sample 03	na	Gabriel, R.	1				1	Animalia	Arthropoda	Insecta	Coleoptera	Silvanidae	Cryptamorpha	desjardinsii		Cryptamorpha desjardinsii	(Guérin-Méneville, 1844)	Cryptamorpha desjardinsii (Guérin-Méneville, 1844)	species	INTR	Borges, P. A.V.	2017
DTP Collection_2769	Palearctic	Portugal	Azores	Terceira	Praia da Vitória	Paul do Belo Jardim	Paul do Belo Jardim - Margins; PBJ-T203	38°42’47.95’’N, 27°03’40.93’’W	38.7134	-27.0616	WGS84	5	10	2016-08-08	Day	Beating	sample 02	Arundo donax	Pimentel, C.	1				1	Animalia	Arthropoda	Insecta	Coleoptera	Silvanidae	Cryptamorpha	desjardinsii		Cryptamorpha desjardinsii	(Guérin-Méneville, 1844)	Cryptamorpha desjardinsii (Guérin-Méneville, 1844)	species	INTR	Borges, P. A.V.	2016
DTP Collection_2770	Palearctic	Portugal	Azores	Terceira	Praia da Vitória	Paul da Pedreira	Paul da Pedreira; PPCP-T202	38°42’13.09’’N; 27°02’46.37’’W	38.7043	-27.0465	WGS84	3	10	2016-08-30	Day	Beating	sample 02	Arundo donax	Pimentel, C.	2				2	Animalia	Arthropoda	Insecta	Coleoptera	Silvanidae	Cryptamorpha	desjardinsii		Cryptamorpha desjardinsii	(Guérin-Méneville, 1844)	Cryptamorpha desjardinsii (Guérin-Méneville, 1844)	species	INTR	Borges, P. A.V.	2016
DTP Collection_2771	Palearctic	Portugal	Azores	Terceira	Praia da Vitória	Paul da Pedreira	Paul da Pedreira; PPCP-T202	38°42’13.09’’N; 27°02’46.37’’W	38.7043	-27.0465	WGS84	3	10	2016-08-31	Night	Active aerial searching	sample 02	na	Borges, P.A.V.	1				1	Animalia	Arthropoda	Insecta	Coleoptera	Silvanidae	Cryptamorpha	desjardinsii		Cryptamorpha desjardinsii	(Guérin-Méneville, 1844)	Cryptamorpha desjardinsii (Guérin-Méneville, 1844)	species	INTR	Borges, P. A.V.	2016
DTP Collection_2772	Palearctic	Portugal	Azores	Terceira	Praia da Vitória	Paul da Praia Vitória	Paul da Praia Vitória- Margins; PPV-T200	38°44’06.44’’N, 27°03’36.21’’W	38.735	-27.06	WGS84	6	10	2017-08-09	Day	Beating	sample 02	Arundo donax	Pimentel, C.	3				3	Animalia	Arthropoda	Insecta	Coleoptera	Silvanidae	Cryptamorpha	desjardinsii		Cryptamorpha desjardinsii	(Guérin-Méneville, 1844)	Cryptamorpha desjardinsii (Guérin-Méneville, 1844)	species	INTR	Borges, P. A.V.	2017
DTP Collection_2773	Palearctic	Portugal	Azores	Terceira	Praia da Vitória	Paul da Praia Vitória	Paul da Praia Vitória- Margins; PPV-T200	38°44’06.44’’N, 27°03’36.21’’W	38.735	-27.06	WGS84	6	10	2017-08-31	Night	Beating	sample 02	na	Borges, P.A.V.	1				1	Animalia	Arthropoda	Insecta	Coleoptera	Silvanidae	Cryptamorpha	desjardinsii		Cryptamorpha desjardinsii	(Guérin-Méneville, 1844)	Cryptamorpha desjardinsii (Guérin-Méneville, 1844)	species	INTR	Borges, P. A.V.	2017
DTP Collection_3174	Palearctic	Portugal	Azores	Terceira	Praia da Vitória	Paul da Praia Vitória	Paul da Praia Vitória- Margins; PPV-T200	38°44’06.44’’N, 27°03’36.21’’W	38.735	-27.06	WGS84	6	10	2017-08-09	Day	Beating	sample 01	Arundo donax	Pimentel, C.	1				1	Animalia	Arthropoda	Insecta	Coleoptera	Silvanidae	Cryptamorpha	desjardinsii		Cryptamorpha desjardinsii	(Guérin-Méneville, 1844)	Cryptamorpha desjardinsii (Guérin-Méneville, 1844)	species	INTR	Borges, P. A.V.	2017
DTP Collection_3175	Palearctic	Portugal	Azores	Terceira	Praia da Vitória	Paul do Belo Jardim	Paul do Belo Jardim - Margins; PBJ-T203	38°42’47.95’’N, 27°03’40.93’’W	38.7134	-27.0616	WGS84	5	10	2017-08-03	Day	Beating	sample 01	Arundo donax	Pimentel, C.	2				2	Animalia	Arthropoda	Insecta	Coleoptera	Silvanidae	Cryptamorpha	desjardinsii		Cryptamorpha desjardinsii	(Guérin-Méneville, 1844)	Cryptamorpha desjardinsii (Guérin-Méneville, 1844)	species	INTR	Borges, P. A.V.	2017
DTP Collection_2985	Palearctic	Portugal	Azores	Terceira	Praia da Vitória	Paul da Pedreira	Paul da Pedreira; PPCP-T202	38°42’13.09’’N; 27°02’46.37’’W	38.7043	-27.0465	WGS84	3	10	2017-06-21	Night	Beating	sample 01	na	Pimentel, C.	1				1	Animalia	Arthropoda	Insecta	Zygentoma	Lepismatidae	Ctenolepisma	longicaudata		Ctenolepisma longicaudata	Escherich, 1905	Ctenolepisma longicaudata Escherich, 1905	species	INTR	Borges, P. A.V.	2017
DTP Collection_647	Palearctic	Portugal	Azores	Terceira	Praia da Vitória	Paul da Praia Vitória	Paul da Praia Vitória- Margins; PPV-T200	38°44’06.44’’N, 27°03’36.21’’W	38.735	-27.06	WGS84	6	10	2016-08-26	Day/Night	Pitfall	sample 12	na	Pimentel, C.	1				1	Animalia	Arthropoda	Diplopoda	Julida	Julidae	Cylindroiulus	latestriatus		Cylindroiulus latestriatus	(Curtis, 1845)	Cylindroiulus latestriatus (Curtis, 1845)	species	INTR	Borges, P. A.V.	2016
DTP Collection_983	Palearctic	Portugal	Azores	Terceira	Praia da Vitória	Paul da Praia Vitória	Paul da Praia Vitória- Margins; PPV-T200	38°44’06.44’’N, 27°03’36.21’’W	38.735	-27.06	WGS84	6	10	2016-08-26	Day/Night	Pitfall	sample 09	na	Pimentel, C.	1				1	Animalia	Arthropoda	Diplopoda	Julida	Julidae	Cylindroiulus	latestriatus		Cylindroiulus latestriatus	(Curtis, 1845)	Cylindroiulus latestriatus (Curtis, 1845)	species	INTR	Borges, P. A.V.	2016
DTP Collection_3057	Palearctic	Portugal	Azores	Terceira	Praia da Vitória	Paul da Praia Vitória	Paul da Praia Vitória- Margins; PPV-T200	38°44’06.44’’N, 27°03’36.21’’W	38.735	-27.06	WGS84	6	10	2017-09-06	Day	Sweeping	sample 01	na	Pimentel, C.	1				1	Animalia	Arthropoda	Insecta	Hemiptera	Flatidae	Cyphopterum	adcendens		Cyphopterum adcendens	(Herr.-Schaff., 1835)	Cyphopterum adcendens (Herr.-Schaff., 1835)	species	NAT	Borges, P. A.V.	2017
DTP Collection_1882	Palearctic	Portugal	Azores	Terceira	Praia da Vitória	Paul do Belo Jardim	Paul do Belo Jardim - Margins; PBJ-T203	38°42’47.95’’N, 27°03’40.93’’W	38.7134	-27.0616	WGS84	5	10	2017-08-30	Night	Sweeping	sample 04	na	Gabriel, R.	1				1	Animalia	Arthropoda	Insecta	Microcoryphia	Machilidae	Dilta	saxicola		Dilta saxicola	(Womersley, 1930)	Dilta saxicola (Womersley, 1930)	species	NAT	Borges, P. A.V.	2017
DTP Collection_2587	Palearctic	Portugal	Azores	Terceira	Praia da Vitória	Paul da Pedreira	Paul da Pedreira; PPCP-T202	38°42’13.09’’N; 27°02’46.37’’W	38.7043	-27.0465	WGS84	3	10	2017-06-21	Night	Beating	sample 02	na	Borges, P.A.V.	1			1	2	Animalia	Arthropoda	Insecta	Microcoryphia	Machilidae	Dilta	saxicola		Dilta saxicola	(Womersley, 1930)	Dilta saxicola (Womersley, 1930)	species	NAT	Borges, P. A.V.	2017
DTP Collection_2588	Palearctic	Portugal	Azores	Terceira	Praia da Vitória	Paul do Belo Jardim	Paul do Belo Jardim - Margins; PBJ-T203	38°42’47.95’’N, 27°03’40.93’’W	38.7134	-27.0616	WGS84	5	10	2017-08-30	Night	Beating	sample 02	na	Pimentel, C.	1				1	Animalia	Arthropoda	Insecta	Microcoryphia	Machilidae	Dilta	saxicola		Dilta saxicola	(Womersley, 1930)	Dilta saxicola (Womersley, 1930)	species	NAT	Borges, P. A.V.	2017
DTP Collection_1972	Palearctic	Portugal	Azores	Terceira	Praia da Vitória	Paul do Belo Jardim	Paul do Belo Jardim - Margins; PBJ-T203	38°42’47.95’’N, 27°03’40.93’’W	38.7134	-27.0616	WGS84	5	10	2016-08-31	Night	Active aerial searching	sample 04	na	Gabriel, R.	2				2	Animalia	Arthropoda	Insecta	Coleoptera	Curculionidae	Drouetius	oceanicus	oceanicus	Drouetius oceanicus oceanicus	Machado, 2009	Drouetius oceanicus oceanicus Machado, 2009	subspecies	END	Borges, P. A.V.	2016
DTP Collection_3129	Palearctic	Portugal	Azores	Terceira	Praia da Vitória	Paul do Belo Jardim	Paul do Belo Jardim - Margins; PBJ-T203	38°42’47.95’’N, 27°03’40.93’’W	38.7134	-27.0616	WGS84	5	10	2016-08-31	Night	Active aerial searching	sample 01	na	Brito, M.	1				1	Animalia	Arthropoda	Insecta	Coleoptera	Curculionidae	Drouetius	oceanicus	oceanicus	Drouetius oceanicus oceanicus	Machado, 2009	Drouetius oceanicus oceanicus Machado, 2009	subspecies	END	Borges, P. A.V.	2016
DTP Collection_3130	Palearctic	Portugal	Azores	Terceira	Praia da Vitória	Paul do Belo Jardim	Paul do Belo Jardim - Margins; PBJ-T203	38°42’47.95’’N, 27°03’40.93’’W	38.7134	-27.0616	WGS84	5	10	2017-08-30	Night	Beating	sample 01	na	Borges, P.A.V.	2				2	Animalia	Arthropoda	Insecta	Coleoptera	Curculionidae	Drouetius	oceanicus	oceanicus	Drouetius oceanicus oceanicus	Machado, 2009	Drouetius oceanicus oceanicus Machado, 2009	subspecies	END	Borges, P. A.V.	2017
DTP Collection_4	Palearctic	Portugal	Azores	Terceira	Praia da Vitória	Paul do Belo Jardim	Paul do Belo Jardim - Margins; PBJ-T203	38°42’47.95’’N, 27°03’40.93’’W	38.7134	-27.0616	WGS84	5	10	2017-08-16	Day/Night	Pitfall	sample_ADD3	na	Pimentel, C.			1		1	Animalia	Arthropoda	Arachnida	Araneae	Dysderidae	Dysdera	crocata		Dysdera crocata	C.L. Koch, 1838	Dysdera crocata C.L. Koch, 1838	species	INTR	Borges, P. A.V.	2017
DTP Collection_15	Palearctic	Portugal	Azores	Terceira	Praia da Vitória	Paul do Belo Jardim	Paul do Belo Jardim - Margins; PBJ-T203	38°42’47.95’’N, 27°03’40.93’’W	38.7134	-27.0616	WGS84	5	10	2017-08-16	Day/Night	Pitfall	sample_ADD2	na	Pimentel, C.				1	1	Animalia	Arthropoda	Arachnida	Araneae	Dysderidae	Dysdera	crocata		Dysdera crocata	C.L. Koch, 1838	Dysdera crocata C.L. Koch, 1838	species	INTR	Borges, P. A.V.	2017
DTP Collection_37	Palearctic	Portugal	Azores	Terceira	Praia da Vitória	Paul da Praia Vitória	Paul da Praia Vitória- Margins; PPV-T200	38°44’06.44’’N, 27°03’36.21’’W	38.735	-27.06	WGS84	6	10	2017-08-23	Day/Night	Pitfall	sample 30	na	Pimentel, C.				1	1	Animalia	Arthropoda	Arachnida	Araneae	Dysderidae	Dysdera	crocata		Dysdera crocata	C.L. Koch, 1838	Dysdera crocata C.L. Koch, 1838	species	INTR	Borges, P. A.V.	2017
DTP Collection_167	Palearctic	Portugal	Azores	Terceira	Praia da Vitória	Paul da Pedreira	Paul da Pedreira; PPCP-T202	38°42’13.09’’N; 27°02’46.37’’W	38.7043	-27.0465	WGS84	3	10	2017-06-30	Day/Night	Pitfall	sample 26	na	Pimentel, C.			1		1	Animalia	Arthropoda	Arachnida	Araneae	Dysderidae	Dysdera	crocata		Dysdera crocata	C.L. Koch, 1838	Dysdera crocata C.L. Koch, 1838	species	INTR	Borges, P. A.V.	2017
DTP Collection_202	Palearctic	Portugal	Azores	Terceira	Praia da Vitória	Paul da Praia Vitória	Paul da Praia Vitória- Margins; PPV-T200	38°44’06.44’’N, 27°03’36.21’’W	38.735	-27.06	WGS84	6	10	2017-08-23	Day/Night	Pitfall	sample 25	na	Pimentel, C.	2				2	Animalia	Arthropoda	Arachnida	Araneae	Dysderidae	Dysdera	crocata		Dysdera crocata	C.L. Koch, 1838	Dysdera crocata C.L. Koch, 1838	species	INTR	Borges, P. A.V.	2017
DTP Collection_203	Palearctic	Portugal	Azores	Terceira	Praia da Vitória	Paul da Pedreira	Paul da Pedreira; PPCP-T202	38°42’13.09’’N; 27°02’46.37’’W	38.7043	-27.0465	WGS84	3	10	2017-06-30	Day/Night	Pitfall	sample 25	na	Pimentel, C.				1	1	Animalia	Arthropoda	Arachnida	Araneae	Dysderidae	Dysdera	crocata		Dysdera crocata	C.L. Koch, 1838	Dysdera crocata C.L. Koch, 1838	species	INTR	Borges, P. A.V.	2017
DTP Collection_288	Palearctic	Portugal	Azores	Terceira	Praia da Vitória	Paul da Pedreira	Paul da Pedreira; PPCP-T202	38°42’13.09’’N; 27°02’46.37’’W	38.7043	-27.0465	WGS84	3	10	2017-06-30	Day/Night	Pitfall	sample 22	na	Pimentel, C.			1		1	Animalia	Arthropoda	Arachnida	Araneae	Dysderidae	Dysdera	crocata		Dysdera crocata	C.L. Koch, 1838	Dysdera crocata C.L. Koch, 1838	species	INTR	Borges, P. A.V.	2017
DTP Collection_321	Palearctic	Portugal	Azores	Terceira	Praia da Vitória	Paul da Pedreira	Paul da Pedreira; PPCP-T202	38°42’13.09’’N; 27°02’46.37’’W	38.7043	-27.0465	WGS84	3	10	2017-06-30	Day/Night	Pitfall	sample 21	na	Pimentel, C.				1	1	Animalia	Arthropoda	Arachnida	Araneae	Dysderidae	Dysdera	crocata		Dysdera crocata	C.L. Koch, 1838	Dysdera crocata C.L. Koch, 1838	species	INTR	Borges, P. A.V.	2017
DTP Collection_348	Palearctic	Portugal	Azores	Terceira	Praia da Vitória	Paul do Belo Jardim	Paul do Belo Jardim - Margins; PBJ-T203	38°42’47.95’’N, 27°03’40.93’’W	38.7134	-27.0616	WGS84	5	10	2017-08-16	Day/Night	Pitfall	sample 20	na	Pimentel, C.				1	1	Animalia	Arthropoda	Arachnida	Araneae	Dysderidae	Dysdera	crocata		Dysdera crocata	C.L. Koch, 1838	Dysdera crocata C.L. Koch, 1838	species	INTR	Borges, P. A.V.	2017
DTP Collection_380	Palearctic	Portugal	Azores	Terceira	Praia da Vitória	Paul da Pedreira	Paul da Pedreira; PPCP-T202	38°42’13.09’’N; 27°02’46.37’’W	38.7043	-27.0465	WGS84	3	10	2016-09-15	Day/Night	Pitfall	sample 19	na	Pimentel, C.			2		2	Animalia	Arthropoda	Arachnida	Araneae	Dysderidae	Dysdera	crocata		Dysdera crocata	C.L. Koch, 1838	Dysdera crocata C.L. Koch, 1838	species	INTR	Borges, P. A.V.	2016
DTP Collection_381	Palearctic	Portugal	Azores	Terceira	Praia da Vitória	Paul do Belo Jardim	Paul do Belo Jardim - Margins; PBJ-T203	38°42’47.95’’N, 27°03’40.93’’W	38.7134	-27.0616	WGS84	5	10	2016-09-15	Day/Night	Pitfall	sample 19	na	Pimentel, C.				4	4	Animalia	Arthropoda	Arachnida	Araneae	Dysderidae	Dysdera	crocata		Dysdera crocata	C.L. Koch, 1838	Dysdera crocata C.L. Koch, 1838	species	INTR	Borges, P. A.V.	2016
DTP Collection_413	Palearctic	Portugal	Azores	Terceira	Praia da Vitória	Paul da Pedreira	Paul da Pedreira; PPCP-T202	38°42’13.09’’N; 27°02’46.37’’W	38.7043	-27.0465	WGS84	3	10	2016-09-15	Day/Night	Pitfall	sample 18	na	Pimentel, C.		1			1	Animalia	Arthropoda	Arachnida	Araneae	Dysderidae	Dysdera	crocata		Dysdera crocata	C.L. Koch, 1838	Dysdera crocata C.L. Koch, 1838	species	INTR	Borges, P. A.V.	2016
DTP Collection_440	Palearctic	Portugal	Azores	Terceira	Praia da Vitória	Paul do Belo Jardim	Paul do Belo Jardim - Margins; PBJ-T203	38°42’47.95’’N, 27°03’40.93’’W	38.7134	-27.0616	WGS84	5	10	2016-09-15	Day/Night	Pitfall	sample 17	na	Pimentel, C.			1		1	Animalia	Arthropoda	Arachnida	Araneae	Dysderidae	Dysdera	crocata		Dysdera crocata	C.L. Koch, 1838	Dysdera crocata C.L. Koch, 1838	species	INTR	Borges, P. A.V.	2016
DTP Collection_441	Palearctic	Portugal	Azores	Terceira	Praia da Vitória	Paul da Praia Vitória	Paul da Praia Vitória- Margins; PPV-T200	38°44’06.44’’N, 27°03’36.21’’W	38.735	-27.06	WGS84	6	10	2017-08-23	Day/Night	Pitfall	sample 17	na	Pimentel, C.		1			1	Animalia	Arthropoda	Arachnida	Araneae	Dysderidae	Dysdera	crocata		Dysdera crocata	C.L. Koch, 1838	Dysdera crocata C.L. Koch, 1838	species	INTR	Borges, P. A.V.	2017
DTP Collection_442	Palearctic	Portugal	Azores	Terceira	Praia da Vitória	Paul do Belo Jardim	Paul do Belo Jardim - Margins; PBJ-T203	38°42’47.95’’N, 27°03’40.93’’W	38.7134	-27.0616	WGS84	5	10	2017-08-16	Day/Night	Pitfall	sample 17	na	Pimentel, C.		1	1		2	Animalia	Arthropoda	Arachnida	Araneae	Dysderidae	Dysdera	crocata		Dysdera crocata	C.L. Koch, 1838	Dysdera crocata C.L. Koch, 1838	species	INTR	Borges, P. A.V.	2017
DTP Collection_474	Palearctic	Portugal	Azores	Terceira	Praia da Vitória	Paul do Belo Jardim	Paul do Belo Jardim - Margins; PBJ-T203	38°42’47.95’’N, 27°03’40.93’’W	38.7134	-27.0616	WGS84	5	10	2016-09-15	Day/Night	Pitfall	sample 16	na	Pimentel, C.			3		3	Animalia	Arthropoda	Arachnida	Araneae	Dysderidae	Dysdera	crocata		Dysdera crocata	C.L. Koch, 1838	Dysdera crocata C.L. Koch, 1838	species	INTR	Borges, P. A.V.	2016
DTP Collection_475	Palearctic	Portugal	Azores	Terceira	Praia da Vitória	Paul da Pedreira	Paul da Pedreira; PPCP-T202	38°42’13.09’’N; 27°02’46.37’’W	38.7043	-27.0465	WGS84	3	10	2017-06-30	Day/Night	Pitfall	sample 16	na	Pimentel, C.			1	1	2	Animalia	Arthropoda	Arachnida	Araneae	Dysderidae	Dysdera	crocata		Dysdera crocata	C.L. Koch, 1838	Dysdera crocata C.L. Koch, 1838	species	INTR	Borges, P. A.V.	2017
DTP Collection_505	Palearctic	Portugal	Azores	Terceira	Praia da Vitória	Paul do Belo Jardim	Paul do Belo Jardim - Margins; PBJ-T203	38°42’47.95’’N, 27°03’40.93’’W	38.7134	-27.0616	WGS84	5	10	2016-09-15	Day/Night	Pitfall	sample 15	na	Pimentel, C.				10	10	Animalia	Arthropoda	Arachnida	Araneae	Dysderidae	Dysdera	crocata		Dysdera crocata	C.L. Koch, 1838	Dysdera crocata C.L. Koch, 1838	species	INTR	Borges, P. A.V.	2016
DTP Collection_550	Palearctic	Portugal	Azores	Terceira	Praia da Vitória	Paul da Praia Vitória	Paul da Praia Vitória - Island; PPV-T201	38°44’06.44’’N, 27°03’36.21’’W	38.735	-27.06	WGS84	6	10	2017-08-23	Day/Night	Pitfall	sample 14	na	Pimentel, C.			2		2	Animalia	Arthropoda	Arachnida	Araneae	Dysderidae	Dysdera	crocata		Dysdera crocata	C.L. Koch, 1838	Dysdera crocata C.L. Koch, 1838	species	INTR	Borges, P. A.V.	2017
DTP Collection_631	Palearctic	Portugal	Azores	Terceira	Praia da Vitória	Paul da Pedreira	Paul da Pedreira; PPCP-T202	38°42’13.09’’N; 27°02’46.37’’W	38.7043	-27.0465	WGS84	3	10	2016-09-15	Day/Night	Pitfall	sample 12	na	Pimentel, C.			1	1	2	Animalia	Arthropoda	Arachnida	Araneae	Dysderidae	Dysdera	crocata		Dysdera crocata	C.L. Koch, 1838	Dysdera crocata C.L. Koch, 1838	species	INTR	Borges, P. A.V.	2016
DTP Collection_632	Palearctic	Portugal	Azores	Terceira	Praia da Vitória	Paul do Belo Jardim	Paul do Belo Jardim - Margins; PBJ-T203	38°42’47.95’’N, 27°03’40.93’’W	38.7134	-27.0616	WGS84	5	10	2016-09-15	Day/Night	Pitfall	sample 12	na	Pimentel, C.				1	1	Animalia	Arthropoda	Arachnida	Araneae	Dysderidae	Dysdera	crocata		Dysdera crocata	C.L. Koch, 1838	Dysdera crocata C.L. Koch, 1838	species	INTR	Borges, P. A.V.	2016
DTP Collection_633	Palearctic	Portugal	Azores	Terceira	Praia da Vitória	Paul do Belo Jardim	Paul do Belo Jardim - Margins; PBJ-T203	38°42’47.95’’N, 27°03’40.93’’W	38.7134	-27.0616	WGS84	5	10	2017-08-16	Day/Night	Pitfall	sample 12	na	Pimentel, C.				1	1	Animalia	Arthropoda	Arachnida	Araneae	Dysderidae	Dysdera	crocata		Dysdera crocata	C.L. Koch, 1838	Dysdera crocata C.L. Koch, 1838	species	INTR	Borges, P. A.V.	2017
DTP Collection_693	Palearctic	Portugal	Azores	Terceira	Praia da Vitória	Paul da Praia Vitória	Paul da Praia Vitória - Island; PPV-T201	38°44’06.44’’N, 27°03’36.21’’W	38.735	-27.06	WGS84	6	10	2017-08-23	Day/Night	Pitfall	sample 11	na	Pimentel, C.		1			1	Animalia	Arthropoda	Arachnida	Araneae	Dysderidae	Dysdera	crocata		Dysdera crocata	C.L. Koch, 1838	Dysdera crocata C.L. Koch, 1838	species	INTR	Borges, P. A.V.	2017
DTP Collection_767	Palearctic	Portugal	Azores	Terceira	Praia da Vitória	Paul do Belo Jardim	Paul do Belo Jardim - Margins; PBJ-T203	38°42’47.95’’N, 27°03’40.93’’W	38.7134	-27.0616	WGS84	5	10	2017-08-16	Day/Night	Pitfall	sample 10	na	Pimentel, C.				4	4	Animalia	Arthropoda	Arachnida	Araneae	Dysderidae	Dysdera	crocata		Dysdera crocata	C.L. Koch, 1838	Dysdera crocata C.L. Koch, 1838	species	INTR	Borges, P. A.V.	2017
DTP Collection_944	Palearctic	Portugal	Azores	Terceira	Praia da Vitória	Paul do Belo Jardim	Paul do Belo Jardim - Margins; PBJ-T203	38°42’47.95’’N, 27°03’40.93’’W	38.7134	-27.0616	WGS84	5	10	2017-08-16	Day/Night	Pitfall	sample 09	na	Pimentel, C.				3	3	Animalia	Arthropoda	Arachnida	Araneae	Dysderidae	Dysdera	crocata		Dysdera crocata	C.L. Koch, 1838	Dysdera crocata C.L. Koch, 1838	species	INTR	Borges, P. A.V.	2017
DTP Collection_1122	Palearctic	Portugal	Azores	Terceira	Praia da Vitória	Paul do Belo Jardim	Paul do Belo Jardim - Margins; PBJ-T203	38°42’47.95’’N, 27°03’40.93’’W	38.7134	-27.0616	WGS84	5	10	2016-09-15	Day/Night	Pitfall	sample 08	na	Pimentel, C.				3	3	Animalia	Arthropoda	Arachnida	Araneae	Dysderidae	Dysdera	crocata		Dysdera crocata	C.L. Koch, 1838	Dysdera crocata C.L. Koch, 1838	species	INTR	Borges, P. A.V.	2016
DTP Collection_1123	Palearctic	Portugal	Azores	Terceira	Praia da Vitória	Paul da Praia Vitória	Paul da Praia Vitória - Island; PPV-T201	38°44’06.44’’N, 27°03’36.21’’W	38.735	-27.06	WGS84	6	10	2017-08-23	Day/Night	Pitfall	sample 08	na	Pimentel, C.				1	1	Animalia	Arthropoda	Arachnida	Araneae	Dysderidae	Dysdera	crocata		Dysdera crocata	C.L. Koch, 1838	Dysdera crocata C.L. Koch, 1838	species	INTR	Borges, P. A.V.	2017
DTP Collection_1124	Palearctic	Portugal	Azores	Terceira	Praia da Vitória	Paul do Belo Jardim	Paul do Belo Jardim - Margins; PBJ-T203	38°42’47.95’’N, 27°03’40.93’’W	38.7134	-27.0616	WGS84	5	10	2017-08-16	Day/Night	Pitfall	sample 08	na	Pimentel, C.		1	1		2	Animalia	Arthropoda	Arachnida	Araneae	Dysderidae	Dysdera	crocata		Dysdera crocata	C.L. Koch, 1838	Dysdera crocata C.L. Koch, 1838	species	INTR	Borges, P. A.V.	2017
DTP Collection_1270	Palearctic	Portugal	Azores	Terceira	Praia da Vitória	Paul da Praia Vitória	Paul da Praia Vitória - Island; PPV-T201	38°44’06.44’’N, 27°03’36.21’’W	38.735	-27.06	WGS84	6	10	2017-08-23	Day/Night	Pitfall	sample 07	na	Pimentel, C.			1		1	Animalia	Arthropoda	Arachnida	Araneae	Dysderidae	Dysdera	crocata		Dysdera crocata	C.L. Koch, 1838	Dysdera crocata C.L. Koch, 1838	species	INTR	Borges, P. A.V.	2017
DTP Collection_1271	Palearctic	Portugal	Azores	Terceira	Praia da Vitória	Paul do Belo Jardim	Paul do Belo Jardim - Margins; PBJ-T203	38°42’47.95’’N, 27°03’40.93’’W	38.7134	-27.0616	WGS84	5	10	2017-08-16	Day/Night	Pitfall	sample 07	na	Pimentel, C.			1	1	2	Animalia	Arthropoda	Arachnida	Araneae	Dysderidae	Dysdera	crocata		Dysdera crocata	C.L. Koch, 1838	Dysdera crocata C.L. Koch, 1838	species	INTR	Borges, P. A.V.	2017
DTP Collection_1428	Palearctic	Portugal	Azores	Terceira	Praia da Vitória	Paul do Belo Jardim	Paul do Belo Jardim - Margins; PBJ-T203	38°42’47.95’’N, 27°03’40.93’’W	38.7134	-27.0616	WGS84	5	10	2016-09-15	Day/Night	Pitfall	sample 06	na	Pimentel, C.				1	1	Animalia	Arthropoda	Arachnida	Araneae	Dysderidae	Dysdera	crocata		Dysdera crocata	C.L. Koch, 1838	Dysdera crocata C.L. Koch, 1838	species	INTR	Borges, P. A.V.	2016
DTP Collection_1603	Palearctic	Portugal	Azores	Terceira	Praia da Vitória	Paul do Belo Jardim	Paul do Belo Jardim - Margins; PBJ-T203	38°42’47.95’’N, 27°03’40.93’’W	38.7134	-27.0616	WGS84	5	10	2016-09-15	Day/Night	Pitfall	sample 05	na	Pimentel, C.				3	3	Animalia	Arthropoda	Arachnida	Araneae	Dysderidae	Dysdera	crocata		Dysdera crocata	C.L. Koch, 1838	Dysdera crocata C.L. Koch, 1838	species	INTR	Borges, P. A.V.	2016
DTP Collection_1604	Palearctic	Portugal	Azores	Terceira	Praia da Vitória	Paul da Pedreira	Paul da Pedreira; PPCP-T202	38°42’13.09’’N; 27°02’46.37’’W	38.7043	-27.0465	WGS84	3	10	2017-06-30	Day/Night	Pitfall	sample 05	na	Pimentel, C.				1	1	Animalia	Arthropoda	Arachnida	Araneae	Dysderidae	Dysdera	crocata		Dysdera crocata	C.L. Koch, 1838	Dysdera crocata C.L. Koch, 1838	species	INTR	Borges, P. A.V.	2017
DTP Collection_1806	Palearctic	Portugal	Azores	Terceira	Praia da Vitória	Paul do Belo Jardim	Paul do Belo Jardim - Margins; PBJ-T203	38°42’47.95’’N, 27°03’40.93’’W	38.7134	-27.0616	WGS84	5	10	2016-09-15	Day/Night	Pitfall	sample 04	na	Pimentel, C.				1	1	Animalia	Arthropoda	Arachnida	Araneae	Dysderidae	Dysdera	crocata		Dysdera crocata	C.L. Koch, 1838	Dysdera crocata C.L. Koch, 1838	species	INTR	Borges, P. A.V.	2016
DTP Collection_2141	Palearctic	Portugal	Azores	Terceira	Praia da Vitória	Paul da Praia Vitória	Paul da Praia Vitória - Island; PPV-T201	38°44’06.44’’N, 27°03’36.21’’W	38.735	-27.06	WGS84	6	10	2016-09-15	Day/Night	Pitfall	sample 03	na	Pimentel, C.				1	1	Animalia	Arthropoda	Arachnida	Araneae	Dysderidae	Dysdera	crocata		Dysdera crocata	C.L. Koch, 1838	Dysdera crocata C.L. Koch, 1838	species	INTR	Borges, P. A.V.	2016
DTP Collection_2142	Palearctic	Portugal	Azores	Terceira	Praia da Vitória	Paul da Praia Vitória	Paul da Praia Vitória- Margins; PPV-T200	38°44’06.44’’N, 27°03’36.21’’W	38.735	-27.06	WGS84	6	10	2017-08-31	Night	Active aerial searching	sample 03	na	Borges, P.A.V.		1			1	Animalia	Arthropoda	Arachnida	Araneae	Dysderidae	Dysdera	crocata		Dysdera crocata	C.L. Koch, 1838	Dysdera crocata C.L. Koch, 1838	species	INTR	Borges, P. A.V.	2017
DTP Collection_2143	Palearctic	Portugal	Azores	Terceira	Praia da Vitória	Paul do Belo Jardim	Paul do Belo Jardim - Margins; PBJ-T203	38°42’47.95’’N, 27°03’40.93’’W	38.7134	-27.0616	WGS84	5	10	2017-08-16	Day/Night	Pitfall	sample 03	na	Pimentel, C.			1		1	Animalia	Arthropoda	Arachnida	Araneae	Dysderidae	Dysdera	crocata		Dysdera crocata	C.L. Koch, 1838	Dysdera crocata C.L. Koch, 1838	species	INTR	Borges, P. A.V.	2017
DTP Collection_2481	Palearctic	Portugal	Azores	Terceira	Praia da Vitória	Paul do Belo Jardim	Paul do Belo Jardim - Margins; PBJ-T203	38°42’47.95’’N, 27°03’40.93’’W	38.7134	-27.0616	WGS84	5	10	2016-09-15	Day/Night	Pitfall	sample 02	na	Pimentel, C.				1	1	Animalia	Arthropoda	Arachnida	Araneae	Dysderidae	Dysdera	crocata		Dysdera crocata	C.L. Koch, 1838	Dysdera crocata C.L. Koch, 1838	species	INTR	Borges, P. A.V.	2016
DTP Collection_2482	Palearctic	Portugal	Azores	Terceira	Praia da Vitória	Paul da Praia Vitória	Paul da Praia Vitória - Island; PPV-T201	38°44’06.44’’N, 27°03’36.21’’W	38.735	-27.06	WGS84	6	10	2016-09-15	Day/Night	Pitfall	sample 02	na	Pimentel, C.				1	1	Animalia	Arthropoda	Arachnida	Araneae	Dysderidae	Dysdera	crocata		Dysdera crocata	C.L. Koch, 1838	Dysdera crocata C.L. Koch, 1838	species	INTR	Borges, P. A.V.	2016
DTP Collection_2483	Palearctic	Portugal	Azores	Terceira	Praia da Vitória	Paul do Belo Jardim	Paul do Belo Jardim - Margins; PBJ-T203	38°42’47.95’’N, 27°03’40.93’’W	38.7134	-27.0616	WGS84	5	10	2016-09-15	Night	Active aerial searching	sample 02	na	Pimentel, C.		1			1	Animalia	Arthropoda	Arachnida	Araneae	Dysderidae	Dysdera	crocata		Dysdera crocata	C.L. Koch, 1838	Dysdera crocata C.L. Koch, 1838	species	INTR	Borges, P. A.V.	2016
DTP Collection_822	Palearctic	Portugal	Azores	Terceira	Praia da Vitória	Paul da Pedreira	Paul da Pedreira; PPCP-T202	38°42’13.09’’N; 27°02’46.37’’W	38.7043	-27.0465	WGS84	3	10	2016-08-30	Day	Beating	sample 10	Arundo donax	Pimentel, C.				1	1	Animalia	Arthropoda	Insecta	Psocoptera	Ectopsocidae	Ectopsocus	briggsi		Ectopsocus briggsi	McLachlan, 1899	Ectopsocus briggsi McLachlan, 1899	species	INTR	Borges, P. A.V.	2016
DTP Collection_823	Palearctic	Portugal	Azores	Terceira	Praia da Vitória	Paul do Belo Jardim	Paul do Belo Jardim - Margins; PBJ-T203	38°42’47.95’’N, 27°03’40.93’’W	38.7134	-27.0616	WGS84	5	10	2017-08-03	Day	Beating	sample 10	Arundo donax	Pimentel, C.	5				5	Animalia	Arthropoda	Insecta	Psocoptera	Ectopsocidae	Ectopsocus	briggsi		Ectopsocus briggsi	McLachlan, 1899	Ectopsocus briggsi McLachlan, 1899	species	INTR	Borges, P. A.V.	2017
DTP Collection_824	Palearctic	Portugal	Azores	Terceira	Praia da Vitória	Paul da Pedreira	Paul da Pedreira; PPCP-T202	38°42’13.09’’N; 27°02’46.37’’W	38.7043	-27.0465	WGS84	3	10	2017-06-28	Day	Beating	sample 10	Arundo donax	Pimentel, C.	1			2	3	Animalia	Arthropoda	Insecta	Psocoptera	Ectopsocidae	Ectopsocus	briggsi		Ectopsocus briggsi	McLachlan, 1899	Ectopsocus briggsi McLachlan, 1899	species	INTR	Borges, P. A.V.	2017
DTP Collection_1008	Palearctic	Portugal	Azores	Terceira	Praia da Vitória	Paul do Belo Jardim	Paul do Belo Jardim - Margins; PBJ-T203	38°42’47.95’’N, 27°03’40.93’’W	38.7134	-27.0616	WGS84	5	10	2016-08-08	Day	Beating	sample 09	Arundo donax	Pimentel, C.	1				1	Animalia	Arthropoda	Insecta	Psocoptera	Ectopsocidae	Ectopsocus	briggsi		Ectopsocus briggsi	McLachlan, 1899	Ectopsocus briggsi McLachlan, 1899	species	INTR	Borges, P. A.V.	2016
DTP Collection_1009	Palearctic	Portugal	Azores	Terceira	Praia da Vitória	Paul do Belo Jardim	Paul do Belo Jardim - Margins; PBJ-T203	38°42’47.95’’N, 27°03’40.93’’W	38.7134	-27.0616	WGS84	5	10	2017-08-03	Day	Beating	sample 09	Arundo donax	Pimentel, C.	8				8	Animalia	Arthropoda	Insecta	Psocoptera	Ectopsocidae	Ectopsocus	briggsi		Ectopsocus briggsi	McLachlan, 1899	Ectopsocus briggsi McLachlan, 1899	species	INTR	Borges, P. A.V.	2017
DTP Collection_1010	Palearctic	Portugal	Azores	Terceira	Praia da Vitória	Paul da Pedreira	Paul da Pedreira; PPCP-T202	38°42’13.09’’N; 27°02’46.37’’W	38.7043	-27.0465	WGS84	3	10	2017-06-28	Day	Beating	sample 09	Arundo donax	Pimentel, C.	3				3	Animalia	Arthropoda	Insecta	Psocoptera	Ectopsocidae	Ectopsocus	briggsi		Ectopsocus briggsi	McLachlan, 1899	Ectopsocus briggsi McLachlan, 1899	species	INTR	Borges, P. A.V.	2017
DTP Collection_1011	Palearctic	Portugal	Azores	Terceira	Praia da Vitória	Paul da Pedreira	Paul da Pedreira; PPCP-T202	38°42’13.09’’N; 27°02’46.37’’W	38.7043	-27.0465	WGS84	3	10	2017-06-28	Day	Beating	sample 09	Morella faya	Pimentel, C.	1				1	Animalia	Arthropoda	Insecta	Psocoptera	Ectopsocidae	Ectopsocus	briggsi		Ectopsocus briggsi	McLachlan, 1899	Ectopsocus briggsi McLachlan, 1899	species	INTR	Borges, P. A.V.	2017
DTP Collection_1177	Palearctic	Portugal	Azores	Terceira	Praia da Vitória	Paul do Belo Jardim	Paul do Belo Jardim - Margins; PBJ-T203	38°42’47.95’’N, 27°03’40.93’’W	38.7134	-27.0616	WGS84	5	10	2016-08-08	Day	Beating	sample 08	Arundo donax	Pimentel, C.	1				1	Animalia	Arthropoda	Insecta	Psocoptera	Ectopsocidae	Ectopsocus	briggsi		Ectopsocus briggsi	McLachlan, 1899	Ectopsocus briggsi McLachlan, 1899	species	INTR	Borges, P. A.V.	2016
DTP Collection_1178	Palearctic	Portugal	Azores	Terceira	Praia da Vitória	Paul da Pedreira	Paul da Pedreira; PPCP-T202	38°42’13.09’’N; 27°02’46.37’’W	38.7043	-27.0465	WGS84	3	10	2017-06-28	Day	Beating	sample 08	Morella faya	Pimentel, C.	1				1	Animalia	Arthropoda	Insecta	Psocoptera	Ectopsocidae	Ectopsocus	briggsi		Ectopsocus briggsi	McLachlan, 1899	Ectopsocus briggsi McLachlan, 1899	species	INTR	Borges, P. A.V.	2017
DTP Collection_1179	Palearctic	Portugal	Azores	Terceira	Praia da Vitória	Paul da Praia Vitória	Paul da Praia Vitória- Margins; PPV-T200	38°44’06.44’’N, 27°03’36.21’’W	38.735	-27.06	WGS84	6	10	2017-08-09	Day	Beating	sample 08	Arundo donax	Pimentel, C.	1			1	2	Animalia	Arthropoda	Insecta	Psocoptera	Ectopsocidae	Ectopsocus	briggsi		Ectopsocus briggsi	McLachlan, 1899	Ectopsocus briggsi McLachlan, 1899	species	INTR	Borges, P. A.V.	2017
DTP Collection_1180	Palearctic	Portugal	Azores	Terceira	Praia da Vitória	Paul do Belo Jardim	Paul do Belo Jardim - Margins; PBJ-T203	38°42’47.95’’N, 27°03’40.93’’W	38.7134	-27.0616	WGS84	5	10	2017-08-03	Day	Beating	sample 08	Arundo donax	Pimentel, C.	3				3	Animalia	Arthropoda	Insecta	Psocoptera	Ectopsocidae	Ectopsocus	briggsi		Ectopsocus briggsi	McLachlan, 1899	Ectopsocus briggsi McLachlan, 1899	species	INTR	Borges, P. A.V.	2017
DTP Collection_1327	Palearctic	Portugal	Azores	Terceira	Praia da Vitória	Paul da Pedreira	Paul da Pedreira; PPCP-T202	38°42’13.09’’N; 27°02’46.37’’W	38.7043	-27.0465	WGS84	3	10	2016-08-30	Day	Beating	sample 07	Morella faya	Pimentel, C.	1				1	Animalia	Arthropoda	Insecta	Psocoptera	Ectopsocidae	Ectopsocus	briggsi		Ectopsocus briggsi	McLachlan, 1899	Ectopsocus briggsi McLachlan, 1899	species	INTR	Borges, P. A.V.	2016
DTP Collection_1328	Palearctic	Portugal	Azores	Terceira	Praia da Vitória	Paul da Pedreira	Paul da Pedreira; PPCP-T202	38°42’13.09’’N; 27°02’46.37’’W	38.7043	-27.0465	WGS84	3	10	2017-06-28	Day	Beating	sample 07	Morella faya	Pimentel, C.	2				2	Animalia	Arthropoda	Insecta	Psocoptera	Ectopsocidae	Ectopsocus	briggsi		Ectopsocus briggsi	McLachlan, 1899	Ectopsocus briggsi McLachlan, 1899	species	INTR	Borges, P. A.V.	2017
DTP Collection_1329	Palearctic	Portugal	Azores	Terceira	Praia da Vitória	Paul do Belo Jardim	Paul do Belo Jardim - Margins; PBJ-T203	38°42’47.95’’N, 27°03’40.93’’W	38.7134	-27.0616	WGS84	5	10	2017-08-03	Day	Beating	sample 07	Arundo donax	Pimentel, C.	1			1	2	Animalia	Arthropoda	Insecta	Psocoptera	Ectopsocidae	Ectopsocus	briggsi		Ectopsocus briggsi	McLachlan, 1899	Ectopsocus briggsi McLachlan, 1899	species	INTR	Borges, P. A.V.	2017
DTP Collection_1483	Palearctic	Portugal	Azores	Terceira	Praia da Vitória	Paul da Pedreira	Paul da Pedreira; PPCP-T202	38°42’13.09’’N; 27°02’46.37’’W	38.7043	-27.0465	WGS84	3	10	2016-09-15	Day	Sweeping	sample 06	na	Goulart, S. & Pimentel, C.				1	1	Animalia	Arthropoda	Insecta	Psocoptera	Ectopsocidae	Ectopsocus	briggsi		Ectopsocus briggsi	McLachlan, 1899	Ectopsocus briggsi McLachlan, 1899	species	INTR	Borges, P. A.V.	2016
DTP Collection_1484	Palearctic	Portugal	Azores	Terceira	Praia da Vitória	Paul da Pedreira	Paul da Pedreira; PPCP-T202	38°42’13.09’’N; 27°02’46.37’’W	38.7043	-27.0465	WGS84	3	10	2017-06-28	Day	Beating	sample 06	Morella faya	Pimentel, C.	2			2	4	Animalia	Arthropoda	Insecta	Psocoptera	Ectopsocidae	Ectopsocus	briggsi		Ectopsocus briggsi	McLachlan, 1899	Ectopsocus briggsi McLachlan, 1899	species	INTR	Borges, P. A.V.	2017
DTP Collection_1485	Palearctic	Portugal	Azores	Terceira	Praia da Vitória	Paul da Praia Vitória	Paul da Praia Vitória- Margins; PPV-T200	38°44’06.44’’N, 27°03’36.21’’W	38.735	-27.06	WGS84	6	10	2017-08-09	Day	Beating	sample 06	Arundo donax	Pimentel, C.	1				1	Animalia	Arthropoda	Insecta	Psocoptera	Ectopsocidae	Ectopsocus	briggsi		Ectopsocus briggsi	McLachlan, 1899	Ectopsocus briggsi McLachlan, 1899	species	INTR	Borges, P. A.V.	2017
DTP Collection_1486	Palearctic	Portugal	Azores	Terceira	Praia da Vitória	Paul do Belo Jardim	Paul do Belo Jardim - Margins; PBJ-T203	38°42’47.95’’N, 27°03’40.93’’W	38.7134	-27.0616	WGS84	5	10	2017-08-03	Day	Beating	sample 06	Arundo donax	Pimentel, C.	14				14	Animalia	Arthropoda	Insecta	Psocoptera	Ectopsocidae	Ectopsocus	briggsi		Ectopsocus briggsi	McLachlan, 1899	Ectopsocus briggsi McLachlan, 1899	species	INTR	Borges, P. A.V.	2017
DTP Collection_1660	Palearctic	Portugal	Azores	Terceira	Praia da Vitória	Paul da Praia Vitória	Paul da Praia Vitória- Margins; PPV-T200	38°44’06.44’’N, 27°03’36.21’’W	38.735	-27.06	WGS84	6	10	2016-08-30	Day	Beating	sample 05	Morella faya	Pimentel, C.	7				7	Animalia	Arthropoda	Insecta	Psocoptera	Ectopsocidae	Ectopsocus	briggsi		Ectopsocus briggsi	McLachlan, 1899	Ectopsocus briggsi McLachlan, 1899	species	INTR	Borges, P. A.V.	2016
DTP Collection_1661	Palearctic	Portugal	Azores	Terceira	Praia da Vitória	Paul da Pedreira	Paul da Pedreira; PPCP-T202	38°42’13.09’’N; 27°02’46.37’’W	38.7043	-27.0465	WGS84	3	10	2016-08-30	Day	Beating	sample 05	Arundo donax	Pimentel, C.	1				1	Animalia	Arthropoda	Insecta	Psocoptera	Ectopsocidae	Ectopsocus	briggsi		Ectopsocus briggsi	McLachlan, 1899	Ectopsocus briggsi McLachlan, 1899	species	INTR	Borges, P. A.V.	2016
DTP Collection_1662	Palearctic	Portugal	Azores	Terceira	Praia da Vitória	Paul do Belo Jardim	Paul do Belo Jardim - Margins; PBJ-T203	38°42’47.95’’N, 27°03’40.93’’W	38.7134	-27.0616	WGS84	5	10	2017-08-03	Day	Beating	sample 05	Arundo donax	Pimentel, C.	32				32	Animalia	Arthropoda	Insecta	Psocoptera	Ectopsocidae	Ectopsocus	briggsi		Ectopsocus briggsi	McLachlan, 1899	Ectopsocus briggsi McLachlan, 1899	species	INTR	Borges, P. A.V.	2017
DTP Collection_1922	Palearctic	Portugal	Azores	Terceira	Praia da Vitória	Paul da Pedreira	Paul da Pedreira; PPCP-T202	38°42’13.09’’N; 27°02’46.37’’W	38.7043	-27.0465	WGS84	3	10	2016-08-30	Day	Beating	sample 04	Arundo donax	Pimentel, C.	1				1	Animalia	Arthropoda	Insecta	Psocoptera	Ectopsocidae	Ectopsocus	briggsi		Ectopsocus briggsi	McLachlan, 1899	Ectopsocus briggsi McLachlan, 1899	species	INTR	Borges, P. A.V.	2016
DTP Collection_1923	Palearctic	Portugal	Azores	Terceira	Praia da Vitória	Paul do Belo Jardim	Paul do Belo Jardim - Margins; PBJ-T203	38°42’47.95’’N, 27°03’40.93’’W	38.7134	-27.0616	WGS84	5	10	2017-08-03	Day	Beating	sample 04	Juncus acutus	Pimentel, C.	1				1	Animalia	Arthropoda	Insecta	Psocoptera	Ectopsocidae	Ectopsocus	briggsi		Ectopsocus briggsi	McLachlan, 1899	Ectopsocus briggsi McLachlan, 1899	species	INTR	Borges, P. A.V.	2017
DTP Collection_1924	Palearctic	Portugal	Azores	Terceira	Praia da Vitória	Paul do Belo Jardim	Paul do Belo Jardim - Margins; PBJ-T203	38°42’47.95’’N, 27°03’40.93’’W	38.7134	-27.0616	WGS84	5	10	2017-08-03	Day	Beating	sample 04	Arundo donax	Pimentel, C.	3			2	5	Animalia	Arthropoda	Insecta	Psocoptera	Ectopsocidae	Ectopsocus	briggsi		Ectopsocus briggsi	McLachlan, 1899	Ectopsocus briggsi McLachlan, 1899	species	INTR	Borges, P. A.V.	2017
DTP Collection_2254	Palearctic	Portugal	Azores	Terceira	Praia da Vitória	Paul da Praia Vitória	Paul da Praia Vitória- Margins; PPV-T200	38°44’06.44’’N, 27°03’36.21’’W	38.735	-27.06	WGS84	6	10	2016-08-30	Day	Beating	sample 03	Arundo donax	Pimentel, C.	2				2	Animalia	Arthropoda	Insecta	Psocoptera	Ectopsocidae	Ectopsocus	briggsi		Ectopsocus briggsi	McLachlan, 1899	Ectopsocus briggsi McLachlan, 1899	species	INTR	Borges, P. A.V.	2016
DTP Collection_2255	Palearctic	Portugal	Azores	Terceira	Praia da Vitória	Paul da Pedreira	Paul da Pedreira; PPCP-T202	38°42’13.09’’N; 27°02’46.37’’W	38.7043	-27.0465	WGS84	3	10	2016-08-30	Day	Beating	sample 03	Arundo donax	Pimentel, C.	1				1	Animalia	Arthropoda	Insecta	Psocoptera	Ectopsocidae	Ectopsocus	briggsi		Ectopsocus briggsi	McLachlan, 1899	Ectopsocus briggsi McLachlan, 1899	species	INTR	Borges, P. A.V.	2016
DTP Collection_2256	Palearctic	Portugal	Azores	Terceira	Praia da Vitória	Paul da Pedreira	Paul da Pedreira; PPCP-T202	38°42’13.09’’N; 27°02’46.37’’W	38.7043	-27.0465	WGS84	3	10	2016-08-31	Night	Active aerial searching	sample 03	na	Gabriel, R.	2			1	3	Animalia	Arthropoda	Insecta	Psocoptera	Ectopsocidae	Ectopsocus	briggsi		Ectopsocus briggsi	McLachlan, 1899	Ectopsocus briggsi McLachlan, 1899	species	INTR	Borges, P. A.V.	2016
DTP Collection_2257	Palearctic	Portugal	Azores	Terceira	Praia da Vitória	Paul da Praia Vitória	Paul da Praia Vitória- Margins; PPV-T200	38°44’06.44’’N, 27°03’36.21’’W	38.735	-27.06	WGS84	6	10	2017-08-09	Day	Beating	sample 03	Arundo donax	Pimentel, C.	1				1	Animalia	Arthropoda	Insecta	Psocoptera	Ectopsocidae	Ectopsocus	briggsi		Ectopsocus briggsi	McLachlan, 1899	Ectopsocus briggsi McLachlan, 1899	species	INTR	Borges, P. A.V.	2017
DTP Collection_2258	Palearctic	Portugal	Azores	Terceira	Praia da Vitória	Paul da Pedreira	Paul da Pedreira; PPCP-T202	38°42’13.09’’N; 27°02’46.37’’W	38.7043	-27.0465	WGS84	3	10	2017-06-21	Night	Active aerial searching	sample 03	na	Borges, P.A.V.	1			3	4	Animalia	Arthropoda	Insecta	Psocoptera	Ectopsocidae	Ectopsocus	briggsi		Ectopsocus briggsi	McLachlan, 1899	Ectopsocus briggsi McLachlan, 1899	species	INTR	Borges, P. A.V.	2017
DTP Collection_2632	Palearctic	Portugal	Azores	Terceira	Praia da Vitória	Paul do Belo Jardim	Paul do Belo Jardim - Margins; PBJ-T203	38°42’47.95’’N, 27°03’40.93’’W	38.7134	-27.0616	WGS84	5	10	2016-08-08	Day	Beating	sample 02	Arundo donax	Pimentel, C.	1				1	Animalia	Arthropoda	Insecta	Psocoptera	Ectopsocidae	Ectopsocus	briggsi		Ectopsocus briggsi	McLachlan, 1899	Ectopsocus briggsi McLachlan, 1899	species	INTR	Borges, P. A.V.	2016
DTP Collection_2633	Palearctic	Portugal	Azores	Terceira	Praia da Vitória	Paul da Pedreira	Paul da Pedreira; PPCP-T202	38°42’13.09’’N; 27°02’46.37’’W	38.7043	-27.0465	WGS84	3	10	2016-08-30	Day	Beating	sample 02	Morella faya	Pimentel, C.	1				1	Animalia	Arthropoda	Insecta	Psocoptera	Ectopsocidae	Ectopsocus	briggsi		Ectopsocus briggsi	McLachlan, 1899	Ectopsocus briggsi McLachlan, 1899	species	INTR	Borges, P. A.V.	2016
DTP Collection_2634	Palearctic	Portugal	Azores	Terceira	Praia da Vitória	Paul da Pedreira	Paul da Pedreira; PPCP-T202	38°42’13.09’’N; 27°02’46.37’’W	38.7043	-27.0465	WGS84	3	10	2017-06-28	Day	Beating	sample 02	Morella faya	Pimentel, C.	2				2	Animalia	Arthropoda	Insecta	Psocoptera	Ectopsocidae	Ectopsocus	briggsi		Ectopsocus briggsi	McLachlan, 1899	Ectopsocus briggsi McLachlan, 1899	species	INTR	Borges, P. A.V.	2017
DTP Collection_2635	Palearctic	Portugal	Azores	Terceira	Praia da Vitória	Paul do Belo Jardim	Paul do Belo Jardim - Margins; PBJ-T203	38°42’47.95’’N, 27°03’40.93’’W	38.7134	-27.0616	WGS84	5	10	2017-08-03	Day	Beating	sample 02	Arundo donax	Pimentel, C.	1				1	Animalia	Arthropoda	Insecta	Psocoptera	Ectopsocidae	Ectopsocus	briggsi		Ectopsocus briggsi	McLachlan, 1899	Ectopsocus briggsi McLachlan, 1899	species	INTR	Borges, P. A.V.	2017
DTP Collection_2636	Palearctic	Portugal	Azores	Terceira	Praia da Vitória	Paul da Praia Vitória	Paul da Praia Vitória- Margins; PPV-T200	38°44’06.44’’N, 27°03’36.21’’W	38.735	-27.06	WGS84	6	10	2017-08-31	Night	Beating	sample 02	na	Borges, P.A.V.	3				3	Animalia	Arthropoda	Insecta	Psocoptera	Ectopsocidae	Ectopsocus	briggsi		Ectopsocus briggsi	McLachlan, 1899	Ectopsocus briggsi McLachlan, 1899	species	INTR	Borges, P. A.V.	2017
DTP Collection_2637	Palearctic	Portugal	Azores	Terceira	Praia da Vitória	Paul da Pedreira	Paul da Pedreira; PPCP-T202	38°42’13.09’’N; 27°02’46.37’’W	38.7043	-27.0465	WGS84	3	10	2017-06-21	Night	Beating	sample 02	na	Borges, P.A.V.	2				2	Animalia	Arthropoda	Insecta	Psocoptera	Ectopsocidae	Ectopsocus	briggsi		Ectopsocus briggsi	McLachlan, 1899	Ectopsocus briggsi McLachlan, 1899	species	INTR	Borges, P. A.V.	2017
DTP Collection_3033	Palearctic	Portugal	Azores	Terceira	Praia da Vitória	Paul da Pedreira	Paul da Pedreira; PPCP-T202	38°42’13.09’’N; 27°02’46.37’’W	38.7043	-27.0465	WGS84	3	10	2016-08-30	Day	Beating	sample 01	Morella faya	Pimentel, C.	3				3	Animalia	Arthropoda	Insecta	Psocoptera	Ectopsocidae	Ectopsocus	briggsi		Ectopsocus briggsi	McLachlan, 1899	Ectopsocus briggsi McLachlan, 1899	species	INTR	Borges, P. A.V.	2016
DTP Collection_3034	Palearctic	Portugal	Azores	Terceira	Praia da Vitória	Paul da Praia Vitória	Paul da Praia Vitória- Margins; PPV-T200	38°44’06.44’’N, 27°03’36.21’’W	38.735	-27.06	WGS84	6	10	2017-08-09	Day	Beating	sample 01	Arundo donax	Pimentel, C.	2				2	Animalia	Arthropoda	Insecta	Psocoptera	Ectopsocidae	Ectopsocus	briggsi		Ectopsocus briggsi	McLachlan, 1899	Ectopsocus briggsi McLachlan, 1899	species	INTR	Borges, P. A.V.	2017
DTP Collection_3035	Palearctic	Portugal	Azores	Terceira	Praia da Vitória	Paul do Belo Jardim	Paul do Belo Jardim - Margins; PBJ-T203	38°42’47.95’’N, 27°03’40.93’’W	38.7134	-27.0616	WGS84	5	10	2017-08-03	Day	Beating	sample 01	Arundo donax	Pimentel, C.	1				1	Animalia	Arthropoda	Insecta	Psocoptera	Ectopsocidae	Ectopsocus	briggsi		Ectopsocus briggsi	McLachlan, 1899	Ectopsocus briggsi McLachlan, 1899	species	INTR	Borges, P. A.V.	2017
DTP Collection_3036	Palearctic	Portugal	Azores	Terceira	Praia da Vitória	Paul da Praia Vitória	Paul da Praia Vitória- Margins; PPV-T200	38°44’06.44’’N, 27°03’36.21’’W	38.735	-27.06	WGS84	6	10	2017-08-31	Night	Beating	sample 01	na	Pimentel, C.	2				2	Animalia	Arthropoda	Insecta	Psocoptera	Ectopsocidae	Ectopsocus	briggsi		Ectopsocus briggsi	McLachlan, 1899	Ectopsocus briggsi McLachlan, 1899	species	INTR	Borges, P. A.V.	2017
DTP Collection_3037	Palearctic	Portugal	Azores	Terceira	Praia da Vitória	Paul da Pedreira	Paul da Pedreira; PPCP-T202	38°42’13.09’’N; 27°02’46.37’’W	38.7043	-27.0465	WGS84	3	10	2017-06-21	Night	Active aerial searching	sample 01	na	Pimentel, C.	2				2	Animalia	Arthropoda	Insecta	Psocoptera	Ectopsocidae	Ectopsocus	briggsi		Ectopsocus briggsi	McLachlan, 1899	Ectopsocus briggsi McLachlan, 1899	species	INTR	Borges, P. A.V.	2017
DTP Collection_3038	Palearctic	Portugal	Azores	Terceira	Praia da Vitória	Paul da Pedreira	Paul da Pedreira; PPCP-T202	38°42’13.09’’N; 27°02’46.37’’W	38.7043	-27.0465	WGS84	3	10	2017-06-21	Night	Beating	sample 01	na	Pimentel, C.	5				5	Animalia	Arthropoda	Insecta	Psocoptera	Ectopsocidae	Ectopsocus	briggsi		Ectopsocus briggsi	McLachlan, 1899	Ectopsocus briggsi McLachlan, 1899	species	INTR	Borges, P. A.V.	2017
DTP Collection_3039	Palearctic	Portugal	Azores	Terceira	Praia da Vitória	Paul da Pedreira	Paul da Pedreira; PPCP-T202	38°42’13.09’’N; 27°02’46.37’’W	38.7043	-27.0465	WGS84	3	10	2017-06-28	Day	Beating	sample 01	Arundo donax	Pimentel, C.	1				1	Animalia	Arthropoda	Insecta	Psocoptera	Ectopsocidae	Ectopsocus	briggsi		Ectopsocus briggsi	McLachlan, 1899	Ectopsocus briggsi McLachlan, 1899	species	INTR	Borges, P. A.V.	2017
DTP Collection_825	Palearctic	Portugal	Azores	Terceira	Praia da Vitória	Paul da Pedreira	Paul da Pedreira; PPCP-T202	38°42’13.09’’N; 27°02’46.37’’W	38.7043	-27.0465	WGS84	3	10	2016-08-30	Day	Beating	sample 10	Arundo donax	Pimentel, C.	2			1	3	Animalia	Arthropoda	Insecta	Psocoptera	Ectopsocidae	Ectopsocus	strauchi		Ectopsocus strauchi	Enderlein, 1906	Ectopsocus strauchi Enderlein, 1906	species	NAT	Borges, P. A.V.	2016
DTP Collection_826	Palearctic	Portugal	Azores	Terceira	Praia da Vitória	Paul da Pedreira	Paul da Pedreira; PPCP-T202	38°42’13.09’’N; 27°02’46.37’’W	38.7043	-27.0465	WGS84	3	10	2016-08-30	Day	Beating	sample 10	Morella faya	Pimentel, C.				1	1	Animalia	Arthropoda	Insecta	Psocoptera	Ectopsocidae	Ectopsocus	strauchi		Ectopsocus strauchi	Enderlein, 1906	Ectopsocus strauchi Enderlein, 1906	species	NAT	Borges, P. A.V.	2016
DTP Collection_827	Palearctic	Portugal	Azores	Terceira	Praia da Vitória	Paul da Praia Vitória	Paul da Praia Vitória- Margins; PPV-T200	38°44’06.44’’N, 27°03’36.21’’W	38.735	-27.06	WGS84	6	10	2017-08-09	Day	Beating	sample 10	Arundo donax	Pimentel, C.				2	2	Animalia	Arthropoda	Insecta	Psocoptera	Ectopsocidae	Ectopsocus	strauchi		Ectopsocus strauchi	Enderlein, 1906	Ectopsocus strauchi Enderlein, 1906	species	NAT	Borges, P. A.V.	2017
DTP Collection_828	Palearctic	Portugal	Azores	Terceira	Praia da Vitória	Paul do Belo Jardim	Paul do Belo Jardim - Margins; PBJ-T203	38°42’47.95’’N, 27°03’40.93’’W	38.7134	-27.0616	WGS84	5	10	2017-08-03	Day	Beating	sample 10	Arundo donax	Pimentel, C.	1			2	3	Animalia	Arthropoda	Insecta	Psocoptera	Ectopsocidae	Ectopsocus	strauchi		Ectopsocus strauchi	Enderlein, 1906	Ectopsocus strauchi Enderlein, 1906	species	NAT	Borges, P. A.V.	2017
DTP Collection_829	Palearctic	Portugal	Azores	Terceira	Praia da Vitória	Paul da Pedreira	Paul da Pedreira; PPCP-T202	38°42’13.09’’N; 27°02’46.37’’W	38.7043	-27.0465	WGS84	3	10	2017-06-28	Day	Beating	sample 10	Arundo donax	Pimentel, C.	2				2	Animalia	Arthropoda	Insecta	Psocoptera	Ectopsocidae	Ectopsocus	strauchi		Ectopsocus strauchi	Enderlein, 1906	Ectopsocus strauchi Enderlein, 1906	species	NAT	Borges, P. A.V.	2017
DTP Collection_830	Palearctic	Portugal	Azores	Terceira	Praia da Vitória	Paul da Pedreira	Paul da Pedreira; PPCP-T202	38°42’13.09’’N; 27°02’46.37’’W	38.7043	-27.0465	WGS84	3	10	2017-06-28	Day	Beating	sample 10	Morella faya	Pimentel, C.	1			1	2	Animalia	Arthropoda	Insecta	Psocoptera	Ectopsocidae	Ectopsocus	strauchi		Ectopsocus strauchi	Enderlein, 1906	Ectopsocus strauchi Enderlein, 1906	species	NAT	Borges, P. A.V.	2017
DTP Collection_1012	Palearctic	Portugal	Azores	Terceira	Praia da Vitória	Paul do Belo Jardim	Paul do Belo Jardim - Margins; PBJ-T203	38°42’47.95’’N, 27°03’40.93’’W	38.7134	-27.0616	WGS84	5	10	2016-08-08	Day	Beating	sample 09	Juncus acutus	Pimentel, C.	1				1	Animalia	Arthropoda	Insecta	Psocoptera	Ectopsocidae	Ectopsocus	strauchi		Ectopsocus strauchi	Enderlein, 1906	Ectopsocus strauchi Enderlein, 1906	species	NAT	Borges, P. A.V.	2016
DTP Collection_1013	Palearctic	Portugal	Azores	Terceira	Praia da Vitória	Paul do Belo Jardim	Paul do Belo Jardim - Margins; PBJ-T203	38°42’47.95’’N, 27°03’40.93’’W	38.7134	-27.0616	WGS84	5	10	2017-08-03	Day	Beating	sample 09	Arundo donax	Pimentel, C.	3				3	Animalia	Arthropoda	Insecta	Psocoptera	Ectopsocidae	Ectopsocus	strauchi		Ectopsocus strauchi	Enderlein, 1906	Ectopsocus strauchi Enderlein, 1906	species	NAT	Borges, P. A.V.	2017
DTP Collection_1181	Palearctic	Portugal	Azores	Terceira	Praia da Vitória	Paul da Pedreira	Paul da Pedreira; PPCP-T202	38°42’13.09’’N; 27°02’46.37’’W	38.7043	-27.0465	WGS84	3	10	2016-08-30	Day	Beating	sample 08	Arundo donax	Pimentel, C.	2				2	Animalia	Arthropoda	Insecta	Psocoptera	Ectopsocidae	Ectopsocus	strauchi		Ectopsocus strauchi	Enderlein, 1906	Ectopsocus strauchi Enderlein, 1906	species	NAT	Borges, P. A.V.	2016
DTP Collection_1182	Palearctic	Portugal	Azores	Terceira	Praia da Vitória	Paul da Pedreira	Paul da Pedreira; PPCP-T202	38°42’13.09’’N; 27°02’46.37’’W	38.7043	-27.0465	WGS84	3	10	2017-06-28	Day	Beating	sample 08	Morella faya	Pimentel, C.	3				3	Animalia	Arthropoda	Insecta	Psocoptera	Ectopsocidae	Ectopsocus	strauchi		Ectopsocus strauchi	Enderlein, 1906	Ectopsocus strauchi Enderlein, 1906	species	NAT	Borges, P. A.V.	2017
DTP Collection_1183	Palearctic	Portugal	Azores	Terceira	Praia da Vitória	Paul da Praia Vitória	Paul da Praia Vitória- Margins; PPV-T200	38°44’06.44’’N, 27°03’36.21’’W	38.735	-27.06	WGS84	6	10	2017-08-09	Day	Beating	sample 08	Arundo donax	Pimentel, C.	1				1	Animalia	Arthropoda	Insecta	Psocoptera	Ectopsocidae	Ectopsocus	strauchi		Ectopsocus strauchi	Enderlein, 1906	Ectopsocus strauchi Enderlein, 1906	species	NAT	Borges, P. A.V.	2017
DTP Collection_1330	Palearctic	Portugal	Azores	Terceira	Praia da Vitória	Paul da Pedreira	Paul da Pedreira; PPCP-T202	38°42’13.09’’N; 27°02’46.37’’W	38.7043	-27.0465	WGS84	3	10	2016-08-30	Day	Beating	sample 07	Arundo donax	Pimentel, C.	1				1	Animalia	Arthropoda	Insecta	Psocoptera	Ectopsocidae	Ectopsocus	strauchi		Ectopsocus strauchi	Enderlein, 1906	Ectopsocus strauchi Enderlein, 1906	species	NAT	Borges, P. A.V.	2016
DTP Collection_1331	Palearctic	Portugal	Azores	Terceira	Praia da Vitória	Paul do Belo Jardim	Paul do Belo Jardim - Margins; PBJ-T203	38°42’47.95’’N, 27°03’40.93’’W	38.7134	-27.0616	WGS84	5	10	2017-08-03	Day	Beating	sample 07	Juncus acutus	Pimentel, C.	2				2	Animalia	Arthropoda	Insecta	Psocoptera	Ectopsocidae	Ectopsocus	strauchi		Ectopsocus strauchi	Enderlein, 1906	Ectopsocus strauchi Enderlein, 1906	species	NAT	Borges, P. A.V.	2017
DTP Collection_1487	Palearctic	Portugal	Azores	Terceira	Praia da Vitória	Paul da Pedreira	Paul da Pedreira; PPCP-T202	38°42’13.09’’N; 27°02’46.37’’W	38.7043	-27.0465	WGS84	3	10	2016-08-30	Day	Beating	sample 06	Morella faya	Pimentel, C.	1				1	Animalia	Arthropoda	Insecta	Psocoptera	Ectopsocidae	Ectopsocus	strauchi		Ectopsocus strauchi	Enderlein, 1906	Ectopsocus strauchi Enderlein, 1906	species	NAT	Borges, P. A.V.	2016
DTP Collection_1488	Palearctic	Portugal	Azores	Terceira	Praia da Vitória	Paul da Praia Vitória	Paul da Praia Vitória- Margins; PPV-T200	38°44’06.44’’N, 27°03’36.21’’W	38.735	-27.06	WGS84	6	10	2017-08-09	Day	Beating	sample 06	Arundo donax	Pimentel, C.	2				2	Animalia	Arthropoda	Insecta	Psocoptera	Ectopsocidae	Ectopsocus	strauchi		Ectopsocus strauchi	Enderlein, 1906	Ectopsocus strauchi Enderlein, 1906	species	NAT	Borges, P. A.V.	2017
DTP Collection_1489	Palearctic	Portugal	Azores	Terceira	Praia da Vitória	Paul do Belo Jardim	Paul do Belo Jardim - Margins; PBJ-T203	38°42’47.95’’N, 27°03’40.93’’W	38.7134	-27.0616	WGS84	5	10	2017-08-03	Day	Beating	sample 06	Juncus acutus	Pimentel, C.	1			3	4	Animalia	Arthropoda	Insecta	Psocoptera	Ectopsocidae	Ectopsocus	strauchi		Ectopsocus strauchi	Enderlein, 1906	Ectopsocus strauchi Enderlein, 1906	species	NAT	Borges, P. A.V.	2017
DTP Collection_1490	Palearctic	Portugal	Azores	Terceira	Praia da Vitória	Paul do Belo Jardim	Paul do Belo Jardim - Margins; PBJ-T203	38°42’47.95’’N, 27°03’40.93’’W	38.7134	-27.0616	WGS84	5	10	2017-08-03	Day	Beating	sample 06	Arundo donax	Pimentel, C.	3				3	Animalia	Arthropoda	Insecta	Psocoptera	Ectopsocidae	Ectopsocus	strauchi		Ectopsocus strauchi	Enderlein, 1906	Ectopsocus strauchi Enderlein, 1906	species	NAT	Borges, P. A.V.	2017
DTP Collection_1491	Palearctic	Portugal	Azores	Terceira	Praia da Vitória	Paul da Pedreira	Paul da Pedreira; PPCP-T202	38°42’13.09’’N; 27°02’46.37’’W	38.7043	-27.0465	WGS84	3	10	2017-06-28	Day	Beating	sample 06	Arundo donax	Pimentel, C.	1			1	2	Animalia	Arthropoda	Insecta	Psocoptera	Ectopsocidae	Ectopsocus	strauchi		Ectopsocus strauchi	Enderlein, 1906	Ectopsocus strauchi Enderlein, 1906	species	NAT	Borges, P. A.V.	2017
DTP Collection_1663	Palearctic	Portugal	Azores	Terceira	Praia da Vitória	Paul da Praia Vitória	Paul da Praia Vitória- Margins; PPV-T200	38°44’06.44’’N, 27°03’36.21’’W	38.735	-27.06	WGS84	6	10	2016-08-30	Day	Beating	sample 05	Arundo donax	Pimentel, C.	1			1	2	Animalia	Arthropoda	Insecta	Psocoptera	Ectopsocidae	Ectopsocus	strauchi		Ectopsocus strauchi	Enderlein, 1906	Ectopsocus strauchi Enderlein, 1906	species	NAT	Borges, P. A.V.	2016
DTP Collection_1664	Palearctic	Portugal	Azores	Terceira	Praia da Vitória	Paul da Pedreira	Paul da Pedreira; PPCP-T202	38°42’13.09’’N; 27°02’46.37’’W	38.7043	-27.0465	WGS84	3	10	2016-08-30	Day	Beating	sample 05	Arundo donax	Pimentel, C.	2				2	Animalia	Arthropoda	Insecta	Psocoptera	Ectopsocidae	Ectopsocus	strauchi		Ectopsocus strauchi	Enderlein, 1906	Ectopsocus strauchi Enderlein, 1906	species	NAT	Borges, P. A.V.	2016
DTP Collection_1665	Palearctic	Portugal	Azores	Terceira	Praia da Vitória	Paul do Belo Jardim	Paul do Belo Jardim - Margins; PBJ-T203	38°42’47.95’’N, 27°03’40.93’’W	38.7134	-27.0616	WGS84	5	10	2017-08-03	Day	Beating	sample 05	Arundo donax	Pimentel, C.	13				13	Animalia	Arthropoda	Insecta	Psocoptera	Ectopsocidae	Ectopsocus	strauchi		Ectopsocus strauchi	Enderlein, 1906	Ectopsocus strauchi Enderlein, 1906	species	NAT	Borges, P. A.V.	2017
DTP Collection_1925	Palearctic	Portugal	Azores	Terceira	Praia da Vitória	Paul da Pedreira	Paul da Pedreira; PPCP-T202	38°42’13.09’’N; 27°02’46.37’’W	38.7043	-27.0465	WGS84	3	10	2016-08-30	Day	Beating	sample 04	Arundo donax	Pimentel, C.	2			1	3	Animalia	Arthropoda	Insecta	Psocoptera	Ectopsocidae	Ectopsocus	strauchi		Ectopsocus strauchi	Enderlein, 1906	Ectopsocus strauchi Enderlein, 1906	species	NAT	Borges, P. A.V.	2016
DTP Collection_1926	Palearctic	Portugal	Azores	Terceira	Praia da Vitória	Paul da Pedreira	Paul da Pedreira; PPCP-T202	38°42’13.09’’N; 27°02’46.37’’W	38.7043	-27.0465	WGS84	3	10	2016-08-30	Day	Beating	sample 04	Morella faya	Pimentel, C.	1				1	Animalia	Arthropoda	Insecta	Psocoptera	Ectopsocidae	Ectopsocus	strauchi		Ectopsocus strauchi	Enderlein, 1906	Ectopsocus strauchi Enderlein, 1906	species	NAT	Borges, P. A.V.	2016
DTP Collection_1927	Palearctic	Portugal	Azores	Terceira	Praia da Vitória	Paul da Pedreira	Paul da Pedreira; PPCP-T202	38°42’13.09’’N; 27°02’46.37’’W	38.7043	-27.0465	WGS84	3	10	2017-06-28	Day	Beating	sample 04	Morella faya	Pimentel, C.	1			1	2	Animalia	Arthropoda	Insecta	Psocoptera	Ectopsocidae	Ectopsocus	strauchi		Ectopsocus strauchi	Enderlein, 1906	Ectopsocus strauchi Enderlein, 1906	species	NAT	Borges, P. A.V.	2017
DTP Collection_2259	Palearctic	Portugal	Azores	Terceira	Praia da Vitória	Paul da Praia Vitória	Paul da Praia Vitória- Margins; PPV-T200	38°44’06.44’’N, 27°03’36.21’’W	38.735	-27.06	WGS84	6	10	2016-09-01	Night	Active aerial searching	sample 03	na	Gabriel, R.	1				1	Animalia	Arthropoda	Insecta	Psocoptera	Ectopsocidae	Ectopsocus	strauchi		Ectopsocus strauchi	Enderlein, 1906	Ectopsocus strauchi Enderlein, 1906	species	NAT	Borges, P. A.V.	2016
DTP Collection_2260	Palearctic	Portugal	Azores	Terceira	Praia da Vitória	Paul do Belo Jardim	Paul do Belo Jardim - Margins; PBJ-T203	38°42’47.95’’N, 27°03’40.93’’W	38.7134	-27.0616	WGS84	5	10	2017-08-03	Day	Beating	sample 03	Arundo donax	Pimentel, C.	3			1	4	Animalia	Arthropoda	Insecta	Psocoptera	Ectopsocidae	Ectopsocus	strauchi		Ectopsocus strauchi	Enderlein, 1906	Ectopsocus strauchi Enderlein, 1906	species	NAT	Borges, P. A.V.	2017
DTP Collection_2638	Palearctic	Portugal	Azores	Terceira	Praia da Vitória	Paul da Pedreira	Paul da Pedreira; PPCP-T202	38°42’13.09’’N; 27°02’46.37’’W	38.7043	-27.0465	WGS84	3	10	2016-08-30	Day	Beating	sample 02	Arundo donax	Pimentel, C.	12				12	Animalia	Arthropoda	Insecta	Psocoptera	Ectopsocidae	Ectopsocus	strauchi		Ectopsocus strauchi	Enderlein, 1906	Ectopsocus strauchi Enderlein, 1906	species	NAT	Borges, P. A.V.	2016
DTP Collection_2639	Palearctic	Portugal	Azores	Terceira	Praia da Vitória	Paul da Pedreira	Paul da Pedreira; PPCP-T202	38°42’13.09’’N; 27°02’46.37’’W	38.7043	-27.0465	WGS84	3	10	2016-08-31	Night	Active aerial searching	sample 02	na	Borges, P.A.V.	1			1	2	Animalia	Arthropoda	Insecta	Psocoptera	Ectopsocidae	Ectopsocus	strauchi		Ectopsocus strauchi	Enderlein, 1906	Ectopsocus strauchi Enderlein, 1906	species	NAT	Borges, P. A.V.	2016
DTP Collection_2640	Palearctic	Portugal	Azores	Terceira	Praia da Vitória	Paul da Pedreira	Paul da Pedreira; PPCP-T202	38°42’13.09’’N; 27°02’46.37’’W	38.7043	-27.0465	WGS84	3	10	2017-07-04	Day	Sweeping	sample 02	na	Pimentel, C.	1				1	Animalia	Arthropoda	Insecta	Psocoptera	Ectopsocidae	Ectopsocus	strauchi		Ectopsocus strauchi	Enderlein, 1906	Ectopsocus strauchi Enderlein, 1906	species	NAT	Borges, P. A.V.	2017
DTP Collection_2641	Palearctic	Portugal	Azores	Terceira	Praia da Vitória	Paul do Belo Jardim	Paul do Belo Jardim - Margins; PBJ-T203	38°42’47.95’’N, 27°03’40.93’’W	38.7134	-27.0616	WGS84	5	10	2017-08-03	Day	Beating	sample 02	Arundo donax	Pimentel, C.	1			2	3	Animalia	Arthropoda	Insecta	Psocoptera	Ectopsocidae	Ectopsocus	strauchi		Ectopsocus strauchi	Enderlein, 1906	Ectopsocus strauchi Enderlein, 1906	species	NAT	Borges, P. A.V.	2017
DTP Collection_2642	Palearctic	Portugal	Azores	Terceira	Praia da Vitória	Paul da Praia Vitória	Paul da Praia Vitória- Margins; PPV-T200	38°44’06.44’’N, 27°03’36.21’’W	38.735	-27.06	WGS84	6	10	2017-08-31	Night	Beating	sample 02	na	Borges, P.A.V.	2				2	Animalia	Arthropoda	Insecta	Psocoptera	Ectopsocidae	Ectopsocus	strauchi		Ectopsocus strauchi	Enderlein, 1906	Ectopsocus strauchi Enderlein, 1906	species	NAT	Borges, P. A.V.	2017
DTP Collection_2643	Palearctic	Portugal	Azores	Terceira	Praia da Vitória	Paul da Pedreira	Paul da Pedreira; PPCP-T202	38°42’13.09’’N; 27°02’46.37’’W	38.7043	-27.0465	WGS84	3	10	2017-06-21	Night	Beating	sample 02	na	Borges, P.A.V.				1	1	Animalia	Arthropoda	Insecta	Psocoptera	Ectopsocidae	Ectopsocus	strauchi		Ectopsocus strauchi	Enderlein, 1906	Ectopsocus strauchi Enderlein, 1906	species	NAT	Borges, P. A.V.	2017
DTP Collection_3040	Palearctic	Portugal	Azores	Terceira	Praia da Vitória	Paul da Pedreira	Paul da Pedreira; PPCP-T202	38°42’13.09’’N; 27°02’46.37’’W	38.7043	-27.0465	WGS84	3	10	2017-06-28	Day	Beating	sample 01	Morella faya	Pimentel, C.	1			1	2	Animalia	Arthropoda	Insecta	Psocoptera	Ectopsocidae	Ectopsocus	strauchi		Ectopsocus strauchi	Enderlein, 1906	Ectopsocus strauchi Enderlein, 1906	species	NAT	Borges, P. A.V.	2017
DTP Collection_3041	Palearctic	Portugal	Azores	Terceira	Praia da Vitória	Paul da Pedreira	Paul da Pedreira; PPCP-T202	38°42’13.09’’N; 27°02’46.37’’W	38.7043	-27.0465	WGS84	3	10	2017-06-28	Day	Beating	sample 01	Erica azorica	Pimentel, C.	1				1	Animalia	Arthropoda	Insecta	Psocoptera	Ectopsocidae	Ectopsocus	strauchi		Ectopsocus strauchi	Enderlein, 1906	Ectopsocus strauchi Enderlein, 1906	species	NAT	Borges, P. A.V.	2017
DTP Collection_3042	Palearctic	Portugal	Azores	Terceira	Praia da Vitória	Paul da Pedreira	Paul da Pedreira; PPCP-T202	38°42’13.09’’N; 27°02’46.37’’W	38.7043	-27.0465	WGS84	3	10	2017-06-29	Day	Sweeping	sample 01	na	Pimentel, C.	1				1	Animalia	Arthropoda	Insecta	Psocoptera	Ectopsocidae	Ectopsocus	strauchi		Ectopsocus strauchi	Enderlein, 1906	Ectopsocus strauchi Enderlein, 1906	species	NAT	Borges, P. A.V.	2017
DTP Collection_3043	Palearctic	Portugal	Azores	Terceira	Praia da Vitória	Paul da Praia Vitória	Paul da Praia Vitória- Margins; PPV-T200	38°44’06.44’’N, 27°03’36.21’’W	38.735	-27.06	WGS84	6	10	2017-09-06	Day	Sweeping	sample 01	na	Pimentel, C.	1				1	Animalia	Arthropoda	Insecta	Psocoptera	Ectopsocidae	Ectopsocus	strauchi		Ectopsocus strauchi	Enderlein, 1906	Ectopsocus strauchi Enderlein, 1906	species	NAT	Borges, P. A.V.	2017
DTP Collection_3044	Palearctic	Portugal	Azores	Terceira	Praia da Vitória	Paul da Praia Vitória	Paul da Praia Vitória- Margins; PPV-T200	38°44’06.44’’N, 27°03’36.21’’W	38.735	-27.06	WGS84	6	10	2017-08-09	Day	Beating	sample 01	Arundo donax	Pimentel, C.	1				1	Animalia	Arthropoda	Insecta	Psocoptera	Ectopsocidae	Ectopsocus	strauchi		Ectopsocus strauchi	Enderlein, 1906	Ectopsocus strauchi Enderlein, 1906	species	NAT	Borges, P. A.V.	2017
DTP Collection_3045	Palearctic	Portugal	Azores	Terceira	Praia da Vitória	Paul da Praia Vitória	Paul da Praia Vitória- Margins; PPV-T200	38°44’06.44’’N, 27°03’36.21’’W	38.735	-27.06	WGS84	6	10	2017-08-31	Night	Beating	sample 01	na	Pimentel, C.	1				1	Animalia	Arthropoda	Insecta	Psocoptera	Ectopsocidae	Ectopsocus	strauchi		Ectopsocus strauchi	Enderlein, 1906	Ectopsocus strauchi Enderlein, 1906	species	NAT	Borges, P. A.V.	2017
DTP Collection_3046	Palearctic	Portugal	Azores	Terceira	Praia da Vitória	Paul da Pedreira	Paul da Pedreira; PPCP-T202	38°42’13.09’’N; 27°02’46.37’’W	38.7043	-27.0465	WGS84	3	10	2017-06-28	Day	Beating	sample 01	Arundo donax	Pimentel, C.	2			1	3	Animalia	Arthropoda	Insecta	Psocoptera	Ectopsocidae	Ectopsocus	strauchi		Ectopsocus strauchi	Enderlein, 1906	Ectopsocus strauchi Enderlein, 1906	species	NAT	Borges, P. A.V.	2017
DTP Collection_958	Palearctic	Portugal	Azores	Terceira	Praia da Vitória	Paul da Praia Vitória	Paul da Praia Vitória- Margins; PPV-T200	38°44’06.44’’N, 27°03’36.21’’W	38.735	-27.06	WGS84	6	10	2017-08-23	Day/Night	Pitfall	sample 09	na	Pimentel, C.				1	1	Animalia	Arthropoda	Arachnida	Araneae	Nesticidae	Eidmannella	pallida		Eidmannella pallida	(Emerton, 1875)	Eidmannella pallida (Emerton, 1875)	species	INTR	Crespo, L.	2017
DTP Collection_2654	Palearctic	Portugal	Azores	Terceira	Praia da Vitória	Paul do Belo Jardim	Paul do Belo Jardim - Margins; PBJ-T203	38°42’47.95’’N, 27°03’40.93’’W	38.7134	-27.0616	WGS84	5	10	2016-08-31	Night	Active aerial searching	sample 02	na	Pimentel, C.	1				1	Animalia	Arthropoda	Insecta	Hemiptera	Lygaeidae	Emblethis	denticollis		Emblethis denticollis	Horváth, 1878	Emblethis denticollis Horváth, 1878	species	NAT	Borges, P. A.V.	2016
DTP Collection_758	Palearctic	Portugal	Azores	Terceira	Praia da Vitória	Paul da Praia Vitória	Paul da Praia Vitória- Margins; PPV-T200	38°44’06.44’’N, 27°03’36.21’’W	38.735	-27.06	WGS84	6	10	2016-08-30	Day	Beating	sample 10	Morella faya	Pimentel, C.			1	1	2	Animalia	Arthropoda	Arachnida	Araneae	Dictynidae	Emblyna	acoreensis		Emblyna acoreensis	Wunderlich, 1992	Emblyna acoreensis Wunderlich, 1992	species	END	Borges, P. A.V.	2016
DTP Collection_759	Palearctic	Portugal	Azores	Terceira	Praia da Vitória	Paul da Praia Vitória	Paul da Praia Vitória- Margins; PPV-T200	38°44’06.44’’N, 27°03’36.21’’W	38.735	-27.06	WGS84	6	10	2016-08-30	Day	Beating	sample 10	Arundo donax	Pimentel, C.				1	1	Animalia	Arthropoda	Arachnida	Araneae	Dictynidae	Emblyna	acoreensis		Emblyna acoreensis	Wunderlich, 1992	Emblyna acoreensis Wunderlich, 1992	species	END	Borges, P. A.V.	2016
DTP Collection_760	Palearctic	Portugal	Azores	Terceira	Praia da Vitória	Paul do Belo Jardim	Paul do Belo Jardim - Margins; PBJ-T203	38°42’47.95’’N, 27°03’40.93’’W	38.7134	-27.0616	WGS84	5	10	2016-08-08	Day	Beating	sample 10	Juncus acutus	Pimentel, C.				1	1	Animalia	Arthropoda	Arachnida	Araneae	Dictynidae	Emblyna	acoreensis		Emblyna acoreensis	Wunderlich, 1992	Emblyna acoreensis Wunderlich, 1992	species	END	Borges, P. A.V.	2016
DTP Collection_761	Palearctic	Portugal	Azores	Terceira	Praia da Vitória	Paul da Pedreira	Paul da Pedreira; PPCP-T202	38°42’13.09’’N; 27°02’46.37’’W	38.7043	-27.0465	WGS84	3	10	2016-08-30	Day	Beating	sample 10	Morella faya	Pimentel, C.			1	2	3	Animalia	Arthropoda	Arachnida	Araneae	Dictynidae	Emblyna	acoreensis		Emblyna acoreensis	Wunderlich, 1992	Emblyna acoreensis Wunderlich, 1992	species	END	Borges, P. A.V.	2016
DTP Collection_762	Palearctic	Portugal	Azores	Terceira	Praia da Vitória	Paul da Praia Vitória	Paul da Praia Vitória- Margins; PPV-T200	38°44’06.44’’N, 27°03’36.21’’W	38.735	-27.06	WGS84	6	10	2017-08-09	Day	Beating	sample 10	Arundo donax	Pimentel, C.				1	1	Animalia	Arthropoda	Arachnida	Araneae	Dictynidae	Emblyna	acoreensis		Emblyna acoreensis	Wunderlich, 1992	Emblyna acoreensis Wunderlich, 1992	species	END	Borges, P. A.V.	2017
DTP Collection_763	Palearctic	Portugal	Azores	Terceira	Praia da Vitória	Paul do Belo Jardim	Paul do Belo Jardim - Margins; PBJ-T203	38°42’47.95’’N, 27°03’40.93’’W	38.7134	-27.0616	WGS84	5	10	2017-08-03	Day	Beating	sample 10	Juncus acutus	Pimentel, C.			1	4	5	Animalia	Arthropoda	Arachnida	Araneae	Dictynidae	Emblyna	acoreensis		Emblyna acoreensis	Wunderlich, 1992	Emblyna acoreensis Wunderlich, 1992	species	END	Borges, P. A.V.	2017
DTP Collection_764	Palearctic	Portugal	Azores	Terceira	Praia da Vitória	Paul da Pedreira	Paul da Pedreira; PPCP-T202	38°42’13.09’’N; 27°02’46.37’’W	38.7043	-27.0465	WGS84	3	10	2017-06-28	Day	Beating	sample 10	Morella faya	Pimentel, C.				1	1	Animalia	Arthropoda	Arachnida	Araneae	Dictynidae	Emblyna	acoreensis		Emblyna acoreensis	Wunderlich, 1992	Emblyna acoreensis Wunderlich, 1992	species	END	Borges, P. A.V.	2017
DTP Collection_765	Palearctic	Portugal	Azores	Terceira	Praia da Vitória	Paul da Pedreira	Paul da Pedreira; PPCP-T202	38°42’13.09’’N; 27°02’46.37’’W	38.7043	-27.0465	WGS84	3	10	2017-06-28	Day	Beating	sample 10	Morella faya	Pimentel, C.		1		2	3	Animalia	Arthropoda	Arachnida	Araneae	Dictynidae	Emblyna	acoreensis		Emblyna acoreensis	Wunderlich, 1992	Emblyna acoreensis Wunderlich, 1992	species	END	Borges, P. A.V.	2017
DTP Collection_937	Palearctic	Portugal	Azores	Terceira	Praia da Vitória	Paul da Praia Vitória	Paul da Praia Vitória- Margins; PPV-T200	38°44’06.44’’N, 27°03’36.21’’W	38.735	-27.06	WGS84	6	10	2016-08-30	Day	Beating	sample 09	Morella faya	Pimentel, C.				1	1	Animalia	Arthropoda	Arachnida	Araneae	Dictynidae	Emblyna	acoreensis		Emblyna acoreensis	Wunderlich, 1992	Emblyna acoreensis Wunderlich, 1992	species	END	Borges, P. A.V.	2016
DTP Collection_938	Palearctic	Portugal	Azores	Terceira	Praia da Vitória	Paul da Praia Vitória	Paul da Praia Vitória- Margins; PPV-T200	38°44’06.44’’N, 27°03’36.21’’W	38.735	-27.06	WGS84	6	10	2016-08-30	Day	Beating	sample 09	Arundo donax	Pimentel, C.		1			1	Animalia	Arthropoda	Arachnida	Araneae	Dictynidae	Emblyna	acoreensis		Emblyna acoreensis	Wunderlich, 1992	Emblyna acoreensis Wunderlich, 1992	species	END	Borges, P. A.V.	2016
DTP Collection_939	Palearctic	Portugal	Azores	Terceira	Praia da Vitória	Paul da Pedreira	Paul da Pedreira; PPCP-T202	38°42’13.09’’N; 27°02’46.37’’W	38.7043	-27.0465	WGS84	3	10	2016-08-30	Day	Beating	sample 09	Morella faya	Pimentel, C.				1	1	Animalia	Arthropoda	Arachnida	Araneae	Dictynidae	Emblyna	acoreensis		Emblyna acoreensis	Wunderlich, 1992	Emblyna acoreensis Wunderlich, 1992	species	END	Borges, P. A.V.	2016
DTP Collection_940	Palearctic	Portugal	Azores	Terceira	Praia da Vitória	Paul da Pedreira	Paul da Pedreira; PPCP-T202	38°42’13.09’’N; 27°02’46.37’’W	38.7043	-27.0465	WGS84	3	10	2017-06-28	Day	Beating	sample 09	Morella faya	Pimentel, C.				2	2	Animalia	Arthropoda	Arachnida	Araneae	Dictynidae	Emblyna	acoreensis		Emblyna acoreensis	Wunderlich, 1992	Emblyna acoreensis Wunderlich, 1992	species	END	Borges, P. A.V.	2017
DTP Collection_1115	Palearctic	Portugal	Azores	Terceira	Praia da Vitória	Paul do Belo Jardim	Paul do Belo Jardim - Margins; PBJ-T203	38°42’47.95’’N, 27°03’40.93’’W	38.7134	-27.0616	WGS84	5	10	2016-08-08	Day	Beating	sample 08	Juncus acutus	Pimentel, C.			1	2	3	Animalia	Arthropoda	Arachnida	Araneae	Dictynidae	Emblyna	acoreensis		Emblyna acoreensis	Wunderlich, 1992	Emblyna acoreensis Wunderlich, 1992	species	END	Borges, P. A.V.	2016
DTP Collection_1116	Palearctic	Portugal	Azores	Terceira	Praia da Vitória	Paul da Pedreira	Paul da Pedreira; PPCP-T202	38°42’13.09’’N; 27°02’46.37’’W	38.7043	-27.0465	WGS84	3	10	2016-08-30	Day	Beating	sample 08	Morella faya	Pimentel, C.		1		1	2	Animalia	Arthropoda	Arachnida	Araneae	Dictynidae	Emblyna	acoreensis		Emblyna acoreensis	Wunderlich, 1992	Emblyna acoreensis Wunderlich, 1992	species	END	Borges, P. A.V.	2016
DTP Collection_1117	Palearctic	Portugal	Azores	Terceira	Praia da Vitória	Paul da Praia Vitória	Paul da Praia Vitória- Margins; PPV-T200	38°44’06.44’’N, 27°03’36.21’’W	38.735	-27.06	WGS84	6	10	2017-08-09	Day	Beating	sample 08	Morella faya	Pimentel, C.				1	1	Animalia	Arthropoda	Arachnida	Araneae	Dictynidae	Emblyna	acoreensis		Emblyna acoreensis	Wunderlich, 1992	Emblyna acoreensis Wunderlich, 1992	species	END	Borges, P. A.V.	2017
DTP Collection_1118	Palearctic	Portugal	Azores	Terceira	Praia da Vitória	Paul da Pedreira	Paul da Pedreira; PPCP-T202	38°42’13.09’’N; 27°02’46.37’’W	38.7043	-27.0465	WGS84	3	10	2017-06-28	Day	Beating	sample 08	Arundo donax	Pimentel, C.			1		1	Animalia	Arthropoda	Arachnida	Araneae	Dictynidae	Emblyna	acoreensis		Emblyna acoreensis	Wunderlich, 1992	Emblyna acoreensis Wunderlich, 1992	species	END	Borges, P. A.V.	2017
DTP Collection_1119	Palearctic	Portugal	Azores	Terceira	Praia da Vitória	Paul da Pedreira	Paul da Pedreira; PPCP-T202	38°42’13.09’’N; 27°02’46.37’’W	38.7043	-27.0465	WGS84	3	10	2017-06-28	Day	Beating	sample 08	Morella faya	Pimentel, C.		2		2	4	Animalia	Arthropoda	Arachnida	Araneae	Dictynidae	Emblyna	acoreensis		Emblyna acoreensis	Wunderlich, 1992	Emblyna acoreensis Wunderlich, 1992	species	END	Borges, P. A.V.	2017
DTP Collection_1265	Palearctic	Portugal	Azores	Terceira	Praia da Vitória	Paul do Belo Jardim	Paul do Belo Jardim - Margins; PBJ-T203	38°42’47.95’’N, 27°03’40.93’’W	38.7134	-27.0616	WGS84	5	10	2016-08-08	Day	Beating	sample 07	Juncus acutus	Pimentel, C.				2	2	Animalia	Arthropoda	Arachnida	Araneae	Dictynidae	Emblyna	acoreensis		Emblyna acoreensis	Wunderlich, 1992	Emblyna acoreensis Wunderlich, 1992	species	END	Borges, P. A.V.	2016
DTP Collection_1266	Palearctic	Portugal	Azores	Terceira	Praia da Vitória	Paul da Pedreira	Paul da Pedreira; PPCP-T202	38°42’13.09’’N; 27°02’46.37’’W	38.7043	-27.0465	WGS84	3	10	2016-08-30	Day	Beating	sample 07	Arundo donax	Pimentel, C.				2	2	Animalia	Arthropoda	Arachnida	Araneae	Dictynidae	Emblyna	acoreensis		Emblyna acoreensis	Wunderlich, 1992	Emblyna acoreensis Wunderlich, 1992	species	END	Borges, P. A.V.	2016
DTP Collection_1267	Palearctic	Portugal	Azores	Terceira	Praia da Vitória	Paul da Pedreira	Paul da Pedreira; PPCP-T202	38°42’13.09’’N; 27°02’46.37’’W	38.7043	-27.0465	WGS84	3	10	2016-08-30	Day	Beating	sample 07	Morella faya	Pimentel, C.				1	1	Animalia	Arthropoda	Arachnida	Araneae	Dictynidae	Emblyna	acoreensis		Emblyna acoreensis	Wunderlich, 1992	Emblyna acoreensis Wunderlich, 1992	species	END	Borges, P. A.V.	2016
DTP Collection_1268	Palearctic	Portugal	Azores	Terceira	Praia da Vitória	Paul da Praia Vitória	Paul da Praia Vitória- Margins; PPV-T200	38°44’06.44’’N, 27°03’36.21’’W	38.735	-27.06	WGS84	6	10	2017-08-09	Day	Beating	sample 07	Morella faya	Pimentel, C.		2	1		3	Animalia	Arthropoda	Arachnida	Araneae	Dictynidae	Emblyna	acoreensis		Emblyna acoreensis	Wunderlich, 1992	Emblyna acoreensis Wunderlich, 1992	species	END	Borges, P. A.V.	2017
DTP Collection_1420	Palearctic	Portugal	Azores	Terceira	Praia da Vitória	Paul da Praia Vitória	Paul da Praia Vitória- Margins; PPV-T200	38°44’06.44’’N, 27°03’36.21’’W	38.735	-27.06	WGS84	6	10	2016-08-30	Day	Beating	sample 06	Morella faya	Pimentel, C.			1		1	Animalia	Arthropoda	Arachnida	Araneae	Dictynidae	Emblyna	acoreensis		Emblyna acoreensis	Wunderlich, 1992	Emblyna acoreensis Wunderlich, 1992	species	END	Borges, P. A.V.	2016
DTP Collection_1421	Palearctic	Portugal	Azores	Terceira	Praia da Vitória	Paul do Belo Jardim	Paul do Belo Jardim - Margins; PBJ-T203	38°42’47.95’’N, 27°03’40.93’’W	38.7134	-27.0616	WGS84	5	10	2016-08-08	Day	Beating	sample 06	Arundo donax	Pimentel, C.				3	3	Animalia	Arthropoda	Arachnida	Araneae	Dictynidae	Emblyna	acoreensis		Emblyna acoreensis	Wunderlich, 1992	Emblyna acoreensis Wunderlich, 1992	species	END	Borges, P. A.V.	2016
DTP Collection_1422	Palearctic	Portugal	Azores	Terceira	Praia da Vitória	Paul da Pedreira	Paul da Pedreira; PPCP-T202	38°42’13.09’’N; 27°02’46.37’’W	38.7043	-27.0465	WGS84	3	10	2016-08-30	Day	Beating	sample 06	Morella faya	Pimentel, C.		1		1	2	Animalia	Arthropoda	Arachnida	Araneae	Dictynidae	Emblyna	acoreensis		Emblyna acoreensis	Wunderlich, 1992	Emblyna acoreensis Wunderlich, 1992	species	END	Borges, P. A.V.	2016
DTP Collection_1423	Palearctic	Portugal	Azores	Terceira	Praia da Vitória	Paul da Pedreira	Paul da Pedreira; PPCP-T202	38°42’13.09’’N; 27°02’46.37’’W	38.7043	-27.0465	WGS84	3	10	2016-09-15	Day	Sweeping	sample 06	na	Goulart, S. & Pimentel, C.			1		1	Animalia	Arthropoda	Arachnida	Araneae	Dictynidae	Emblyna	acoreensis		Emblyna acoreensis	Wunderlich, 1992	Emblyna acoreensis Wunderlich, 1992	species	END	Borges, P. A.V.	2016
DTP Collection_1424	Palearctic	Portugal	Azores	Terceira	Praia da Vitória	Paul da Praia Vitória	Paul da Praia Vitória- Margins; PPV-T200	38°44’06.44’’N, 27°03’36.21’’W	38.735	-27.06	WGS84	6	10	2017-08-09	Day	Beating	sample 06	Morella faya	Pimentel, C.			1	10	11	Animalia	Arthropoda	Arachnida	Araneae	Dictynidae	Emblyna	acoreensis		Emblyna acoreensis	Wunderlich, 1992	Emblyna acoreensis Wunderlich, 1992	species	END	Borges, P. A.V.	2017
DTP Collection_1425	Palearctic	Portugal	Azores	Terceira	Praia da Vitória	Paul da Pedreira	Paul da Pedreira; PPCP-T202	38°42’13.09’’N; 27°02’46.37’’W	38.7043	-27.0465	WGS84	3	10	2017-06-28	Day	Beating	sample 06	Morella faya	Pimentel, C.				1	1	Animalia	Arthropoda	Arachnida	Araneae	Dictynidae	Emblyna	acoreensis		Emblyna acoreensis	Wunderlich, 1992	Emblyna acoreensis Wunderlich, 1992	species	END	Borges, P. A.V.	2017
DTP Collection_1590	Palearctic	Portugal	Azores	Terceira	Praia da Vitória	Paul da Praia Vitória	Paul da Praia Vitória- Margins; PPV-T200	38°44’06.44’’N, 27°03’36.21’’W	38.735	-27.06	WGS84	6	10	2016-08-30	Day	Beating	sample 05	Morella faya	Pimentel, C.		5	2	8	15	Animalia	Arthropoda	Arachnida	Araneae	Dictynidae	Emblyna	acoreensis		Emblyna acoreensis	Wunderlich, 1992	Emblyna acoreensis Wunderlich, 1992	species	END	Borges, P. A.V.	2016
DTP Collection_1591	Palearctic	Portugal	Azores	Terceira	Praia da Vitória	Paul da Praia Vitória	Paul da Praia Vitória- Margins; PPV-T200	38°44’06.44’’N, 27°03’36.21’’W	38.735	-27.06	WGS84	6	10	2016-08-30	Day	Beating	sample 05	Arundo donax	Pimentel, C.				1	1	Animalia	Arthropoda	Arachnida	Araneae	Dictynidae	Emblyna	acoreensis		Emblyna acoreensis	Wunderlich, 1992	Emblyna acoreensis Wunderlich, 1992	species	END	Borges, P. A.V.	2016
DTP Collection_1592	Palearctic	Portugal	Azores	Terceira	Praia da Vitória	Paul do Belo Jardim	Paul do Belo Jardim - Margins; PBJ-T203	38°42’47.95’’N, 27°03’40.93’’W	38.7134	-27.0616	WGS84	5	10	2016-08-08	Day	Beating	sample 05	Juncus acutus	Pimentel, C.				1	1	Animalia	Arthropoda	Arachnida	Araneae	Dictynidae	Emblyna	acoreensis		Emblyna acoreensis	Wunderlich, 1992	Emblyna acoreensis Wunderlich, 1992	species	END	Borges, P. A.V.	2016
DTP Collection_1593	Palearctic	Portugal	Azores	Terceira	Praia da Vitória	Paul do Belo Jardim	Paul do Belo Jardim - Margins; PBJ-T203	38°42’47.95’’N, 27°03’40.93’’W	38.7134	-27.0616	WGS84	5	10	2016-08-08	Day	Beating	sample 05	Arundo donax	Pimentel, C.				14	14	Animalia	Arthropoda	Arachnida	Araneae	Dictynidae	Emblyna	acoreensis		Emblyna acoreensis	Wunderlich, 1992	Emblyna acoreensis Wunderlich, 1992	species	END	Borges, P. A.V.	2016
DTP Collection_1594	Palearctic	Portugal	Azores	Terceira	Praia da Vitória	Paul da Pedreira	Paul da Pedreira; PPCP-T202	38°42’13.09’’N; 27°02’46.37’’W	38.7043	-27.0465	WGS84	3	10	2016-08-30	Day	Beating	sample 05	Arundo donax	Pimentel, C.		1			1	Animalia	Arthropoda	Arachnida	Araneae	Dictynidae	Emblyna	acoreensis		Emblyna acoreensis	Wunderlich, 1992	Emblyna acoreensis Wunderlich, 1992	species	END	Borges, P. A.V.	2016
DTP Collection_1595	Palearctic	Portugal	Azores	Terceira	Praia da Vitória	Paul da Pedreira	Paul da Pedreira; PPCP-T202	38°42’13.09’’N; 27°02’46.37’’W	38.7043	-27.0465	WGS84	3	10	2016-08-30	Day	Beating	sample 05	Morella faya	Pimentel, C.				6	6	Animalia	Arthropoda	Arachnida	Araneae	Dictynidae	Emblyna	acoreensis		Emblyna acoreensis	Wunderlich, 1992	Emblyna acoreensis Wunderlich, 1992	species	END	Borges, P. A.V.	2016
DTP Collection_1596	Palearctic	Portugal	Azores	Terceira	Praia da Vitória	Paul da Praia Vitória	Paul da Praia Vitória- Margins; PPV-T200	38°44’06.44’’N, 27°03’36.21’’W	38.735	-27.06	WGS84	6	10	2017-08-09	Day	Beating	sample 05	Arundo donax	Pimentel, C.				4	4	Animalia	Arthropoda	Arachnida	Araneae	Dictynidae	Emblyna	acoreensis		Emblyna acoreensis	Wunderlich, 1992	Emblyna acoreensis Wunderlich, 1992	species	END	Borges, P. A.V.	2017
DTP Collection_1597	Palearctic	Portugal	Azores	Terceira	Praia da Vitória	Paul da Praia Vitória	Paul da Praia Vitória- Margins; PPV-T200	38°44’06.44’’N, 27°03’36.21’’W	38.735	-27.06	WGS84	6	10	2017-08-09	Day	Beating	sample 05	Morella faya	Pimentel, C.		1	3	1	5	Animalia	Arthropoda	Arachnida	Araneae	Dictynidae	Emblyna	acoreensis		Emblyna acoreensis	Wunderlich, 1992	Emblyna acoreensis Wunderlich, 1992	species	END	Borges, P. A.V.	2017
DTP Collection_1598	Palearctic	Portugal	Azores	Terceira	Praia da Vitória	Paul da Pedreira	Paul da Pedreira; PPCP-T202	38°42’13.09’’N; 27°02’46.37’’W	38.7043	-27.0465	WGS84	3	10	2017-06-28	Day	Beating	sample 05	Erica azorica	Pimentel, C.		3		32	35	Animalia	Arthropoda	Arachnida	Araneae	Dictynidae	Emblyna	acoreensis		Emblyna acoreensis	Wunderlich, 1992	Emblyna acoreensis Wunderlich, 1992	species	END	Borges, P. A.V.	2017
DTP Collection_1793	Palearctic	Portugal	Azores	Terceira	Praia da Vitória	Paul da Praia Vitória	Paul da Praia Vitória- Margins; PPV-T200	38°44’06.44’’N, 27°03’36.21’’W	38.735	-27.06	WGS84	6	10	2016-08-30	Day	Beating	sample 04	Morella faya	Pimentel, C.		1	1	3	5	Animalia	Arthropoda	Arachnida	Araneae	Dictynidae	Emblyna	acoreensis		Emblyna acoreensis	Wunderlich, 1992	Emblyna acoreensis Wunderlich, 1992	species	END	Borges, P. A.V.	2016
DTP Collection_1794	Palearctic	Portugal	Azores	Terceira	Praia da Vitória	Paul da Praia Vitória	Paul da Praia Vitória- Margins; PPV-T200	38°44’06.44’’N, 27°03’36.21’’W	38.735	-27.06	WGS84	6	10	2016-08-30	Day	Beating	sample 04	Arundo donax	Pimentel, C.		1			1	Animalia	Arthropoda	Arachnida	Araneae	Dictynidae	Emblyna	acoreensis		Emblyna acoreensis	Wunderlich, 1992	Emblyna acoreensis Wunderlich, 1992	species	END	Borges, P. A.V.	2016
DTP Collection_1795	Palearctic	Portugal	Azores	Terceira	Praia da Vitória	Paul da Pedreira	Paul da Pedreira; PPCP-T202	38°42’13.09’’N; 27°02’46.37’’W	38.7043	-27.0465	WGS84	3	10	2016-08-30	Day	Beating	sample 04	Arundo donax	Pimentel, C.		1			1	Animalia	Arthropoda	Arachnida	Araneae	Dictynidae	Emblyna	acoreensis		Emblyna acoreensis	Wunderlich, 1992	Emblyna acoreensis Wunderlich, 1992	species	END	Borges, P. A.V.	2016
DTP Collection_1796	Palearctic	Portugal	Azores	Terceira	Praia da Vitória	Paul da Pedreira	Paul da Pedreira; PPCP-T202	38°42’13.09’’N; 27°02’46.37’’W	38.7043	-27.0465	WGS84	3	10	2016-08-30	Day	Beating	sample 04	Morella faya	Pimentel, C.				2	2	Animalia	Arthropoda	Arachnida	Araneae	Dictynidae	Emblyna	acoreensis		Emblyna acoreensis	Wunderlich, 1992	Emblyna acoreensis Wunderlich, 1992	species	END	Borges, P. A.V.	2016
DTP Collection_1797	Palearctic	Portugal	Azores	Terceira	Praia da Vitória	Paul da Praia Vitória	Paul da Praia Vitória- Margins; PPV-T200	38°44’06.44’’N, 27°03’36.21’’W	38.735	-27.06	WGS84	6	10	2016-09-15	Day	Sweeping	sample 04	na	Goulart, S. & Pimentel, C.		1	2		3	Animalia	Arthropoda	Arachnida	Araneae	Dictynidae	Emblyna	acoreensis		Emblyna acoreensis	Wunderlich, 1992	Emblyna acoreensis Wunderlich, 1992	species	END	Borges, P. A.V.	2016
DTP Collection_1798	Palearctic	Portugal	Azores	Terceira	Praia da Vitória	Paul da Praia Vitória	Paul da Praia Vitória- Margins; PPV-T200	38°44’06.44’’N, 27°03’36.21’’W	38.735	-27.06	WGS84	6	10	2017-08-09	Day	Beating	sample 04	Morella faya	Pimentel, C.		3	1	20	24	Animalia	Arthropoda	Arachnida	Araneae	Dictynidae	Emblyna	acoreensis		Emblyna acoreensis	Wunderlich, 1992	Emblyna acoreensis Wunderlich, 1992	species	END	Borges, P. A.V.	2017
DTP Collection_1799	Palearctic	Portugal	Azores	Terceira	Praia da Vitória	Paul do Belo Jardim	Paul do Belo Jardim - Margins; PBJ-T203	38°42’47.95’’N, 27°03’40.93’’W	38.7134	-27.0616	WGS84	5	10	2017-08-03	Day	Beating	sample 04	Juncus acutus	Pimentel, C.				1	1	Animalia	Arthropoda	Arachnida	Araneae	Dictynidae	Emblyna	acoreensis		Emblyna acoreensis	Wunderlich, 1992	Emblyna acoreensis Wunderlich, 1992	species	END	Borges, P. A.V.	2017
DTP Collection_1800	Palearctic	Portugal	Azores	Terceira	Praia da Vitória	Paul da Praia Vitória	Paul da Praia Vitória- Margins; PPV-T200	38°44’06.44’’N, 27°03’36.21’’W	38.735	-27.06	WGS84	6	10	2017-08-31	Night	Active aerial searching	sample 04	na	Gabriel, R.		1			1	Animalia	Arthropoda	Arachnida	Araneae	Dictynidae	Emblyna	acoreensis		Emblyna acoreensis	Wunderlich, 1992	Emblyna acoreensis Wunderlich, 1992	species	END	Borges, P. A.V.	2017
DTP Collection_1801	Palearctic	Portugal	Azores	Terceira	Praia da Vitória	Paul da Pedreira	Paul da Pedreira; PPCP-T202	38°42’13.09’’N; 27°02’46.37’’W	38.7043	-27.0465	WGS84	3	10	2016-06-21	Night	Sweeping	sample 04	na	Gabriel, R.				6	6	Animalia	Arthropoda	Arachnida	Araneae	Dictynidae	Emblyna	acoreensis		Emblyna acoreensis	Wunderlich, 1992	Emblyna acoreensis Wunderlich, 1992	species	END	Borges, P. A.V.	2016
DTP Collection_1802	Palearctic	Portugal	Azores	Terceira	Praia da Vitória	Paul da Pedreira	Paul da Pedreira; PPCP-T202	38°42’13.09’’N; 27°02’46.37’’W	38.7043	-27.0465	WGS84	3	10	2017-06-28	Day	Beating	sample 04	Erica azorica	Pimentel, C.		3	2	13	18	Animalia	Arthropoda	Arachnida	Araneae	Dictynidae	Emblyna	acoreensis		Emblyna acoreensis	Wunderlich, 1992	Emblyna acoreensis Wunderlich, 1992	species	END	Borges, P. A.V.	2017
DTP Collection_2124	Palearctic	Portugal	Azores	Terceira	Praia da Vitória	Paul da Praia Vitória	Paul da Praia Vitória- Margins; PPV-T200	38°44’06.44’’N, 27°03’36.21’’W	38.735	-27.06	WGS84	6	10	2016-08-30	Day	Beating	sample 03	Morella faya	Pimentel, C.		6	1	13	20	Animalia	Arthropoda	Arachnida	Araneae	Dictynidae	Emblyna	acoreensis		Emblyna acoreensis	Wunderlich, 1992	Emblyna acoreensis Wunderlich, 1992	species	END	Borges, P. A.V.	2016
DTP Collection_2125	Palearctic	Portugal	Azores	Terceira	Praia da Vitória	Paul da Pedreira	Paul da Pedreira; PPCP-T202	38°42’13.09’’N; 27°02’46.37’’W	38.7043	-27.0465	WGS84	3	10	2016-08-30	Day	Beating	sample 03	Arundo donax	Pimentel, C.				1	1	Animalia	Arthropoda	Arachnida	Araneae	Dictynidae	Emblyna	acoreensis		Emblyna acoreensis	Wunderlich, 1992	Emblyna acoreensis Wunderlich, 1992	species	END	Borges, P. A.V.	2016
DTP Collection_2126	Palearctic	Portugal	Azores	Terceira	Praia da Vitória	Paul da Pedreira	Paul da Pedreira; PPCP-T202	38°42’13.09’’N; 27°02’46.37’’W	38.7043	-27.0465	WGS84	3	10	2016-08-30	Day	Beating	sample 03	Morella faya	Pimentel, C.		1	2	1	4	Animalia	Arthropoda	Arachnida	Araneae	Dictynidae	Emblyna	acoreensis		Emblyna acoreensis	Wunderlich, 1992	Emblyna acoreensis Wunderlich, 1992	species	END	Borges, P. A.V.	2016
DTP Collection_2127	Palearctic	Portugal	Azores	Terceira	Praia da Vitória	Paul da Praia Vitória	Paul da Praia Vitória- Margins; PPV-T200	38°44’06.44’’N, 27°03’36.21’’W	38.735	-27.06	WGS84	6	10	2016-09-15	Day	Sweeping	sample 03	na	Goulart, S. & Pimentel, C.		1			1	Animalia	Arthropoda	Arachnida	Araneae	Dictynidae	Emblyna	acoreensis		Emblyna acoreensis	Wunderlich, 1992	Emblyna acoreensis Wunderlich, 1992	species	END	Borges, P. A.V.	2016
DTP Collection_2128	Palearctic	Portugal	Azores	Terceira	Praia da Vitória	Paul da Pedreira	Paul da Pedreira; PPCP-T202	38°42’13.09’’N; 27°02’46.37’’W	38.7043	-27.0465	WGS84	3	10	2016-08-31	Night	Active aerial searching	sample 03	na	Gabriel, R.		2			2	Animalia	Arthropoda	Arachnida	Araneae	Dictynidae	Emblyna	acoreensis		Emblyna acoreensis	Wunderlich, 1992	Emblyna acoreensis Wunderlich, 1992	species	END	Borges, P. A.V.	2016
DTP Collection_2129	Palearctic	Portugal	Azores	Terceira	Praia da Vitória	Paul da Praia Vitória	Paul da Praia Vitória- Margins; PPV-T200	38°44’06.44’’N, 27°03’36.21’’W	38.735	-27.06	WGS84	6	10	2016-09-01	Night	Active aerial searching	sample 03	na	Gabriel, R.		1	1		2	Animalia	Arthropoda	Arachnida	Araneae	Dictynidae	Emblyna	acoreensis		Emblyna acoreensis	Wunderlich, 1992	Emblyna acoreensis Wunderlich, 1992	species	END	Borges, P. A.V.	2016
DTP Collection_2130	Palearctic	Portugal	Azores	Terceira	Praia da Vitória	Paul da Praia Vitória	Paul da Praia Vitória- Margins; PPV-T200	38°44’06.44’’N, 27°03’36.21’’W	38.735	-27.06	WGS84	6	10	2017-08-09	Day	Beating	sample 03	Morella faya	Pimentel, C.			1	3	4	Animalia	Arthropoda	Arachnida	Araneae	Dictynidae	Emblyna	acoreensis		Emblyna acoreensis	Wunderlich, 1992	Emblyna acoreensis Wunderlich, 1992	species	END	Borges, P. A.V.	2017
DTP Collection_2131	Palearctic	Portugal	Azores	Terceira	Praia da Vitória	Paul do Belo Jardim	Paul do Belo Jardim - Margins; PBJ-T203	38°42’47.95’’N, 27°03’40.93’’W	38.7134	-27.0616	WGS84	5	10	2017-08-03	Day	Beating	sample 03	Juncus acutus	Pimentel, C.				5	5	Animalia	Arthropoda	Arachnida	Araneae	Dictynidae	Emblyna	acoreensis		Emblyna acoreensis	Wunderlich, 1992	Emblyna acoreensis Wunderlich, 1992	species	END	Borges, P. A.V.	2017
DTP Collection_2132	Palearctic	Portugal	Azores	Terceira	Praia da Vitória	Paul da Praia Vitória	Paul da Praia Vitória- Margins; PPV-T200	38°44’06.44’’N, 27°03’36.21’’W	38.735	-27.06	WGS84	6	10	2017-08-31	Night	Active aerial searching	sample 03	na	Borges, P.A.V.		2			2	Animalia	Arthropoda	Arachnida	Araneae	Dictynidae	Emblyna	acoreensis		Emblyna acoreensis	Wunderlich, 1992	Emblyna acoreensis Wunderlich, 1992	species	END	Borges, P. A.V.	2017
DTP Collection_2133	Palearctic	Portugal	Azores	Terceira	Praia da Vitória	Paul da Praia Vitória	Paul da Praia Vitória- Margins; PPV-T200	38°44’06.44’’N, 27°03’36.21’’W	38.735	-27.06	WGS84	6	10	2017-08-31	Night	Sweeping	sample 03	na	Gabriel, R.		1	1		2	Animalia	Arthropoda	Arachnida	Araneae	Dictynidae	Emblyna	acoreensis		Emblyna acoreensis	Wunderlich, 1992	Emblyna acoreensis Wunderlich, 1992	species	END	Borges, P. A.V.	2017
DTP Collection_2134	Palearctic	Portugal	Azores	Terceira	Praia da Vitória	Paul da Pedreira	Paul da Pedreira; PPCP-T202	38°42’13.09’’N; 27°02’46.37’’W	38.7043	-27.0465	WGS84	3	10	2016-06-21	Night	Sweeping	sample 03	na	Brito, M.			3		3	Animalia	Arthropoda	Arachnida	Araneae	Dictynidae	Emblyna	acoreensis		Emblyna acoreensis	Wunderlich, 1992	Emblyna acoreensis Wunderlich, 1992	species	END	Borges, P. A.V.	2016
DTP Collection_2135	Palearctic	Portugal	Azores	Terceira	Praia da Vitória	Paul da Pedreira	Paul da Pedreira; PPCP-T202	38°42’13.09’’N; 27°02’46.37’’W	38.7043	-27.0465	WGS84	3	10	2017-06-28	Day	Beating	sample 03	Morella faya	Pimentel, C.				1	1	Animalia	Arthropoda	Arachnida	Araneae	Dictynidae	Emblyna	acoreensis		Emblyna acoreensis	Wunderlich, 1992	Emblyna acoreensis Wunderlich, 1992	species	END	Borges, P. A.V.	2017
DTP Collection_2136	Palearctic	Portugal	Azores	Terceira	Praia da Vitória	Paul da Pedreira	Paul da Pedreira; PPCP-T202	38°42’13.09’’N; 27°02’46.37’’W	38.7043	-27.0465	WGS84	3	10	2017-06-28	Day	Beating	sample 03	Erica azorica	Pimentel, C.				17	17	Animalia	Arthropoda	Arachnida	Araneae	Dictynidae	Emblyna	acoreensis		Emblyna acoreensis	Wunderlich, 1992	Emblyna acoreensis Wunderlich, 1992	species	END	Borges, P. A.V.	2017
DTP Collection_2462	Palearctic	Portugal	Azores	Terceira	Praia da Vitória	Paul da Praia Vitória	Paul da Praia Vitória- Margins; PPV-T200	38°44’06.44’’N, 27°03’36.21’’W	38.735	-27.06	WGS84	6	10	2016-08-30	Day	Beating	sample 02	Morella faya	Pimentel, C.		1	1	2	4	Animalia	Arthropoda	Arachnida	Araneae	Dictynidae	Emblyna	acoreensis		Emblyna acoreensis	Wunderlich, 1992	Emblyna acoreensis Wunderlich, 1992	species	END	Borges, P. A.V.	2016
DTP Collection_2463	Palearctic	Portugal	Azores	Terceira	Praia da Vitória	Paul do Belo Jardim	Paul do Belo Jardim - Margins; PBJ-T203	38°42’47.95’’N, 27°03’40.93’’W	38.7134	-27.0616	WGS84	5	10	2016-08-08	Day	Beating	sample 02	Arundo donax	Pimentel, C.				2	2	Animalia	Arthropoda	Arachnida	Araneae	Dictynidae	Emblyna	acoreensis		Emblyna acoreensis	Wunderlich, 1992	Emblyna acoreensis Wunderlich, 1992	species	END	Borges, P. A.V.	2016
DTP Collection_2464	Palearctic	Portugal	Azores	Terceira	Praia da Vitória	Paul da Pedreira	Paul da Pedreira; PPCP-T202	38°42’13.09’’N; 27°02’46.37’’W	38.7043	-27.0465	WGS84	3	10	2016-08-30	Day	Beating	sample 02	Arundo donax	Pimentel, C.		1	1	2	4	Animalia	Arthropoda	Arachnida	Araneae	Dictynidae	Emblyna	acoreensis		Emblyna acoreensis	Wunderlich, 1992	Emblyna acoreensis Wunderlich, 1992	species	END	Borges, P. A.V.	2016
DTP Collection_2465	Palearctic	Portugal	Azores	Terceira	Praia da Vitória	Paul da Pedreira	Paul da Pedreira; PPCP-T202	38°42’13.09’’N; 27°02’46.37’’W	38.7043	-27.0465	WGS84	3	10	2016-08-30	Day	Beating	sample 02	Morella faya	Pimentel, C.		4	2	2	8	Animalia	Arthropoda	Arachnida	Araneae	Dictynidae	Emblyna	acoreensis		Emblyna acoreensis	Wunderlich, 1992	Emblyna acoreensis Wunderlich, 1992	species	END	Borges, P. A.V.	2016
DTP Collection_2466	Palearctic	Portugal	Azores	Terceira	Praia da Vitória	Paul do Belo Jardim	Paul do Belo Jardim - Margins; PBJ-T203	38°42’47.95’’N, 27°03’40.93’’W	38.7134	-27.0616	WGS84	5	10	2016-09-15	Day	Sweeping	sample 02	na	Goulart, S. & Pimentel, C.			2		2	Animalia	Arthropoda	Arachnida	Araneae	Dictynidae	Emblyna	acoreensis		Emblyna acoreensis	Wunderlich, 1992	Emblyna acoreensis Wunderlich, 1992	species	END	Borges, P. A.V.	2016
DTP Collection_2467	Palearctic	Portugal	Azores	Terceira	Praia da Vitória	Paul da Pedreira	Paul da Pedreira; PPCP-T202	38°42’13.09’’N; 27°02’46.37’’W	38.7043	-27.0465	WGS84	3	10	2016-08-31	Night	Active aerial searching	sample 02	na	Borges, P.A.V.				1	1	Animalia	Arthropoda	Arachnida	Araneae	Dictynidae	Emblyna	acoreensis		Emblyna acoreensis	Wunderlich, 1992	Emblyna acoreensis Wunderlich, 1992	species	END	Borges, P. A.V.	2016
DTP Collection_2468	Palearctic	Portugal	Azores	Terceira	Praia da Vitória	Paul da Praia Vitória	Paul da Praia Vitória- Margins; PPV-T200	38°44’06.44’’N, 27°03’36.21’’W	38.735	-27.06	WGS84	6	10	2016-09-01	Night	Active aerial searching	sample 02	na	Borges, P.A.V.		1	2		3	Animalia	Arthropoda	Arachnida	Araneae	Dictynidae	Emblyna	acoreensis		Emblyna acoreensis	Wunderlich, 1992	Emblyna acoreensis Wunderlich, 1992	species	END	Borges, P. A.V.	2016
DTP Collection_2469	Palearctic	Portugal	Azores	Terceira	Praia da Vitória	Paul da Praia Vitória	Paul da Praia Vitória- Margins; PPV-T200	38°44’06.44’’N, 27°03’36.21’’W	38.735	-27.06	WGS84	6	10	2017-08-09	Day	Beating	sample 02	Morella faya	Pimentel, C.				6	6	Animalia	Arthropoda	Arachnida	Araneae	Dictynidae	Emblyna	acoreensis		Emblyna acoreensis	Wunderlich, 1992	Emblyna acoreensis Wunderlich, 1992	species	END	Borges, P. A.V.	2017
DTP Collection_2470	Palearctic	Portugal	Azores	Terceira	Praia da Vitória	Paul da Pedreira	Paul da Pedreira; PPCP-T202	38°42’13.09’’N; 27°02’46.37’’W	38.7043	-27.0465	WGS84	3	10	2017-07-04	Day	Sweeping	sample 02	na	Pimentel, C.		2		2	4	Animalia	Arthropoda	Arachnida	Araneae	Dictynidae	Emblyna	acoreensis		Emblyna acoreensis	Wunderlich, 1992	Emblyna acoreensis Wunderlich, 1992	species	END	Borges, P. A.V.	2017
DTP Collection_2471	Palearctic	Portugal	Azores	Terceira	Praia da Vitória	Paul da Praia Vitória	Paul da Praia Vitória- Margins; PPV-T200	38°44’06.44’’N, 27°03’36.21’’W	38.735	-27.06	WGS84	6	10	2017-09-13	Day	Sweeping	sample 02	na	Pimentel, C.		2			2	Animalia	Arthropoda	Arachnida	Araneae	Dictynidae	Emblyna	acoreensis		Emblyna acoreensis	Wunderlich, 1992	Emblyna acoreensis Wunderlich, 1992	species	END	Borges, P. A.V.	2017
DTP Collection_2472	Palearctic	Portugal	Azores	Terceira	Praia da Vitória	Paul da Praia Vitória	Paul da Praia Vitória- Margins; PPV-T200	38°44’06.44’’N, 27°03’36.21’’W	38.735	-27.06	WGS84	6	10	2017-08-31	Night	Beating	sample 02	na	Borges, P.A.V.		4	2		6	Animalia	Arthropoda	Arachnida	Araneae	Dictynidae	Emblyna	acoreensis		Emblyna acoreensis	Wunderlich, 1992	Emblyna acoreensis Wunderlich, 1992	species	END	Borges, P. A.V.	2017
DTP Collection_2473	Palearctic	Portugal	Azores	Terceira	Praia da Vitória	Paul da Pedreira	Paul da Pedreira; PPCP-T202	38°42’13.09’’N; 27°02’46.37’’W	38.7043	-27.0465	WGS84	3	10	2017-06-21	Night	Active aerial searching	sample 02	na	Brito, M.		1			1	Animalia	Arthropoda	Arachnida	Araneae	Dictynidae	Emblyna	acoreensis		Emblyna acoreensis	Wunderlich, 1992	Emblyna acoreensis Wunderlich, 1992	species	END	Borges, P. A.V.	2017
DTP Collection_2474	Palearctic	Portugal	Azores	Terceira	Praia da Vitória	Paul da Pedreira	Paul da Pedreira; PPCP-T202	38°42’13.09’’N; 27°02’46.37’’W	38.7043	-27.0465	WGS84	3	10	2017-06-21	Night	Beating	sample 02	na	Borges, P.A.V.		1		1	2	Animalia	Arthropoda	Arachnida	Araneae	Dictynidae	Emblyna	acoreensis		Emblyna acoreensis	Wunderlich, 1992	Emblyna acoreensis Wunderlich, 1992	species	END	Borges, P. A.V.	2017
DTP Collection_2475	Palearctic	Portugal	Azores	Terceira	Praia da Vitória	Paul da Pedreira	Paul da Pedreira; PPCP-T202	38°42’13.09’’N; 27°02’46.37’’W	38.7043	-27.0465	WGS84	3	10	2017-06-28	Day	Beating	sample 02	Morella faya	Pimentel, C.			2	4	6	Animalia	Arthropoda	Arachnida	Araneae	Dictynidae	Emblyna	acoreensis		Emblyna acoreensis	Wunderlich, 1992	Emblyna acoreensis Wunderlich, 1992	species	END	Borges, P. A.V.	2017
DTP Collection_2884	Palearctic	Portugal	Azores	Terceira	Praia da Vitória	Paul do Belo Jardim	Paul do Belo Jardim - Margins; PBJ-T203	38°42’47.95’’N, 27°03’40.93’’W	38.7134	-27.0616	WGS84	5	10	2016-08-08	Day	Beating	sample 01	Arundo donax	Pimentel, C.		1	1		2	Animalia	Arthropoda	Arachnida	Araneae	Dictynidae	Emblyna	acoreensis		Emblyna acoreensis	Wunderlich, 1992	Emblyna acoreensis Wunderlich, 1992	species	END	Borges, P. A.V.	2016
DTP Collection_2885	Palearctic	Portugal	Azores	Terceira	Praia da Vitória	Paul da Pedreira	Paul da Pedreira; PPCP-T202	38°42’13.09’’N; 27°02’46.37’’W	38.7043	-27.0465	WGS84	3	10	2016-08-30	Day	Beating	sample 01	Arundo donax	Pimentel, C.				2	2	Animalia	Arthropoda	Arachnida	Araneae	Dictynidae	Emblyna	acoreensis		Emblyna acoreensis	Wunderlich, 1992	Emblyna acoreensis Wunderlich, 1992	species	END	Borges, P. A.V.	2016
DTP Collection_2886	Palearctic	Portugal	Azores	Terceira	Praia da Vitória	Paul da Pedreira	Paul da Pedreira; PPCP-T202	38°42’13.09’’N; 27°02’46.37’’W	38.7043	-27.0465	WGS84	3	10	2016-08-30	Day	Beating	sample 01	Morella faya	Pimentel, C.		1	2	1	4	Animalia	Arthropoda	Arachnida	Araneae	Dictynidae	Emblyna	acoreensis		Emblyna acoreensis	Wunderlich, 1992	Emblyna acoreensis Wunderlich, 1992	species	END	Borges, P. A.V.	2016
DTP Collection_2887	Palearctic	Portugal	Azores	Terceira	Praia da Vitória	Paul do Belo Jardim	Paul do Belo Jardim - Margins; PBJ-T203	38°42’47.95’’N, 27°03’40.93’’W	38.7134	-27.0616	WGS84	5	10	2016-09-15	Day	Sweeping	sample 01	na	Goulart, S. & Pimentel, C.				1	1	Animalia	Arthropoda	Arachnida	Araneae	Dictynidae	Emblyna	acoreensis		Emblyna acoreensis	Wunderlich, 1992	Emblyna acoreensis Wunderlich, 1992	species	END	Borges, P. A.V.	2016
DTP Collection_2888	Palearctic	Portugal	Azores	Terceira	Praia da Vitória	Paul da Pedreira	Paul da Pedreira; PPCP-T202	38°42’13.09’’N; 27°02’46.37’’W	38.7043	-27.0465	WGS84	3	10	2017-06-28	Day	Beating	sample 01	Morella faya	Pimentel, C.				5	5	Animalia	Arthropoda	Arachnida	Araneae	Dictynidae	Emblyna	acoreensis		Emblyna acoreensis	Wunderlich, 1992	Emblyna acoreensis Wunderlich, 1992	species	END	Borges, P. A.V.	2017
DTP Collection_2889	Palearctic	Portugal	Azores	Terceira	Praia da Vitória	Paul da Pedreira	Paul da Pedreira; PPCP-T202	38°42’13.09’’N; 27°02’46.37’’W	38.7043	-27.0465	WGS84	3	10	2017-06-29	Day	Sweeping	sample 01	na	Pimentel, C.			1		1	Animalia	Arthropoda	Arachnida	Araneae	Dictynidae	Emblyna	acoreensis		Emblyna acoreensis	Wunderlich, 1992	Emblyna acoreensis Wunderlich, 1992	species	END	Borges, P. A.V.	2017
DTP Collection_2890	Palearctic	Portugal	Azores	Terceira	Praia da Vitória	Paul do Belo Jardim	Paul do Belo Jardim - Margins; PBJ-T203	38°42’47.95’’N, 27°03’40.93’’W	38.7134	-27.0616	WGS84	5	10	2017-09-06	Day	Sweeping	sample 01	na	Pimentel, C.				2	2	Animalia	Arthropoda	Arachnida	Araneae	Dictynidae	Emblyna	acoreensis		Emblyna acoreensis	Wunderlich, 1992	Emblyna acoreensis Wunderlich, 1992	species	END	Borges, P. A.V.	2017
DTP Collection_2891	Palearctic	Portugal	Azores	Terceira	Praia da Vitória	Paul da Praia Vitória	Paul da Praia Vitória- Margins; PPV-T200	38°44’06.44’’N, 27°03’36.21’’W	38.735	-27.06	WGS84	6	10	2017-09-06	Day	Sweeping	sample 01	na	Pimentel, C.		2	2	1	5	Animalia	Arthropoda	Arachnida	Araneae	Dictynidae	Emblyna	acoreensis		Emblyna acoreensis	Wunderlich, 1992	Emblyna acoreensis Wunderlich, 1992	species	END	Borges, P. A.V.	2017
DTP Collection_2892	Palearctic	Portugal	Azores	Terceira	Praia da Vitória	Paul da Praia Vitória	Paul da Praia Vitória- Margins; PPV-T200	38°44’06.44’’N, 27°03’36.21’’W	38.735	-27.06	WGS84	6	10	2017-08-09	Day	Beating	sample 01	Morella faya	Pimentel, C.				1	1	Animalia	Arthropoda	Arachnida	Araneae	Dictynidae	Emblyna	acoreensis		Emblyna acoreensis	Wunderlich, 1992	Emblyna acoreensis Wunderlich, 1992	species	END	Borges, P. A.V.	2017
DTP Collection_2893	Palearctic	Portugal	Azores	Terceira	Praia da Vitória	Paul do Belo Jardim	Paul do Belo Jardim - Margins; PBJ-T203	38°42’47.95’’N, 27°03’40.93’’W	38.7134	-27.0616	WGS84	5	10	2017-08-03	Day	Beating	sample 01	Juncus acutus	Pimentel, C.				2	2	Animalia	Arthropoda	Arachnida	Araneae	Dictynidae	Emblyna	acoreensis		Emblyna acoreensis	Wunderlich, 1992	Emblyna acoreensis Wunderlich, 1992	species	END	Borges, P. A.V.	2017
DTP Collection_2894	Palearctic	Portugal	Azores	Terceira	Praia da Vitória	Paul da Praia Vitória	Paul da Praia Vitória- Margins; PPV-T200	38°44’06.44’’N, 27°03’36.21’’W	38.735	-27.06	WGS84	6	10	2017-08-31	Night	Beating	sample 01	na	Pimentel, C.			1	4	5	Animalia	Arthropoda	Arachnida	Araneae	Dictynidae	Emblyna	acoreensis		Emblyna acoreensis	Wunderlich, 1992	Emblyna acoreensis Wunderlich, 1992	species	END	Borges, P. A.V.	2017
DTP Collection_2895	Palearctic	Portugal	Azores	Terceira	Praia da Vitória	Paul da Pedreira	Paul da Pedreira; PPCP-T202	38°42’13.09’’N; 27°02’46.37’’W	38.7043	-27.0465	WGS84	3	10	2017-06-21	Night	Beating	sample 01	na	Pimentel, C.		1		1	2	Animalia	Arthropoda	Arachnida	Araneae	Dictynidae	Emblyna	acoreensis		Emblyna acoreensis	Wunderlich, 1992	Emblyna acoreensis Wunderlich, 1992	species	END	Borges, P. A.V.	2017
DTP Collection_2896	Palearctic	Portugal	Azores	Terceira	Praia da Vitória	Paul da Pedreira	Paul da Pedreira; PPCP-T202	38°42’13.09’’N; 27°02’46.37’’W	38.7043	-27.0465	WGS84	3	10	2017-06-28	Day	Beating	sample 01	Erica azorica	Pimentel, C.				30	30	Animalia	Arthropoda	Arachnida	Araneae	Dictynidae	Emblyna	acoreensis		Emblyna acoreensis	Wunderlich, 1992	Emblyna acoreensis Wunderlich, 1992	species	END	Borges, P. A.V.	2017
DTP Collection_2897	Palearctic	Portugal	Azores	Terceira	Praia da Vitória	Paul do Belo Jardim	Paul do Belo Jardim - Margins; PBJ-T203	38°42’47.95’’N, 27°03’40.93’’W	38.7134	-27.0616	WGS84	5	10	2017-08-30	Night	Beating	sample 01	na	Borges, P.A.V.			1		1	Animalia	Arthropoda	Arachnida	Araneae	Dictynidae	Emblyna	acoreensis		Emblyna acoreensis	Wunderlich, 1992	Emblyna acoreensis Wunderlich, 1992	species	END	Borges, P. A.V.	2017
DTP Collection_1506	Palearctic	Portugal	Azores	Terceira	Praia da Vitória	Paul da Praia Vitória	Paul da Praia Vitória- Margins; PPV-T200	38°44’06.44’’N, 27°03’36.21’’W	38.735	-27.06	WGS84	6	10	2016-08-30	Day	Beating	sample 06	Arundo donax	Pimentel, C.	1				1	Animalia	Arthropoda	Insecta	Hemiptera	Reduviidae	Empicoris	rubromaculatus		Empicoris rubromaculatus	(Blackburn, 1889)	Empicoris rubromaculatus (Blackburn, 1889)	species	INTR	Borges, P. A.V.	2016
DTP Collection_1507	Palearctic	Portugal	Azores	Terceira	Praia da Vitória	Paul do Belo Jardim	Paul do Belo Jardim - Margins; PBJ-T203	38°42’47.95’’N, 27°03’40.93’’W	38.7134	-27.0616	WGS84	5	10	2016-08-08	Day	Beating	sample 06	Arundo donax	Pimentel, C.	1				1	Animalia	Arthropoda	Insecta	Hemiptera	Reduviidae	Empicoris	rubromaculatus		Empicoris rubromaculatus	(Blackburn, 1889)	Empicoris rubromaculatus (Blackburn, 1889)	species	INTR	Borges, P. A.V.	2016
DTP Collection_1681	Palearctic	Portugal	Azores	Terceira	Praia da Vitória	Paul da Praia Vitória	Paul da Praia Vitória- Margins; PPV-T200	38°44’06.44’’N, 27°03’36.21’’W	38.735	-27.06	WGS84	6	10	2016-08-30	Day	Beating	sample 05	Morella faya	Pimentel, C.	1				1	Animalia	Arthropoda	Insecta	Hemiptera	Reduviidae	Empicoris	rubromaculatus		Empicoris rubromaculatus	(Blackburn, 1889)	Empicoris rubromaculatus (Blackburn, 1889)	species	INTR	Borges, P. A.V.	2016
DTP Collection_1682	Palearctic	Portugal	Azores	Terceira	Praia da Vitória	Paul do Belo Jardim	Paul do Belo Jardim - Margins; PBJ-T203	38°42’47.95’’N, 27°03’40.93’’W	38.7134	-27.0616	WGS84	5	10	2016-08-08	Day	Beating	sample 05	Arundo donax	Pimentel, C.	1				1	Animalia	Arthropoda	Insecta	Hemiptera	Reduviidae	Empicoris	rubromaculatus		Empicoris rubromaculatus	(Blackburn, 1889)	Empicoris rubromaculatus (Blackburn, 1889)	species	INTR	Borges, P. A.V.	2016
DTP Collection_2293	Palearctic	Portugal	Azores	Terceira	Praia da Vitória	Paul da Praia Vitória	Paul da Praia Vitória- Margins; PPV-T200	38°44’06.44’’N, 27°03’36.21’’W	38.735	-27.06	WGS84	6	10	2016-08-30	Day	Beating	sample 03	Morella faya	Pimentel, C.	1				1	Animalia	Arthropoda	Insecta	Hemiptera	Reduviidae	Empicoris	rubromaculatus		Empicoris rubromaculatus	(Blackburn, 1889)	Empicoris rubromaculatus (Blackburn, 1889)	species	INTR	Borges, P. A.V.	2016
DTP Collection_2697	Palearctic	Portugal	Azores	Terceira	Praia da Vitória	Paul do Belo Jardim	Paul do Belo Jardim - Margins; PBJ-T203	38°42’47.95’’N, 27°03’40.93’’W	38.7134	-27.0616	WGS84	5	10	2016-08-08	Day	Beating	sample 02	Arundo donax	Pimentel, C.	1				1	Animalia	Arthropoda	Insecta	Hemiptera	Reduviidae	Empicoris	rubromaculatus		Empicoris rubromaculatus	(Blackburn, 1889)	Empicoris rubromaculatus (Blackburn, 1889)	species	INTR	Borges, P. A.V.	2016
DTP Collection_3091	Palearctic	Portugal	Azores	Terceira	Praia da Vitória	Paul da Pedreira	Paul da Pedreira; PPCP-T202	38°42’13.09’’N; 27°02’46.37’’W	38.7043	-27.0465	WGS84	3	10	2016-08-30	Day	Beating	sample 01	Arundo donax	Pimentel, C.	1				1	Animalia	Arthropoda	Insecta	Hemiptera	Reduviidae	Empicoris	rubromaculatus		Empicoris rubromaculatus	(Blackburn, 1889)	Empicoris rubromaculatus (Blackburn, 1889)	species	INTR	Borges, P. A.V.	2016
DTP Collection_367	Palearctic	Portugal	Azores	Terceira	Praia da Vitória	Paul da Pedreira	Paul da Pedreira; PPCP-T202	38°42’13.09’’N; 27°02’46.37’’W	38.7043	-27.0465	WGS84	3	10	2016-08-30	Day/Night	Pitfall	sample 20	na	Pimentel, C.	1				1	Animalia	Arthropoda	Insecta	Coleoptera	Hydrophilidae	Enochrus	bicolor		Enochrus bicolor	(Fabricius, 1792)	Enochrus bicolor (Fabricius, 1792)	species	INTR	Borges, P. A.V.	2016
DTP Collection_1361	Palearctic	Portugal	Azores	Terceira	Praia da Vitória	Paul da Praia Vitória	Paul da Praia Vitória - Island; PPV-T201	38°44’06.44’’N, 27°03’36.21’’W	38.735	-27.06	WGS84	6	10	2016-08-26	Day/Night	Pitfall	sample 07	na	Pimentel, C.	1				1	Animalia	Arthropoda	Insecta	Coleoptera	Hydrophilidae	Enochrus	bicolor		Enochrus bicolor	(Fabricius, 1792)	Enochrus bicolor (Fabricius, 1792)	species	INTR	Borges, P. A.V.	2016
DTP Collection_1530	Palearctic	Portugal	Azores	Terceira	Praia da Vitória	Paul da Praia Vitória	Paul da Praia Vitória - Island; PPV-T201	38°44’06.44’’N, 27°03’36.21’’W	38.735	-27.06	WGS84	6	10	2016-08-26	Day/Night	Pitfall	sample 06	na	Pimentel, C.	2				2	Animalia	Arthropoda	Insecta	Coleoptera	Hydrophilidae	Enochrus	bicolor		Enochrus bicolor	(Fabricius, 1792)	Enochrus bicolor (Fabricius, 1792)	species	INTR	Borges, P. A.V.	2016
DTP Collection_2347	Palearctic	Portugal	Azores	Terceira	Praia da Vitória	Paul da Praia Vitória	Paul Praia Vitória - Cerrado São Lazaro; PPV-T205	38°44’06.44’’N, 27°03’36.21’’W	38.735	-27.06	WGS84	6	10	2017-08-23	Day/Night	Pitfall	sample 03	na	Pimentel, C.	1				1	Animalia	Arthropoda	Insecta	Coleoptera	Hydrophilidae	Enochrus	bicolor		Enochrus bicolor	(Fabricius, 1792)	Enochrus bicolor (Fabricius, 1792)	species	INTR	Borges, P. A.V.	2017
DTP Collection_3159	Palearctic	Portugal	Azores	Terceira	Praia da Vitória	Paul da Praia Vitória	Paul da Praia Vitória - Island; PPV-T201	38°44’06.44’’N, 27°03’36.21’’W	38.735	-27.06	WGS84	6	10	2016-08-26	Day/Night	Pitfall	sample 01	na	Pimentel, C.	1				1	Animalia	Arthropoda	Insecta	Coleoptera	Hydrophilidae	Enochrus	bicolor		Enochrus bicolor	(Fabricius, 1792)	Enochrus bicolor (Fabricius, 1792)	species	INTR	Borges, P. A.V.	2016
DTP Collection_769	Palearctic	Portugal	Azores	Terceira	Praia da Vitória	Paul do Belo Jardim	Paul do Belo Jardim - Margins; PBJ-T203	38°42’47.95’’N, 27°03’40.93’’W	38.7134	-27.0616	WGS84	5	10	2017-08-03	Day	Beating	sample 10	Arundo donax	Pimentel, C.			1		1	Animalia	Arthropoda	Arachnida	Araneae	Linyphiidae	Entelecara	schmitzi		Entelecara schmitzi	Kulczynski, 1905	Entelecara schmitzi Kulczynski, 1905	species	INTR	Borges, P. A.V.	2017
DTP Collection_770	Palearctic	Portugal	Azores	Terceira	Praia da Vitória	Paul da Pedreira	Paul da Pedreira; PPCP-T202	38°42’13.09’’N; 27°02’46.37’’W	38.7043	-27.0465	WGS84	3	10	2017-06-28	Day	Beating	sample 10	Morella faya	Pimentel, C.			4		4	Animalia	Arthropoda	Arachnida	Araneae	Linyphiidae	Entelecara	schmitzi		Entelecara schmitzi	Kulczynski, 1905	Entelecara schmitzi Kulczynski, 1905	species	INTR	Borges, P. A.V.	2017
DTP Collection_1431	Palearctic	Portugal	Azores	Terceira	Praia da Vitória	Paul do Belo Jardim	Paul do Belo Jardim - Margins; PBJ-T203	38°42’47.95’’N, 27°03’40.93’’W	38.7134	-27.0616	WGS84	5	10	2016-08-08	Day	Beating	sample 06	Arundo donax	Pimentel, C.		1	2	5	8	Animalia	Arthropoda	Arachnida	Araneae	Linyphiidae	Entelecara	schmitzi		Entelecara schmitzi	Kulczynski, 1905	Entelecara schmitzi Kulczynski, 1905	species	INTR	Borges, P. A.V.	2016
DTP Collection_1607	Palearctic	Portugal	Azores	Terceira	Praia da Vitória	Paul da Pedreira	Paul da Pedreira; PPCP-T202	38°42’13.09’’N; 27°02’46.37’’W	38.7043	-27.0465	WGS84	3	10	2017-06-28	Day	Beating	sample 05	Arundo donax	Pimentel, C.			1		1	Animalia	Arthropoda	Arachnida	Araneae	Linyphiidae	Entelecara	schmitzi		Entelecara schmitzi	Kulczynski, 1905	Entelecara schmitzi Kulczynski, 1905	species	INTR	Borges, P. A.V.	2017
DTP Collection_1814	Palearctic	Portugal	Azores	Terceira	Praia da Vitória	Paul da Pedreira	Paul da Pedreira; PPCP-T202	38°42’13.09’’N; 27°02’46.37’’W	38.7043	-27.0465	WGS84	3	10	2017-06-21	Night	Active aerial searching	sample 04	na	Gabriel, R.			1		1	Animalia	Arthropoda	Arachnida	Araneae	Linyphiidae	Entelecara	schmitzi		Entelecara schmitzi	Kulczynski, 1905	Entelecara schmitzi Kulczynski, 1905	species	INTR	Borges, P. A.V.	2017
DTP Collection_2489	Palearctic	Portugal	Azores	Terceira	Praia da Vitória	Paul da Praia Vitória	Paul da Praia Vitória- Margins; PPV-T200	38°44’06.44’’N, 27°03’36.21’’W	38.735	-27.06	WGS84	6	10	2017-08-31	Night	Beating	sample 02	na	Borges, P.A.V.		1			1	Animalia	Arthropoda	Arachnida	Araneae	Linyphiidae	Entelecara	schmitzi		Entelecara schmitzi	Kulczynski, 1905	Entelecara schmitzi Kulczynski, 1905	species	INTR	Borges, P. A.V.	2017
DTP Collection_2909	Palearctic	Portugal	Azores	Terceira	Praia da Vitória	Paul da Pedreira	Paul da Pedreira; PPCP-T202	38°42’13.09’’N; 27°02’46.37’’W	38.7043	-27.0465	WGS84	3	10	2017-06-21	Night	Beating	sample 01	na	Pimentel, C.			1		1	Animalia	Arthropoda	Arachnida	Araneae	Linyphiidae	Entelecara	schmitzi		Entelecara schmitzi	Kulczynski, 1905	Entelecara schmitzi Kulczynski, 1905	species	INTR	Borges, P. A.V.	2017
DTP Collection_852	Palearctic	Portugal	Azores	Terceira	Praia da Vitória	Paul do Belo Jardim	Paul do Belo Jardim - Margins; PBJ-T203	38°42’47.95’’N, 27°03’40.93’’W	38.7134	-27.0616	WGS84	5	10	2016-08-08	Day	Beating	sample 10	Arundo donax	Pimentel, C.	1				1	Animalia	Arthropoda	Insecta	Coleoptera	Chrysomelidae	Epitrix	hirtipennis		Epitrix hirtipennis	Melsham, 1847	Epitrix hirtipennis Melsham, 1847	species	INTR	Borges, P. A.V.	2016
DTP Collection_1513	Palearctic	Portugal	Azores	Terceira	Praia da Vitória	Paul do Belo Jardim	Paul do Belo Jardim - Margins; PBJ-T203	38°42’47.95’’N, 27°03’40.93’’W	38.7134	-27.0616	WGS84	5	10	2016-08-08	Day	Beating	sample 06	Juncus acutus	Pimentel, C.	1				1	Animalia	Arthropoda	Insecta	Coleoptera	Chrysomelidae	Epitrix	hirtipennis		Epitrix hirtipennis	Melsham, 1847	Epitrix hirtipennis Melsham, 1847	species	INTR	Borges, P. A.V.	2016
DTP Collection_205	Palearctic	Portugal	Azores	Terceira	Praia da Vitória	Paul da Praia Vitória	Paul da Praia Vitória- Margins; PPV-T200	38°44’06.44’’N, 27°03’36.21’’W	38.735	-27.06	WGS84	6	10	2017-08-23	Day/Night	Pitfall	sample 25	na	Pimentel, C.		1			1	Animalia	Arthropoda	Arachnida	Araneae	Linyphiidae	Erigone	autumnalis		Erigone autumnalis	Emerton, 1882	Erigone autumnalis Emerton, 1882	species	INTR	Borges, P. A.V.	2017
DTP Collection_382	Palearctic	Portugal	Azores	Terceira	Praia da Vitória	Paul do Belo Jardim	Paul do Belo Jardim - Margins; PBJ-T203	38°42’47.95’’N, 27°03’40.93’’W	38.7134	-27.0616	WGS84	5	10	2016-09-07	Day/Night	Pitfall	sample 19	na	Pimentel, C.		1			1	Animalia	Arthropoda	Arachnida	Araneae	Linyphiidae	Erigone	autumnalis		Erigone autumnalis	Emerton, 1882	Erigone autumnalis Emerton, 1882	species	INTR	Borges, P. A.V.	2016
DTP Collection_507	Palearctic	Portugal	Azores	Terceira	Praia da Vitória	Paul do Belo Jardim	Paul do Belo Jardim - Margins; PBJ-T203	38°42’47.95’’N, 27°03’40.93’’W	38.7134	-27.0616	WGS84	5	10	2017-08-16	Day/Night	Pitfall	sample 15	na	Pimentel, C.		1			1	Animalia	Arthropoda	Arachnida	Araneae	Linyphiidae	Erigone	autumnalis		Erigone autumnalis	Emerton, 1882	Erigone autumnalis Emerton, 1882	species	INTR	Borges, P. A.V.	2017
DTP Collection_552	Palearctic	Portugal	Azores	Terceira	Praia da Vitória	Paul do Belo Jardim	Paul do Belo Jardim - Stream; PBJ-T204	38°42’47.95’’N, 27°03’40.93’’W	38.7134	-27.0616	WGS84	5	10	2016-09-07	Day/Night	Pitfall	sample 14	na	Pimentel, C.			1		1	Animalia	Arthropoda	Arachnida	Araneae	Linyphiidae	Erigone	autumnalis		Erigone autumnalis	Emerton, 1882	Erigone autumnalis Emerton, 1882	species	INTR	Borges, P. A.V.	2016
DTP Collection_771	Palearctic	Portugal	Azores	Terceira	Praia da Vitória	Paul do Belo Jardim	Paul do Belo Jardim - Margins; PBJ-T203	38°42’47.95’’N, 27°03’40.93’’W	38.7134	-27.0616	WGS84	5	10	2017-08-03	Day	Beating	sample 10	Juncus acutus	Pimentel, C.				1	1	Animalia	Arthropoda	Arachnida	Araneae	Linyphiidae	Erigone	autumnalis		Erigone autumnalis	Emerton, 1882	Erigone autumnalis Emerton, 1882	species	INTR	Borges, P. A.V.	2017
DTP Collection_772	Palearctic	Portugal	Azores	Terceira	Praia da Vitória	Paul do Belo Jardim	Paul do Belo Jardim - Stream; PBJ-T204	38°42’47.95’’N, 27°03’40.93’’W	38.7134	-27.0616	WGS84	5	10	2017-08-16	Day/Night	Pitfall	sample 10	na	Pimentel, C.		1			1	Animalia	Arthropoda	Arachnida	Araneae	Linyphiidae	Erigone	autumnalis		Erigone autumnalis	Emerton, 1882	Erigone autumnalis Emerton, 1882	species	INTR	Borges, P. A.V.	2017
DTP Collection_948	Palearctic	Portugal	Azores	Terceira	Praia da Vitória	Paul do Belo Jardim	Paul do Belo Jardim - Margins; PBJ-T203	38°42’47.95’’N, 27°03’40.93’’W	38.7134	-27.0616	WGS84	5	10	2016-09-07	Day/Night	Pitfall	sample 09	na	Pimentel, C.		1			1	Animalia	Arthropoda	Arachnida	Araneae	Linyphiidae	Erigone	autumnalis		Erigone autumnalis	Emerton, 1882	Erigone autumnalis Emerton, 1882	species	INTR	Borges, P. A.V.	2016
DTP Collection_949	Palearctic	Portugal	Azores	Terceira	Praia da Vitória	Paul do Belo Jardim	Paul do Belo Jardim - Stream; PBJ-T204	38°42’47.95’’N, 27°03’40.93’’W	38.7134	-27.0616	WGS84	5	10	2016-09-07	Day/Night	Pitfall	sample 09	na	Pimentel, C.		1			1	Animalia	Arthropoda	Arachnida	Araneae	Linyphiidae	Erigone	autumnalis		Erigone autumnalis	Emerton, 1882	Erigone autumnalis Emerton, 1882	species	INTR	Borges, P. A.V.	2016
DTP Collection_1273	Palearctic	Portugal	Azores	Terceira	Praia da Vitória	Paul do Belo Jardim	Paul do Belo Jardim - Margins; PBJ-T203	38°42’47.95’’N, 27°03’40.93’’W	38.7134	-27.0616	WGS84	5	10	2016-09-07	Day/Night	Pitfall	sample 07	na	Pimentel, C.		1			1	Animalia	Arthropoda	Arachnida	Araneae	Linyphiidae	Erigone	autumnalis		Erigone autumnalis	Emerton, 1882	Erigone autumnalis Emerton, 1882	species	INTR	Borges, P. A.V.	2016
DTP Collection_1608	Palearctic	Portugal	Azores	Terceira	Praia da Vitória	Paul da Praia Vitória	Paul da Praia Vitória- Margins; PPV-T200	38°44’06.44’’N, 27°03’36.21’’W	38.735	-27.06	WGS84	6	10	2016-08-26	Day/Night	Pitfall	sample 05	na	Pimentel, C.			1		1	Animalia	Arthropoda	Arachnida	Araneae	Linyphiidae	Erigone	autumnalis		Erigone autumnalis	Emerton, 1882	Erigone autumnalis Emerton, 1882	species	INTR	Borges, P. A.V.	2016
DTP Collection_2150	Palearctic	Portugal	Azores	Terceira	Praia da Vitória	Paul da Praia Vitória	Paul da Praia Vitória- Margins; PPV-T200	38°44’06.44’’N, 27°03’36.21’’W	38.735	-27.06	WGS84	6	10	2016-08-26	Day/Night	Pitfall	sample 03	na	Pimentel, C.		1			1	Animalia	Arthropoda	Arachnida	Araneae	Linyphiidae	Erigone	autumnalis		Erigone autumnalis	Emerton, 1882	Erigone autumnalis Emerton, 1882	species	INTR	Borges, P. A.V.	2016
DTP Collection_2490	Palearctic	Portugal	Azores	Terceira	Praia da Vitória	Paul da Praia Vitória	Paul da Praia Vitória - Island; PPV-T201	38°44’06.44’’N, 27°03’36.21’’W	38.735	-27.06	WGS84	6	10	2016-08-26	Day/Night	Pitfall	sample 02	na	Pimentel, C.		1			1	Animalia	Arthropoda	Arachnida	Araneae	Linyphiidae	Erigone	autumnalis		Erigone autumnalis	Emerton, 1882	Erigone autumnalis Emerton, 1882	species	INTR	Borges, P. A.V.	2016
DTP Collection_2910	Palearctic	Portugal	Azores	Terceira	Praia da Vitória	Paul do Belo Jardim	Paul do Belo Jardim - Margins; PBJ-T203	38°42’47.95’’N, 27°03’40.93’’W	38.7134	-27.0616	WGS84	5	10	2016-09-07	Day/Night	Pitfall	sample 01	na	Pimentel, C.		1			1	Animalia	Arthropoda	Arachnida	Araneae	Linyphiidae	Erigone	autumnalis		Erigone autumnalis	Emerton, 1882	Erigone autumnalis Emerton, 1882	species	INTR	Borges, P. A.V.	2016
DTP Collection_2911	Palearctic	Portugal	Azores	Terceira	Praia da Vitória	Paul da Praia Vitória	Paul da Praia Vitória - Island; PPV-T201	38°44’06.44’’N, 27°03’36.21’’W	38.735	-27.06	WGS84	6	10	2017-08-23	Day/Night	Pitfall	sample 01	na	Pimentel, C.		1			1	Animalia	Arthropoda	Arachnida	Araneae	Linyphiidae	Erigone	autumnalis		Erigone autumnalis	Emerton, 1882	Erigone autumnalis Emerton, 1882	species	INTR	Borges, P. A.V.	2017
DTP Collection_137	Palearctic	Portugal	Azores	Terceira	Praia da Vitória	Paul da Pedreira	Paul da Pedreira; PPCP-T202	38°42’13.09’’N; 27°02’46.37’’W	38.7043	-27.0465	WGS84	3	10	2016-08-30	Day/Night	Pitfall	sample 27	na	Pimentel, C.		1			1	Animalia	Arthropoda	Arachnida	Araneae	Linyphiidae	Erigone	dentipalpis		Erigone dentipalpis	(Wider, 1834)	Erigone dentipalpis (Wider, 1834)	species	INTR	Borges, P. A.V.	2016
DTP Collection_477	Palearctic	Portugal	Azores	Terceira	Praia da Vitória	Paul da Pedreira	Paul da Pedreira; PPCP-T202	38°42’13.09’’N; 27°02’46.37’’W	38.7043	-27.0465	WGS84	3	10	2016-08-30	Day/Night	Pitfall	sample 16	na	Pimentel, C.			1		1	Animalia	Arthropoda	Arachnida	Araneae	Linyphiidae	Erigone	dentipalpis		Erigone dentipalpis	(Wider, 1834)	Erigone dentipalpis (Wider, 1834)	species	INTR	Borges, P. A.V.	2016
DTP Collection_635	Palearctic	Portugal	Azores	Terceira	Praia da Vitória	Paul da Praia Vitória	Paul da Praia Vitória - Island; PPV-T201	38°44’06.44’’N, 27°03’36.21’’W	38.735	-27.06	WGS84	6	10	2017-08-23	Day/Night	Pitfall	sample 12	na	Pimentel, C.		1			1	Animalia	Arthropoda	Arachnida	Araneae	Linyphiidae	Erigone	dentipalpis		Erigone dentipalpis	(Wider, 1834)	Erigone dentipalpis (Wider, 1834)	species	INTR	Borges, P. A.V.	2017
DTP Collection_773	Palearctic	Portugal	Azores	Terceira	Praia da Vitória	Paul do Belo Jardim	Paul do Belo Jardim - Margins; PBJ-T203	38°42’47.95’’N, 27°03’40.93’’W	38.7134	-27.0616	WGS84	5	10	2017-08-03	Day	Beating	sample 10	Arundo donax	Pimentel, C.		1	1		2	Animalia	Arthropoda	Arachnida	Araneae	Linyphiidae	Erigone	dentipalpis		Erigone dentipalpis	(Wider, 1834)	Erigone dentipalpis (Wider, 1834)	species	INTR	Borges, P. A.V.	2017
DTP Collection_1128	Palearctic	Portugal	Azores	Terceira	Praia da Vitória	Paul do Belo Jardim	Paul do Belo Jardim - Margins; PBJ-T203	38°42’47.95’’N, 27°03’40.93’’W	38.7134	-27.0616	WGS84	5	10	2016-08-08	Day	Beating	sample 08	Juncus acutus	Pimentel, C.			1	1	2	Animalia	Arthropoda	Arachnida	Araneae	Linyphiidae	Erigone	dentipalpis		Erigone dentipalpis	(Wider, 1834)	Erigone dentipalpis (Wider, 1834)	species	INTR	Borges, P. A.V.	2016
DTP Collection_1815	Palearctic	Portugal	Azores	Terceira	Praia da Vitória	Paul da Praia Vitória	Paul da Praia Vitória- Margins; PPV-T200	38°44’06.44’’N, 27°03’36.21’’W	38.735	-27.06	WGS84	6	10	2017-08-23	Day/Night	Pitfall	sample 04	na	Pimentel, C.		1			1	Animalia	Arthropoda	Arachnida	Araneae	Linyphiidae	Erigone	dentipalpis		Erigone dentipalpis	(Wider, 1834)	Erigone dentipalpis (Wider, 1834)	species	INTR	Borges, P. A.V.	2017
DTP Collection_2151	Palearctic	Portugal	Azores	Terceira	Praia da Vitória	Paul da Pedreira	Paul da Pedreira; PPCP-T202	38°42’13.09’’N; 27°02’46.37’’W	38.7043	-27.0465	WGS84	3	10	2016-08-30	Day/Night	Pitfall	sample 03	na	Pimentel, C.		1			1	Animalia	Arthropoda	Arachnida	Araneae	Linyphiidae	Erigone	dentipalpis		Erigone dentipalpis	(Wider, 1834)	Erigone dentipalpis (Wider, 1834)	species	INTR	Borges, P. A.V.	2016
DTP Collection_2491	Palearctic	Portugal	Azores	Terceira	Praia da Vitória	Paul da Pedreira	Paul da Pedreira; PPCP-T202	38°42’13.09’’N; 27°02’46.37’’W	38.7043	-27.0465	WGS84	3	10	2017-07-04	Day	Sweeping	sample 02	na	Pimentel, C.				2	2	Animalia	Arthropoda	Arachnida	Araneae	Linyphiidae	Erigone	dentipalpis		Erigone dentipalpis	(Wider, 1834)	Erigone dentipalpis (Wider, 1834)	species	INTR	Borges, P. A.V.	2017
DTP Collection_2492	Palearctic	Portugal	Azores	Terceira	Praia da Vitória	Paul da Pedreira	Paul da Pedreira; PPCP-T202	38°42’13.09’’N; 27°02’46.37’’W	38.7043	-27.0465	WGS84	3	10	2017-06-21	Night	Beating	sample 02	na	Borges, P.A.V.		1			1	Animalia	Arthropoda	Arachnida	Araneae	Linyphiidae	Erigone	dentipalpis		Erigone dentipalpis	(Wider, 1834)	Erigone dentipalpis (Wider, 1834)	species	INTR	Borges, P. A.V.	2017
DTP Collection_2493	Palearctic	Portugal	Azores	Terceira	Praia da Vitória	Paul da Praia Vitória	Paul da Praia Vitória- Margins; PPV-T200	38°44’06.44’’N, 27°03’36.21’’W	38.735	-27.06	WGS84	6	10	2017-08-23	Day/Night	Pitfall	sample 02	na	Pimentel, C.		1			1	Animalia	Arthropoda	Arachnida	Araneae	Linyphiidae	Erigone	dentipalpis		Erigone dentipalpis	(Wider, 1834)	Erigone dentipalpis (Wider, 1834)	species	INTR	Borges, P. A.V.	2017
DTP Collection_2912	Palearctic	Portugal	Azores	Terceira	Praia da Vitória	Paul do Belo Jardim	Paul do Belo Jardim - Margins; PBJ-T203	38°42’47.95’’N, 27°03’40.93’’W	38.7134	-27.0616	WGS84	5	10	2016-09-15	Day	Sweeping	sample 01	na	Goulart, S. & Pimentel, C.		1	1		2	Animalia	Arthropoda	Arachnida	Araneae	Linyphiidae	Erigone	dentipalpis		Erigone dentipalpis	(Wider, 1834)	Erigone dentipalpis (Wider, 1834)	species	INTR	Borges, P. A.V.	2016
DTP Collection_2913	Palearctic	Portugal	Azores	Terceira	Praia da Vitória	Paul da Pedreira	Paul da Pedreira; PPCP-T202	38°42’13.09’’N; 27°02’46.37’’W	38.7043	-27.0465	WGS84	3	10	2017-06-29	Day	Sweeping	sample 01	na	Pimentel, C.		1	1		2	Animalia	Arthropoda	Arachnida	Araneae	Linyphiidae	Erigone	dentipalpis		Erigone dentipalpis	(Wider, 1834)	Erigone dentipalpis (Wider, 1834)	species	INTR	Borges, P. A.V.	2017
DTP Collection_2914	Palearctic	Portugal	Azores	Terceira	Praia da Vitória	Paul da Pedreira	Paul da Pedreira; PPCP-T202	38°42’13.09’’N; 27°02’46.37’’W	38.7043	-27.0465	WGS84	3	10	2017-06-30	Day/Night	Pitfall	sample 01	na	Pimentel, C.		1			1	Animalia	Arthropoda	Arachnida	Araneae	Linyphiidae	Erigone	dentipalpis		Erigone dentipalpis	(Wider, 1834)	Erigone dentipalpis (Wider, 1834)	species	INTR	Borges, P. A.V.	2017
DTP Collection_2512	Palearctic	Portugal	Azores	Terceira	Praia da Vitória	Paul da Pedreira	Paul da Pedreira; PPCP-T202	38°42’13.09’’N; 27°02’46.37’’W	38.7043	-27.0465	WGS84	3	10	2017-06-21	Night	Beating	sample 02	na	Borges, P.A.V.		1			1	Animalia	Arthropoda	Arachnida	Araneae	Mimetidae	Ero	aphana		Ero aphana	(Walckenaer, 1802)	Ero aphana (Walckenaer, 1802)	species	INTR	Crespo, L.	2017
DTP Collection_1442	Palearctic	Portugal	Azores	Terceira	Praia da Vitória	Paul do Belo Jardim	Paul do Belo Jardim - Margins; PBJ-T203	38°42’47.95’’N, 27°03’40.93’’W	38.7134	-27.0616	WGS84	5	10	2016-08-08	Day	Beating	sample 06	Arundo donax	Pimentel, C.				1	1	Animalia	Arthropoda	Arachnida	Araneae	Mimetidae	Ero	furcata		Ero furcata	(Villers, 1789)	Ero furcata (Villers, 1789)	species	INTR	Borges, P. A.V.	2016
DTP Collection_1618	Palearctic	Portugal	Azores	Terceira	Praia da Vitória	Paul do Belo Jardim	Paul do Belo Jardim - Margins; PBJ-T203	38°42’47.95’’N, 27°03’40.93’’W	38.7134	-27.0616	WGS84	5	10	2016-08-08	Day	Beating	sample 05	Arundo donax	Pimentel, C.				2	2	Animalia	Arthropoda	Arachnida	Araneae	Mimetidae	Ero	furcata		Ero furcata	(Villers, 1789)	Ero furcata (Villers, 1789)	species	INTR	Borges, P. A.V.	2016
DTP Collection_1825	Palearctic	Portugal	Azores	Terceira	Praia da Vitória	Paul do Belo Jardim	Paul do Belo Jardim - Margins; PBJ-T203	38°42’47.95’’N, 27°03’40.93’’W	38.7134	-27.0616	WGS84	5	10	2016-08-31	Night	Active aerial searching	sample 04	na	Gabriel, R.		1			1	Animalia	Arthropoda	Arachnida	Araneae	Mimetidae	Ero	furcata		Ero furcata	(Villers, 1789)	Ero furcata (Villers, 1789)	species	INTR	Borges, P. A.V.	2016
DTP Collection_2163	Palearctic	Portugal	Azores	Terceira	Praia da Vitória	Paul do Belo Jardim	Paul do Belo Jardim - Margins; PBJ-T203	38°42’47.95’’N, 27°03’40.93’’W	38.7134	-27.0616	WGS84	5	10	2017-08-30	Night	Active aerial searching	sample 03	na	Borges, P.A.V.				1	1	Animalia	Arthropoda	Arachnida	Araneae	Mimetidae	Ero	furcata		Ero furcata	(Villers, 1789)	Ero furcata (Villers, 1789)	species	INTR	Borges, P. A.V.	2017
DTP Collection_2164	Palearctic	Portugal	Azores	Terceira	Praia da Vitória	Paul do Belo Jardim	Paul do Belo Jardim - Margins; PBJ-T203	38°42’47.95’’N, 27°03’40.93’’W	38.7134	-27.0616	WGS84	5	10	2017-08-16	Day/Night	Pitfall	sample 03	na	Pimentel, C.				1	1	Animalia	Arthropoda	Arachnida	Araneae	Mimetidae	Ero	furcata		Ero furcata	(Villers, 1789)	Ero furcata (Villers, 1789)	species	INTR	Borges, P. A.V.	2017
DTP Collection_2513	Palearctic	Portugal	Azores	Terceira	Praia da Vitória	Paul da Praia Vitória	Paul da Praia Vitória- Margins; PPV-T200	38°44’06.44’’N, 27°03’36.21’’W	38.735	-27.06	WGS84	6	10	2016-09-01	Night	Active aerial searching	sample 02	na	Borges, P.A.V.				1	1	Animalia	Arthropoda	Arachnida	Araneae	Mimetidae	Ero	furcata		Ero furcata	(Villers, 1789)	Ero furcata (Villers, 1789)	species	INTR	Borges, P. A.V.	2016
DTP Collection_7	Palearctic	Portugal	Azores	Terceira	Praia da Vitória	Paul do Belo Jardim	Paul do Belo Jardim - Margins; PBJ-T203	38°42’47.95’’N, 27°03’40.93’’W	38.7134	-27.0616	WGS84	5	10	2017-08-16	Day/Night	Pitfall	sample_ADD3	na	Pimentel, C.	2				2	Animalia	Arthropoda	Insecta	Dermaptera	Anisolabididae	Euborellia	annulipes		Euborellia annulipes	(Lucas, 1847)	Euborellia annulipes (Lucas, 1847)	species	INTR	Borges, P. A.V.	2017
DTP Collection_17	Palearctic	Portugal	Azores	Terceira	Praia da Vitória	Paul do Belo Jardim	Paul do Belo Jardim - Margins; PBJ-T203	38°42’47.95’’N, 27°03’40.93’’W	38.7134	-27.0616	WGS84	5	10	2017-08-16	Day/Night	Pitfall	sample_ADD2	na	Pimentel, C.				2	2	Animalia	Arthropoda	Insecta	Dermaptera	Anisolabididae	Euborellia	annulipes		Euborellia annulipes	(Lucas, 1847)	Euborellia annulipes (Lucas, 1847)	species	INTR	Borges, P. A.V.	2017
DTP Collection_30	Palearctic	Portugal	Azores	Terceira	Praia da Vitória	Paul da Praia Vitória	Paul Praia Vitória - Cerrado São Lazaro; PPV-T205	38°44’06.44’’N, 27°03’36.21’’W	38.735	-27.06	WGS84	6	10	2017-08-23	Day/Night	Pitfall	sample_ADD	na	Pimentel, C.	1			2	3	Animalia	Arthropoda	Insecta	Dermaptera	Anisolabididae	Euborellia	annulipes		Euborellia annulipes	(Lucas, 1847)	Euborellia annulipes (Lucas, 1847)	species	INTR	Borges, P. A.V.	2017
DTP Collection_49	Palearctic	Portugal	Azores	Terceira	Praia da Vitória	Paul do Belo Jardim	Paul do Belo Jardim - Margins; PBJ-T203	38°42’47.95’’N, 27°03’40.93’’W	38.7134	-27.0616	WGS84	5	10	2016-09-07	Day/Night	Pitfall	sample 30	na	Pimentel, C.				1	1	Animalia	Arthropoda	Insecta	Dermaptera	Anisolabididae	Euborellia	annulipes		Euborellia annulipes	(Lucas, 1847)	Euborellia annulipes (Lucas, 1847)	species	INTR	Borges, P. A.V.	2016
DTP Collection_50	Palearctic	Portugal	Azores	Terceira	Praia da Vitória	Paul do Belo Jardim	Paul do Belo Jardim - Margins; PBJ-T203	38°42’47.95’’N, 27°03’40.93’’W	38.7134	-27.0616	WGS84	5	10	2017-08-16	Day/Night	Pitfall	sample 30	na	Pimentel, C.	3				3	Animalia	Arthropoda	Insecta	Dermaptera	Anisolabididae	Euborellia	annulipes		Euborellia annulipes	(Lucas, 1847)	Euborellia annulipes (Lucas, 1847)	species	INTR	Borges, P. A.V.	2017
DTP Collection_85	Palearctic	Portugal	Azores	Terceira	Praia da Vitória	Paul da Pedreira	Paul da Pedreira; PPCP-T202	38°42’13.09’’N; 27°02’46.37’’W	38.7043	-27.0465	WGS84	3	10	2016-08-30	Day/Night	Pitfall	sample 29	na	Pimentel, C.				2	2	Animalia	Arthropoda	Insecta	Dermaptera	Anisolabididae	Euborellia	annulipes		Euborellia annulipes	(Lucas, 1847)	Euborellia annulipes (Lucas, 1847)	species	INTR	Borges, P. A.V.	2016
DTP Collection_86	Palearctic	Portugal	Azores	Terceira	Praia da Vitória	Paul do Belo Jardim	Paul do Belo Jardim - Margins; PBJ-T203	38°42’47.95’’N, 27°03’40.93’’W	38.7134	-27.0616	WGS84	5	10	2016-09-07	Day/Night	Pitfall	sample 29	na	Pimentel, C.				1	1	Animalia	Arthropoda	Insecta	Dermaptera	Anisolabididae	Euborellia	annulipes		Euborellia annulipes	(Lucas, 1847)	Euborellia annulipes (Lucas, 1847)	species	INTR	Borges, P. A.V.	2016
DTP Collection_87	Palearctic	Portugal	Azores	Terceira	Praia da Vitória	Paul da Praia Vitória	Paul da Praia Vitória- Margins; PPV-T200	38°44’06.44’’N, 27°03’36.21’’W	38.735	-27.06	WGS84	6	10	2017-08-23	Day/Night	Pitfall	sample 29	na	Pimentel, C.				8	8	Animalia	Arthropoda	Insecta	Dermaptera	Anisolabididae	Euborellia	annulipes		Euborellia annulipes	(Lucas, 1847)	Euborellia annulipes (Lucas, 1847)	species	INTR	Borges, P. A.V.	2017
DTP Collection_88	Palearctic	Portugal	Azores	Terceira	Praia da Vitória	Paul do Belo Jardim	Paul do Belo Jardim - Margins; PBJ-T203	38°42’47.95’’N, 27°03’40.93’’W	38.7134	-27.0616	WGS84	5	10	2017-08-16	Day/Night	Pitfall	sample 29	na	Pimentel, C.	2			3	5	Animalia	Arthropoda	Insecta	Dermaptera	Anisolabididae	Euborellia	annulipes		Euborellia annulipes	(Lucas, 1847)	Euborellia annulipes (Lucas, 1847)	species	INTR	Borges, P. A.V.	2017
DTP Collection_116	Palearctic	Portugal	Azores	Terceira	Praia da Vitória	Paul da Pedreira	Paul da Pedreira; PPCP-T202	38°42’13.09’’N; 27°02’46.37’’W	38.7043	-27.0465	WGS84	3	10	2016-08-30	Day/Night	Pitfall	sample 28	na	Pimentel, C.				2	2	Animalia	Arthropoda	Insecta	Dermaptera	Anisolabididae	Euborellia	annulipes		Euborellia annulipes	(Lucas, 1847)	Euborellia annulipes (Lucas, 1847)	species	INTR	Borges, P. A.V.	2016
DTP Collection_117	Palearctic	Portugal	Azores	Terceira	Praia da Vitória	Paul do Belo Jardim	Paul do Belo Jardim - Margins; PBJ-T203	38°42’47.95’’N, 27°03’40.93’’W	38.7134	-27.0616	WGS84	5	10	2016-09-07	Day/Night	Pitfall	sample 28	na	Pimentel, C.	2				2	Animalia	Arthropoda	Insecta	Dermaptera	Anisolabididae	Euborellia	annulipes		Euborellia annulipes	(Lucas, 1847)	Euborellia annulipes (Lucas, 1847)	species	INTR	Borges, P. A.V.	2016
DTP Collection_118	Palearctic	Portugal	Azores	Terceira	Praia da Vitória	Paul da Praia Vitória	Paul da Praia Vitória- Margins; PPV-T200	38°44’06.44’’N, 27°03’36.21’’W	38.735	-27.06	WGS84	6	10	2017-08-23	Day/Night	Pitfall	sample 28	na	Pimentel, C.	1				1	Animalia	Arthropoda	Insecta	Dermaptera	Anisolabididae	Euborellia	annulipes		Euborellia annulipes	(Lucas, 1847)	Euborellia annulipes (Lucas, 1847)	species	INTR	Borges, P. A.V.	2017
DTP Collection_119	Palearctic	Portugal	Azores	Terceira	Praia da Vitória	Paul do Belo Jardim	Paul do Belo Jardim - Margins; PBJ-T203	38°42’47.95’’N, 27°03’40.93’’W	38.7134	-27.0616	WGS84	5	10	2017-08-16	Day/Night	Pitfall	sample 28	na	Pimentel, C.	1				1	Animalia	Arthropoda	Insecta	Dermaptera	Anisolabididae	Euborellia	annulipes		Euborellia annulipes	(Lucas, 1847)	Euborellia annulipes (Lucas, 1847)	species	INTR	Borges, P. A.V.	2017
DTP Collection_147	Palearctic	Portugal	Azores	Terceira	Praia da Vitória	Paul da Pedreira	Paul da Pedreira; PPCP-T202	38°42’13.09’’N; 27°02’46.37’’W	38.7043	-27.0465	WGS84	3	10	2016-08-30	Day/Night	Pitfall	sample 27	na	Pimentel, C.			1		1	Animalia	Arthropoda	Insecta	Dermaptera	Anisolabididae	Euborellia	annulipes		Euborellia annulipes	(Lucas, 1847)	Euborellia annulipes (Lucas, 1847)	species	INTR	Borges, P. A.V.	2016
DTP Collection_178	Palearctic	Portugal	Azores	Terceira	Praia da Vitória	Paul do Belo Jardim	Paul do Belo Jardim - Margins; PBJ-T203	38°42’47.95’’N, 27°03’40.93’’W	38.7134	-27.0616	WGS84	5	10	2016-09-07	Day/Night	Pitfall	sample 26	na	Pimentel, C.				1	1	Animalia	Arthropoda	Insecta	Dermaptera	Anisolabididae	Euborellia	annulipes		Euborellia annulipes	(Lucas, 1847)	Euborellia annulipes (Lucas, 1847)	species	INTR	Borges, P. A.V.	2016
DTP Collection_179	Palearctic	Portugal	Azores	Terceira	Praia da Vitória	Paul da Praia Vitória	Paul da Praia Vitória- Margins; PPV-T200	38°44’06.44’’N, 27°03’36.21’’W	38.735	-27.06	WGS84	6	10	2017-08-23	Day/Night	Pitfall	sample 26	na	Pimentel, C.				2	2	Animalia	Arthropoda	Insecta	Dermaptera	Anisolabididae	Euborellia	annulipes		Euborellia annulipes	(Lucas, 1847)	Euborellia annulipes (Lucas, 1847)	species	INTR	Borges, P. A.V.	2017
DTP Collection_211	Palearctic	Portugal	Azores	Terceira	Praia da Vitória	Paul da Pedreira	Paul da Pedreira; PPCP-T202	38°42’13.09’’N; 27°02’46.37’’W	38.7043	-27.0465	WGS84	3	10	2016-08-30	Day/Night	Pitfall	sample 25	na	Pimentel, C.		1	1	5	7	Animalia	Arthropoda	Insecta	Dermaptera	Anisolabididae	Euborellia	annulipes		Euborellia annulipes	(Lucas, 1847)	Euborellia annulipes (Lucas, 1847)	species	INTR	Borges, P. A.V.	2016
DTP Collection_212	Palearctic	Portugal	Azores	Terceira	Praia da Vitória	Paul da Praia Vitória	Paul da Praia Vitória- Margins; PPV-T200	38°44’06.44’’N, 27°03’36.21’’W	38.735	-27.06	WGS84	6	10	2017-08-23	Day/Night	Pitfall	sample 25	na	Pimentel, C.				1	1	Animalia	Arthropoda	Insecta	Dermaptera	Anisolabididae	Euborellia	annulipes		Euborellia annulipes	(Lucas, 1847)	Euborellia annulipes (Lucas, 1847)	species	INTR	Borges, P. A.V.	2017
DTP Collection_233	Palearctic	Portugal	Azores	Terceira	Praia da Vitória	Paul da Pedreira	Paul da Pedreira; PPCP-T202	38°42’13.09’’N; 27°02’46.37’’W	38.7043	-27.0465	WGS84	3	10	2016-08-30	Day/Night	Pitfall	sample 24	na	Pimentel, C.				4	4	Animalia	Arthropoda	Insecta	Dermaptera	Anisolabididae	Euborellia	annulipes		Euborellia annulipes	(Lucas, 1847)	Euborellia annulipes (Lucas, 1847)	species	INTR	Borges, P. A.V.	2016
DTP Collection_234	Palearctic	Portugal	Azores	Terceira	Praia da Vitória	Paul da Praia Vitória	Paul da Praia Vitória- Margins; PPV-T200	38°44’06.44’’N, 27°03’36.21’’W	38.735	-27.06	WGS84	6	10	2017-08-23	Day/Night	Pitfall	sample 24	na	Pimentel, C.	1				1	Animalia	Arthropoda	Insecta	Dermaptera	Anisolabididae	Euborellia	annulipes		Euborellia annulipes	(Lucas, 1847)	Euborellia annulipes (Lucas, 1847)	species	INTR	Borges, P. A.V.	2017
DTP Collection_265	Palearctic	Portugal	Azores	Terceira	Praia da Vitória	Paul da Pedreira	Paul da Pedreira; PPCP-T202	38°42’13.09’’N; 27°02’46.37’’W	38.7043	-27.0465	WGS84	3	10	2016-08-30	Day/Night	Pitfall	sample 23	na	Pimentel, C.				5	5	Animalia	Arthropoda	Insecta	Dermaptera	Anisolabididae	Euborellia	annulipes		Euborellia annulipes	(Lucas, 1847)	Euborellia annulipes (Lucas, 1847)	species	INTR	Borges, P. A.V.	2016
DTP Collection_266	Palearctic	Portugal	Azores	Terceira	Praia da Vitória	Paul da Praia Vitória	Paul da Praia Vitória- Margins; PPV-T200	38°44’06.44’’N, 27°03’36.21’’W	38.735	-27.06	WGS84	6	10	2017-08-23	Day/Night	Pitfall	sample 23	na	Pimentel, C.				12	12	Animalia	Arthropoda	Insecta	Dermaptera	Anisolabididae	Euborellia	annulipes		Euborellia annulipes	(Lucas, 1847)	Euborellia annulipes (Lucas, 1847)	species	INTR	Borges, P. A.V.	2017
DTP Collection_267	Palearctic	Portugal	Azores	Terceira	Praia da Vitória	Paul do Belo Jardim	Paul do Belo Jardim - Margins; PBJ-T203	38°42’47.95’’N, 27°03’40.93’’W	38.7134	-27.0616	WGS84	5	10	2017-08-16	Day/Night	Pitfall	sample 23	na	Pimentel, C.				1	1	Animalia	Arthropoda	Insecta	Dermaptera	Anisolabididae	Euborellia	annulipes		Euborellia annulipes	(Lucas, 1847)	Euborellia annulipes (Lucas, 1847)	species	INTR	Borges, P. A.V.	2017
DTP Collection_296	Palearctic	Portugal	Azores	Terceira	Praia da Vitória	Paul do Belo Jardim	Paul do Belo Jardim - Margins; PBJ-T203	38°42’47.95’’N, 27°03’40.93’’W	38.7134	-27.0616	WGS84	5	10	2016-09-07	Day/Night	Pitfall	sample 22	na	Pimentel, C.				1	1	Animalia	Arthropoda	Insecta	Dermaptera	Anisolabididae	Euborellia	annulipes		Euborellia annulipes	(Lucas, 1847)	Euborellia annulipes (Lucas, 1847)	species	INTR	Borges, P. A.V.	2016
DTP Collection_297	Palearctic	Portugal	Azores	Terceira	Praia da Vitória	Paul da Praia Vitória	Paul da Praia Vitória- Margins; PPV-T200	38°44’06.44’’N, 27°03’36.21’’W	38.735	-27.06	WGS84	6	10	2017-08-23	Day/Night	Pitfall	sample 22	na	Pimentel, C.			1	4	5	Animalia	Arthropoda	Insecta	Dermaptera	Anisolabididae	Euborellia	annulipes		Euborellia annulipes	(Lucas, 1847)	Euborellia annulipes (Lucas, 1847)	species	INTR	Borges, P. A.V.	2017
DTP Collection_298	Palearctic	Portugal	Azores	Terceira	Praia da Vitória	Paul do Belo Jardim	Paul do Belo Jardim - Margins; PBJ-T203	38°42’47.95’’N, 27°03’40.93’’W	38.7134	-27.0616	WGS84	5	10	2017-08-16	Day/Night	Pitfall	sample 22	na	Pimentel, C.				4	4	Animalia	Arthropoda	Insecta	Dermaptera	Anisolabididae	Euborellia	annulipes		Euborellia annulipes	(Lucas, 1847)	Euborellia annulipes (Lucas, 1847)	species	INTR	Borges, P. A.V.	2017
DTP Collection_328	Palearctic	Portugal	Azores	Terceira	Praia da Vitória	Paul da Pedreira	Paul da Pedreira; PPCP-T202	38°42’13.09’’N; 27°02’46.37’’W	38.7043	-27.0465	WGS84	3	10	2016-08-30	Day/Night	Pitfall	sample 21	na	Pimentel, C.				2	2	Animalia	Arthropoda	Insecta	Dermaptera	Anisolabididae	Euborellia	annulipes		Euborellia annulipes	(Lucas, 1847)	Euborellia annulipes (Lucas, 1847)	species	INTR	Borges, P. A.V.	2016
DTP Collection_329	Palearctic	Portugal	Azores	Terceira	Praia da Vitória	Paul do Belo Jardim	Paul do Belo Jardim - Margins; PBJ-T203	38°42’47.95’’N, 27°03’40.93’’W	38.7134	-27.0616	WGS84	5	10	2016-09-07	Day/Night	Pitfall	sample 21	na	Pimentel, C.	1			1	2	Animalia	Arthropoda	Insecta	Dermaptera	Anisolabididae	Euborellia	annulipes		Euborellia annulipes	(Lucas, 1847)	Euborellia annulipes (Lucas, 1847)	species	INTR	Borges, P. A.V.	2016
DTP Collection_330	Palearctic	Portugal	Azores	Terceira	Praia da Vitória	Paul da Praia Vitória	Paul da Praia Vitória- Margins; PPV-T200	38°44’06.44’’N, 27°03’36.21’’W	38.735	-27.06	WGS84	6	10	2017-08-23	Day/Night	Pitfall	sample 21	na	Pimentel, C.				4	4	Animalia	Arthropoda	Insecta	Dermaptera	Anisolabididae	Euborellia	annulipes		Euborellia annulipes	(Lucas, 1847)	Euborellia annulipes (Lucas, 1847)	species	INTR	Borges, P. A.V.	2017
DTP Collection_331	Palearctic	Portugal	Azores	Terceira	Praia da Vitória	Paul do Belo Jardim	Paul do Belo Jardim - Margins; PBJ-T203	38°42’47.95’’N, 27°03’40.93’’W	38.7134	-27.0616	WGS84	5	10	2017-08-16	Day/Night	Pitfall	sample 21	na	Pimentel, C.	1			9	10	Animalia	Arthropoda	Insecta	Dermaptera	Anisolabididae	Euborellia	annulipes		Euborellia annulipes	(Lucas, 1847)	Euborellia annulipes (Lucas, 1847)	species	INTR	Borges, P. A.V.	2017
DTP Collection_357	Palearctic	Portugal	Azores	Terceira	Praia da Vitória	Paul da Pedreira	Paul da Pedreira; PPCP-T202	38°42’13.09’’N; 27°02’46.37’’W	38.7043	-27.0465	WGS84	3	10	2016-08-30	Day/Night	Pitfall	sample 20	na	Pimentel, C.				5	5	Animalia	Arthropoda	Insecta	Dermaptera	Anisolabididae	Euborellia	annulipes		Euborellia annulipes	(Lucas, 1847)	Euborellia annulipes (Lucas, 1847)	species	INTR	Borges, P. A.V.	2016
DTP Collection_358	Palearctic	Portugal	Azores	Terceira	Praia da Vitória	Paul da Praia Vitória	Paul da Praia Vitória- Margins; PPV-T200	38°44’06.44’’N, 27°03’36.21’’W	38.735	-27.06	WGS84	6	10	2017-08-23	Day/Night	Pitfall	sample 20	na	Pimentel, C.				2	2	Animalia	Arthropoda	Insecta	Dermaptera	Anisolabididae	Euborellia	annulipes		Euborellia annulipes	(Lucas, 1847)	Euborellia annulipes (Lucas, 1847)	species	INTR	Borges, P. A.V.	2017
DTP Collection_359	Palearctic	Portugal	Azores	Terceira	Praia da Vitória	Paul do Belo Jardim	Paul do Belo Jardim - Margins; PBJ-T203	38°42’47.95’’N, 27°03’40.93’’W	38.7134	-27.0616	WGS84	5	10	2017-08-16	Day/Night	Pitfall	sample 20	na	Pimentel, C.	6			9	15	Animalia	Arthropoda	Insecta	Dermaptera	Anisolabididae	Euborellia	annulipes		Euborellia annulipes	(Lucas, 1847)	Euborellia annulipes (Lucas, 1847)	species	INTR	Borges, P. A.V.	2017
DTP Collection_389	Palearctic	Portugal	Azores	Terceira	Praia da Vitória	Paul da Pedreira	Paul da Pedreira; PPCP-T202	38°42’13.09’’N; 27°02’46.37’’W	38.7043	-27.0465	WGS84	3	10	2016-08-30	Day/Night	Pitfall	sample 19	na	Pimentel, C.			1		1	Animalia	Arthropoda	Insecta	Dermaptera	Anisolabididae	Euborellia	annulipes		Euborellia annulipes	(Lucas, 1847)	Euborellia annulipes (Lucas, 1847)	species	INTR	Borges, P. A.V.	2016
DTP Collection_390	Palearctic	Portugal	Azores	Terceira	Praia da Vitória	Paul da Praia Vitória	Paul da Praia Vitória- Margins; PPV-T200	38°44’06.44’’N, 27°03’36.21’’W	38.735	-27.06	WGS84	6	10	2017-08-23	Day/Night	Pitfall	sample 19	na	Pimentel, C.				5	5	Animalia	Arthropoda	Insecta	Dermaptera	Anisolabididae	Euborellia	annulipes		Euborellia annulipes	(Lucas, 1847)	Euborellia annulipes (Lucas, 1847)	species	INTR	Borges, P. A.V.	2017
DTP Collection_391	Palearctic	Portugal	Azores	Terceira	Praia da Vitória	Paul do Belo Jardim	Paul do Belo Jardim - Margins; PBJ-T203	38°42’47.95’’N, 27°03’40.93’’W	38.7134	-27.0616	WGS84	5	10	2017-08-16	Day/Night	Pitfall	sample 19	na	Pimentel, C.	1				1	Animalia	Arthropoda	Insecta	Dermaptera	Anisolabididae	Euborellia	annulipes		Euborellia annulipes	(Lucas, 1847)	Euborellia annulipes (Lucas, 1847)	species	INTR	Borges, P. A.V.	2017
DTP Collection_420	Palearctic	Portugal	Azores	Terceira	Praia da Vitória	Paul da Pedreira	Paul da Pedreira; PPCP-T202	38°42’13.09’’N; 27°02’46.37’’W	38.7043	-27.0465	WGS84	3	10	2016-08-30	Day/Night	Pitfall	sample 18	na	Pimentel, C.			2	6	8	Animalia	Arthropoda	Insecta	Dermaptera	Anisolabididae	Euborellia	annulipes		Euborellia annulipes	(Lucas, 1847)	Euborellia annulipes (Lucas, 1847)	species	INTR	Borges, P. A.V.	2016
DTP Collection_421	Palearctic	Portugal	Azores	Terceira	Praia da Vitória	Paul da Praia Vitória	Paul da Praia Vitória- Margins; PPV-T200	38°44’06.44’’N, 27°03’36.21’’W	38.735	-27.06	WGS84	6	10	2017-08-23	Day/Night	Pitfall	sample 18	na	Pimentel, C.				5	5	Animalia	Arthropoda	Insecta	Dermaptera	Anisolabididae	Euborellia	annulipes		Euborellia annulipes	(Lucas, 1847)	Euborellia annulipes (Lucas, 1847)	species	INTR	Borges, P. A.V.	2017
DTP Collection_422	Palearctic	Portugal	Azores	Terceira	Praia da Vitória	Paul do Belo Jardim	Paul do Belo Jardim - Margins; PBJ-T203	38°42’47.95’’N, 27°03’40.93’’W	38.7134	-27.0616	WGS84	5	10	2017-08-16	Day/Night	Pitfall	sample 18	na	Pimentel, C.	1				1	Animalia	Arthropoda	Insecta	Dermaptera	Anisolabididae	Euborellia	annulipes		Euborellia annulipes	(Lucas, 1847)	Euborellia annulipes (Lucas, 1847)	species	INTR	Borges, P. A.V.	2017
DTP Collection_453	Palearctic	Portugal	Azores	Terceira	Praia da Vitória	Paul da Pedreira	Paul da Pedreira; PPCP-T202	38°42’13.09’’N; 27°02’46.37’’W	38.7043	-27.0465	WGS84	3	10	2016-08-30	Day/Night	Pitfall	sample 17	na	Pimentel, C.				8	8	Animalia	Arthropoda	Insecta	Dermaptera	Anisolabididae	Euborellia	annulipes		Euborellia annulipes	(Lucas, 1847)	Euborellia annulipes (Lucas, 1847)	species	INTR	Borges, P. A.V.	2016
DTP Collection_454	Palearctic	Portugal	Azores	Terceira	Praia da Vitória	Paul da Praia Vitória	Paul da Praia Vitória- Margins; PPV-T200	38°44’06.44’’N, 27°03’36.21’’W	38.735	-27.06	WGS84	6	10	2017-08-23	Day/Night	Pitfall	sample 17	na	Pimentel, C.			1	2	3	Animalia	Arthropoda	Insecta	Dermaptera	Anisolabididae	Euborellia	annulipes		Euborellia annulipes	(Lucas, 1847)	Euborellia annulipes (Lucas, 1847)	species	INTR	Borges, P. A.V.	2017
DTP Collection_485	Palearctic	Portugal	Azores	Terceira	Praia da Vitória	Paul da Pedreira	Paul da Pedreira; PPCP-T202	38°42’13.09’’N; 27°02’46.37’’W	38.7043	-27.0465	WGS84	3	10	2016-08-30	Day/Night	Pitfall	sample 16	na	Pimentel, C.				2	2	Animalia	Arthropoda	Insecta	Dermaptera	Anisolabididae	Euborellia	annulipes		Euborellia annulipes	(Lucas, 1847)	Euborellia annulipes (Lucas, 1847)	species	INTR	Borges, P. A.V.	2016
DTP Collection_486	Palearctic	Portugal	Azores	Terceira	Praia da Vitória	Paul do Belo Jardim	Paul do Belo Jardim - Margins; PBJ-T203	38°42’47.95’’N, 27°03’40.93’’W	38.7134	-27.0616	WGS84	5	10	2016-09-07	Day/Night	Pitfall	sample 16	na	Pimentel, C.				2	2	Animalia	Arthropoda	Insecta	Dermaptera	Anisolabididae	Euborellia	annulipes		Euborellia annulipes	(Lucas, 1847)	Euborellia annulipes (Lucas, 1847)	species	INTR	Borges, P. A.V.	2016
DTP Collection_487	Palearctic	Portugal	Azores	Terceira	Praia da Vitória	Paul da Praia Vitória	Paul da Praia Vitória- Margins; PPV-T200	38°44’06.44’’N, 27°03’36.21’’W	38.735	-27.06	WGS84	6	10	2017-08-23	Day/Night	Pitfall	sample 16	na	Pimentel, C.			1	4	5	Animalia	Arthropoda	Insecta	Dermaptera	Anisolabididae	Euborellia	annulipes		Euborellia annulipes	(Lucas, 1847)	Euborellia annulipes (Lucas, 1847)	species	INTR	Borges, P. A.V.	2017
DTP Collection_488	Palearctic	Portugal	Azores	Terceira	Praia da Vitória	Paul do Belo Jardim	Paul do Belo Jardim - Margins; PBJ-T203	38°42’47.95’’N, 27°03’40.93’’W	38.7134	-27.0616	WGS84	5	10	2017-08-16	Day/Night	Pitfall	sample 16	na	Pimentel, C.	2			1	3	Animalia	Arthropoda	Insecta	Dermaptera	Anisolabididae	Euborellia	annulipes		Euborellia annulipes	(Lucas, 1847)	Euborellia annulipes (Lucas, 1847)	species	INTR	Borges, P. A.V.	2017
DTP Collection_524	Palearctic	Portugal	Azores	Terceira	Praia da Vitória	Paul da Pedreira	Paul da Pedreira; PPCP-T202	38°42’13.09’’N; 27°02’46.37’’W	38.7043	-27.0465	WGS84	3	10	2016-08-30	Day/Night	Pitfall	sample 15	na	Pimentel, C.				8	8	Animalia	Arthropoda	Insecta	Dermaptera	Anisolabididae	Euborellia	annulipes		Euborellia annulipes	(Lucas, 1847)	Euborellia annulipes (Lucas, 1847)	species	INTR	Borges, P. A.V.	2016
DTP Collection_525	Palearctic	Portugal	Azores	Terceira	Praia da Vitória	Paul da Praia Vitória	Paul da Praia Vitória- Margins; PPV-T200	38°44’06.44’’N, 27°03’36.21’’W	38.735	-27.06	WGS84	6	10	2017-08-23	Day/Night	Pitfall	sample 15	na	Pimentel, C.			1	7	8	Animalia	Arthropoda	Insecta	Dermaptera	Anisolabididae	Euborellia	annulipes		Euborellia annulipes	(Lucas, 1847)	Euborellia annulipes (Lucas, 1847)	species	INTR	Borges, P. A.V.	2017
DTP Collection_526	Palearctic	Portugal	Azores	Terceira	Praia da Vitória	Paul da Praia Vitória	Paul da Praia Vitória - Island; PPV-T201	38°44’06.44’’N, 27°03’36.21’’W	38.735	-27.06	WGS84	6	10	2017-08-23	Day/Night	Pitfall	sample 15	na	Pimentel, C.	3			19	22	Animalia	Arthropoda	Insecta	Dermaptera	Anisolabididae	Euborellia	annulipes		Euborellia annulipes	(Lucas, 1847)	Euborellia annulipes (Lucas, 1847)	species	INTR	Borges, P. A.V.	2017
DTP Collection_563	Palearctic	Portugal	Azores	Terceira	Praia da Vitória	Paul da Pedreira	Paul da Pedreira; PPCP-T202	38°42’13.09’’N; 27°02’46.37’’W	38.7043	-27.0465	WGS84	3	10	2016-08-30	Day/Night	Pitfall	sample 14	na	Pimentel, C.		1			1	Animalia	Arthropoda	Insecta	Dermaptera	Anisolabididae	Euborellia	annulipes		Euborellia annulipes	(Lucas, 1847)	Euborellia annulipes (Lucas, 1847)	species	INTR	Borges, P. A.V.	2016
DTP Collection_564	Palearctic	Portugal	Azores	Terceira	Praia da Vitória	Paul da Praia Vitória	Paul da Praia Vitória - Island; PPV-T201	38°44’06.44’’N, 27°03’36.21’’W	38.735	-27.06	WGS84	6	10	2017-08-23	Day/Night	Pitfall	sample 14	na	Pimentel, C.				16	16	Animalia	Arthropoda	Insecta	Dermaptera	Anisolabididae	Euborellia	annulipes		Euborellia annulipes	(Lucas, 1847)	Euborellia annulipes (Lucas, 1847)	species	INTR	Borges, P. A.V.	2017
DTP Collection_602	Palearctic	Portugal	Azores	Terceira	Praia da Vitória	Paul da Pedreira	Paul da Pedreira; PPCP-T202	38°42’13.09’’N; 27°02’46.37’’W	38.7043	-27.0465	WGS84	3	10	2016-08-30	Day/Night	Pitfall	sample 13	na	Pimentel, C.			1	3	4	Animalia	Arthropoda	Insecta	Dermaptera	Anisolabididae	Euborellia	annulipes		Euborellia annulipes	(Lucas, 1847)	Euborellia annulipes (Lucas, 1847)	species	INTR	Borges, P. A.V.	2016
DTP Collection_603	Palearctic	Portugal	Azores	Terceira	Praia da Vitória	Paul da Praia Vitória	Paul da Praia Vitória- Margins; PPV-T200	38°44’06.44’’N, 27°03’36.21’’W	38.735	-27.06	WGS84	6	10	2016-08-26	Day/Night	Pitfall	sample 13	na	Pimentel, C.				3	3	Animalia	Arthropoda	Insecta	Dermaptera	Anisolabididae	Euborellia	annulipes		Euborellia annulipes	(Lucas, 1847)	Euborellia annulipes (Lucas, 1847)	species	INTR	Borges, P. A.V.	2016
DTP Collection_604	Palearctic	Portugal	Azores	Terceira	Praia da Vitória	Paul da Praia Vitória	Paul da Praia Vitória- Margins; PPV-T200	38°44’06.44’’N, 27°03’36.21’’W	38.735	-27.06	WGS84	6	10	2017-08-23	Day/Night	Pitfall	sample 13	na	Pimentel, C.			3	13	16	Animalia	Arthropoda	Insecta	Dermaptera	Anisolabididae	Euborellia	annulipes		Euborellia annulipes	(Lucas, 1847)	Euborellia annulipes (Lucas, 1847)	species	INTR	Borges, P. A.V.	2017
DTP Collection_605	Palearctic	Portugal	Azores	Terceira	Praia da Vitória	Paul da Praia Vitória	Paul da Praia Vitória - Island; PPV-T201	38°44’06.44’’N, 27°03’36.21’’W	38.735	-27.06	WGS84	6	10	2017-08-23	Day/Night	Pitfall	sample 13	na	Pimentel, C.				2	2	Animalia	Arthropoda	Insecta	Dermaptera	Anisolabididae	Euborellia	annulipes		Euborellia annulipes	(Lucas, 1847)	Euborellia annulipes (Lucas, 1847)	species	INTR	Borges, P. A.V.	2017
DTP Collection_654	Palearctic	Portugal	Azores	Terceira	Praia da Vitória	Paul da Pedreira	Paul da Pedreira; PPCP-T202	38°42’13.09’’N; 27°02’46.37’’W	38.7043	-27.0465	WGS84	3	10	2016-08-30	Day/Night	Pitfall	sample 12	na	Pimentel, C.				12	12	Animalia	Arthropoda	Insecta	Dermaptera	Anisolabididae	Euborellia	annulipes		Euborellia annulipes	(Lucas, 1847)	Euborellia annulipes (Lucas, 1847)	species	INTR	Borges, P. A.V.	2016
DTP Collection_655	Palearctic	Portugal	Azores	Terceira	Praia da Vitória	Paul do Belo Jardim	Paul do Belo Jardim - Stream; PBJ-T204	38°42’47.95’’N, 27°03’40.93’’W	38.7134	-27.0616	WGS84	5	10	2016-09-07	Day/Night	Pitfall	sample 12	na	Pimentel, C.				1	1	Animalia	Arthropoda	Insecta	Dermaptera	Anisolabididae	Euborellia	annulipes		Euborellia annulipes	(Lucas, 1847)	Euborellia annulipes (Lucas, 1847)	species	INTR	Borges, P. A.V.	2016
DTP Collection_656	Palearctic	Portugal	Azores	Terceira	Praia da Vitória	Paul da Praia Vitória	Paul da Praia Vitória- Margins; PPV-T200	38°44’06.44’’N, 27°03’36.21’’W	38.735	-27.06	WGS84	6	10	2016-08-26	Day/Night	Pitfall	sample 12	na	Pimentel, C.				1	1	Animalia	Arthropoda	Insecta	Dermaptera	Anisolabididae	Euborellia	annulipes		Euborellia annulipes	(Lucas, 1847)	Euborellia annulipes (Lucas, 1847)	species	INTR	Borges, P. A.V.	2016
DTP Collection_657	Palearctic	Portugal	Azores	Terceira	Praia da Vitória	Paul da Praia Vitória	Paul da Praia Vitória- Margins; PPV-T200	38°44’06.44’’N, 27°03’36.21’’W	38.735	-27.06	WGS84	6	10	2017-08-23	Day/Night	Pitfall	sample 12	na	Pimentel, C.	2			5	7	Animalia	Arthropoda	Insecta	Dermaptera	Anisolabididae	Euborellia	annulipes		Euborellia annulipes	(Lucas, 1847)	Euborellia annulipes (Lucas, 1847)	species	INTR	Borges, P. A.V.	2017
DTP Collection_658	Palearctic	Portugal	Azores	Terceira	Praia da Vitória	Paul da Praia Vitória	Paul da Praia Vitória - Island; PPV-T201	38°44’06.44’’N, 27°03’36.21’’W	38.735	-27.06	WGS84	6	10	2017-08-23	Day/Night	Pitfall	sample 12	na	Pimentel, C.	5			16	21	Animalia	Arthropoda	Insecta	Dermaptera	Anisolabididae	Euborellia	annulipes		Euborellia annulipes	(Lucas, 1847)	Euborellia annulipes (Lucas, 1847)	species	INTR	Borges, P. A.V.	2017
DTP Collection_711	Palearctic	Portugal	Azores	Terceira	Praia da Vitória	Paul da Pedreira	Paul da Pedreira; PPCP-T202	38°42’13.09’’N; 27°02’46.37’’W	38.7043	-27.0465	WGS84	3	10	2016-08-30	Day/Night	Pitfall	sample 11	na	Pimentel, C.				3	3	Animalia	Arthropoda	Insecta	Dermaptera	Anisolabididae	Euborellia	annulipes		Euborellia annulipes	(Lucas, 1847)	Euborellia annulipes (Lucas, 1847)	species	INTR	Borges, P. A.V.	2016
DTP Collection_712	Palearctic	Portugal	Azores	Terceira	Praia da Vitória	Paul da Praia Vitória	Paul da Praia Vitória- Margins; PPV-T200	38°44’06.44’’N, 27°03’36.21’’W	38.735	-27.06	WGS84	6	10	2016-08-26	Day/Night	Pitfall	sample 11	na	Pimentel, C.	2				2	Animalia	Arthropoda	Insecta	Dermaptera	Anisolabididae	Euborellia	annulipes		Euborellia annulipes	(Lucas, 1847)	Euborellia annulipes (Lucas, 1847)	species	INTR	Borges, P. A.V.	2016
DTP Collection_713	Palearctic	Portugal	Azores	Terceira	Praia da Vitória	Paul da Praia Vitória	Paul da Praia Vitória - Island; PPV-T201	38°44’06.44’’N, 27°03’36.21’’W	38.735	-27.06	WGS84	6	10	2016-08-26	Day/Night	Pitfall	sample 11	na	Pimentel, C.				2	2	Animalia	Arthropoda	Insecta	Dermaptera	Anisolabididae	Euborellia	annulipes		Euborellia annulipes	(Lucas, 1847)	Euborellia annulipes (Lucas, 1847)	species	INTR	Borges, P. A.V.	2016
DTP Collection_714	Palearctic	Portugal	Azores	Terceira	Praia da Vitória	Paul da Praia Vitória	Paul da Praia Vitória- Margins; PPV-T200	38°44’06.44’’N, 27°03’36.21’’W	38.735	-27.06	WGS84	6	10	2017-08-23	Day/Night	Pitfall	sample 11	na	Pimentel, C.	1			3	4	Animalia	Arthropoda	Insecta	Dermaptera	Anisolabididae	Euborellia	annulipes		Euborellia annulipes	(Lucas, 1847)	Euborellia annulipes (Lucas, 1847)	species	INTR	Borges, P. A.V.	2017
DTP Collection_715	Palearctic	Portugal	Azores	Terceira	Praia da Vitória	Paul da Praia Vitória	Paul da Praia Vitória - Island; PPV-T201	38°44’06.44’’N, 27°03’36.21’’W	38.735	-27.06	WGS84	6	10	2017-08-23	Day/Night	Pitfall	sample 11	na	Pimentel, C.				16	16	Animalia	Arthropoda	Insecta	Dermaptera	Anisolabididae	Euborellia	annulipes		Euborellia annulipes	(Lucas, 1847)	Euborellia annulipes (Lucas, 1847)	species	INTR	Borges, P. A.V.	2017
DTP Collection_716	Palearctic	Portugal	Azores	Terceira	Praia da Vitória	Paul do Belo Jardim	Paul do Belo Jardim - Margins; PBJ-T203	38°42’47.95’’N, 27°03’40.93’’W	38.7134	-27.0616	WGS84	5	10	2017-08-16	Day/Night	Pitfall	sample 11	na	Pimentel, C.	1				1	Animalia	Arthropoda	Insecta	Dermaptera	Anisolabididae	Euborellia	annulipes		Euborellia annulipes	(Lucas, 1847)	Euborellia annulipes (Lucas, 1847)	species	INTR	Borges, P. A.V.	2017
DTP Collection_809	Palearctic	Portugal	Azores	Terceira	Praia da Vitória	Paul da Pedreira	Paul da Pedreira; PPCP-T202	38°42’13.09’’N; 27°02’46.37’’W	38.7043	-27.0465	WGS84	3	10	2016-08-30	Day/Night	Pitfall	sample 10	na	Pimentel, C.	1			4	5	Animalia	Arthropoda	Insecta	Dermaptera	Anisolabididae	Euborellia	annulipes		Euborellia annulipes	(Lucas, 1847)	Euborellia annulipes (Lucas, 1847)	species	INTR	Borges, P. A.V.	2016
DTP Collection_810	Palearctic	Portugal	Azores	Terceira	Praia da Vitória	Paul do Belo Jardim	Paul do Belo Jardim - Margins; PBJ-T203	38°42’47.95’’N, 27°03’40.93’’W	38.7134	-27.0616	WGS84	5	10	2016-09-07	Day/Night	Pitfall	sample 10	na	Pimentel, C.	3			2	5	Animalia	Arthropoda	Insecta	Dermaptera	Anisolabididae	Euborellia	annulipes		Euborellia annulipes	(Lucas, 1847)	Euborellia annulipes (Lucas, 1847)	species	INTR	Borges, P. A.V.	2016
DTP Collection_811	Palearctic	Portugal	Azores	Terceira	Praia da Vitória	Paul da Praia Vitória	Paul da Praia Vitória- Margins; PPV-T200	38°44’06.44’’N, 27°03’36.21’’W	38.735	-27.06	WGS84	6	10	2016-08-26	Day/Night	Pitfall	sample 10	na	Pimentel, C.				1	1	Animalia	Arthropoda	Insecta	Dermaptera	Anisolabididae	Euborellia	annulipes		Euborellia annulipes	(Lucas, 1847)	Euborellia annulipes (Lucas, 1847)	species	INTR	Borges, P. A.V.	2016
DTP Collection_812	Palearctic	Portugal	Azores	Terceira	Praia da Vitória	Paul da Praia Vitória	Paul da Praia Vitória - Island; PPV-T201	38°44’06.44’’N, 27°03’36.21’’W	38.735	-27.06	WGS84	6	10	2017-08-23	Day/Night	Pitfall	sample 10	na	Pimentel, C.				3	3	Animalia	Arthropoda	Insecta	Dermaptera	Anisolabididae	Euborellia	annulipes		Euborellia annulipes	(Lucas, 1847)	Euborellia annulipes (Lucas, 1847)	species	INTR	Borges, P. A.V.	2017
DTP Collection_813	Palearctic	Portugal	Azores	Terceira	Praia da Vitória	Paul do Belo Jardim	Paul do Belo Jardim - Margins; PBJ-T203	38°42’47.95’’N, 27°03’40.93’’W	38.7134	-27.0616	WGS84	5	10	2017-08-16	Day/Night	Pitfall	sample 10	na	Pimentel, C.				1	1	Animalia	Arthropoda	Insecta	Dermaptera	Anisolabididae	Euborellia	annulipes		Euborellia annulipes	(Lucas, 1847)	Euborellia annulipes (Lucas, 1847)	species	INTR	Borges, P. A.V.	2017
DTP Collection_814	Palearctic	Portugal	Azores	Terceira	Praia da Vitória	Paul do Belo Jardim	Paul do Belo Jardim - Stream; PBJ-T204	38°42’47.95’’N, 27°03’40.93’’W	38.7134	-27.0616	WGS84	5	10	2017-08-16	Day/Night	Pitfall	sample 10	na	Pimentel, C.	2				2	Animalia	Arthropoda	Insecta	Dermaptera	Anisolabididae	Euborellia	annulipes		Euborellia annulipes	(Lucas, 1847)	Euborellia annulipes (Lucas, 1847)	species	INTR	Borges, P. A.V.	2017
DTP Collection_989	Palearctic	Portugal	Azores	Terceira	Praia da Vitória	Paul da Pedreira	Paul da Pedreira; PPCP-T202	38°42’13.09’’N; 27°02’46.37’’W	38.7043	-27.0465	WGS84	3	10	2016-08-30	Day/Night	Pitfall	sample 09	na	Pimentel, C.				1	1	Animalia	Arthropoda	Insecta	Dermaptera	Anisolabididae	Euborellia	annulipes		Euborellia annulipes	(Lucas, 1847)	Euborellia annulipes (Lucas, 1847)	species	INTR	Borges, P. A.V.	2016
DTP Collection_990	Palearctic	Portugal	Azores	Terceira	Praia da Vitória	Paul do Belo Jardim	Paul do Belo Jardim - Margins; PBJ-T203	38°42’47.95’’N, 27°03’40.93’’W	38.7134	-27.0616	WGS84	5	10	2016-09-07	Day/Night	Pitfall	sample 09	na	Pimentel, C.	1			7	8	Animalia	Arthropoda	Insecta	Dermaptera	Anisolabididae	Euborellia	annulipes		Euborellia annulipes	(Lucas, 1847)	Euborellia annulipes (Lucas, 1847)	species	INTR	Borges, P. A.V.	2016
DTP Collection_991	Palearctic	Portugal	Azores	Terceira	Praia da Vitória	Paul da Praia Vitória	Paul da Praia Vitória- Margins; PPV-T200	38°44’06.44’’N, 27°03’36.21’’W	38.735	-27.06	WGS84	6	10	2016-08-26	Day/Night	Pitfall	sample 09	na	Pimentel, C.	1			4	5	Animalia	Arthropoda	Insecta	Dermaptera	Anisolabididae	Euborellia	annulipes		Euborellia annulipes	(Lucas, 1847)	Euborellia annulipes (Lucas, 1847)	species	INTR	Borges, P. A.V.	2016
DTP Collection_992	Palearctic	Portugal	Azores	Terceira	Praia da Vitória	Paul da Praia Vitória	Paul da Praia Vitória- Margins; PPV-T200	38°44’06.44’’N, 27°03’36.21’’W	38.735	-27.06	WGS84	6	10	2016-08-26	Day/Night	Pitfall	sample 09	na	Pimentel, C.				1	1	Animalia	Arthropoda	Insecta	Dermaptera	Anisolabididae	Euborellia	annulipes		Euborellia annulipes	(Lucas, 1847)	Euborellia annulipes (Lucas, 1847)	species	INTR	Borges, P. A.V.	2016
DTP Collection_993	Palearctic	Portugal	Azores	Terceira	Praia da Vitória	Paul da Praia Vitória	Paul da Praia Vitória- Margins; PPV-T200	38°44’06.44’’N, 27°03’36.21’’W	38.735	-27.06	WGS84	6	10	2017-08-23	Day/Night	Pitfall	sample 09	na	Pimentel, C.				3	3	Animalia	Arthropoda	Insecta	Dermaptera	Anisolabididae	Euborellia	annulipes		Euborellia annulipes	(Lucas, 1847)	Euborellia annulipes (Lucas, 1847)	species	INTR	Borges, P. A.V.	2017
DTP Collection_994	Palearctic	Portugal	Azores	Terceira	Praia da Vitória	Paul da Praia Vitória	Paul da Praia Vitória - Island; PPV-T201	38°44’06.44’’N, 27°03’36.21’’W	38.735	-27.06	WGS84	6	10	2017-08-23	Day/Night	Pitfall	sample 09	na	Pimentel, C.				4	4	Animalia	Arthropoda	Insecta	Dermaptera	Anisolabididae	Euborellia	annulipes		Euborellia annulipes	(Lucas, 1847)	Euborellia annulipes (Lucas, 1847)	species	INTR	Borges, P. A.V.	2017
DTP Collection_995	Palearctic	Portugal	Azores	Terceira	Praia da Vitória	Paul do Belo Jardim	Paul do Belo Jardim - Margins; PBJ-T203	38°42’47.95’’N, 27°03’40.93’’W	38.7134	-27.0616	WGS84	5	10	2017-08-16	Day/Night	Pitfall	sample 09	na	Pimentel, C.	1				1	Animalia	Arthropoda	Insecta	Dermaptera	Anisolabididae	Euborellia	annulipes		Euborellia annulipes	(Lucas, 1847)	Euborellia annulipes (Lucas, 1847)	species	INTR	Borges, P. A.V.	2017
DTP Collection_1161	Palearctic	Portugal	Azores	Terceira	Praia da Vitória	Paul da Pedreira	Paul da Pedreira; PPCP-T202	38°42’13.09’’N; 27°02’46.37’’W	38.7043	-27.0465	WGS84	3	10	2016-08-30	Day/Night	Pitfall	sample 08	na	Pimentel, C.				1	1	Animalia	Arthropoda	Insecta	Dermaptera	Anisolabididae	Euborellia	annulipes		Euborellia annulipes	(Lucas, 1847)	Euborellia annulipes (Lucas, 1847)	species	INTR	Borges, P. A.V.	2016
DTP Collection_1162	Palearctic	Portugal	Azores	Terceira	Praia da Vitória	Paul do Belo Jardim	Paul do Belo Jardim - Margins; PBJ-T203	38°42’47.95’’N, 27°03’40.93’’W	38.7134	-27.0616	WGS84	5	10	2016-09-07	Day/Night	Pitfall	sample 08	na	Pimentel, C.	1				1	Animalia	Arthropoda	Insecta	Dermaptera	Anisolabididae	Euborellia	annulipes		Euborellia annulipes	(Lucas, 1847)	Euborellia annulipes (Lucas, 1847)	species	INTR	Borges, P. A.V.	2016
DTP Collection_1163	Palearctic	Portugal	Azores	Terceira	Praia da Vitória	Paul da Praia Vitória	Paul da Praia Vitória- Margins; PPV-T200	38°44’06.44’’N, 27°03’36.21’’W	38.735	-27.06	WGS84	6	10	2016-08-26	Day/Night	Pitfall	sample 08	na	Pimentel, C.	3			2	5	Animalia	Arthropoda	Insecta	Dermaptera	Anisolabididae	Euborellia	annulipes		Euborellia annulipes	(Lucas, 1847)	Euborellia annulipes (Lucas, 1847)	species	INTR	Borges, P. A.V.	2016
DTP Collection_1164	Palearctic	Portugal	Azores	Terceira	Praia da Vitória	Paul da Praia Vitória	Paul da Praia Vitória - Island; PPV-T201	38°44’06.44’’N, 27°03’36.21’’W	38.735	-27.06	WGS84	6	10	2016-08-26	Day/Night	Pitfall	sample 08	na	Pimentel, C.				1	1	Animalia	Arthropoda	Insecta	Dermaptera	Anisolabididae	Euborellia	annulipes		Euborellia annulipes	(Lucas, 1847)	Euborellia annulipes (Lucas, 1847)	species	INTR	Borges, P. A.V.	2016
DTP Collection_1165	Palearctic	Portugal	Azores	Terceira	Praia da Vitória	Paul da Praia Vitória	Paul da Praia Vitória- Margins; PPV-T200	38°44’06.44’’N, 27°03’36.21’’W	38.735	-27.06	WGS84	6	10	2017-08-23	Day/Night	Pitfall	sample 08	na	Pimentel, C.				6	6	Animalia	Arthropoda	Insecta	Dermaptera	Anisolabididae	Euborellia	annulipes		Euborellia annulipes	(Lucas, 1847)	Euborellia annulipes (Lucas, 1847)	species	INTR	Borges, P. A.V.	2017
DTP Collection_1166	Palearctic	Portugal	Azores	Terceira	Praia da Vitória	Paul da Praia Vitória	Paul da Praia Vitória - Island; PPV-T201	38°44’06.44’’N, 27°03’36.21’’W	38.735	-27.06	WGS84	6	10	2017-08-23	Day/Night	Pitfall	sample 08	na	Pimentel, C.				5	5	Animalia	Arthropoda	Insecta	Dermaptera	Anisolabididae	Euborellia	annulipes		Euborellia annulipes	(Lucas, 1847)	Euborellia annulipes (Lucas, 1847)	species	INTR	Borges, P. A.V.	2017
DTP Collection_1167	Palearctic	Portugal	Azores	Terceira	Praia da Vitória	Paul do Belo Jardim	Paul do Belo Jardim - Margins; PBJ-T203	38°42’47.95’’N, 27°03’40.93’’W	38.7134	-27.0616	WGS84	5	10	2017-08-16	Day/Night	Pitfall	sample 08	na	Pimentel, C.				6	6	Animalia	Arthropoda	Insecta	Dermaptera	Anisolabididae	Euborellia	annulipes		Euborellia annulipes	(Lucas, 1847)	Euborellia annulipes (Lucas, 1847)	species	INTR	Borges, P. A.V.	2017
DTP Collection_1311	Palearctic	Portugal	Azores	Terceira	Praia da Vitória	Paul da Pedreira	Paul da Pedreira; PPCP-T202	38°42’13.09’’N; 27°02’46.37’’W	38.7043	-27.0465	WGS84	3	10	2016-08-30	Day/Night	Pitfall	sample 07	na	Pimentel, C.				3	3	Animalia	Arthropoda	Insecta	Dermaptera	Anisolabididae	Euborellia	annulipes		Euborellia annulipes	(Lucas, 1847)	Euborellia annulipes (Lucas, 1847)	species	INTR	Borges, P. A.V.	2016
DTP Collection_1312	Palearctic	Portugal	Azores	Terceira	Praia da Vitória	Paul da Praia Vitória	Paul da Praia Vitória- Margins; PPV-T200	38°44’06.44’’N, 27°03’36.21’’W	38.735	-27.06	WGS84	6	10	2016-08-26	Day/Night	Pitfall	sample 07	na	Pimentel, C.				1	1	Animalia	Arthropoda	Insecta	Dermaptera	Anisolabididae	Euborellia	annulipes		Euborellia annulipes	(Lucas, 1847)	Euborellia annulipes (Lucas, 1847)	species	INTR	Borges, P. A.V.	2016
DTP Collection_1313	Palearctic	Portugal	Azores	Terceira	Praia da Vitória	Paul da Praia Vitória	Paul da Praia Vitória - Island; PPV-T201	38°44’06.44’’N, 27°03’36.21’’W	38.735	-27.06	WGS84	6	10	2016-08-26	Day/Night	Pitfall	sample 07	na	Pimentel, C.				1	1	Animalia	Arthropoda	Insecta	Dermaptera	Anisolabididae	Euborellia	annulipes		Euborellia annulipes	(Lucas, 1847)	Euborellia annulipes (Lucas, 1847)	species	INTR	Borges, P. A.V.	2016
DTP Collection_1314	Palearctic	Portugal	Azores	Terceira	Praia da Vitória	Paul da Praia Vitória	Paul da Praia Vitória- Margins; PPV-T200	38°44’06.44’’N, 27°03’36.21’’W	38.735	-27.06	WGS84	6	10	2017-08-23	Day/Night	Pitfall	sample 07	na	Pimentel, C.	1				1	Animalia	Arthropoda	Insecta	Dermaptera	Anisolabididae	Euborellia	annulipes		Euborellia annulipes	(Lucas, 1847)	Euborellia annulipes (Lucas, 1847)	species	INTR	Borges, P. A.V.	2017
DTP Collection_1315	Palearctic	Portugal	Azores	Terceira	Praia da Vitória	Paul da Praia Vitória	Paul da Praia Vitória - Island; PPV-T201	38°44’06.44’’N, 27°03’36.21’’W	38.735	-27.06	WGS84	6	10	2017-08-23	Day/Night	Pitfall	sample 07	na	Pimentel, C.			1	11	12	Animalia	Arthropoda	Insecta	Dermaptera	Anisolabididae	Euborellia	annulipes		Euborellia annulipes	(Lucas, 1847)	Euborellia annulipes (Lucas, 1847)	species	INTR	Borges, P. A.V.	2017
DTP Collection_1316	Palearctic	Portugal	Azores	Terceira	Praia da Vitória	Paul do Belo Jardim	Paul do Belo Jardim - Margins; PBJ-T203	38°42’47.95’’N, 27°03’40.93’’W	38.7134	-27.0616	WGS84	5	10	2017-08-16	Day/Night	Pitfall	sample 07	na	Pimentel, C.				1	1	Animalia	Arthropoda	Insecta	Dermaptera	Anisolabididae	Euborellia	annulipes		Euborellia annulipes	(Lucas, 1847)	Euborellia annulipes (Lucas, 1847)	species	INTR	Borges, P. A.V.	2017
DTP Collection_1468	Palearctic	Portugal	Azores	Terceira	Praia da Vitória	Paul da Pedreira	Paul da Pedreira; PPCP-T202	38°42’13.09’’N; 27°02’46.37’’W	38.7043	-27.0465	WGS84	3	10	2016-08-30	Day/Night	Pitfall	sample 06	na	Pimentel, C.			1	8	9	Animalia	Arthropoda	Insecta	Dermaptera	Anisolabididae	Euborellia	annulipes		Euborellia annulipes	(Lucas, 1847)	Euborellia annulipes (Lucas, 1847)	species	INTR	Borges, P. A.V.	2016
DTP Collection_1469	Palearctic	Portugal	Azores	Terceira	Praia da Vitória	Paul da Praia Vitória	Paul da Praia Vitória- Margins; PPV-T200	38°44’06.44’’N, 27°03’36.21’’W	38.735	-27.06	WGS84	6	10	2016-08-26	Day/Night	Pitfall	sample 06	na	Pimentel, C.				1	1	Animalia	Arthropoda	Insecta	Dermaptera	Anisolabididae	Euborellia	annulipes		Euborellia annulipes	(Lucas, 1847)	Euborellia annulipes (Lucas, 1847)	species	INTR	Borges, P. A.V.	2016
DTP Collection_1470	Palearctic	Portugal	Azores	Terceira	Praia da Vitória	Paul da Praia Vitória	Paul da Praia Vitória- Margins; PPV-T200	38°44’06.44’’N, 27°03’36.21’’W	38.735	-27.06	WGS84	6	10	2017-08-23	Day/Night	Pitfall	sample 06	na	Pimentel, C.				5	5	Animalia	Arthropoda	Insecta	Dermaptera	Anisolabididae	Euborellia	annulipes		Euborellia annulipes	(Lucas, 1847)	Euborellia annulipes (Lucas, 1847)	species	INTR	Borges, P. A.V.	2017
DTP Collection_1471	Palearctic	Portugal	Azores	Terceira	Praia da Vitória	Paul da Praia Vitória	Paul da Praia Vitória - Island; PPV-T201	38°44’06.44’’N, 27°03’36.21’’W	38.735	-27.06	WGS84	6	10	2017-08-23	Day/Night	Pitfall	sample 06	na	Pimentel, C.				2	2	Animalia	Arthropoda	Insecta	Dermaptera	Anisolabididae	Euborellia	annulipes		Euborellia annulipes	(Lucas, 1847)	Euborellia annulipes (Lucas, 1847)	species	INTR	Borges, P. A.V.	2017
DTP Collection_1472	Palearctic	Portugal	Azores	Terceira	Praia da Vitória	Paul do Belo Jardim	Paul do Belo Jardim - Margins; PBJ-T203	38°42’47.95’’N, 27°03’40.93’’W	38.7134	-27.0616	WGS84	5	10	2017-08-16	Day/Night	Pitfall	sample 06	na	Pimentel, C.	2				2	Animalia	Arthropoda	Insecta	Dermaptera	Anisolabididae	Euborellia	annulipes		Euborellia annulipes	(Lucas, 1847)	Euborellia annulipes (Lucas, 1847)	species	INTR	Borges, P. A.V.	2017
DTP Collection_1645	Palearctic	Portugal	Azores	Terceira	Praia da Vitória	Paul da Pedreira	Paul da Pedreira; PPCP-T202	38°42’13.09’’N; 27°02’46.37’’W	38.7043	-27.0465	WGS84	3	10	2016-08-30	Day/Night	Pitfall	sample 05	na	Pimentel, C.				2	2	Animalia	Arthropoda	Insecta	Dermaptera	Anisolabididae	Euborellia	annulipes		Euborellia annulipes	(Lucas, 1847)	Euborellia annulipes (Lucas, 1847)	species	INTR	Borges, P. A.V.	2016
DTP Collection_1646	Palearctic	Portugal	Azores	Terceira	Praia da Vitória	Paul da Praia Vitória	Paul da Praia Vitória- Margins; PPV-T200	38°44’06.44’’N, 27°03’36.21’’W	38.735	-27.06	WGS84	6	10	2016-08-26	Day/Night	Pitfall	sample 05	na	Pimentel, C.				2	2	Animalia	Arthropoda	Insecta	Dermaptera	Anisolabididae	Euborellia	annulipes		Euborellia annulipes	(Lucas, 1847)	Euborellia annulipes (Lucas, 1847)	species	INTR	Borges, P. A.V.	2016
DTP Collection_1647	Palearctic	Portugal	Azores	Terceira	Praia da Vitória	Paul da Praia Vitória	Paul da Praia Vitória- Margins; PPV-T200	38°44’06.44’’N, 27°03’36.21’’W	38.735	-27.06	WGS84	6	10	2016-08-26	Day/Night	Pitfall	sample 05	na	Pimentel, C.				1	1	Animalia	Arthropoda	Insecta	Dermaptera	Anisolabididae	Euborellia	annulipes		Euborellia annulipes	(Lucas, 1847)	Euborellia annulipes (Lucas, 1847)	species	INTR	Borges, P. A.V.	2016
DTP Collection_1648	Palearctic	Portugal	Azores	Terceira	Praia da Vitória	Paul da Praia Vitória	Paul da Praia Vitória- Margins; PPV-T200	38°44’06.44’’N, 27°03’36.21’’W	38.735	-27.06	WGS84	6	10	2017-08-23	Day/Night	Pitfall	sample 05	na	Pimentel, C.	4			3	7	Animalia	Arthropoda	Insecta	Dermaptera	Anisolabididae	Euborellia	annulipes		Euborellia annulipes	(Lucas, 1847)	Euborellia annulipes (Lucas, 1847)	species	INTR	Borges, P. A.V.	2017
DTP Collection_1649	Palearctic	Portugal	Azores	Terceira	Praia da Vitória	Paul da Praia Vitória	Paul da Praia Vitória- Margins; PPV-T200	38°44’06.44’’N, 27°03’36.21’’W	38.735	-27.06	WGS84	6	10	2017-08-23	Day/Night	Pitfall	sample 05	na	Pimentel, C.				3	3	Animalia	Arthropoda	Insecta	Dermaptera	Anisolabididae	Euborellia	annulipes		Euborellia annulipes	(Lucas, 1847)	Euborellia annulipes (Lucas, 1847)	species	INTR	Borges, P. A.V.	2017
DTP Collection_1650	Palearctic	Portugal	Azores	Terceira	Praia da Vitória	Paul do Belo Jardim	Paul do Belo Jardim - Margins; PBJ-T203	38°42’47.95’’N, 27°03’40.93’’W	38.7134	-27.0616	WGS84	5	10	2017-08-16	Day/Night	Pitfall	sample 05	na	Pimentel, C.	1				1	Animalia	Arthropoda	Insecta	Dermaptera	Anisolabididae	Euborellia	annulipes		Euborellia annulipes	(Lucas, 1847)	Euborellia annulipes (Lucas, 1847)	species	INTR	Borges, P. A.V.	2017
DTP Collection_1883	Palearctic	Portugal	Azores	Terceira	Praia da Vitória	Paul da Pedreira	Paul da Pedreira; PPCP-T202	38°42’13.09’’N; 27°02’46.37’’W	38.7043	-27.0465	WGS84	3	10	2016-08-30	Day/Night	Pitfall	sample 04	na	Pimentel, C.		1	1		2	Animalia	Arthropoda	Insecta	Dermaptera	Anisolabididae	Euborellia	annulipes		Euborellia annulipes	(Lucas, 1847)	Euborellia annulipes (Lucas, 1847)	species	INTR	Borges, P. A.V.	2016
DTP Collection_1884	Palearctic	Portugal	Azores	Terceira	Praia da Vitória	Paul da Pedreira	Paul da Pedreira; PPCP-T202	38°42’13.09’’N; 27°02’46.37’’W	38.7043	-27.0465	WGS84	3	10	2016-08-31	Night	Active aerial searching	sample 04	na	Pimentel, C.				1	1	Animalia	Arthropoda	Insecta	Dermaptera	Anisolabididae	Euborellia	annulipes		Euborellia annulipes	(Lucas, 1847)	Euborellia annulipes (Lucas, 1847)	species	INTR	Borges, P. A.V.	2016
DTP Collection_1885	Palearctic	Portugal	Azores	Terceira	Praia da Vitória	Paul da Praia Vitória	Paul da Praia Vitória- Margins; PPV-T200	38°44’06.44’’N, 27°03’36.21’’W	38.735	-27.06	WGS84	6	10	2017-08-23	Day/Night	Pitfall	sample 04	na	Pimentel, C.			1	1	2	Animalia	Arthropoda	Insecta	Dermaptera	Anisolabididae	Euborellia	annulipes		Euborellia annulipes	(Lucas, 1847)	Euborellia annulipes (Lucas, 1847)	species	INTR	Borges, P. A.V.	2017
DTP Collection_1886	Palearctic	Portugal	Azores	Terceira	Praia da Vitória	Paul da Praia Vitória	Paul da Praia Vitória - Island; PPV-T201	38°44’06.44’’N, 27°03’36.21’’W	38.735	-27.06	WGS84	6	10	2017-08-23	Day/Night	Pitfall	sample 04	na	Pimentel, C.				4	4	Animalia	Arthropoda	Insecta	Dermaptera	Anisolabididae	Euborellia	annulipes		Euborellia annulipes	(Lucas, 1847)	Euborellia annulipes (Lucas, 1847)	species	INTR	Borges, P. A.V.	2017
DTP Collection_1887	Palearctic	Portugal	Azores	Terceira	Praia da Vitória	Paul do Belo Jardim	Paul do Belo Jardim - Margins; PBJ-T203	38°42’47.95’’N, 27°03’40.93’’W	38.7134	-27.0616	WGS84	5	10	2017-08-16	Day/Night	Pitfall	sample 04	na	Pimentel, C.	1				1	Animalia	Arthropoda	Insecta	Dermaptera	Anisolabididae	Euborellia	annulipes		Euborellia annulipes	(Lucas, 1847)	Euborellia annulipes (Lucas, 1847)	species	INTR	Borges, P. A.V.	2017
DTP Collection_1888	Palearctic	Portugal	Azores	Terceira	Praia da Vitória	Paul da Praia Vitória	Paul Praia Vitória - Cerrado São Lazaro; PPV-T205	38°44’06.44’’N, 27°03’36.21’’W	38.735	-27.06	WGS84	6	10	2017-08-23	Day/Night	Pitfall	sample 04	na	Pimentel, C.				1	1	Animalia	Arthropoda	Insecta	Dermaptera	Anisolabididae	Euborellia	annulipes		Euborellia annulipes	(Lucas, 1847)	Euborellia annulipes (Lucas, 1847)	species	INTR	Borges, P. A.V.	2017
DTP Collection_2221	Palearctic	Portugal	Azores	Terceira	Praia da Vitória	Paul da Pedreira	Paul da Pedreira; PPCP-T202	38°42’13.09’’N; 27°02’46.37’’W	38.7043	-27.0465	WGS84	3	10	2016-08-30	Day/Night	Pitfall	sample 03	na	Pimentel, C.		1	1	9	11	Animalia	Arthropoda	Insecta	Dermaptera	Anisolabididae	Euborellia	annulipes		Euborellia annulipes	(Lucas, 1847)	Euborellia annulipes (Lucas, 1847)	species	INTR	Borges, P. A.V.	2016
DTP Collection_2222	Palearctic	Portugal	Azores	Terceira	Praia da Vitória	Paul da Praia Vitória	Paul da Praia Vitória- Margins; PPV-T200	38°44’06.44’’N, 27°03’36.21’’W	38.735	-27.06	WGS84	6	10	2016-08-26	Day/Night	Pitfall	sample 03	na	Pimentel, C.	3			1	4	Animalia	Arthropoda	Insecta	Dermaptera	Anisolabididae	Euborellia	annulipes		Euborellia annulipes	(Lucas, 1847)	Euborellia annulipes (Lucas, 1847)	species	INTR	Borges, P. A.V.	2016
DTP Collection_2223	Palearctic	Portugal	Azores	Terceira	Praia da Vitória	Paul da Praia Vitória	Paul da Praia Vitória- Margins; PPV-T200	38°44’06.44’’N, 27°03’36.21’’W	38.735	-27.06	WGS84	6	10	2016-08-26	Day/Night	Pitfall	sample 03	na	Pimentel, C.	1			5	6	Animalia	Arthropoda	Insecta	Dermaptera	Anisolabididae	Euborellia	annulipes		Euborellia annulipes	(Lucas, 1847)	Euborellia annulipes (Lucas, 1847)	species	INTR	Borges, P. A.V.	2016
DTP Collection_2224	Palearctic	Portugal	Azores	Terceira	Praia da Vitória	Paul da Praia Vitória	Paul da Praia Vitória - Island; PPV-T201	38°44’06.44’’N, 27°03’36.21’’W	38.735	-27.06	WGS84	6	10	2016-08-26	Day/Night	Pitfall	sample 03	na	Pimentel, C.				1	1	Animalia	Arthropoda	Insecta	Dermaptera	Anisolabididae	Euborellia	annulipes		Euborellia annulipes	(Lucas, 1847)	Euborellia annulipes (Lucas, 1847)	species	INTR	Borges, P. A.V.	2016
DTP Collection_2225	Palearctic	Portugal	Azores	Terceira	Praia da Vitória	Paul da Praia Vitória	Paul da Praia Vitória- Margins; PPV-T200	38°44’06.44’’N, 27°03’36.21’’W	38.735	-27.06	WGS84	6	10	2017-08-23	Day/Night	Pitfall	sample 03	na	Pimentel, C.				3	3	Animalia	Arthropoda	Insecta	Dermaptera	Anisolabididae	Euborellia	annulipes		Euborellia annulipes	(Lucas, 1847)	Euborellia annulipes (Lucas, 1847)	species	INTR	Borges, P. A.V.	2017
DTP Collection_2226	Palearctic	Portugal	Azores	Terceira	Praia da Vitória	Paul da Praia Vitória	Paul da Praia Vitória - Island; PPV-T201	38°44’06.44’’N, 27°03’36.21’’W	38.735	-27.06	WGS84	6	10	2017-08-23	Day/Night	Pitfall	sample 03	na	Pimentel, C.				9	9	Animalia	Arthropoda	Insecta	Dermaptera	Anisolabididae	Euborellia	annulipes		Euborellia annulipes	(Lucas, 1847)	Euborellia annulipes (Lucas, 1847)	species	INTR	Borges, P. A.V.	2017
DTP Collection_2227	Palearctic	Portugal	Azores	Terceira	Praia da Vitória	Paul do Belo Jardim	Paul do Belo Jardim - Margins; PBJ-T203	38°42’47.95’’N, 27°03’40.93’’W	38.7134	-27.0616	WGS84	5	10	2017-08-16	Day/Night	Pitfall	sample 03	na	Pimentel, C.	2				2	Animalia	Arthropoda	Insecta	Dermaptera	Anisolabididae	Euborellia	annulipes		Euborellia annulipes	(Lucas, 1847)	Euborellia annulipes (Lucas, 1847)	species	INTR	Borges, P. A.V.	2017
DTP Collection_2589	Palearctic	Portugal	Azores	Terceira	Praia da Vitória	Paul da Pedreira	Paul da Pedreira; PPCP-T202	38°42’13.09’’N; 27°02’46.37’’W	38.7043	-27.0465	WGS84	3	10	2016-08-30	Day/Night	Pitfall	sample 02	na	Pimentel, C.			1	2	3	Animalia	Arthropoda	Insecta	Dermaptera	Anisolabididae	Euborellia	annulipes		Euborellia annulipes	(Lucas, 1847)	Euborellia annulipes (Lucas, 1847)	species	INTR	Borges, P. A.V.	2016
DTP Collection_2590	Palearctic	Portugal	Azores	Terceira	Praia da Vitória	Paul da Praia Vitória	Paul da Praia Vitória- Margins; PPV-T200	38°44’06.44’’N, 27°03’36.21’’W	38.735	-27.06	WGS84	6	10	2016-08-26	Day/Night	Pitfall	sample 02	na	Pimentel, C.				1	1	Animalia	Arthropoda	Insecta	Dermaptera	Anisolabididae	Euborellia	annulipes		Euborellia annulipes	(Lucas, 1847)	Euborellia annulipes (Lucas, 1847)	species	INTR	Borges, P. A.V.	2016
DTP Collection_2591	Palearctic	Portugal	Azores	Terceira	Praia da Vitória	Paul do Belo Jardim	Paul do Belo Jardim - Margins; PBJ-T203	38°42’47.95’’N, 27°03’40.93’’W	38.7134	-27.0616	WGS84	5	10	2016-08-31	Night	Active aerial searching	sample 02	na	Pimentel, C.				3	3	Animalia	Arthropoda	Insecta	Dermaptera	Anisolabididae	Euborellia	annulipes		Euborellia annulipes	(Lucas, 1847)	Euborellia annulipes (Lucas, 1847)	species	INTR	Borges, P. A.V.	2016
DTP Collection_2592	Palearctic	Portugal	Azores	Terceira	Praia da Vitória	Paul da Pedreira	Paul da Pedreira; PPCP-T202	38°42’13.09’’N; 27°02’46.37’’W	38.7043	-27.0465	WGS84	3	10	2016-08-31	Night	Active aerial searching	sample 02	na	Borges, P.A.V.				1	1	Animalia	Arthropoda	Insecta	Dermaptera	Anisolabididae	Euborellia	annulipes		Euborellia annulipes	(Lucas, 1847)	Euborellia annulipes (Lucas, 1847)	species	INTR	Borges, P. A.V.	2016
DTP Collection_2593	Palearctic	Portugal	Azores	Terceira	Praia da Vitória	Paul da Praia Vitória	Paul da Praia Vitória- Margins; PPV-T200	38°44’06.44’’N, 27°03’36.21’’W	38.735	-27.06	WGS84	6	10	2017-08-23	Day/Night	Pitfall	sample 02	na	Pimentel, C.				8	8	Animalia	Arthropoda	Insecta	Dermaptera	Anisolabididae	Euborellia	annulipes		Euborellia annulipes	(Lucas, 1847)	Euborellia annulipes (Lucas, 1847)	species	INTR	Borges, P. A.V.	2017
DTP Collection_2594	Palearctic	Portugal	Azores	Terceira	Praia da Vitória	Paul da Praia Vitória	Paul da Praia Vitória - Island; PPV-T201	38°44’06.44’’N, 27°03’36.21’’W	38.735	-27.06	WGS84	6	10	2017-08-23	Day/Night	Pitfall	sample 02	na	Pimentel, C.				1	1	Animalia	Arthropoda	Insecta	Dermaptera	Anisolabididae	Euborellia	annulipes		Euborellia annulipes	(Lucas, 1847)	Euborellia annulipes (Lucas, 1847)	species	INTR	Borges, P. A.V.	2017
DTP Collection_2595	Palearctic	Portugal	Azores	Terceira	Praia da Vitória	Paul do Belo Jardim	Paul do Belo Jardim - Margins; PBJ-T203	38°42’47.95’’N, 27°03’40.93’’W	38.7134	-27.0616	WGS84	5	10	2017-08-30	Night	Beating	sample 02	na	Pimentel, C.				1	1	Animalia	Arthropoda	Insecta	Dermaptera	Anisolabididae	Euborellia	annulipes		Euborellia annulipes	(Lucas, 1847)	Euborellia annulipes (Lucas, 1847)	species	INTR	Borges, P. A.V.	2017
DTP Collection_2986	Palearctic	Portugal	Azores	Terceira	Praia da Vitória	Paul da Pedreira	Paul da Pedreira; PPCP-T202	38°42’13.09’’N; 27°02’46.37’’W	38.7043	-27.0465	WGS84	3	10	2016-08-30	Day/Night	Pitfall	sample 01	na	Pimentel, C.			1	5	6	Animalia	Arthropoda	Insecta	Dermaptera	Anisolabididae	Euborellia	annulipes		Euborellia annulipes	(Lucas, 1847)	Euborellia annulipes (Lucas, 1847)	species	INTR	Borges, P. A.V.	2016
DTP Collection_2987	Palearctic	Portugal	Azores	Terceira	Praia da Vitória	Paul da Praia Vitória	Paul da Praia Vitória- Margins; PPV-T200	38°44’06.44’’N, 27°03’36.21’’W	38.735	-27.06	WGS84	6	10	2016-08-26	Day/Night	Pitfall	sample 01	na	Pimentel, C.			1	1	2	Animalia	Arthropoda	Insecta	Dermaptera	Anisolabididae	Euborellia	annulipes		Euborellia annulipes	(Lucas, 1847)	Euborellia annulipes (Lucas, 1847)	species	INTR	Borges, P. A.V.	2016
DTP Collection_2988	Palearctic	Portugal	Azores	Terceira	Praia da Vitória	Paul da Praia Vitória	Paul da Praia Vitória- Margins; PPV-T200	38°44’06.44’’N, 27°03’36.21’’W	38.735	-27.06	WGS84	6	10	2016-08-26	Day/Night	Pitfall	sample 01	na	Pimentel, C.				8	8	Animalia	Arthropoda	Insecta	Dermaptera	Anisolabididae	Euborellia	annulipes		Euborellia annulipes	(Lucas, 1847)	Euborellia annulipes (Lucas, 1847)	species	INTR	Borges, P. A.V.	2016
DTP Collection_2989	Palearctic	Portugal	Azores	Terceira	Praia da Vitória	Paul da Praia Vitória	Paul da Praia Vitória - Island; PPV-T201	38°44’06.44’’N, 27°03’36.21’’W	38.735	-27.06	WGS84	6	10	2016-08-26	Day/Night	Pitfall	sample 01	na	Pimentel, C.				1	1	Animalia	Arthropoda	Insecta	Dermaptera	Anisolabididae	Euborellia	annulipes		Euborellia annulipes	(Lucas, 1847)	Euborellia annulipes (Lucas, 1847)	species	INTR	Borges, P. A.V.	2016
DTP Collection_2990	Palearctic	Portugal	Azores	Terceira	Praia da Vitória	Paul do Belo Jardim	Paul do Belo Jardim - Margins; PBJ-T203	38°42’47.95’’N, 27°03’40.93’’W	38.7134	-27.0616	WGS84	5	10	2016-08-31	Night	Active aerial searching	sample 01	na	Brito, M.			1		1	Animalia	Arthropoda	Insecta	Dermaptera	Anisolabididae	Euborellia	annulipes		Euborellia annulipes	(Lucas, 1847)	Euborellia annulipes (Lucas, 1847)	species	INTR	Borges, P. A.V.	2016
DTP Collection_2991	Palearctic	Portugal	Azores	Terceira	Praia da Vitória	Paul da Praia Vitória	Paul da Praia Vitória - Island; PPV-T201	38°44’06.44’’N, 27°03’36.21’’W	38.735	-27.06	WGS84	6	10	2017-08-23	Day/Night	Pitfall	sample 01	na	Pimentel, C.				3	3	Animalia	Arthropoda	Insecta	Dermaptera	Anisolabididae	Euborellia	annulipes		Euborellia annulipes	(Lucas, 1847)	Euborellia annulipes (Lucas, 1847)	species	INTR	Borges, P. A.V.	2017
DTP Collection_2992	Palearctic	Portugal	Azores	Terceira	Praia da Vitória	Paul da Praia Vitória	Paul Praia Vitória - Cerrado São Lazaro; PPV-T205	38°44’06.44’’N, 27°03’36.21’’W	38.735	-27.06	WGS84	6	10	2017-08-23	Day/Night	Pitfall	sample 01	na	Pimentel, C.				6	6	Animalia	Arthropoda	Insecta	Dermaptera	Anisolabididae	Euborellia	annulipes		Euborellia annulipes	(Lucas, 1847)	Euborellia annulipes (Lucas, 1847)	species	INTR	Borges, P. A.V.	2017
DTP Collection_51	Palearctic	Portugal	Azores	Terceira	Praia da Vitória	Paul do Belo Jardim	Paul do Belo Jardim - Margins; PBJ-T203	38°42’47.95’’N, 27°03’40.93’’W	38.7134	-27.0616	WGS84	5	10	2016-09-07	Day/Night	Pitfall	sample 30	na	Pimentel, C.				1	1	Animalia	Arthropoda	Insecta	Orthoptera	Gryllidae	Eumodicogryllus	bordigalensis		Eumodicogryllus bordigalensis	(Latreille, 1804)	Eumodicogryllus bordigalensis (Latreille, 1804)	species	INTR	Borges, P. A.V.	2016
DTP Collection_52	Palearctic	Portugal	Azores	Terceira	Praia da Vitória	Paul do Belo Jardim	Paul do Belo Jardim - Margins; PBJ-T203	38°42’47.95’’N, 27°03’40.93’’W	38.7134	-27.0616	WGS84	5	10	2017-08-16	Day/Night	Pitfall	sample 30	na	Pimentel, C.	1				1	Animalia	Arthropoda	Insecta	Orthoptera	Gryllidae	Eumodicogryllus	bordigalensis		Eumodicogryllus bordigalensis	(Latreille, 1804)	Eumodicogryllus bordigalensis (Latreille, 1804)	species	INTR	Borges, P. A.V.	2017
DTP Collection_89	Palearctic	Portugal	Azores	Terceira	Praia da Vitória	Paul do Belo Jardim	Paul do Belo Jardim - Margins; PBJ-T203	38°42’47.95’’N, 27°03’40.93’’W	38.7134	-27.0616	WGS84	5	10	2016-09-07	Day/Night	Pitfall	sample 29	na	Pimentel, C.				1	1	Animalia	Arthropoda	Insecta	Orthoptera	Gryllidae	Eumodicogryllus	bordigalensis		Eumodicogryllus bordigalensis	(Latreille, 1804)	Eumodicogryllus bordigalensis (Latreille, 1804)	species	INTR	Borges, P. A.V.	2016
DTP Collection_120	Palearctic	Portugal	Azores	Terceira	Praia da Vitória	Paul da Pedreira	Paul da Pedreira; PPCP-T202	38°42’13.09’’N; 27°02’46.37’’W	38.7043	-27.0465	WGS84	3	10	2016-08-30	Day/Night	Pitfall	sample 28	na	Pimentel, C.				1	1	Animalia	Arthropoda	Insecta	Orthoptera	Gryllidae	Eumodicogryllus	bordigalensis		Eumodicogryllus bordigalensis	(Latreille, 1804)	Eumodicogryllus bordigalensis (Latreille, 1804)	species	INTR	Borges, P. A.V.	2016
DTP Collection_121	Palearctic	Portugal	Azores	Terceira	Praia da Vitória	Paul do Belo Jardim	Paul do Belo Jardim - Margins; PBJ-T203	38°42’47.95’’N, 27°03’40.93’’W	38.7134	-27.0616	WGS84	5	10	2016-09-07	Day/Night	Pitfall	sample 28	na	Pimentel, C.				13	13	Animalia	Arthropoda	Insecta	Orthoptera	Gryllidae	Eumodicogryllus	bordigalensis		Eumodicogryllus bordigalensis	(Latreille, 1804)	Eumodicogryllus bordigalensis (Latreille, 1804)	species	INTR	Borges, P. A.V.	2016
DTP Collection_122	Palearctic	Portugal	Azores	Terceira	Praia da Vitória	Paul da Pedreira	Paul da Pedreira; PPCP-T202	38°42’13.09’’N; 27°02’46.37’’W	38.7043	-27.0465	WGS84	3	10	2017-06-30	Day/Night	Pitfall	sample 28	na	Pimentel, C.				1	1	Animalia	Arthropoda	Insecta	Orthoptera	Gryllidae	Eumodicogryllus	bordigalensis		Eumodicogryllus bordigalensis	(Latreille, 1804)	Eumodicogryllus bordigalensis (Latreille, 1804)	species	INTR	Borges, P. A.V.	2017
DTP Collection_148	Palearctic	Portugal	Azores	Terceira	Praia da Vitória	Paul da Pedreira	Paul da Pedreira; PPCP-T202	38°42’13.09’’N; 27°02’46.37’’W	38.7043	-27.0465	WGS84	3	10	2016-08-30	Day/Night	Pitfall	sample 27	na	Pimentel, C.				2	2	Animalia	Arthropoda	Insecta	Orthoptera	Gryllidae	Eumodicogryllus	bordigalensis		Eumodicogryllus bordigalensis	(Latreille, 1804)	Eumodicogryllus bordigalensis (Latreille, 1804)	species	INTR	Borges, P. A.V.	2016
DTP Collection_180	Palearctic	Portugal	Azores	Terceira	Praia da Vitória	Paul do Belo Jardim	Paul do Belo Jardim - Margins; PBJ-T203	38°42’47.95’’N, 27°03’40.93’’W	38.7134	-27.0616	WGS84	5	10	2016-09-07	Day/Night	Pitfall	sample 26	na	Pimentel, C.				5	5	Animalia	Arthropoda	Insecta	Orthoptera	Gryllidae	Eumodicogryllus	bordigalensis		Eumodicogryllus bordigalensis	(Latreille, 1804)	Eumodicogryllus bordigalensis (Latreille, 1804)	species	INTR	Borges, P. A.V.	2016
DTP Collection_235	Palearctic	Portugal	Azores	Terceira	Praia da Vitória	Paul do Belo Jardim	Paul do Belo Jardim - Margins; PBJ-T203	38°42’47.95’’N, 27°03’40.93’’W	38.7134	-27.0616	WGS84	5	10	2016-09-07	Day/Night	Pitfall	sample 24	na	Pimentel, C.				7	7	Animalia	Arthropoda	Insecta	Orthoptera	Gryllidae	Eumodicogryllus	bordigalensis		Eumodicogryllus bordigalensis	(Latreille, 1804)	Eumodicogryllus bordigalensis (Latreille, 1804)	species	INTR	Borges, P. A.V.	2016
DTP Collection_268	Palearctic	Portugal	Azores	Terceira	Praia da Vitória	Paul da Pedreira	Paul da Pedreira; PPCP-T202	38°42’13.09’’N; 27°02’46.37’’W	38.7043	-27.0465	WGS84	3	10	2016-08-30	Day/Night	Pitfall	sample 23	na	Pimentel, C.				2	2	Animalia	Arthropoda	Insecta	Orthoptera	Gryllidae	Eumodicogryllus	bordigalensis		Eumodicogryllus bordigalensis	(Latreille, 1804)	Eumodicogryllus bordigalensis (Latreille, 1804)	species	INTR	Borges, P. A.V.	2016
DTP Collection_299	Palearctic	Portugal	Azores	Terceira	Praia da Vitória	Paul do Belo Jardim	Paul do Belo Jardim - Margins; PBJ-T203	38°42’47.95’’N, 27°03’40.93’’W	38.7134	-27.0616	WGS84	5	10	2016-09-07	Day/Night	Pitfall	sample 22	na	Pimentel, C.				1	1	Animalia	Arthropoda	Insecta	Orthoptera	Gryllidae	Eumodicogryllus	bordigalensis		Eumodicogryllus bordigalensis	(Latreille, 1804)	Eumodicogryllus bordigalensis (Latreille, 1804)	species	INTR	Borges, P. A.V.	2016
DTP Collection_300	Palearctic	Portugal	Azores	Terceira	Praia da Vitória	Paul da Pedreira	Paul da Pedreira; PPCP-T202	38°42’13.09’’N; 27°02’46.37’’W	38.7043	-27.0465	WGS84	3	10	2017-06-30	Day/Night	Pitfall	sample 22	na	Pimentel, C.				1	1	Animalia	Arthropoda	Insecta	Orthoptera	Gryllidae	Eumodicogryllus	bordigalensis		Eumodicogryllus bordigalensis	(Latreille, 1804)	Eumodicogryllus bordigalensis (Latreille, 1804)	species	INTR	Borges, P. A.V.	2017
DTP Collection_301	Palearctic	Portugal	Azores	Terceira	Praia da Vitória	Paul da Pedreira	Paul da Pedreira; PPCP-T202	38°42’13.09’’N; 27°02’46.37’’W	38.7043	-27.0465	WGS84	3	10	2017-06-30	Day/Night	Pitfall	sample 22	na	Pimentel, C.	1				1	Animalia	Arthropoda	Insecta	Orthoptera	Gryllidae	Eumodicogryllus	bordigalensis		Eumodicogryllus bordigalensis	(Latreille, 1804)	Eumodicogryllus bordigalensis (Latreille, 1804)	species	INTR	Borges, P. A.V.	2017
DTP Collection_332	Palearctic	Portugal	Azores	Terceira	Praia da Vitória	Paul do Belo Jardim	Paul do Belo Jardim - Margins; PBJ-T203	38°42’47.95’’N, 27°03’40.93’’W	38.7134	-27.0616	WGS84	5	10	2016-09-07	Day/Night	Pitfall	sample 21	na	Pimentel, C.				7	7	Animalia	Arthropoda	Insecta	Orthoptera	Gryllidae	Eumodicogryllus	bordigalensis		Eumodicogryllus bordigalensis	(Latreille, 1804)	Eumodicogryllus bordigalensis (Latreille, 1804)	species	INTR	Borges, P. A.V.	2016
DTP Collection_333	Palearctic	Portugal	Azores	Terceira	Praia da Vitória	Paul da Pedreira	Paul da Pedreira; PPCP-T202	38°42’13.09’’N; 27°02’46.37’’W	38.7043	-27.0465	WGS84	3	10	2017-06-30	Day/Night	Pitfall	sample 21	na	Pimentel, C.	1				1	Animalia	Arthropoda	Insecta	Orthoptera	Gryllidae	Eumodicogryllus	bordigalensis		Eumodicogryllus bordigalensis	(Latreille, 1804)	Eumodicogryllus bordigalensis (Latreille, 1804)	species	INTR	Borges, P. A.V.	2017
DTP Collection_361	Palearctic	Portugal	Azores	Terceira	Praia da Vitória	Paul da Pedreira	Paul da Pedreira; PPCP-T202	38°42’13.09’’N; 27°02’46.37’’W	38.7043	-27.0465	WGS84	3	10	2016-08-30	Day/Night	Pitfall	sample 20	na	Pimentel, C.				1	1	Animalia	Arthropoda	Insecta	Orthoptera	Gryllidae	Eumodicogryllus	bordigalensis		Eumodicogryllus bordigalensis	(Latreille, 1804)	Eumodicogryllus bordigalensis (Latreille, 1804)	species	INTR	Borges, P. A.V.	2016
DTP Collection_362	Palearctic	Portugal	Azores	Terceira	Praia da Vitória	Paul do Belo Jardim	Paul do Belo Jardim - Margins; PBJ-T203	38°42’47.95’’N, 27°03’40.93’’W	38.7134	-27.0616	WGS84	5	10	2017-08-16	Day/Night	Pitfall	sample 20	na	Pimentel, C.				1	1	Animalia	Arthropoda	Insecta	Orthoptera	Gryllidae	Eumodicogryllus	bordigalensis		Eumodicogryllus bordigalensis	(Latreille, 1804)	Eumodicogryllus bordigalensis (Latreille, 1804)	species	INTR	Borges, P. A.V.	2017
DTP Collection_393	Palearctic	Portugal	Azores	Terceira	Praia da Vitória	Paul da Pedreira	Paul da Pedreira; PPCP-T202	38°42’13.09’’N; 27°02’46.37’’W	38.7043	-27.0465	WGS84	3	10	2016-08-30	Day/Night	Pitfall	sample 19	na	Pimentel, C.				1	1	Animalia	Arthropoda	Insecta	Orthoptera	Gryllidae	Eumodicogryllus	bordigalensis		Eumodicogryllus bordigalensis	(Latreille, 1804)	Eumodicogryllus bordigalensis (Latreille, 1804)	species	INTR	Borges, P. A.V.	2016
DTP Collection_424	Palearctic	Portugal	Azores	Terceira	Praia da Vitória	Paul da Pedreira	Paul da Pedreira; PPCP-T202	38°42’13.09’’N; 27°02’46.37’’W	38.7043	-27.0465	WGS84	3	10	2016-08-30	Day/Night	Pitfall	sample 18	na	Pimentel, C.				2	2	Animalia	Arthropoda	Insecta	Orthoptera	Gryllidae	Eumodicogryllus	bordigalensis		Eumodicogryllus bordigalensis	(Latreille, 1804)	Eumodicogryllus bordigalensis (Latreille, 1804)	species	INTR	Borges, P. A.V.	2016
DTP Collection_455	Palearctic	Portugal	Azores	Terceira	Praia da Vitória	Paul do Belo Jardim	Paul do Belo Jardim - Margins; PBJ-T203	38°42’47.95’’N, 27°03’40.93’’W	38.7134	-27.0616	WGS84	5	10	2016-09-07	Day/Night	Pitfall	sample 17	na	Pimentel, C.	1			2	3	Animalia	Arthropoda	Insecta	Orthoptera	Gryllidae	Eumodicogryllus	bordigalensis		Eumodicogryllus bordigalensis	(Latreille, 1804)	Eumodicogryllus bordigalensis (Latreille, 1804)	species	INTR	Borges, P. A.V.	2016
DTP Collection_490	Palearctic	Portugal	Azores	Terceira	Praia da Vitória	Paul do Belo Jardim	Paul do Belo Jardim - Margins; PBJ-T203	38°42’47.95’’N, 27°03’40.93’’W	38.7134	-27.0616	WGS84	5	10	2016-09-07	Day/Night	Pitfall	sample 16	na	Pimentel, C.				4	4	Animalia	Arthropoda	Insecta	Orthoptera	Gryllidae	Eumodicogryllus	bordigalensis		Eumodicogryllus bordigalensis	(Latreille, 1804)	Eumodicogryllus bordigalensis (Latreille, 1804)	species	INTR	Borges, P. A.V.	2016
DTP Collection_527	Palearctic	Portugal	Azores	Terceira	Praia da Vitória	Paul do Belo Jardim	Paul do Belo Jardim - Margins; PBJ-T203	38°42’47.95’’N, 27°03’40.93’’W	38.7134	-27.0616	WGS84	5	10	2016-09-07	Day/Night	Pitfall	sample 15	na	Pimentel, C.				7	7	Animalia	Arthropoda	Insecta	Orthoptera	Gryllidae	Eumodicogryllus	bordigalensis		Eumodicogryllus bordigalensis	(Latreille, 1804)	Eumodicogryllus bordigalensis (Latreille, 1804)	species	INTR	Borges, P. A.V.	2016
DTP Collection_528	Palearctic	Portugal	Azores	Terceira	Praia da Vitória	Paul do Belo Jardim	Paul do Belo Jardim - Stream; PBJ-T204	38°42’47.95’’N, 27°03’40.93’’W	38.7134	-27.0616	WGS84	5	10	2016-09-07	Day/Night	Pitfall	sample 15	na	Pimentel, C.				6	6	Animalia	Arthropoda	Insecta	Orthoptera	Gryllidae	Eumodicogryllus	bordigalensis		Eumodicogryllus bordigalensis	(Latreille, 1804)	Eumodicogryllus bordigalensis (Latreille, 1804)	species	INTR	Borges, P. A.V.	2016
DTP Collection_566	Palearctic	Portugal	Azores	Terceira	Praia da Vitória	Paul do Belo Jardim	Paul do Belo Jardim - Stream; PBJ-T204	38°42’47.95’’N, 27°03’40.93’’W	38.7134	-27.0616	WGS84	5	10	2016-09-07	Day/Night	Pitfall	sample 14	na	Pimentel, C.				2	2	Animalia	Arthropoda	Insecta	Orthoptera	Gryllidae	Eumodicogryllus	bordigalensis		Eumodicogryllus bordigalensis	(Latreille, 1804)	Eumodicogryllus bordigalensis (Latreille, 1804)	species	INTR	Borges, P. A.V.	2016
DTP Collection_606	Palearctic	Portugal	Azores	Terceira	Praia da Vitória	Paul do Belo Jardim	Paul do Belo Jardim - Stream; PBJ-T204	38°42’47.95’’N, 27°03’40.93’’W	38.7134	-27.0616	WGS84	5	10	2016-09-07	Day/Night	Pitfall	sample 13	na	Pimentel, C.				3	3	Animalia	Arthropoda	Insecta	Orthoptera	Gryllidae	Eumodicogryllus	bordigalensis		Eumodicogryllus bordigalensis	(Latreille, 1804)	Eumodicogryllus bordigalensis (Latreille, 1804)	species	INTR	Borges, P. A.V.	2016
DTP Collection_660	Palearctic	Portugal	Azores	Terceira	Praia da Vitória	Paul do Belo Jardim	Paul do Belo Jardim - Stream; PBJ-T204	38°42’47.95’’N, 27°03’40.93’’W	38.7134	-27.0616	WGS84	5	10	2016-09-07	Day/Night	Pitfall	sample 12	na	Pimentel, C.				4	4	Animalia	Arthropoda	Insecta	Orthoptera	Gryllidae	Eumodicogryllus	bordigalensis		Eumodicogryllus bordigalensis	(Latreille, 1804)	Eumodicogryllus bordigalensis (Latreille, 1804)	species	INTR	Borges, P. A.V.	2016
DTP Collection_718	Palearctic	Portugal	Azores	Terceira	Praia da Vitória	Paul da Pedreira	Paul da Pedreira; PPCP-T202	38°42’13.09’’N; 27°02’46.37’’W	38.7043	-27.0465	WGS84	3	10	2016-08-30	Day/Night	Pitfall	sample 11	na	Pimentel, C.				3	3	Animalia	Arthropoda	Insecta	Orthoptera	Gryllidae	Eumodicogryllus	bordigalensis		Eumodicogryllus bordigalensis	(Latreille, 1804)	Eumodicogryllus bordigalensis (Latreille, 1804)	species	INTR	Borges, P. A.V.	2016
DTP Collection_719	Palearctic	Portugal	Azores	Terceira	Praia da Vitória	Paul do Belo Jardim	Paul do Belo Jardim - Stream; PBJ-T204	38°42’47.95’’N, 27°03’40.93’’W	38.7134	-27.0616	WGS84	5	10	2016-09-07	Day/Night	Pitfall	sample 11	na	Pimentel, C.				4	4	Animalia	Arthropoda	Insecta	Orthoptera	Gryllidae	Eumodicogryllus	bordigalensis		Eumodicogryllus bordigalensis	(Latreille, 1804)	Eumodicogryllus bordigalensis (Latreille, 1804)	species	INTR	Borges, P. A.V.	2016
DTP Collection_817	Palearctic	Portugal	Azores	Terceira	Praia da Vitória	Paul do Belo Jardim	Paul do Belo Jardim - Stream; PBJ-T204	38°42’47.95’’N, 27°03’40.93’’W	38.7134	-27.0616	WGS84	5	10	2016-09-07	Day/Night	Pitfall	sample 10	na	Pimentel, C.				6	6	Animalia	Arthropoda	Insecta	Orthoptera	Gryllidae	Eumodicogryllus	bordigalensis		Eumodicogryllus bordigalensis	(Latreille, 1804)	Eumodicogryllus bordigalensis (Latreille, 1804)	species	INTR	Borges, P. A.V.	2016
DTP Collection_1001	Palearctic	Portugal	Azores	Terceira	Praia da Vitória	Paul do Belo Jardim	Paul do Belo Jardim - Margins; PBJ-T203	38°42’47.95’’N, 27°03’40.93’’W	38.7134	-27.0616	WGS84	5	10	2016-09-07	Day/Night	Pitfall	sample 09	na	Pimentel, C.				4	4	Animalia	Arthropoda	Insecta	Orthoptera	Gryllidae	Eumodicogryllus	bordigalensis		Eumodicogryllus bordigalensis	(Latreille, 1804)	Eumodicogryllus bordigalensis (Latreille, 1804)	species	INTR	Borges, P. A.V.	2016
DTP Collection_1002	Palearctic	Portugal	Azores	Terceira	Praia da Vitória	Paul do Belo Jardim	Paul do Belo Jardim - Stream; PBJ-T204	38°42’47.95’’N, 27°03’40.93’’W	38.7134	-27.0616	WGS84	5	10	2016-09-07	Day/Night	Pitfall	sample 09	na	Pimentel, C.				1	1	Animalia	Arthropoda	Insecta	Orthoptera	Gryllidae	Eumodicogryllus	bordigalensis		Eumodicogryllus bordigalensis	(Latreille, 1804)	Eumodicogryllus bordigalensis (Latreille, 1804)	species	INTR	Borges, P. A.V.	2016
DTP Collection_1172	Palearctic	Portugal	Azores	Terceira	Praia da Vitória	Paul do Belo Jardim	Paul do Belo Jardim - Stream; PBJ-T204	38°42’47.95’’N, 27°03’40.93’’W	38.7134	-27.0616	WGS84	5	10	2016-09-07	Day/Night	Pitfall	sample 08	na	Pimentel, C.				3	3	Animalia	Arthropoda	Insecta	Orthoptera	Gryllidae	Eumodicogryllus	bordigalensis		Eumodicogryllus bordigalensis	(Latreille, 1804)	Eumodicogryllus bordigalensis (Latreille, 1804)	species	INTR	Borges, P. A.V.	2016
DTP Collection_1321	Palearctic	Portugal	Azores	Terceira	Praia da Vitória	Paul do Belo Jardim	Paul do Belo Jardim - Stream; PBJ-T204	38°42’47.95’’N, 27°03’40.93’’W	38.7134	-27.0616	WGS84	5	10	2016-09-07	Day/Night	Pitfall	sample 07	na	Pimentel, C.				4	4	Animalia	Arthropoda	Insecta	Orthoptera	Gryllidae	Eumodicogryllus	bordigalensis		Eumodicogryllus bordigalensis	(Latreille, 1804)	Eumodicogryllus bordigalensis (Latreille, 1804)	species	INTR	Borges, P. A.V.	2016
DTP Collection_1476	Palearctic	Portugal	Azores	Terceira	Praia da Vitória	Paul do Belo Jardim	Paul do Belo Jardim - Margins; PBJ-T203	38°42’47.95’’N, 27°03’40.93’’W	38.7134	-27.0616	WGS84	5	10	2016-09-07	Day/Night	Pitfall	sample 06	na	Pimentel, C.				1	1	Animalia	Arthropoda	Insecta	Orthoptera	Gryllidae	Eumodicogryllus	bordigalensis		Eumodicogryllus bordigalensis	(Latreille, 1804)	Eumodicogryllus bordigalensis (Latreille, 1804)	species	INTR	Borges, P. A.V.	2016
DTP Collection_1477	Palearctic	Portugal	Azores	Terceira	Praia da Vitória	Paul do Belo Jardim	Paul do Belo Jardim - Stream; PBJ-T204	38°42’47.95’’N, 27°03’40.93’’W	38.7134	-27.0616	WGS84	5	10	2016-09-07	Day/Night	Pitfall	sample 06	na	Pimentel, C.				14	14	Animalia	Arthropoda	Insecta	Orthoptera	Gryllidae	Eumodicogryllus	bordigalensis		Eumodicogryllus bordigalensis	(Latreille, 1804)	Eumodicogryllus bordigalensis (Latreille, 1804)	species	INTR	Borges, P. A.V.	2016
DTP Collection_1653	Palearctic	Portugal	Azores	Terceira	Praia da Vitória	Paul do Belo Jardim	Paul do Belo Jardim - Margins; PBJ-T203	38°42’47.95’’N, 27°03’40.93’’W	38.7134	-27.0616	WGS84	5	10	2016-09-07	Day/Night	Pitfall	sample 05	na	Pimentel, C.				2	2	Animalia	Arthropoda	Insecta	Orthoptera	Gryllidae	Eumodicogryllus	bordigalensis		Eumodicogryllus bordigalensis	(Latreille, 1804)	Eumodicogryllus bordigalensis (Latreille, 1804)	species	INTR	Borges, P. A.V.	2016
DTP Collection_1654	Palearctic	Portugal	Azores	Terceira	Praia da Vitória	Paul do Belo Jardim	Paul do Belo Jardim - Stream; PBJ-T204	38°42’47.95’’N, 27°03’40.93’’W	38.7134	-27.0616	WGS84	5	10	2016-09-07	Day/Night	Pitfall	sample 05	na	Pimentel, C.	3				3	Animalia	Arthropoda	Insecta	Orthoptera	Gryllidae	Eumodicogryllus	bordigalensis		Eumodicogryllus bordigalensis	(Latreille, 1804)	Eumodicogryllus bordigalensis (Latreille, 1804)	species	INTR	Borges, P. A.V.	2016
DTP Collection_1902	Palearctic	Portugal	Azores	Terceira	Praia da Vitória	Paul do Belo Jardim	Paul do Belo Jardim - Stream; PBJ-T204	38°42’47.95’’N, 27°03’40.93’’W	38.7134	-27.0616	WGS84	5	10	2016-09-07	Day/Night	Pitfall	sample 04	na	Pimentel, C.				15	15	Animalia	Arthropoda	Insecta	Orthoptera	Gryllidae	Eumodicogryllus	bordigalensis		Eumodicogryllus bordigalensis	(Latreille, 1804)	Eumodicogryllus bordigalensis (Latreille, 1804)	species	INTR	Borges, P. A.V.	2016
DTP Collection_1903	Palearctic	Portugal	Azores	Terceira	Praia da Vitória	Paul da Praia Vitória	Paul da Praia Vitória- Margins; PPV-T200	38°44’06.44’’N, 27°03’36.21’’W	38.735	-27.06	WGS84	6	10	2016-08-26	Day/Night	Pitfall	sample 04	na	Pimentel, C.				1	1	Animalia	Arthropoda	Insecta	Orthoptera	Gryllidae	Eumodicogryllus	bordigalensis		Eumodicogryllus bordigalensis	(Latreille, 1804)	Eumodicogryllus bordigalensis (Latreille, 1804)	species	INTR	Borges, P. A.V.	2016
DTP Collection_1904	Palearctic	Portugal	Azores	Terceira	Praia da Vitória	Paul da Praia Vitória	Paul da Praia Vitória- Margins; PPV-T200	38°44’06.44’’N, 27°03’36.21’’W	38.735	-27.06	WGS84	6	10	2017-08-31	Night	Sweeping	sample 04	na	Brito, M.				2	2	Animalia	Arthropoda	Insecta	Orthoptera	Gryllidae	Eumodicogryllus	bordigalensis		Eumodicogryllus bordigalensis	(Latreille, 1804)	Eumodicogryllus bordigalensis (Latreille, 1804)	species	INTR	Borges, P. A.V.	2017
DTP Collection_1905	Palearctic	Portugal	Azores	Terceira	Praia da Vitória	Paul da Pedreira	Paul da Pedreira; PPCP-T202	38°42’13.09’’N; 27°02’46.37’’W	38.7043	-27.0465	WGS84	3	10	2016-06-21	Night	Sweeping	sample 04	na	Gabriel, R.				18	18	Animalia	Arthropoda	Insecta	Orthoptera	Gryllidae	Eumodicogryllus	bordigalensis		Eumodicogryllus bordigalensis	(Latreille, 1804)	Eumodicogryllus bordigalensis (Latreille, 1804)	species	INTR	Borges, P. A.V.	2016
DTP Collection_2235	Palearctic	Portugal	Azores	Terceira	Praia da Vitória	Paul do Belo Jardim	Paul do Belo Jardim - Stream; PBJ-T204	38°42’47.95’’N, 27°03’40.93’’W	38.7134	-27.0616	WGS84	5	10	2016-09-07	Day/Night	Pitfall	sample 03	na	Pimentel, C.				2	2	Animalia	Arthropoda	Insecta	Orthoptera	Gryllidae	Eumodicogryllus	bordigalensis		Eumodicogryllus bordigalensis	(Latreille, 1804)	Eumodicogryllus bordigalensis (Latreille, 1804)	species	INTR	Borges, P. A.V.	2016
DTP Collection_2236	Palearctic	Portugal	Azores	Terceira	Praia da Vitória	Paul da Praia Vitória	Paul da Praia Vitória- Margins; PPV-T200	38°44’06.44’’N, 27°03’36.21’’W	38.735	-27.06	WGS84	6	10	2017-08-31	Night	Sweeping	sample 03	na	Gabriel, R.	1			2	3	Animalia	Arthropoda	Insecta	Orthoptera	Gryllidae	Eumodicogryllus	bordigalensis		Eumodicogryllus bordigalensis	(Latreille, 1804)	Eumodicogryllus bordigalensis (Latreille, 1804)	species	INTR	Borges, P. A.V.	2017
DTP Collection_2237	Palearctic	Portugal	Azores	Terceira	Praia da Vitória	Paul do Belo Jardim	Paul do Belo Jardim - Margins; PBJ-T203	38°42’47.95’’N, 27°03’40.93’’W	38.7134	-27.0616	WGS84	5	10	2017-08-30	Night	Active aerial searching	sample 03	na	Borges, P.A.V.				1	1	Animalia	Arthropoda	Insecta	Orthoptera	Gryllidae	Eumodicogryllus	bordigalensis		Eumodicogryllus bordigalensis	(Latreille, 1804)	Eumodicogryllus bordigalensis (Latreille, 1804)	species	INTR	Borges, P. A.V.	2017
DTP Collection_2238	Palearctic	Portugal	Azores	Terceira	Praia da Vitória	Paul do Belo Jardim	Paul do Belo Jardim - Margins; PBJ-T203	38°42’47.95’’N, 27°03’40.93’’W	38.7134	-27.0616	WGS84	5	10	2017-08-30	Night	Sweeping	sample 03	na	Brito, M.				1	1	Animalia	Arthropoda	Insecta	Orthoptera	Gryllidae	Eumodicogryllus	bordigalensis		Eumodicogryllus bordigalensis	(Latreille, 1804)	Eumodicogryllus bordigalensis (Latreille, 1804)	species	INTR	Borges, P. A.V.	2017
DTP Collection_2239	Palearctic	Portugal	Azores	Terceira	Praia da Vitória	Paul da Pedreira	Paul da Pedreira; PPCP-T202	38°42’13.09’’N; 27°02’46.37’’W	38.7043	-27.0465	WGS84	3	10	2016-06-21	Night	Sweeping	sample 03	na	Brito, M.				1	1	Animalia	Arthropoda	Insecta	Orthoptera	Gryllidae	Eumodicogryllus	bordigalensis		Eumodicogryllus bordigalensis	(Latreille, 1804)	Eumodicogryllus bordigalensis (Latreille, 1804)	species	INTR	Borges, P. A.V.	2016
DTP Collection_2607	Palearctic	Portugal	Azores	Terceira	Praia da Vitória	Paul do Belo Jardim	Paul do Belo Jardim - Margins; PBJ-T203	38°42’47.95’’N, 27°03’40.93’’W	38.7134	-27.0616	WGS84	5	10	2016-09-07	Day/Night	Pitfall	sample 02	na	Pimentel, C.				4	4	Animalia	Arthropoda	Insecta	Orthoptera	Gryllidae	Eumodicogryllus	bordigalensis		Eumodicogryllus bordigalensis	(Latreille, 1804)	Eumodicogryllus bordigalensis (Latreille, 1804)	species	INTR	Borges, P. A.V.	2016
DTP Collection_2608	Palearctic	Portugal	Azores	Terceira	Praia da Vitória	Paul do Belo Jardim	Paul do Belo Jardim - Stream; PBJ-T204	38°42’47.95’’N, 27°03’40.93’’W	38.7134	-27.0616	WGS84	5	10	2016-09-07	Day/Night	Pitfall	sample 02	na	Pimentel, C.				6	6	Animalia	Arthropoda	Insecta	Orthoptera	Gryllidae	Eumodicogryllus	bordigalensis		Eumodicogryllus bordigalensis	(Latreille, 1804)	Eumodicogryllus bordigalensis (Latreille, 1804)	species	INTR	Borges, P. A.V.	2016
DTP Collection_2609	Palearctic	Portugal	Azores	Terceira	Praia da Vitória	Paul da Pedreira	Paul da Pedreira; PPCP-T202	38°42’13.09’’N; 27°02’46.37’’W	38.7043	-27.0465	WGS84	3	10	2017-06-28	Day	Beating	sample 02	Morella faya	Pimentel, C.				1	1	Animalia	Arthropoda	Insecta	Orthoptera	Gryllidae	Eumodicogryllus	bordigalensis		Eumodicogryllus bordigalensis	(Latreille, 1804)	Eumodicogryllus bordigalensis (Latreille, 1804)	species	INTR	Borges, P. A.V.	2017
DTP Collection_2610	Palearctic	Portugal	Azores	Terceira	Praia da Vitória	Paul da Pedreira	Paul da Pedreira; PPCP-T202	38°42’13.09’’N; 27°02’46.37’’W	38.7043	-27.0465	WGS84	3	10	2017-06-21	Night	Beating	sample 02	na	Borges, P.A.V.				1	1	Animalia	Arthropoda	Insecta	Orthoptera	Gryllidae	Eumodicogryllus	bordigalensis		Eumodicogryllus bordigalensis	(Latreille, 1804)	Eumodicogryllus bordigalensis (Latreille, 1804)	species	INTR	Borges, P. A.V.	2017
DTP Collection_3009	Palearctic	Portugal	Azores	Terceira	Praia da Vitória	Paul do Belo Jardim	Paul do Belo Jardim - Stream; PBJ-T204	38°42’47.95’’N, 27°03’40.93’’W	38.7134	-27.0616	WGS84	5	10	2016-09-07	Day/Night	Pitfall	sample 01	na	Pimentel, C.				11	11	Animalia	Arthropoda	Insecta	Orthoptera	Gryllidae	Eumodicogryllus	bordigalensis		Eumodicogryllus bordigalensis	(Latreille, 1804)	Eumodicogryllus bordigalensis (Latreille, 1804)	species	INTR	Borges, P. A.V.	2016
DTP Collection_3010	Palearctic	Portugal	Azores	Terceira	Praia da Vitória	Paul da Praia Vitória	Paul da Praia Vitória- Margins; PPV-T200	38°44’06.44’’N, 27°03’36.21’’W	38.735	-27.06	WGS84	6	10	2016-08-26	Day/Night	Pitfall	sample 01	na	Pimentel, C.				3	3	Animalia	Arthropoda	Insecta	Orthoptera	Gryllidae	Eumodicogryllus	bordigalensis		Eumodicogryllus bordigalensis	(Latreille, 1804)	Eumodicogryllus bordigalensis (Latreille, 1804)	species	INTR	Borges, P. A.V.	2016
DTP Collection_3011	Palearctic	Portugal	Azores	Terceira	Praia da Vitória	Paul da Praia Vitória	Paul da Praia Vitória- Margins; PPV-T200	38°44’06.44’’N, 27°03’36.21’’W	38.735	-27.06	WGS84	6	10	2017-09-06	Day	Sweeping	sample 01	na	Pimentel, C.				1	1	Animalia	Arthropoda	Insecta	Orthoptera	Gryllidae	Eumodicogryllus	bordigalensis		Eumodicogryllus bordigalensis	(Latreille, 1804)	Eumodicogryllus bordigalensis (Latreille, 1804)	species	INTR	Borges, P. A.V.	2017
DTP Collection_2268	Palearctic	Portugal	Azores	Terceira	Praia da Vitória	Paul da Pedreira	Paul da Pedreira; PPCP-T202	38°42’13.09’’N; 27°02’46.37’’W	38.7043	-27.0465	WGS84	3	10	2016-06-21	Night	Sweeping	sample 03	na	Brito, M.	2				2	Animalia	Arthropoda	Insecta	Hemiptera	Cicadellidae	Euscelidius	variegatus		Euscelidius variegatus	(Kirschbaum, 1858)	Euscelidius variegatus (Kirschbaum, 1858)	species	NAT	Borges, P. A.V.	2016
DTP Collection_3052	Palearctic	Portugal	Azores	Terceira	Praia da Vitória	Paul da Pedreira	Paul da Pedreira; PPCP-T202	38°42’13.09’’N; 27°02’46.37’’W	38.7043	-27.0465	WGS84	3	10	2017-06-29	Day	Sweeping	sample 01	na	Pimentel, C.	2			1	3	Animalia	Arthropoda	Insecta	Hemiptera	Cicadellidae	Euscelidius	variegatus		Euscelidius variegatus	(Kirschbaum, 1858)	Euscelidius variegatus (Kirschbaum, 1858)	species	NAT	Borges, P. A.V.	2017
DTP Collection_3053	Palearctic	Portugal	Azores	Terceira	Praia da Vitória	Paul da Pedreira	Paul da Pedreira; PPCP-T202	38°42’13.09’’N; 27°02’46.37’’W	38.7043	-27.0465	WGS84	3	10	2017-06-21	Night	Beating	sample 01	na	Pimentel, C.	3				3	Animalia	Arthropoda	Insecta	Hemiptera	Cicadellidae	Euscelidius	variegatus		Euscelidius variegatus	(Kirschbaum, 1858)	Euscelidius variegatus (Kirschbaum, 1858)	species	NAT	Borges, P. A.V.	2017
DTP Collection_996	Palearctic	Portugal	Azores	Terceira	Praia da Vitória	Paul do Belo Jardim	Paul do Belo Jardim - Margins; PBJ-T203	38°42’47.95’’N, 27°03’40.93’’W	38.7134	-27.0616	WGS84	5	10	2017-08-03	Day	Beating	sample 09	Arundo donax	Pimentel, C.		1			1	Animalia	Arthropoda	Insecta	Dermaptera	Forficulidae	Forficula	auricularia		Forficula auricularia	Linnaeus, 1758	Forficula auricularia Linnaeus, 1758	species	INTR	Borges, P. A.V.	2017
DTP Collection_997	Palearctic	Portugal	Azores	Terceira	Praia da Vitória	Paul da Pedreira	Paul da Pedreira; PPCP-T202	38°42’13.09’’N; 27°02’46.37’’W	38.7043	-27.0465	WGS84	3	10	2017-06-28	Day	Beating	sample 09	Arundo donax	Pimentel, C.	3				3	Animalia	Arthropoda	Insecta	Dermaptera	Forficulidae	Forficula	auricularia		Forficula auricularia	Linnaeus, 1758	Forficula auricularia Linnaeus, 1758	species	INTR	Borges, P. A.V.	2017
DTP Collection_1168	Palearctic	Portugal	Azores	Terceira	Praia da Vitória	Paul da Pedreira	Paul da Pedreira; PPCP-T202	38°42’13.09’’N; 27°02’46.37’’W	38.7043	-27.0465	WGS84	3	10	2016-08-30	Day	Beating	sample 08	Arundo donax	Pimentel, C.	2				2	Animalia	Arthropoda	Insecta	Dermaptera	Forficulidae	Forficula	auricularia		Forficula auricularia	Linnaeus, 1758	Forficula auricularia Linnaeus, 1758	species	INTR	Borges, P. A.V.	2016
DTP Collection_1169	Palearctic	Portugal	Azores	Terceira	Praia da Vitória	Paul do Belo Jardim	Paul do Belo Jardim - Margins; PBJ-T203	38°42’47.95’’N, 27°03’40.93’’W	38.7134	-27.0616	WGS84	5	10	2017-08-03	Day	Beating	sample 08	Arundo donax	Pimentel, C.		1	1		2	Animalia	Arthropoda	Insecta	Dermaptera	Forficulidae	Forficula	auricularia		Forficula auricularia	Linnaeus, 1758	Forficula auricularia Linnaeus, 1758	species	INTR	Borges, P. A.V.	2017
DTP Collection_1317	Palearctic	Portugal	Azores	Terceira	Praia da Vitória	Paul do Belo Jardim	Paul do Belo Jardim - Margins; PBJ-T203	38°42’47.95’’N, 27°03’40.93’’W	38.7134	-27.0616	WGS84	5	10	2016-08-08	Day	Beating	sample 07	Arundo donax	Pimentel, C.	1				1	Animalia	Arthropoda	Insecta	Dermaptera	Forficulidae	Forficula	auricularia		Forficula auricularia	Linnaeus, 1758	Forficula auricularia Linnaeus, 1758	species	INTR	Borges, P. A.V.	2016
DTP Collection_1318	Palearctic	Portugal	Azores	Terceira	Praia da Vitória	Paul da Pedreira	Paul da Pedreira; PPCP-T202	38°42’13.09’’N; 27°02’46.37’’W	38.7043	-27.0465	WGS84	3	10	2016-08-30	Day	Beating	sample 07	Arundo donax	Pimentel, C.	2				2	Animalia	Arthropoda	Insecta	Dermaptera	Forficulidae	Forficula	auricularia		Forficula auricularia	Linnaeus, 1758	Forficula auricularia Linnaeus, 1758	species	INTR	Borges, P. A.V.	2016
DTP Collection_1473	Palearctic	Portugal	Azores	Terceira	Praia da Vitória	Paul do Belo Jardim	Paul do Belo Jardim - Margins; PBJ-T203	38°42’47.95’’N, 27°03’40.93’’W	38.7134	-27.0616	WGS84	5	10	2017-08-03	Day	Beating	sample 06	Arundo donax	Pimentel, C.		2	3		5	Animalia	Arthropoda	Insecta	Dermaptera	Forficulidae	Forficula	auricularia		Forficula auricularia	Linnaeus, 1758	Forficula auricularia Linnaeus, 1758	species	INTR	Borges, P. A.V.	2017
DTP Collection_1651	Palearctic	Portugal	Azores	Terceira	Praia da Vitória	Paul do Belo Jardim	Paul do Belo Jardim - Margins; PBJ-T203	38°42’47.95’’N, 27°03’40.93’’W	38.7134	-27.0616	WGS84	5	10	2017-08-03	Day	Beating	sample 05	Arundo donax	Pimentel, C.		1	1		2	Animalia	Arthropoda	Insecta	Dermaptera	Forficulidae	Forficula	auricularia		Forficula auricularia	Linnaeus, 1758	Forficula auricularia Linnaeus, 1758	species	INTR	Borges, P. A.V.	2017
DTP Collection_1889	Palearctic	Portugal	Azores	Terceira	Praia da Vitória	Paul da Praia Vitória	Paul da Praia Vitória- Margins; PPV-T200	38°44’06.44’’N, 27°03’36.21’’W	38.735	-27.06	WGS84	6	10	2016-08-26	Day/Night	Pitfall	sample 04	na	Pimentel, C.	1				1	Animalia	Arthropoda	Insecta	Dermaptera	Forficulidae	Forficula	auricularia		Forficula auricularia	Linnaeus, 1758	Forficula auricularia Linnaeus, 1758	species	INTR	Borges, P. A.V.	2016
[truncated: 2,322 more rows]
